# Supplementary material for: Whole Blood Transcriptome Characterization of 3xTg-AD Mouse and Its Modulation by Transcranial Direct Current Stimulation (tDCS)
Source: MDPI journal article supplement (doi:10.3390/ijms22147629), 2021-07-16

Supplementary Figures

**Supplementary Figure S1.** Scatterplot of the of the correlation between the expected and observed sequins' concentration.

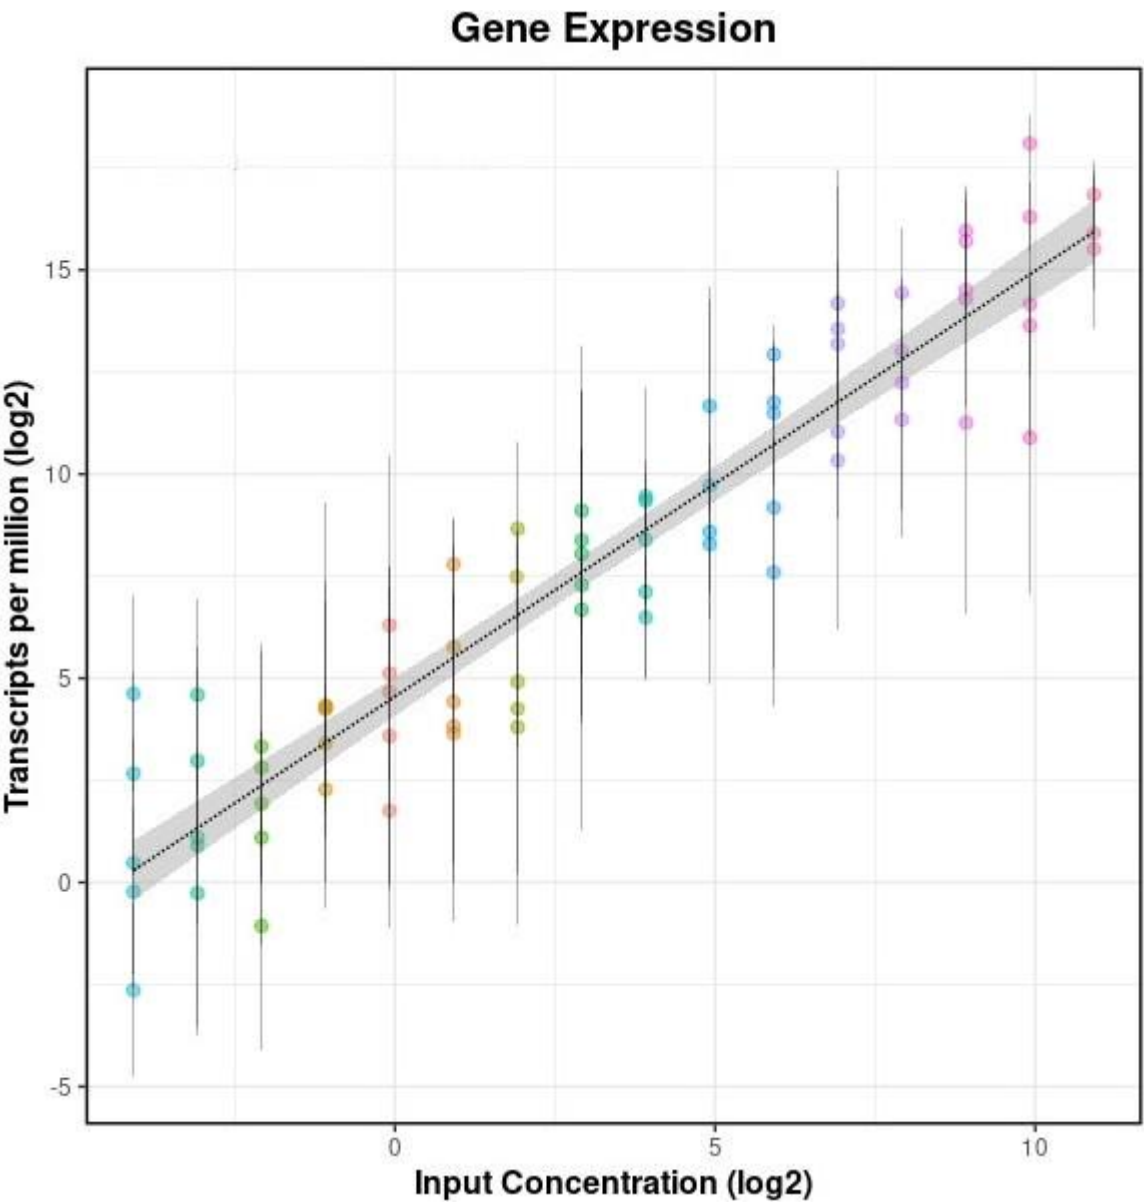

**Supplementary Figure S2.** Scree plot of the percentage of variance explained by the first ten principal components.

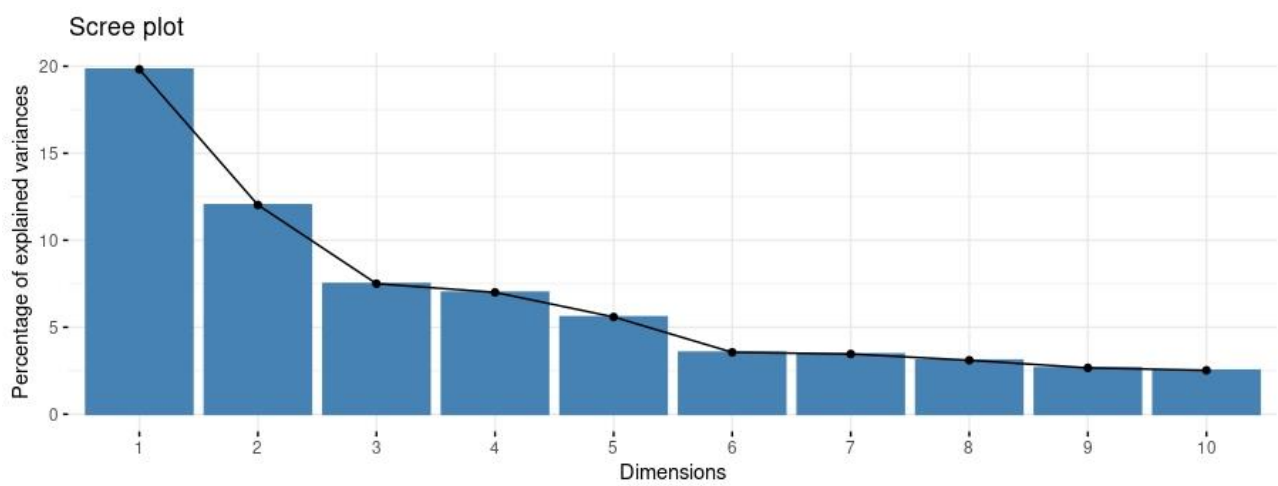

Supplement: s1 [file s1]
