# Supplementary material for: Whole Blood Transcriptome Characterization of 3xTg-AD Mouse and Its Modulation by Transcranial Direct Current Stimulation (tDCS)
Source: Int J Mol Sci. 2021 Jul 16;22(14):7629. doi: 10.3390/ijms22147629 (PMC8306644; doi:10.3390/ijms22147629)
Supplement: Supplementary file 1 [file ijms-22-07629-s001.zip › ijms-1279524_Supplementary_Tables_Rev1.xlsx]

## Sheet: SupTable.1
Supplementary Table 1. summary statistics of the differential expression analysis performed with DESeq2.
Note on p value set to NA. As reported in FAQ of DESeq, some values in the results table can be set to NA for one of the following reasons: (i) If within a row, all samples have zero counts, the baseMean column will be zero, and the log2 fold change estimates, p value and adjusted p value will all be set to NA; (ii) If a row contains a sample with an extreme count outlier then the p value and adj…
		1st Comparison: 3 mo. 3xTg-AD vs 3 mo. C57BL/6 mice.							2nd Comparison: 6 mo. 3xTg-AD vs 6 mo. C57BL/6 mice.							3rd Comparison: 6 mo. C57BL/6 vs 3 mo. C57BL/6 mice						Venn-intersection	KEGG Pathway:	Ochi's study DEGs		3xTg-AD tDCS vs Sham							C57BL/6 tDCS vs Sham
ensembl_gene_id	external_gene_name	baseMean.x	log2FoldChange.x	lfcSE.x	stat.x	pvalue.x	padj.x		baseMean.y	log2FoldChange.y	lfcSE.y	stat.y	pvalue.y	padj.y		baseMean	log2FoldChange	lfcSE	stat	pvalue	padj	Groups	Alzheimer disease	up-regulated	down-regulated	base mean	log2FoldChange	lfcSE	stat	pvalue	padj		base mean	log2FoldChange	lfcSE	stat	pvalue	padj
ENSMUSG00000000001	Gnai3	361.172	-0.639437	0.487397	1.92897	0.164871	0.537227		315.065	-0.287664	0.213963	1.7977	0.179991	0.436739		418.482	-0.502196	0.311067	2.85918	0.0908536	0.516242					322.894	0.468004	0.18442	6.21218	0.0126874	0.255849		393.463	-0.26054	0.255999	1.01604	0.31346	1
ENSMUSG00000000028	Cdc45	7.06424	0.474694	2.34571	0.0460757	0.830038	NA		9.93673	0.192435	0.892038	0.0477968	0.826942	0.924559		9.80758	0.285011	1.28673	0.0417306	0.838134	0.974417					7.61708	-1.17481	0.702915	2.62655	0.10509	NA		9.18183	-1.61973	1.03134	2.22815	0.135516	1
ENSMUSG00000000031	H19	44.5495	6.91865	2.17786	5.51452	0.0188592	0.189506		17.202	-1.72927	1.53905	1.04302	0.30712	0.579294		24.2675	5.02609	2.65498	2.29453	0.129831	0.597128					3.11396	-3.24003	1.11841	8.34683	0.00386361	NA		19.2533	-4.06167	1.99604	2.81744	0.093245	1
ENSMUSG00000000049	Apoh	1.51944	0.962306	4.3496	0.0393096	0.842837	NA		6.44243	-1.01506	1.01529	0.992234	0.319197	0.591223		9.20398	3.17415	1.17492	5.23943	0.0220805	0.271183					2.55672	-0.0314421	1.37096	1.09702e-05	0.997357	NA		12.6444	0.264418	0.78839	0.110997	0.739011	1
ENSMUSG00000000056	Narf	745.664	3.31403	0.869641	8.09702	0.00443381	0.0831733		1319.65	3.89332	0.381388	89.9941	2.38868e-21	1.32305e-18		283.65	-0.829446	0.679491	1.07336	0.300187	0.772539	B				1485.4	-0.617603	0.337879	3.32694	0.0681538	0.447799		198.661	0.12674	0.465113	0.0738819	0.785766	1
ENSMUSG00000000058	Cav2	7.43167	-0.507068	3.02312	0.00857705	0.926212	0.982487		11.8571	-2.28989	0.905867	5.03452	0.024847	0.135362		14.1084	2.08518	1.34092	2.11302	0.146051	0.619715					11.3219	1.13816	0.816138	1.3216	0.250305	NA		19.0279	0.724388	0.767476	0.928863	0.335159	1
ENSMUSG00000000078	Klf6	834.23	0.79178	0.423727	3.10818	0.0779002	0.385903		901.608	0.805219	0.266216	8.8833	0.0028779	0.0323281		835.018	-0.100976	0.291238	0.120084	0.728944	0.953758	B				923.246	-0.0139514	0.264703	0.0025428	0.959783	0.988943		895.105	0.0156548	0.254525	0.00378966	0.950913	1
ENSMUSG00000000085	Scmh1	69.4549	-1.15286	0.984645	1.59645	0.206408	0.584134		46.0726	-0.762345	0.472115	2.50405	0.113554	0.337906		74.1624	-0.820606	0.54987	2.6307	0.104815	0.544491					37.0678	0.182928	0.361528	0.245539	0.620234	NA		74.1797	0.198718	0.360577	0.308292	0.57873	1
ENSMUSG00000000088	Cox5a	22.5338	0.357815	1.02965	0.121695	0.727203	0.913354		52.8094	-0.21952	0.608396	0.133409	0.714923	0.869115		46.3218	0.903719	0.77592	1.03698	0.308524	0.77691		ENSMUSG00000000088			37.7582	-0.525217	0.331328	2.53025	0.111682	NA		76.8171	1.10461	0.612055	3.4208	0.0643799	1
ENSMUSG00000000120	Ngfr	8.60396	6.27023	2.73664	4.9564	0.0259942	0.222607		24.6555	-1.52659	0.702977	4.49774	0.0339397	0.166021		27.7094	4.90459	1.09887	12.9965	0.00031208	0.0249718	F				12.7975	-0.508115	0.752156	0.434244	0.509914	NA		35.5986	-0.311083	0.557597	0.305926	0.580191	1
ENSMUSG00000000125	Wnt3	4.67504	6.26789	5.46313	0.793107	0.373162	NA		2.01833	1.19035	1.9174	0.368948	0.543578	NA		1.18492	2.95576	3.66352	0.493397	0.482416	NA		ENSMUSG00000000125			1.63185	-0.875704	1.65532	-0.729699	1	NA		4.17832	2.09091	1.72661	1.52479	0.216896	1
ENSMUSG00000000126	Wnt9a	0	NA	NA	NA	NA	NA		0.75877	-0.191742	3.55833	-0.00422042	1	NA		0.92894	3.18416	3.88123	0.913878	0.339088	NA		ENSMUSG00000000126			1.37205	1.32103	3.05343	0.207735	0.648549	NA		1.76235	0.346636	2.54724	0.0405879	0.840335	1
ENSMUSG00000000127	Fer	31.8657	-0.229064	1.12438	0.0460125	0.830153	0.956107		35.3813	-0.0948736	0.446677	0.045755	0.830622	0.92642		36.2084	-0.410921	0.629013	0.429562	0.512204	0.895848					28.1359	-0.496078	0.364178	1.74193	0.186894	NA		45.2225	1.10142	0.489209	5.28315	0.0215328	1
ENSMUSG00000000131	Xpo6	232.826	-0.582264	0.716902	0.768063	0.380817	0.742688		219.214	-0.18142	0.272555	0.4434	0.505486	0.740314		281.21	-0.392622	0.489746	0.685645	0.407649	0.84135					206.137	0.288997	0.227238	1.56814	0.210478	0.654801		295.682	-0.345372	0.388647	0.770216	0.38015	1
ENSMUSG00000000134	Tfe3	139.24	0.817968	0.555233	2.11435	0.145924	0.509885		214.365	0.860047	0.334718	6.57104	0.0103651	0.0780282		182.554	0.53898	0.467556	1.17149	0.279094	0.757319					178.897	-0.243228	0.306292	0.593006	0.441259	0.819663		200.858	-0.679678	0.398471	2.75635	0.0968689	1
ENSMUSG00000000142	Axin2	28.5883	-1.13718	0.928994	1.59589	0.206486	0.584134		24.6299	0.878787	0.609729	2.08461	0.14879	0.394292		24.474	-1.10402	0.62123	3.83497	0.0501938	0.400045		ENSMUSG00000000142			22.1308	-0.503322	0.53039	0.919836	0.337518	NA		31.0308	0.889201	0.505954	3.2183	0.0728192	1
ENSMUSG00000000148	Brat1	27.0149	1.1501	2.0481	0.127946	0.720571	0.911689		32.5804	-0.329828	0.593947	0.286546	0.592443	0.800042		34.7184	1.37927	1.15382	1.11513	0.290969	0.764356					24.4469	-0.218629	0.371257	0.350184	0.554009	NA		43.6319	-0.714177	0.600134	1.34895	0.245462	1
ENSMUSG00000000149	Gna12	114.075	-0.568471	0.895076	0.484555	0.486366	0.806259		90.9223	0.099743	0.347001	0.0803137	0.776873	0.902435		129.392	-0.580391	0.571561	1.21995	0.26937	0.747251					78.451	0.167335	0.275308	0.347142	0.555736	NA		108.927	0.112974	0.430449	0.0695552	0.791985	1
ENSMUSG00000000154	Slc22a18	4.44862	0.580769	3.79959	-0.00545786	1	NA		8.75184	-1.52829	1.46068	1.01872	0.312822	0.584361		9.22609	3.99982	2.01125	3.81286	0.0508605	0.401143					4.00784	-1.12808	1.18618	0.746886	0.387464	NA		8.94961	-1.42524	1.19694	1.26962	0.259838	1
ENSMUSG00000000157	Itgb2l	13.9251	-1.37697	1.80231	0.666474	0.414284	0.767269		16.12	3.87855	1.02155	13.2602	0.000271106	0.00579257		6.37057	-2.75868	1.32379	5.18838	0.0227384	0.274401	B				50.6413	2.66188	0.802238	7.82497	0.00515293	NA		4.84819	1.4259	1.32905	1.25092	0.263377	1
ENSMUSG00000000168	Dlat	81.3842	0.208199	0.910547	0.0511795	0.821024	0.952705		66.6859	-0.364331	0.415059	0.759937	0.383348	0.648186		86.0211	-0.142471	0.540166	0.0711382	0.789687	0.969417					51.9664	-0.0857955	0.290672	0.0877808	0.767018	NA		82.6904	-0.737275	0.459999	2.43525	0.118635	1
ENSMUSG00000000171	Sdhd	304.254	-0.427406	0.591616	0.585105	0.444318	0.781987		301.167	-1.18273	0.306989	14.3315	0.000153283	0.00364261		461.113	0.219877	0.481936	0.215133	0.642774	0.931399	B	ENSMUSG00000000171			230.871	0.415991	0.362301	1.20559	0.272208	0.712308		483.488	-0.0226361	0.359874	0.00395498	0.949855	1
ENSMUSG00000000184	Ccnd2	1368.47	-0.143491	0.378994	0.150567	0.697994	0.903986		1485.32	0.787628	0.24916	9.9931	0.00157128	0.021228		1431.4	-0.433898	0.252273	3.13599	0.076582	0.481045	B			CCND2	1423.72	-0.107796	0.214053	0.253997	0.614275	0.90238		1581.16	-0.0969233	0.165818	0.339184	0.5603	1
ENSMUSG00000000194	Gpr107	124.41	0.760946	0.677113	1.28425	0.257109	0.634084		144.965	-0.0862619	0.280665	0.0930453	0.760341	0.891541		155.145	0.793103	0.414284	3.71883	0.0538021	0.409565					128.689	0.266192	0.20818	1.61056	0.204413	0.648889		190.45	-0.121166	0.268699	0.201971	0.653135	1
ENSMUSG00000000204	Slfn4	29.8727	-1.72421	1.17943	2.09422	0.147857	0.512657		29.4256	0.012111	0.51731	0.000558221	0.98115	0.995083		38.332	-0.82388	0.575091	2.14309	0.143213	0.615464					77.4676	1.86178	0.451726	14.2356	0.00016129	NA		37.2627	-0.794009	0.519202	2.23223	0.135159	1
ENSMUSG00000000223	Drp2	8.31903	3.20869	3.18285	0.310457	0.5774	0.854874		8.93492	2.58844	0.929301	7.67972	0.00558447	0.0511775		4.74869	-1.90581	1.54156	1.13727	0.286231	0.762129					7.74063	-1.00765	0.775902	1.69772	0.192586	NA		5.04512	0.69946	1.07435	0.42834	0.512804	1
ENSMUSG00000000244	Tspan32	291.094	-0.554338	0.479396	1.38114	0.239907	0.620409		311.145	0.64243	0.234745	7.51933	0.00610403	0.0541949		297.108	-0.653331	0.355648	3.81375	0.0508337	0.401143					306.981	-0.148467	0.207878	0.506959	0.476458	0.835032		319.387	0.210096	0.250458	0.714649	0.397905	1
ENSMUSG00000000253	Gmpr	841.513	-1.37102	0.58823	6.22459	0.0125988	0.14786		1111.21	-0.269938	0.294158	0.852744	0.355777	0.623227		1320.96	-0.427049	0.42323	0.962186	0.326637	0.78886					885.855	-0.146751	0.192307	0.591864	0.441699	0.819663		1253.04	-0.055595	0.338668	0.0268072	0.869944	1
ENSMUSG00000000266	Mid2	5.03529	-2.5598	3.01149	0.882546	0.347505	NA		4.22567	-3.07834	1.47339	3.89799	0.0483439	0.205733		8.64068	0.307303	1.75437	0.0358062	0.849916	0.975248					2.46347	0.829421	1.24923	0.545229	0.460274	NA		6.79398	-0.336791	1.4766	0.0504687	0.82225	1
ENSMUSG00000000275	Trim25	577.446	-1.92711	0.730784	8.81769	0.00298324	0.0655845		446.541	-0.0529231	0.250452	0.0435076	0.834772	0.928589		721.191	-0.982359	0.469829	5.28881	0.0214628	0.269464					378.701	0.18457	0.204767	0.775976	0.378375	0.785752		599.389	-0.107895	0.173545	0.383954	0.535495	1
ENSMUSG00000000276	Dgke	28.236	0.534117	1.04454	0.28655	0.59244	0.860678		21.0312	-0.123461	0.492654	0.0599168	0.806628	0.915963		27.4667	0.0652512	0.715522	0.0100084	0.920311	0.990832					22.0752	0.546732	0.401295	1.7334	0.187978	NA		30.4568	-0.49903	0.605705	0.65815	0.417214	1
ENSMUSG00000000278	Scpep1	229.822	0.0392	0.560376	0.00522467	0.942378	0.986728		247.494	-0.864027	0.301461	7.94534	0.00482115	0.0465154		359.225	0.423681	0.399116	1.05622	0.304079	0.773977	B				151.361	0.0911024	0.230486	0.150023	0.698514	0.926425		398.254	-0.423661	0.335526	1.54293	0.214183	1
ENSMUSG00000000282	Mnt	131.15	-0.672843	0.654677	1.20207	0.272909	0.649088		121.405	-0.363598	0.251594	2.07225	0.15	0.395704		168.593	-0.29904	0.387952	0.635122	0.425483	0.849217					107.958	0.353617	0.227542	2.40563	0.1209	NA		172.005	-0.230611	0.289231	0.628199	0.428017	1
ENSMUSG00000000290	Itgb2	1415.81	-0.298607	0.39725	0.608497	0.435354	0.777173		1462.05	-0.197187	0.234625	0.710253	0.39936	0.661824		1815.41	-0.230556	0.315741	0.517687	0.47183	0.87256					1289.42	0.15463	0.201906	0.583628	0.444894	0.820066		2046.21	0.142789	0.218741	0.430486	0.511751	1
ENSMUSG00000000295	Hddc2	38.6229	-0.992803	1.00668	0.833275	0.361327	0.728406		36.4737	-0.975728	0.511153	3.41288	0.0646896	0.244321		59.6452	0.128446	0.535245	0.0580493	0.809606	0.971845					31.1977	0.876395	0.42476	3.91185	0.0479469	NA		79.3482	0.768372	0.341444	5.2664	0.0217409	1
ENSMUSG00000000296	Tpd52l1	3.65726	5.9211	5.78282	0.670593	0.412845	NA		6.95202	-1.96698	1.50368	1.60754	0.204838	0.467269		9.69103	6.6968	3.42548	2.74258	0.0977066	0.529128					1.32178	-2.11066	1.55614	2.32067	0.127665	NA		8.54827	-2.08363	3.26837	0.332992	0.563903	1
ENSMUSG00000000301	Pemt	3.265	-5.53587	3.81642	2.57994	0.108226	NA		0.884102	-0.123993	1.83003	0.00266482	0.95883	NA		3.32526	-2.78783	1.80204	3.03421	0.0815264	NA					0.819134	0.299408	1.54099	-0.0114932	1	NA		3.56487	0.573313	1.54939	0.142081	0.706221	1
ENSMUSG00000000303	Cdh1	97.387	-0.809352	0.827798	1.07372	0.300106	0.673746		174.208	-1.533	0.549311	7.0722	0.00782889	0.0640954		239.926	1.16692	0.515092	5.39392	0.020207	0.261798					113.608	0.11018	0.603483	0.0320662	0.857882	0.962596		245.146	-0.176725	0.485754	0.130737	0.717669	1
ENSMUSG00000000318	Clec10a	38.7569	-0.139972	0.972693	0.0219334	0.882264	0.970078		42.7415	-0.541346	0.492769	1.19296	0.274734	0.54815		52.7456	0.671719	0.672872	1.08093	0.29849	0.770062					33.0584	0.548806	0.516131	1.03213	0.309659	NA		78.638	0.0631912	0.543348	0.0136428	0.907017	1
ENSMUSG00000000320	Alox12	9006.39	-1.37078	0.469795	9.11882	0.00252993	0.0592692		10750	-0.833057	0.313927	6.97719	0.00825551	0.0661958		15170.8	-0.316558	0.481809	0.370501	0.542731	0.906462					8081.23	0.00890964	0.186637	0.00230257	0.961728	0.989944		14462.1	-0.120491	0.36819	0.105818	0.744956	1
ENSMUSG00000000326	Comt	64.6142	1.04615	0.837196	1.27248	0.259303	0.636749		90.5873	0.312732	0.384646	0.666707	0.414202	0.673927		65.79	0.763233	0.543044	1.87867	0.170485	0.652098					91.7521	0.039344	0.29333	0.0180318	0.893179	NA		99.5057	0.542752	0.399938	1.89655	0.168465	1
ENSMUSG00000000340	Dbt	28.4857	-0.098674	0.942116	0.0109501	0.916659	0.978682		27.0712	0.5234	0.552438	0.899392	0.342945	0.611476		32.0077	-0.265811	0.596187	0.205691	0.650166	0.933433					22.287	-0.081516	0.433715	0.0353423	0.85088	NA		37.173	0.296507	0.487809	0.376142	0.539676	1
ENSMUSG00000000346	Dazap2	38579.5	0.399421	0.486245	0.595589	0.440266	0.778938		52384.6	-0.06152	0.283381	0.0476908	0.827131	0.924559		45295.4	0.143053	0.37556	0.131043	0.717354	0.951539					44256.9	-0.313402	0.192419	2.70219	0.100211	0.508497		49226	-0.108914	0.300239	0.130435	0.717982	1
ENSMUSG00000000355	Mcts1	255.597	0.0768142	0.630293	0.0128522	0.909739	0.977687		235.378	-0.250552	0.261555	0.913192	0.339269	0.608596		304.61	-0.00474926	0.428353	0.000120934	0.991226	0.999244					231.362	0.466541	0.177508	6.77984	0.00921933	0.224969		371.629	0.264804	0.327786	0.662288	0.415753	1
ENSMUSG00000000365	Rnf17	4.8143	-0.0950685	3.19307	0.000388326	0.984278	NA		5.22575	1.34951	1.20119	1.24215	0.265057	0.53777		5.28682	-1.56166	1.75449	0.455729	0.499627	0.888754					4.20232	-1.01228	0.801009	1.62681	0.202145	NA		3.78268	1.05271	1.54229	0.435104	0.509495	1
ENSMUSG00000000374	Trappc10	349.27	0.540512	0.539996	0.93352	0.33395	0.70521		374.93	0.929131	0.236503	15.4668	8.39687e-05	0.00227299		280.183	-0.378242	0.354273	1.19523	0.274277	0.752805	B				419.504	-0.127812	0.251253	0.257289	0.611989	0.901536		313.971	0.0810449	0.304439	0.0712762	0.789488	1
ENSMUSG00000000378	Ccm2	380.351	-0.78469	0.508899	2.68408	0.101356	0.435057		435.623	-0.486789	0.276709	3.03639	0.0814169	0.277671		582.941	0.151646	0.402632	0.149742	0.698782	0.94785					315.018	0.11764	0.220694	0.266343	0.605796	0.900629		620.596	-0.319319	0.289297	1.18897	0.275537	1
ENSMUSG00000000384	Tbrg4	39.6649	-0.276183	0.933466	0.0963125	0.756301	0.925382		39.2487	0.0343422	0.49063	0.00483884	0.944542	0.97916		48.5064	0.051042	0.583589	0.00874101	0.925512	0.991872					32.0569	0.104638	0.398857	0.069515	0.792044	NA		59.9645	0.0348603	0.478438	0.00534522	0.941718	1
ENSMUSG00000000385	Tmprss2	5.21468	4.44633	3.11922	1.61932	0.203186	NA		32.4597	-3.74015	1.55978	4.19656	0.0405061	0.184949		49.9856	8.02523	1.58556	26.8221	2.23071e-07	0.000174528	F				7.05437	-0.0268208	1.05323	-0.00943615	1	NA		43.1797	-2.41152	1.52646	1.97425	0.159997	1
ENSMUSG00000000386	Mx1	1.48225	-2.49798	5.59636	0.119675	0.729388	NA		7.8284	-0.344371	1.02469	0.111279	0.738693	0.880353		7.2906	1.92951	1.29662	1.6463	0.199464	0.685969					5.78899	-0.573659	1.00581	0.29763	0.585372	NA		10.1181	-0.202636	0.951178	0.0446098	0.832723	1
ENSMUSG00000000392	Fap	27.1533	-0.659112	1.09455	0.362853	0.546926	0.841726		19.6884	-1.21474	0.86394	1.89579	0.168551	0.421406		23.0043	-1.28665	1.11976	1.30096	0.254039	0.73488					19.3638	0.478458	0.546241	0.716639	0.397249	NA		15.4613	-2.67233	1.02959	5.67003	0.0172571	1
ENSMUSG00000000399	Ndufa9	110.183	0.282996	0.957302	0.0623122	0.802878	0.94544		105.953	-0.064476	0.327667	0.0387064	0.844031	0.933233		123.266	0.142559	0.585553	0.0573651	0.81071	0.972379		ENSMUSG00000000399			102.703	0.23327	0.275163	0.698001	0.403456	NA		160.934	0.119547	0.360116	0.111067	0.738933	1
ENSMUSG00000000402	Egfl6	0.779121	2.08575	5.74529	0.165391	0.684241	NA		2.44298	2.63401	2.1648	1.91928	0.165936	NA		0.279016	0.248724	3.92869	0.00632679	0.936602	NA					1.71338	-2.28243	1.60539	2.1678	0.140928	NA		1.14788	3.20473	2.82831	1.60069	0.205805	1
ENSMUSG00000000409	Lck	811.121	-1.55308	0.524571	10.5836	0.00114095	0.036942		666.979	-0.343433	0.330291	1.08168	0.298322	0.571295		998.962	-0.739847	0.340933	5.39071	0.0202442	0.26204	A				611.52	0.382198	0.248475	2.29055	0.130164	0.559705		999.873	-0.66382	0.263551	6.00702	0.0142491	1
ENSMUSG00000000416	Cttnbp2	148.22	10.7785	1.97129	58.0602	2.54218e-14	2.59069e-11		326.378	5.8925	0.386649	259.791	1.90601e-58	4.57475e-55		2.59346	4.29822	1.9846	4.17557	0.0410107	NA	C				413.485	-0.00226145	0.329466	4.37291e-05	0.994724	0.998604		5.23061	1.27512	0.958716	1.83661	0.175348	1
ENSMUSG00000000420	Galnt1	4011.06	0.386108	0.451395	0.654068	0.418662	0.769385		5371.3	0.102491	0.286321	0.130997	0.717401	0.870489		5047.52	0.209518	0.368159	0.286338	0.592577	0.920268					5510.91	0.0386659	0.28736	0.0177993	0.893866	0.973376		6390.94	-0.0209281	0.317843	0.00432732	0.947551	1
ENSMUSG00000000439	Mkrn2	22.7736	-1.19024	1.21124	1.12936	0.287912	0.664066		15.8575	0.65444	0.62304	1.12713	0.288389	0.561952		19.7668	-1.54395	0.725878	5.21169	0.0224355	0.272743					15.9527	-0.0250304	0.427432	0.00341693	0.953387	NA		19.2887	0.635397	0.622192	1.07149	0.30061	1
ENSMUSG00000000440	Pparg	37.5067	3.50332	1.82366	1.64468	0.199685	0.576978		41.9684	0.744151	0.583004	1.55106	0.212979	0.477966		31.9344	2.32222	1.01324	4.1662	0.0412381	0.367938					41.9984	0.173289	0.479062	0.129048	0.719422	NA		36.1244	-0.874744	0.644731	1.73037	0.188364	1
ENSMUSG00000000441	Raf1	8.51581	2.63378	3.42071	0.181891	0.669753	0.892562		9.32645	1.37887	0.948721	2.04611	0.152596	0.398581		9.5683	-0.860454	1.25053	0.316115	0.573952	0.915922		ENSMUSG00000000441			7.41501	-1.03815	0.747764	1.92893	0.164876	NA		3.96491	-2.06241	1.22625	2.63202	0.104728	1
ENSMUSG00000000486	Septin1	962.274	1.90028	0.408568	19.1388	1.21551e-05	0.00148644		1305.64	0.2743	0.386499	0.50212	0.47857	0.722042		1086.77	1.10067	0.582989	2.78899	0.0949143	0.524348	A				927.667	-0.805048	0.206335	15.4915	8.28764e-05	0.0488349		1105.94	-0.79338	0.446343	2.94445	0.0861733	1
ENSMUSG00000000489	Pdgfb	12.061	3.44827	1.72775	2.75882	0.0967194	0.426074		18.4355	0.412101	0.475772	0.731922	0.392261	0.655897		12.7539	1.78711	0.830033	3.64122	0.0563655	0.423219					18.0825	-0.280825	0.471266	0.324891	0.568683	NA		17.1315	-0.723116	0.688548	1.06561	0.30194	1
ENSMUSG00000000530	Acvrl1	27.6704	0.0968829	1.164	0.00757852	0.930628	0.983805		34.1328	0.974029	0.542791	3.24709	0.0715505	0.257729		27.225	0.00821068	0.614954	0.000196214	0.988824	0.99888					55.9206	1.24954	0.454547	6.79614	0.00913554	NA		34.0093	-0.113817	0.479257	0.0559703	0.812982	1
ENSMUSG00000000531	Grasp	13.9203	-3.83441	1.90806	3.08054	0.0792344	0.388827		10.4027	0.445818	0.816744	0.272487	0.601668	0.806687		15.9289	-0.895169	1.27663	0.639732	0.423808	0.848785					10.8297	0.438173	0.462966	0.891907	0.344961	NA		12.8651	-0.949258	0.982737	0.873144	0.350087	1
ENSMUSG00000000532	Acvr1b	56.7586	-1.90169	0.957736	5.01563	0.0251194	0.219105		39.5694	-0.927482	0.647077	1.97997	0.159393	0.408551		63.4745	-0.121129	0.848024	0.0253977	0.87338	0.981306					34.8857	0.537076	0.425623	1.53836	0.214862	NA		56.6568	-0.237656	0.588482	0.160998	0.688239	1
ENSMUSG00000000538	Tom1l2	76.6287	-0.764907	0.86265	0.911601	0.33969	0.709737		101.928	-0.0882757	0.346391	0.0641783	0.80001	0.91349		116.042	0.131617	0.546991	0.0639563	0.800349	0.97073					99.0773	0.386862	0.295475	1.59081	0.207211	NA		127.435	-0.241693	0.387711	0.381288	0.536914	1
ENSMUSG00000000552	Zfp385a	79.1223	1.20895	0.649682	3.32708	0.0681478	0.363147		64.453	-0.850267	0.528928	2.56899	0.108977	0.329979		91.4395	0.539592	0.606245	0.641731	0.423085	0.848782					38.8578	0.305873	0.435489	0.446779	0.503869	NA		98.2881	-0.371556	0.549899	0.44059	0.506838	1
ENSMUSG00000000555	Itga5	6.49031	-3.41475	2.08371	3.44669	0.0633785	NA		3.08982	-2.34206	1.16966	4.00164	0.045456	NA		7.05891	-1.03858	1.07162	1.06898	0.301175	0.773564					2.38096	0.84972	0.856754	0.930818	0.334651	NA		4.61379	-0.405775	1.14831	0.123018	0.725784	1
ENSMUSG00000000561	Wdr77	68.3649	-0.857911	0.712984	1.63683	0.20076	0.578269		90.6218	0.179505	0.320298	0.310494	0.577377	0.78821		87.2142	-0.143603	0.481424	0.10305	0.7482	0.958073					93.2238	0.19603	0.256349	0.576546	0.447669	NA		111.224	0.0322856	0.328174	0.00974163	0.921377	1
ENSMUSG00000000562	Adora3	17.5815	0.60492	1.19781	0.219419	0.639483	0.879568		18.037	1.51378	0.690671	4.54149	0.0330827	0.163383		13.8013	-0.0377394	0.814999	0.00244367	0.960574	0.996196					19.4735	0.100659	0.561771	0.031661	0.858774	NA		18.6553	0.0092575	0.673197	0.00019182	0.98895	1
ENSMUSG00000000563	Atp5pb	1094.59	-0.129393	0.367787	0.121668	0.727233	0.913354		1427.18	0.0649425	0.236682	0.0765251	0.782063	0.905013		1258.17	-0.116202	0.29253	0.159194	0.689899	0.943363		ENSMUSG00000000563			1630.58	0.358344	0.226534	2.4727	0.115839	0.535356		1445.69	0.14415	0.267573	0.293012	0.588297	1
ENSMUSG00000000567	Sox9	35.057	4.23211	1.95828	1.92312	0.165513	0.53774		101.956	-2.53785	1.37583	2.88964	0.0891506	0.292851		135.027	5.67374	1.50507	8.22951	0.00412146	0.118454					33.8362	-0.759664	0.880853	0.459263	0.497969	NA		122.639	-1.57021	1.25103	1.39113	0.238215	1
ENSMUSG00000000568	Hnrnpd	241.39	-0.592446	0.637279	1.01837	0.312905	0.685264		254.535	-0.640606	0.289918	4.75906	0.0291445	0.15038		352.207	-0.039991	0.455694	0.00784146	0.929438	0.991872					172.635	0.0168958	0.199736	0.00673112	0.934612	0.98607		376.11	-0.00915798	0.40453	0.000513454	0.981922	1
ENSMUSG00000000579	Dynlt1c	0.0817843	-1.33829	5.78167	0.156436	0.692459	NA		2.57503	-1.73	1.77085	0.960684	0.327015	NA		1.97103	2.15145	2.46667	0.70209	0.402082	NA					1.53691	-0.483061	1.16013	0.178069	0.673038	NA		4.82949	1.4372	1.36768	1.135	0.286712	1
ENSMUSG00000000581	C1d	85.9093	-0.561561	0.724665	0.56975	0.450358	0.785541		81.8033	-0.364445	0.362948	1.01053	0.314776	0.586384		122.303	0.107939	0.416979	0.0699192	0.791454	0.969495					70.3198	0.55823	0.291581	3.57823	0.0585415	NA		144.01	0.51652	0.328374	2.55248	0.110121	1
ENSMUSG00000000594	Gm2a	1127.02	0.872583	0.389588	4.8076	0.0283345	0.234137		1102.62	0.424379	0.233902	3.29556	0.0694672	0.253908		1091.08	0.0629306	0.302707	0.0429938	0.835737	0.974411					999.158	-0.0942503	0.215018	0.19472	0.659017	0.915094		1339.3	0.114854	0.232228	0.246956	0.619227	1
ENSMUSG00000000600	Krit1	157.345	-0.204352	0.524857	0.147481	0.700954	0.904627		149.529	0.372335	0.292713	1.60855	0.204696	0.467092		184.464	-0.450243	0.318266	1.94543	0.16308	0.645129					140.071	-0.148396	0.205547	0.517707	0.471821	0.833134		169.19	-0.262149	0.316455	0.672261	0.412264	1
ENSMUSG00000000605	Clcn4	176.079	-0.343556	0.704141	0.250024	0.617058	0.871061		251.083	0.177565	0.27122	0.422135	0.515873	0.747996		257.614	0.173038	0.32749	0.281517	0.595708	0.920648					213.212	-0.146042	0.182443	0.63829	0.424331	0.812494		289.293	-0.268842	0.253351	1.10157	0.293922	1
ENSMUSG00000000617	Grm6	0.187002	1.64152	5.90235	0.117964	0.731254	NA		5.5376	0.950475	1.46189	0.391349	0.531591	0.758845		2.27315	4.03813	3.19357	1.11807	0.290335	NA					2.80773	-3.53784	1.16612	9.22802	0.00238339	NA		2.81579	0.0285508	1.96117	-9.40319e-05	1	1
ENSMUSG00000000627	Sema4f	18.1228	3.75332	1.56125	3.48239	0.062025	0.345717		22.5892	0.91612	0.65265	2.03019	0.154202	0.401348		15.2656	1.73116	0.826716	3.2952	0.0694827	0.458975					26.0465	0.156858	0.409951	0.144148	0.704192	NA		26.9802	0.126082	0.563851	0.050279	0.822579	1
ENSMUSG00000000628	Hk2	130.965	0.428236	0.669493	0.352916	0.552467	0.843882		161.482	0.842065	0.258429	10.6	0.0011309	0.0167725		133.697	0.127888	0.38883	0.108992	0.741295	0.956801	B				157.324	-0.0818984	0.24595	0.110619	0.73944	0.941366		159.068	0.228283	0.389442	0.349332	0.554491	1
ENSMUSG00000000631	Myo18a	188.305	1.58147	0.525083	7.87239	0.00501953	0.0901378		205.335	-0.0791428	0.295629	0.0712263	0.78956	0.909307		221.438	0.998968	0.475141	3.92409	0.0475988	0.391093					172.411	0.0956632	0.179937	0.2848	0.593573	0.897055		258.271	-0.676404	0.385396	2.91811	0.0875902	1
ENSMUSG00000000632	Sez6	46.5902	-0.0931721	0.990957	0.00748738	0.931045	0.98393		48.1304	-0.413758	0.531248	0.597525	0.439524	0.693279		59.6555	-0.189647	0.694896	0.0628915	0.801983	0.971112					41.12	0.0275568	0.384889	0.00486883	0.944371	NA		68.0942	0.901486	0.559984	2.68511	0.10129	1
ENSMUSG00000000673	Haao	46.3012	-0.596476	1.01459	0.312033	0.576435	0.854617		56.525	-2.26809	0.559346	14.9015	0.000113273	0.00284189		102.094	0.860707	0.587146	1.94195	0.163457	0.645782	B				18.9154	0.246834	0.56825	0.184461	0.667568	NA		129.723	-0.339962	0.379486	0.78351	0.37607	1
ENSMUSG00000000682	Cd52	6775.32	-0.836791	0.378426	5.44908	0.0195786	0.192311		6544.7	-0.260896	0.280614	0.847594	0.357234	0.624127		8692.15	-0.298308	0.421742	0.561927	0.453485	0.862448					6684.85	0.531855	0.14267	13.3641	0.000256481	0.0492029		10725.4	0.409521	0.313152	1.75855	0.184805	1
ENSMUSG00000000686	Abhd15	6.00211	-8.44078	3.22302	7.7832	0.00527343	NA		5.27292	0.199919	1.13871	0.0121156	0.912353	0.965413		8.47947	-1.58285	1.17969	2.12204	0.145193	0.618224					2.74827	-2.00811	1.19165	1.64985	0.198979	NA		5.43765	0.578054	1.11206	0.275014	0.599988	1
ENSMUSG00000000693	Loxl3	8.83558	-5.54165	2.14816	6.40354	0.0113893	0.139562		9.96955	-2.27545	0.785316	8.13307	0.0043465	0.0430636		18.5428	-0.616988	0.841481	0.584292	0.444635	0.858481	B				5.95449	0.713019	0.615258	1.22717	0.267957	NA		18.8129	-0.111429	0.73641	0.0226577	0.880351	1
ENSMUSG00000000708	Kat2b	173.927	-0.173328	0.569743	0.086678	0.768444	0.930904		188.99	0.45757	0.288501	2.51669	0.112647	0.336143		167.366	-0.622813	0.368713	2.99943	0.0832936	0.499474					189.09	-0.101293	0.230755	0.19113	0.661978	0.915094		165.165	0.195433	0.285407	0.475059	0.490669	1
ENSMUSG00000000711	Rab5b	186.856	-0.486951	0.515781	0.929636	0.334958	0.706119		215.402	0.380515	0.285152	1.81859	0.177481	0.433601		237.816	-0.224559	0.381227	0.356071	0.550696	0.908571					187.998	-0.0181821	0.204404	0.0078063	0.929596	0.984872		258.47	0.102782	0.299483	0.118874	0.730259	1
ENSMUSG00000000732	Icosl	158.591	0.120454	0.786135	0.0268544	0.869831	0.967232		176.166	-0.576921	0.360638	2.48331	0.11506	0.340508		234.077	0.71313	0.536479	1.86706	0.171812	0.655015					112.226	0.0687133	0.283383	0.0572377	0.810916	NA		278.711	-0.172578	0.410322	0.17492	0.675776	1
ENSMUSG00000000738	Spg7	170.357	1.31514	0.606274	3.90799	0.0480569	0.305759		230.467	0.674138	0.276538	5.9631	0.0146083	0.0975764		166.94	0.368191	0.411812	0.681198	0.409175	0.84135					230.602	-0.167603	0.19809	0.720181	0.396084	0.797839		214.671	-0.170555	0.311437	0.295932	0.586444	1
ENSMUSG00000000739	Sult5a1	5.83674	7.07425	3.34485	3.72326	0.0536594	NA		10.9578	-0.47469	1.2629	0.134487	0.713825	0.868299		2.81964	4.2055	2.41222	2.0905	0.148217	NA					5.86837	-3.00946	1.04867	5.57186	0.0182514	NA		3.23959	-1.39538	1.51337	0.7977	0.371782	1
ENSMUSG00000000740	Rpl13	15082.2	-1.21531	0.34602	12.8675	0.000334342	0.0165199		13856.3	-0.59346	0.289823	4.13807	0.041929	0.189492		20993.7	-0.382993	0.383352	1.05768	0.303745	0.773977	A				10277.9	0.140584	0.180789	0.602709	0.437546	0.819465		22243.1	0.423296	0.303024	2.00637	0.156639	1
ENSMUSG00000000743	Chmp1a	519.817	-0.861774	0.404861	4.90466	0.0267844	0.226519		736.674	-0.21401	0.311964	0.46747	0.494154	0.732281		899.003	0.477175	0.349169	1.9368	0.164016	0.646834					580.517	0.241606	0.290736	0.626754	0.428548	0.812494		1060.04	0.0535206	0.320713	0.0279364	0.867258	1
ENSMUSG00000000751	Rpa1	323.382	0.0496563	0.496034	0.0105895	0.918038	0.979177		298.606	-0.00926864	0.239589	0.00149561	0.969151	0.990121		331.231	-0.290334	0.298592	1.00275	0.316645	0.782963					267.977	-0.0443089	0.202201	0.0487219	0.825302	0.952284		390.478	-0.287165	0.28977	0.961882	0.326713	1
ENSMUSG00000000753	Serpinf1	13.7564	8.38715	2.46067	12.0793	0.00050986	0.0216747		6.89564	-2.31908	1.43608	2.44506	0.117895	0.344453		10.16	4.9323	1.73883	5.87849	0.0153269	0.230362	A				1.96766	-1.10943	1.62813	0.40763	0.523175	NA		8.96347	-3.4578	1.37441	5.30384	0.0212784	1
ENSMUSG00000000759	Tubgcp3	31.1971	4.88323	1.62115	5.09917	0.0239373	0.213671		40.1518	0.537444	0.431514	1.55683	0.21213	0.476879		32.0773	1.75202	0.928668	1.91922	0.165943	0.647383					39.5653	-0.141425	0.323353	0.188152	0.664459	NA		36.7206	0.0624299	0.395327	0.0250456	0.874254	1
ENSMUSG00000000776	Polr3d	18.0254	7.21017	2.01101	10.4976	0.0011953	0.0376656		16.2301	-0.210035	0.546235	0.143187	0.705133	0.86437		16.0207	3.6007	1.13858	7.96591	0.00476664	0.126352	A				15.8671	0.15915	0.620697	0.0636977	0.800744	NA		25.0451	0.388979	0.735967	0.287962	0.591529	1
ENSMUSG00000000782	Tcf7	363.824	0.104653	0.421072	0.0629413	0.801906	0.945239		271.035	0.132838	0.374338	0.127029	0.721533	0.872376		315.935	-0.629064	0.375774	3.05991	0.080246	0.490923					308.191	0.436441	0.290209	2.19183	0.138745	0.572052		415.216	0.0311826	0.311804	0.0100348	0.920206	1
ENSMUSG00000000787	Ddx3x	1123.71	0.923653	0.461453	3.41827	0.0644786	0.353433		1265.09	0.1029	0.198509	0.269903	0.603397	0.807664		1371.53	0.417889	0.319093	1.52846	0.216344	0.705047					1250.14	0.180079	0.195394	0.84495	0.357985	0.778525		1665.9	-0.0400648	0.233103	0.0294377	0.863772	1
ENSMUSG00000000791	Il12rb1	6.86047	-3.05539	2.03186	2.77764	0.0955889	NA		8.95058	-0.243347	0.789616	0.0966093	0.755937	0.889254		8.71114	-0.0932848	1.19892	0.00502813	0.94347	0.994527					8.08976	-0.260636	0.570027	0.199904	0.654799	NA		11.6029	-1.06189	0.820915	1.62962	0.201755	1
ENSMUSG00000000804	Usp32	1164.66	0.567188	0.410981	1.72348	0.189245	0.566124		1991.43	0.794846	0.280338	8.20195	0.00418454	0.0419832		1286.59	0.00381427	0.413758	7.60922e-05	0.99304	0.999459	B				2172.34	-0.0845796	0.216989	0.153089	0.695601	0.925807		1371.74	-0.145252	0.352399	0.167957	0.681934	1
ENSMUSG00000000805	Car4	9.19256	-2.24351	3.17973	0.565278	0.452141	0.786632		14.5408	-7.72395	3.0221	4.34621	0.0370913	0.175824		29.8463	2.74789	2.70038	0.849288	0.356754	0.811764					1.83245	3.35792	2.82092	1.22802	0.267793	NA		22.4373	-3.43036	2.47559	1.37943	0.240199	1
ENSMUSG00000000811	Txnrd3	13.4933	-0.13528	1.37715	0.0109554	0.916639	0.978682		14.8562	-1.13	0.802044	1.98656	0.158701	0.407897		16.4026	-0.241567	0.87975	0.0727242	0.787411	0.969397					10.2827	-0.198494	0.645519	0.0894969	0.764818	NA		14.5817	-1.46402	0.943929	2.17973	0.139839	1
ENSMUSG00000000817	Fasl	16.4523	-1.74361	1.42485	1.67044	0.196199	0.573412		9.91123	-0.41686	0.897175	0.21854	0.640155	0.828364		14.9272	-2.95824	1.00481	7.30174	0.00688878	0.154975					7.12387	-0.8031	0.705199	1.25692	0.262235	NA		11.6948	0.495736	1.02698	0.230934	0.630832	1
ENSMUSG00000000826	Dnajc5	433.098	-0.288824	0.40966	0.48709	0.485228	0.805584		452.361	0.00861217	0.227475	0.00141494	0.969994	0.99042		511.986	-0.129049	0.329845	0.166406	0.683325	0.941806					438.826	0.205766	0.181183	1.28077	0.257755	0.697173		559.464	-0.345874	0.240135	2.02393	0.154838	1
ENSMUSG00000000827	Tpd52l2	187.495	-0.0327752	0.626668	0.00239765	0.960947	0.991262		237.466	-0.0313511	0.254369	0.0153593	0.901369	0.959607		246.705	0.227724	0.341238	0.437779	0.508197	0.893684					230.75	0.149534	0.266979	0.309245	0.578144	0.889224		296.424	0.100842	0.243686	0.172497	0.677902	1
ENSMUSG00000000838	Fmr1	103.061	0.812768	0.610552	1.65954	0.197666	0.574989		82.5714	-0.290689	0.361235	0.642611	0.422767	0.680291		109.59	0.100445	0.431067	0.0505611	0.82209	0.973226					70.7794	0.18389	0.290188	0.395626	0.529357	NA		120.165	-0.0745231	0.314921	0.055525	0.813714	1
ENSMUSG00000000861	Bcl11a	530.165	0.608329	0.408471	2.14581	0.14296	0.505861		523.577	0.0345499	0.351569	0.00954485	0.922172	0.970208		642.186	0.199847	0.342104	0.317684	0.573003	0.915914					390.571	-0.236556	0.299386	0.630722	0.427091	0.812494		728.329	-0.485532	0.250497	3.61629	0.0572162	1
ENSMUSG00000000869	Il4	36.5478	-0.951576	0.968458	1.14711	0.284155	0.660136		46.5267	1.00252	0.48515	4.27916	0.0385825	0.180164		39.312	-0.923178	0.6585	2.10356	0.146957	0.620977					45.4534	-0.255213	0.296464	0.756508	0.384424	NA		37.0676	0.304378	0.538066	0.322447	0.570141	1
ENSMUSG00000000876	Pxmp4	145.324	0.73761	0.517273	1.97228	0.160206	0.530076		230.294	0.272844	0.28531	0.908419	0.340534	0.609797		192.87	0.827275	0.379213	4.73464	0.029561	0.314907					206.542	-0.155527	0.226481	0.479194	0.488788	0.842937		246.469	0.268741	0.333257	0.663003	0.415502	1
ENSMUSG00000000881	Dlg3	18.6661	-1.45125	1.19503	1.38632	0.239028	0.619689		31.4457	-1.22079	0.646429	3.43677	0.0637603	0.242272		39.4164	0.820968	0.676896	1.62549	0.202328	0.69033					19.4802	-0.154102	0.547712	0.0803517	0.776821	NA		54.6265	0.154662	0.5195	0.0898902	0.764317	1
ENSMUSG00000000884	Gnb1l	11.3201	-0.768097	1.59529	0.242316	0.622539	0.873153		18.301	-1.08449	0.604943	3.10641	0.0779848	0.270634		20.0298	0.182251	0.642701	0.0706228	0.790432	0.969495					14.9423	-0.175756	0.542937	0.08189	0.774752	NA		26.9706	0.476516	0.560991	0.737612	0.390427	1
ENSMUSG00000000901	Mmp11	2.10063	5.67143	4.55286	1.48166	0.223515	NA		3.08981	-3.68943	1.57709	5.14055	0.0233732	NA		3.05478	3.73331	2.28043	1.57617	0.209314	NA					1.05157	-0.93383	1.67107	0.225568	0.63483	NA		3.24119	-1.18677	1.46313	0.606711	0.436029	1
ENSMUSG00000000902	Smarcb1	92.6014	0.400783	0.758425	0.281777	0.595539	0.862055		88.2391	0.161329	0.317318	0.255278	0.613383	0.814432		91.0761	0.191477	0.468772	0.180524	0.670923	0.937504					76.2853	-0.0274688	0.26075	0.0112289	0.915609	NA		130.416	0.162223	0.302543	0.291271	0.589407	1
ENSMUSG00000000903	Vpreb3	344.833	0.481705	0.528765	0.877973	0.348758	0.716555		361.73	-0.859593	0.345997	5.90589	0.0150904	0.0996406		447.964	0.664548	0.336765	3.83678	0.0501397	0.39984					232.351	-0.16998	0.334103	0.255643	0.613129	0.902347		511.175	-0.306606	0.259821	1.35806	0.243873	1
ENSMUSG00000000915	Hip1r	193.833	0.504445	0.586682	0.760012	0.383325	0.74325		227.008	-0.159452	0.22004	0.516992	0.472128	0.718606		255.319	0.591199	0.367806	2.63477	0.104547	0.543299					166.217	-0.218847	0.247633	0.795758	0.372365	0.782547		347.036	-0.330394	0.256745	1.61946	0.203167	1
ENSMUSG00000000916	Nsun5	2.02051	-4.91147	5.26667	1.17285	0.278816	NA		4.83386	-1.13962	0.917154	1.52097	0.217473	0.484729		6.19186	0.569624	1.42661	0.239799	0.624351	0.927253					2.49536	-1.14906	0.845847	1.5118	0.218865	NA		6.6149	-0.637507	1.02793	0.371889	0.541976	1
ENSMUSG00000000934	Top1mt	8.1939	-0.964844	2.29645	0.251392	0.616097	0.870672		10.9289	-0.483302	0.899114	0.323295	0.569634	0.782907		9.58054	-0.47815	1.04825	0.241793	0.622914	0.926673					9.15265	0.10516	0.694669	0.0204463	0.886298	NA		9.63782	0.29853	0.751824	0.162114	0.687217	1
ENSMUSG00000000957	Mmp14	25.2975	0.372563	1.39393	0.0899037	0.7643	0.929272		36.0152	-1.14941	0.614046	3.0265	0.0819148	0.278812		46.6205	2.37191	0.970068	5.90639	0.0150861	0.228203					18.9614	0.155435	0.479413	0.103671	0.747467	NA		49.9481	-0.147649	0.70318	0.0437611	0.834299	1
ENSMUSG00000000959	Oxa1l	112.104	1.6077	0.578173	6.60069	0.0101939	0.132337		104.564	0.112022	0.284753	0.15405	0.694695	0.858597		105.355	0.755447	0.423883	3.08999	0.0787755	0.48679					87.3563	-0.0980765	0.272931	0.13125	0.71714	NA		145.105	-0.0413435	0.32964	0.0157626	0.900089	1
ENSMUSG00000000976	Heatr6	59.7632	1.19591	0.806829	1.96631	0.16084	0.530164		69.869	0.797774	0.48747	2.54323	0.110768	0.332881		55.6048	0.339945	0.627064	0.316547	0.57369	0.915914					56.987	-0.585863	0.288428	4.15183	0.0415896	NA		72.866	-0.46033	0.547315	0.686494	0.40736	1
ENSMUSG00000000982	Ccl3	15.8813	0.352745	1.34103	0.079053	0.778585	0.935021		14.3211	-2.23991	0.767823	7.92452	0.00487692	0.0468217		21.7591	0.649602	0.724637	0.81406	0.366923	0.817525	B				10.9664	1.10256	0.616118	2.77258	0.0958917	NA		32.7377	0.832467	0.502604	2.86473	0.0905407	1
ENSMUSG00000000983	Wfdc18	4.45432	5.104	2.85656	2.24699	0.133875	NA		8.84112	-1.49244	0.976304	2.08206	0.149039	0.394594		11.41	4.54531	1.57018	8.29742	0.00397014	0.116725					7.03071	1.25513	0.717518	2.75973	0.0966645	NA		11.4398	-1.49856	1.10179	1.65825	0.19784	1
ENSMUSG00000001016	Ilf2	38.1829	0.26016	1.07311	0.0487581	0.825238	0.954451		22.8725	1.03296	0.465729	4.75507	0.0292121	0.150471		33.8424	-0.865102	0.56133	2.52868	0.111794	0.562338					22.7123	-0.142426	0.388997	0.131308	0.717079	NA		26.5289	0.303293	0.510328	0.361453	0.5477	1
ENSMUSG00000001017	Chtop	345.897	-0.120897	0.434691	0.0799428	0.777375	0.93428		412.897	0.168115	0.195116	0.744118	0.388345	0.65225		442.525	-0.0109235	0.296897	0.00137212	0.970451	0.996905					346.662	-0.180102	0.146808	1.51833	0.217872	0.661312		516.878	-0.0646749	0.230329	0.0784016	0.779475	1
ENSMUSG00000001018	Snapin	18.1545	0.808961	1.33352	0.31578	0.574155	0.853832		29.0277	-1.1596	0.431075	7.05028	0.00792529	0.0645909		38.9493	1.24547	0.654061	2.77975	0.0954634	0.524348					19.1694	0.242841	0.328913	0.551297	0.457788	NA		47.1548	-0.320213	0.498509	0.404424	0.524813	1
ENSMUSG00000001020	S100a4	4551.73	0.717122	0.589338	1.23615	0.266215	0.645172		3375.35	-0.0958032	0.43186	0.0487909	0.825181	0.92448		4329.09	-0.0441411	0.574994	0.0058742	0.938907	0.993313					3908.68	0.71363	0.29391	5.51687	0.0188339	0.300158		6263.15	0.770994	0.432638	3.33339	0.0678869	1
ENSMUSG00000001021	S100a3	6.54741	6.73651	3.61265	2.09458	0.147822	NA		6.71178	-2.16402	1.31068	2.31166	0.128407	0.36223		6.34486	6.2372	2.18159	7.30298	0.00688405	0.154975					5.10107	-0.414463	1.05759	0.0571054	0.811131	NA		9.0227	0.310991	1.32909	0.0553301	0.814035	1
ENSMUSG00000001025	S100a6	5900.05	0.184821	0.35235	0.269502	0.603666	0.864775		8506.17	-0.190905	0.349865	0.284673	0.593655	0.800716		9676.08	0.785444	0.400058	4.13881	0.0419106	0.370001					8253.73	0.521204	0.249518	4.07939	0.0434093	0.383205		11574.5	0.0136334	0.426576	0.00102334	0.97448	1
ENSMUSG00000001027	Scn4a	10.2928	7.74158	2.49904	7.86186	0.00504884	0.0901853		6.43249	-2.12834	1.16491	3.07665	0.0794241	0.273568		10.9588	4.77817	1.69233	5.78496	0.0161638	0.2362					5.21925	1.34015	0.894322	1.98292	0.159083	NA		13.5105	-0.373801	1.05402	0.122516	0.726322	1
ENSMUSG00000001029	Icam2	218.08	-0.212782	0.730691	0.100657	0.751043	0.923901		248.659	-0.184537	0.309697	0.347298	0.555647	0.774453		302.679	0.108334	0.432468	0.0662809	0.796831	0.969774					186.146	-0.168204	0.243589	0.470174	0.492907	0.844933		355.782	0.00311742	0.248557	0.000157645	0.989982	1
ENSMUSG00000001036	Epn2	10.4371	-3.80723	1.76783	5.88889	0.0152367	0.166366		7.63059	0.0994989	0.820024	0.0141986	0.90515	0.961495		13.8895	-1.3361	0.938105	2.55511	0.109938	0.557932					4.5357	-0.968318	0.819779	1.40129	0.236508	NA		8.42948	0.10495	0.884128	0.0141447	0.90533	1
ENSMUSG00000001052	Sec24b	82.5935	0.571012	0.64534	0.794011	0.37289	0.735418		85.7844	-0.098225	0.402901	0.0601909	0.806195	0.915595		100.119	0.204119	0.374757	0.280479	0.596387	0.920733					72.5681	0.113358	0.301653	0.133471	0.71486	NA		124.572	0.0344101	0.260766	0.0174998	0.894757	1
ENSMUSG00000001053	N4bp3	14.2591	4.59457	1.62639	5.5912	0.0180509	0.184724		27.9924	-0.373701	0.555775	0.436495	0.508819	0.742788		28.1558	3.89159	0.897534	14.4656	0.000142744	0.0164776	F				18.4492	-0.278085	0.686504	0.168894	0.681097	NA		35.3734	-0.382116	0.703325	0.286221	0.592652	1
ENSMUSG00000001054	Rmnd5b	8.76635	2.5996	2.0475	1.57532	0.209436	0.588646		7.61869	-1.27345	0.845402	2.12902	0.144533	0.388469		7.3837	1.30054	1.13483	1.35372	0.244629	0.729695					7.94307	0.730565	0.590604	1.43072	0.231647	NA		14.6477	-0.0322293	0.675206	0.00228616	0.961865	1
ENSMUSG00000001056	Nhp2	94.0655	-0.177014	0.729428	0.0619399	0.803456	0.945483		91.6923	-0.680006	0.367523	3.22566	0.0724924	0.26014		125.183	0.162669	0.482543	0.12432	0.724395	0.953048					62.8841	-0.164316	0.245669	0.443036	0.505661	NA		133.242	-0.298462	0.365538	0.653877	0.41873	1
ENSMUSG00000001062	Vps9d1	14.1426	0.0597381	1.58237	0.00151678	0.968934	0.992386		16.0002	-0.853227	0.660377	1.63009	0.201691	0.464156		20.1027	0.211467	0.823002	0.0618997	0.803518	0.971112					14.88	0.333049	0.486477	0.421066	0.516406	NA		21.5536	-0.666594	0.625697	1.0905	0.296361	1
ENSMUSG00000001065	Zfp276	3.14956	5.45022	3.6477	1.89408	0.168743	NA		5.38807	1.57166	1.14561	1.92453	0.165358	0.416264		2.8102	2.44127	1.99457	1.18442	0.276458	NA				ZFP276	4.62532	-1.35048	0.837949	2.31112	0.128451	NA		4.19989	0.35954	1.17354	0.0951905	0.757679	1
ENSMUSG00000001082	Mfsd10	85.8583	-0.44965	0.762916	0.351665	0.553172	0.844394		72.4789	-0.716636	0.432926	2.71483	0.0994195	0.312015		107.449	-0.19686	0.556444	0.128693	0.719791	0.952303					61.8905	0.464402	0.331933	1.81104	0.178384	NA		130.538	-0.0915931	0.480721	0.0361741	0.849156	1
ENSMUSG00000001089	Luzp1	28.7804	0.712336	1.43596	0.276491	0.59901	0.863335		26.2222	0.486749	0.436255	1.24114	0.265251	0.538012		26.23	0.0132506	0.734595	0.000348234	0.985112	0.998163					26.15	0.331103	0.400973	0.681015	0.409237	NA		28.362	-0.388635	0.558444	0.474055	0.491127	1
ENSMUSG00000001095	Slc13a2	28.6435	4.54824	1.14943	12.3848	0.000432839	0.0196773		77.1265	-0.869626	0.535942	2.36977	0.123706	0.35437		73.2805	4.33417	0.570924	56.8975	4.59118e-14	3.23288e-10	D				51.2034	-0.305748	0.389629	0.607831	0.435606	NA		77.4908	-0.579539	0.479159	1.40392	0.236068	1
ENSMUSG00000001098	Kctd10	9.1204	-3.15968	2.27714	2.93666	0.0865896	0.40247		3.28364	0.384212	1.38251	0.0781563	0.779812	NA		6.11822	-2.38331	1.83433	2.15222	0.142363	0.615149					3.54398	0.0227969	0.984728	0.000434836	0.983363	NA		2.43538	1.47667	1.44273	1.11823	0.290299	1
ENSMUSG00000001100	Poldip2	66.1767	1.91015	0.893185	3.35907	0.066836	0.359804		58.2598	-0.66634	0.439372	2.20778	0.137317	0.377661		83.4177	1.02095	0.541053	2.8522	0.091249	0.516242					41.1118	0.140652	0.363275	0.146245	0.70215	NA		82.5038	-0.352082	0.412499	0.711863	0.398826	1
ENSMUSG00000001105	Ift20	1762.26	0.532681	0.526807	0.859523	0.353872	0.721358		2398.08	-0.190042	0.401435	0.227901	0.633085	0.824251		2635.98	0.383528	0.581493	0.328103	0.566778	0.912811					2348.6	0.328171	0.284761	1.30677	0.25298	0.694034		3588.5	0.927212	0.439456	4.66055	0.0308633	1
ENSMUSG00000001119	Col6a1	5.71999	1.01789	2.54607	0.192452	0.660884	NA		5.27613	-2.31873	1.36062	2.61323	0.105975	0.325064		9.13867	1.83719	1.55876	1.35203	0.244924	0.729695					1.2384	-0.290036	1.43252	0.0738614	0.785795	NA		7.81732	-1.35969	1.37401	0.877319	0.348937	1
ENSMUSG00000001120	Pcbp3	11.7088	-1.70658	1.57534	1.48375	0.223188	0.604817		7.17174	-0.265521	0.728176	0.148741	0.699742	0.861059		10.0654	0.199754	1.08636	0.038669	0.844106	0.974417					7.06545	0.545557	0.699357	0.493065	0.482563	NA		13.7263	-1.01025	0.798788	1.53515	0.215341	1
ENSMUSG00000001123	Lgals9	648.397	-2.07378	0.671365	12.2228	0.000472101	0.020619		394.859	-1.16123	0.258738	19.4357	1.04046e-05	0.000404966		861.349	-0.971646	0.387783	7.11446	0.00764645	0.162346	C				228.322	0.308467	0.21773	1.99691	0.157621	0.601638		679.576	-0.03774	0.272642	0.0191177	0.89003	1
ENSMUSG00000001127	Araf	82.5892	0.353757	0.80345	0.210903	0.64606	0.883156		91.7844	-0.249032	0.253512	0.94817	0.330186	0.600634		115.165	0.392287	0.431146	0.81204	0.367518	0.817525		ENSMUSG00000001127			74.017	0.156628	0.222487	0.485689	0.485857	NA		137.256	-0.0936716	0.232513	0.161227	0.688029	1
ENSMUSG00000001128	Cfp	147.448	-1.35861	0.541481	7.11915	0.00762647	0.111029		108.089	0.106549	0.379628	0.0798752	0.777467	0.902636		176.77	-0.910129	0.390868	6.06576	0.0137828	0.217848					109.127	0.606233	0.297805	4.06017	0.043906	NA		166.554	0.24392	0.327772	0.563374	0.452904	1
ENSMUSG00000001134	Uxt	45.209	0.757304	0.790915	0.856484	0.354725	0.722265		50.5958	0.387188	0.35608	1.20214	0.272893	0.546052		47.6276	-0.214231	0.54353	0.133365	0.714968	0.951116			UXT		77.4324	0.782807	0.352282	4.76055	0.0291192	NA		65.9228	0.466032	0.383506	1.5034	0.220149	1
ENSMUSG00000001138	Cnnm3	82.9581	-1.10492	0.881333	1.94266	0.16338	0.534931		89.3265	0.362839	0.407378	0.771398	0.379785	0.645876		103.635	-0.550132	0.513896	1.3528	0.244789	0.729695					75.6899	-0.15037	0.330741	0.207127	0.649029	NA		109.056	-0.20423	0.380961	0.283641	0.594324	1
ENSMUSG00000001143	Lman2l	46.9305	4.05431	1.58468	3.24373	0.0716973	0.372625		41.3472	0.555057	0.501896	1.24589	0.264338	0.536689		45.6094	0.772236	1.0141	0.290917	0.589634	0.919184					36.398	-0.427349	0.36261	1.38571	0.239131	NA		41.4175	0.00305786	0.485794	3.96829e-05	0.994974	1
ENSMUSG00000001150	Mcm3ap	99.4896	-1.02656	0.807636	1.96896	0.160559	0.530164		111.736	0.0486106	0.281774	0.0298053	0.862933	0.9413		144.283	-0.266847	0.503013	0.303092	0.58195	0.916888					85.2218	-0.223949	0.264344	0.673359	0.411883	NA		135.223	-0.49181	0.360743	1.79841	0.179905	1
ENSMUSG00000001151	Pcnt	72.8002	0.0890321	0.831558	0.0130784	0.908952	0.977617		103.51	-0.0226147	0.304171	0.00563354	0.940169	0.977864		113.693	0.547354	0.459374	1.37579	0.24082	0.726523					83.595	0.0633035	0.269279	0.055194	0.81426	NA		133.143	-0.506096	0.385939	1.65438	0.198364	1
ENSMUSG00000001156	Mxd1	1557.55	-1.03991	0.57563	3.941	0.0471227	0.302183		2110.46	0.76575	0.264502	8.53083	0.0034918	0.0372209		1890.69	-0.689808	0.395759	3.32138	0.0683843	0.456275	B				2358.46	0.134957	0.195956	0.468965	0.493464	0.845184		1931.65	0.157546	0.276712	0.327865	0.566919	1
ENSMUSG00000001157	Gmcl1	119.79	-1.10229	0.621959	3.54446	0.0597445	0.339156		122.935	-0.0560208	0.331842	0.0281683	0.866714	0.943142		160.505	-0.280566	0.483422	0.385599	0.534622	0.903369					106.839	0.153645	0.234583	0.423173	0.515358	NA		159.09	-0.246749	0.36224	0.457146	0.498961	1
ENSMUSG00000001158	Snrnp27	335.362	0.705131	0.806488	0.532322	0.465632	0.795686		579.764	1.09101	0.26836	16.6315	4.53916e-05	0.00137329		341.746	-0.143835	0.543911	0.0582275	0.80932	0.971716	B				630.282	-0.192996	0.237403	0.666531	0.414264	0.807871		409.426	0.40776	0.310771	1.76301	0.18425	1
ENSMUSG00000001166	Oas1c	37.8397	0.464414	0.892668	0.242805	0.622188	0.873024		31.7845	0.0589728	0.560795	0.011217	0.915653	0.967031		41.2905	-0.168985	0.818566	0.0386872	0.84407	0.974417					28.0042	0.0728785	0.343152	0.0449009	0.832186	NA		52.3417	0.447899	0.599552	0.575162	0.448215	1
ENSMUSG00000001173	Ocrl	15.05	-1.92057	1.36573	1.92374	0.165445	0.53774		12.7199	-0.444652	0.645193	0.442347	0.505992	0.740704		21.0347	-0.516453	0.661044	0.670587	0.412847	0.843651					10.9511	0.725022	0.547618	1.71358	0.190522	NA		21.9946	0.480763	0.589325	0.680969	0.409253	1
ENSMUSG00000001175	Calm1	2874.54	0.156428	0.427895	0.123789	0.724961	0.91266		2951.21	0.472531	0.191617	6.11535	0.0134013	0.092766		3238.34	-0.268675	0.33248	0.613524	0.433464	0.853162		ENSMUSG00000001175		CALM1	2852.84	0.0863008	0.147767	0.34186	0.558757	0.878602		3679.52	0.449021	0.289015	2.47744	0.11549	1
ENSMUSG00000001211	Agpat3	111.844	0.563928	0.655548	0.743795	0.388448	0.747025		137.871	-0.255575	0.349324	0.520122	0.47079	0.717823		167.559	0.709328	0.406842	2.91808	0.087592	0.507011					97.1001	-0.207735	0.280965	0.561093	0.45382	NA		180.424	-0.299208	0.327986	0.816384	0.366239	1
ENSMUSG00000001227	Sema6b	12.175	-0.127094	2.17345	0.00431247	0.947641	0.987096		10.5652	1.12654	1.06159	1.0161	0.313447	0.584939		11.1216	-1.30723	1.48257	0.942392	0.331663	0.79154					23.5119	1.60958	0.588084	6.51057	0.0107235	NA		7.85623	0.664571	1.07594	0.402423	0.525841	1
ENSMUSG00000001228	Uhrf1	22.801	5.54869	1.80984	4.96448	0.0258731	0.222036		47.0479	2.03611	0.495671	16.8426	4.06109e-05	0.00125233		12.4906	2.11864	1.11207	2.34391	0.125774	0.591255	B				53.9597	-0.381596	0.325984	1.39957	0.236795	NA		17.2867	0.146992	0.645422	0.0524838	0.818796	1
ENSMUSG00000001229	Dpp9	47.6219	0.0116772	0.805534	0.000220838	0.988143	0.998018		63.111	-0.501052	0.390217	1.64081	0.200215	0.462175		73.7373	0.584749	0.44852	1.73594	0.187654	0.673138					60.5205	0.505908	0.275594	3.13451	0.0766512	NA		96.9858	-0.357497	0.345415	1.05003	0.305499	1
ENSMUSG00000001240	Ramp2	3.08613	6.65509	3.62448	2.95957	0.0853706	NA		3.13716	-2.13437	1.25554	2.60398	0.106596	NA		4.60091	5.06084	1.68492	8.73004	0.0031301	0.103279					1.92303	0.955802	1.19564	0.658785	0.416989	NA		4.60394	-1.28844	1.25178	0.937289	0.332976	1
ENSMUSG00000001247	Lsr	2.08716	-0.713713	3.68115	0.0724915	0.787743	NA		2.91773	-2.07872	1.38646	2.12736	0.144689	NA		4.21162	1.47235	1.58196	0.939406	0.332431	0.792041					1.34035	-0.30553	1.43095	0.0388452	0.843756	NA		5.53268	0.120956	1.0419	0.0135136	0.907456	1
ENSMUSG00000001248	Gramd1a	116.385	0.626362	0.57682	1.06282	0.302573	0.67583		87.7399	0.414816	0.383417	1.13815	0.286045	0.559962		103.581	-0.335364	0.461625	0.569414	0.450492	0.861165					92.5804	0.301842	0.301813	0.932524	0.334208	NA		115.47	-0.196299	0.397429	0.241118	0.6234	1
ENSMUSG00000001249	Hpn	1.46703	-5.47659	5.57487	0.336339	0.56195	NA		2.00092	0.327876	1.59664	0.0699237	0.791448	NA		2.978	0.340364	2.69742	0.00968231	0.921616	NA					1.63224	0.604384	1.3359	0.142297	0.706008	NA		2.13498	-0.658367	1.85248	0.119829	0.72922	1
ENSMUSG00000001270	Ckb	128.503	1.20442	0.740825	2.30244	0.129171	0.484104		100.275	0.731162	0.385976	3.63937	0.0564283	0.225291		108.247	-0.41444	0.554151	0.504611	0.477481	0.875672					97.2183	-0.3332	0.337131	0.964646	0.326019	NA		139.251	0.240428	0.432228	0.311642	0.576674	1
ENSMUSG00000001280	Sp1	952.326	0.567867	0.397044	2.00297	0.156991	0.526851		1056.5	-0.404936	0.25586	2.46159	0.116661	0.342465		1303.05	0.567795	0.377329	2.12318	0.145085	0.618142				SP1	821.592	0.0685493	0.158615	0.182079	0.669592	0.919714		1447.73	-0.801963	0.291207	7.07585	0.00781297	1
ENSMUSG00000001281	Itgb7	302.436	0.0414386	0.457744	0.00855456	0.926308	0.982487		303.421	-0.209792	0.278219	0.573799	0.448753	0.701757		363.47	0.0172509	0.429135	0.00163307	0.967765	0.996905					262.094	0.184843	0.225428	0.666058	0.414429	0.807871		512.713	0.317274	0.312943	1.05225	0.304989	1
ENSMUSG00000001285	Myg1	65.4835	-0.910655	0.850597	1.36804	0.242149	0.621854		60.8198	-0.839519	0.401769	4.25553	0.0391228	0.181686		82.7237	-0.443453	0.468663	0.985131	0.320935	0.784948					42.158	-0.262201	0.384969	0.448001	0.503286	NA		83.5472	-0.578221	0.341372	2.77449	0.0957773	1
ENSMUSG00000001288	Rarg	165.429	2.61911	0.938721	4.75518	0.0292103	0.237193		203.042	0.416655	0.440414	0.894634	0.344225	0.612382		159.369	1.18612	0.795256	1.55138	0.212931	0.701802					156.449	-0.69184	0.34584	4.15172	0.0415924	0.378705		204.797	-0.279915	0.627025	0.194139	0.659494	1
ENSMUSG00000001289	Pfdn5	2545.32	0.800929	0.57333	1.54821	0.2134	0.594417		2720.24	0.404657	0.261217	2.43029	0.119011	0.346167		2696.24	-0.0441973	0.46464	0.00767528	0.930188	0.991872					2708.19	0.0495934	0.171865	0.0827712	0.773577	0.94812		3271.43	0.66052	0.345231	3.79956	0.0512659	1
ENSMUSG00000001300	Efnb2	3.9872	6.89262	4.07132	2.08417	0.148833	NA		6.71683	-0.217523	1.2801	0.0284067	0.866156	0.942923		5.152	5.22834	1.835	6.43543	0.0111866	0.194976					4.42398	-1.7258	1.20608	1.36968	0.241866	NA		6.83371	0.560783	1.36714	0.164253	0.68527	1
ENSMUSG00000001305	Rrp15	32.1311	3.32362	1.12068	6.10545	0.0134766	0.155037		31.0695	0.187067	0.422824	0.194097	0.659529	0.839093		33.6234	1.3711	0.711652	2.49429	0.11426	0.567318					25.3695	-0.177796	0.347352	0.266732	0.605532	NA		55.213	0.631764	0.34693	3.43694	0.0637539	1
ENSMUSG00000001313	Rnd2	7.19167	8.42015	2.87245	6.30356	0.0120496	NA		7.57643	-0.689131	0.934544	0.555713	0.455993	0.706479		8.31207	4.76114	1.60265	6.17302	0.0129713	0.21251					4.28021	-1.20969	0.963613	1.15886	0.281702	NA		10.3525	0.793618	0.925552	0.757836	0.384007	1
ENSMUSG00000001323	Srr	16.7179	0.257892	1.94685	0.0201071	0.887238	0.972071		29.1872	-0.337805	0.482168	0.495076	0.481672	0.724009		31.4937	0.946863	0.911531	1.00342	0.316484	0.782762					22.1975	-0.0577832	0.492542	0.0137427	0.906678	NA		35.0069	-0.281473	0.541368	0.26551	0.60636	1
ENSMUSG00000001348	Acp5	370.328	-0.0967383	0.460985	0.0470711	0.82824	0.955692		309.156	-0.127153	0.356946	0.126481	0.722109	0.872453		396.83	-0.23339	0.321495	0.575957	0.447901	0.859372					275.473	0.284559	0.251849	1.2254	0.268303	0.709354		432.765	0.0141792	0.278379	0.00259626	0.959363	1
ENSMUSG00000001349	Cnn1	25.3405	4.4147	1.90604	2.59626	0.107116	0.446004		18.0627	-0.27275	0.737372	0.139333	0.708945	0.86644		24.4189	1.42224	1.10043	0.80885	0.368461	0.817967					16.5617	0.548843	0.766106	0.50101	0.479057	NA		24.7793	0.149924	0.578488	0.0662206	0.796921	1
ENSMUSG00000001366	Fbxo9	10019.6	1.66453	0.449271	11.6726	0.000634265	0.0252652		14812.3	0.964981	0.304966	10.1764	0.00142248	0.0198307		8881.24	0.225982	0.459309	0.196394	0.657647	0.935599	C				14664.5	-0.377897	0.207307	3.40962	0.0648173	0.441544		9820	0.059592	0.323278	0.0341228	0.853446	1
ENSMUSG00000001376	Vps50	45.5712	-0.931059	0.806848	1.50047	0.2206	0.601859		46.6517	-0.675661	0.491016	1.84079	0.174858	0.429569		70.7545	0.100272	0.66014	0.0258798	0.872194	0.981089					38.7527	0.514001	0.311901	2.62555	0.105156	NA		76.4959	-0.0427382	0.593243	0.00515663	0.942753	1
ENSMUSG00000001380	Hars	67.4648	0.466491	0.748375	0.411065	0.52143	0.82748		83.1868	1.02203	0.314305	10.508	0.00118859	0.017484		57.4768	0.1035	0.489765	0.0490456	0.824732	0.973226	B				98.6334	0.192746	0.235456	0.666757	0.414184	NA		70.992	-0.0144696	0.303507	0.00227802	0.961933	1
ENSMUSG00000001383	Zmat2	4497.73	2.06705	0.667821	6.70714	0.00960278	0.12681		6750.24	1.01533	0.306006	11.1885	0.000823053	0.0131429		3378.15	0.349216	0.52157	0.366358	0.544996	0.906696	B				6997.45	-0.248193	0.244026	1.04556	0.306532	0.739882		4319.29	0.297149	0.395187	0.57373	0.448781	1
ENSMUSG00000001403	Ube2c	7651.17	0.900717	0.465311	3.15628	0.0756356	0.381337		12727.3	0.513273	0.294718	3.12641	0.0770333	0.269131		8813.68	0.280741	0.401496	0.397332	0.528471	0.901328					12136	-0.311498	0.216051	2.11985	0.145401	0.584648		10821	0.166945	0.31124	0.290301	0.590028	1
ENSMUSG00000001415	Smg5	71.2131	-0.51869	0.75443	0.525922	0.468326	0.797153		63.8212	0.227993	0.32134	0.507209	0.47635	0.720979		71.7623	-0.731771	0.486231	2.51312	0.112902	0.564631					83.861	0.630898	0.286912	4.60612	0.031858	NA		85.5625	0.0701232	0.357274	0.0387777	0.84389	1
ENSMUSG00000001416	Cct3	235.198	0.351449	0.57984	0.356287	0.550575	0.843224		244.968	0.0973364	0.261161	0.140152	0.70813	0.86576		259.728	-0.0032923	0.392847	6.6955e-05	0.993471	0.999459					217.21	0.0236122	0.168379	0.0193624	0.889333	0.972695		302.602	-0.0774811	0.312491	0.0611644	0.804665	1
ENSMUSG00000001418	Glmp	106.823	0.768095	0.640151	1.48149	0.223542	0.605469		116.012	0.304802	0.267344	1.30864	0.252641	0.524475		118.053	0.118446	0.41686	0.0768477	0.781616	0.968392					101.553	-0.180314	0.232086	0.616779	0.432247	NA		150.166	0.249789	0.29753	0.717718	0.396893	1
ENSMUSG00000001419	Mef2d	452.809	-0.83511	0.692193	1.78495	0.181543	0.557797		397.728	-0.298646	0.244359	1.479	0.223931	0.492268		560.957	-0.223734	0.487042	0.240791	0.623635	0.926933					278.619	-0.0630943	0.242905	0.0679311	0.794373	0.948967		500.753	-0.484834	0.337016	1.99194	0.158139	1
ENSMUSG00000001424	Snd1	266.219	1.19247	0.443439	6.50515	0.0107562	0.135466		311.892	0.0449215	0.300956	0.0221818	0.881605	0.95105		311.5	0.904036	0.386445	5.07262	0.0243066	0.284009					294.466	0.273294	0.230501	1.29956	0.254294	0.694034		460.403	-0.189136	0.305175	0.378659	0.538322	1
ENSMUSG00000001435	Col18a1	1.61205	1.4089	4.97913	0.036658	0.848163	NA		5.16052	0.882256	1.10067	0.645206	0.421832	0.67928		2.20261	2.42256	2.29324	1.32253	0.250138	NA					9.47386	0.515036	0.837796	0.335872	0.562222	NA		8.2914	-0.0532147	1.13137	0.00224479	0.962211	1
ENSMUSG00000001436	Slc19a1	21.4048	-0.651458	1.29732	0.309339	0.578086	0.855334		19.636	-0.559257	0.780584	0.512078	0.474241	0.720446		26.9935	-0.465894	0.750195	0.389005	0.532823	0.902324					13.2051	-0.328838	0.654549	0.24567	0.620141	NA		27.9099	-0.400739	0.639953	0.375675	0.539927	1
ENSMUSG00000001440	Kpnb1	158.337	-0.690892	0.602335	1.50398	0.220059	0.601859		153.999	0.146442	0.272735	0.289958	0.590248	0.798587		182.253	-0.273279	0.422592	0.461601	0.496877	0.888054					130.302	0.0642034	0.191491	0.112887	0.736881	0.940605		195.346	-0.0653642	0.293984	0.0492513	0.824371	1
ENSMUSG00000001441	Npepps	343.513	0.478906	0.46646	1.04567	0.306507	0.679897		371.985	0.491478	0.22472	4.80038	0.0284535	0.148248		374.786	-0.0687024	0.387804	0.0306068	0.86112	0.978838					349.318	-0.0882304	0.200929	0.191954	0.661295	0.915094		411.955	-0.00817805	0.312126	0.000686023	0.979104	1
ENSMUSG00000001444	Tbx21	70.2474	-0.320444	0.643924	0.251419	0.616078	0.870672		100.078	0.3805	0.364479	1.0732	0.300223	0.573047		79.9681	-0.0117431	0.46361	0.000699187	0.978905	0.997964					74.3753	-0.832582	0.30457	7.7045	0.00550835	NA		131.254	0.00109106	0.391148	7.78907e-06	0.997773	1
ENSMUSG00000001445	Mrpl10	133.16	-1.17632	0.775229	2.81548	0.0933589	0.418916		122.997	-0.412793	0.214696	3.71351	0.0539738	0.21852		171.826	-0.495756	0.441545	1.41036	0.234996	0.721785					98.9327	0.0426215	0.185393	0.0520883	0.819468	NA		177.75	-0.034273	0.222548	0.0236652	0.87774	1
ENSMUSG00000001467	Cyp51	135.912	0.145039	0.567023	0.0692453	0.792439	0.942164		171.517	-0.109833	0.386191	0.0783146	0.779594	0.903649		193.293	0.70812	0.485602	2.26675	0.132177	0.601136					150.05	0.334722	0.297245	1.2337	0.266688	0.707864		251.206	0.527528	0.376382	2.0364	0.153573	1
ENSMUSG00000001472	Tcf25	725.806	-0.82577	0.464176	3.57322	0.0587185	0.336017		678.795	0.133637	0.166067	0.651078	0.419728	0.678022		864.783	-0.629049	0.305324	4.549	0.032938	0.331196					612.758	0.042825	0.177065	0.0588548	0.808315	0.949673		902.262	0.0358394	0.195635	0.0336396	0.854475	1
ENSMUSG00000001473	Tubb6	21.1947	0.165907	1.42846	0.0127861	0.90997	0.977687		27.8139	-0.212186	0.641893	0.106397	0.744284	0.883594		26.7817	0.358685	0.92111	0.159543	0.689578	0.943363		ENSMUSG00000001473		TUBB6	28.9251	0.115943	0.539129	0.0368174	0.847837	NA		33.0222	0.253427	0.68865	0.138313	0.709964	1
ENSMUSG00000001482	Def8	108.631	2.45928	0.581822	14.696	0.000126313	0.00830473		124.135	0.211535	0.322416	0.423537	0.515177	0.747682		116.386	1.32855	0.389568	9.82163	0.00172472	0.0736035	A				111.369	-0.0223577	0.250115	0.00801379	0.928669	NA		133.54	-0.0566104	0.324564	0.0303188	0.861769	1
ENSMUSG00000001497	Pax9	22.1263	0.282363	1.12542	0.0554769	0.813793	0.949176		33.4844	1.0929	0.613438	3.1658	0.0751957	0.265415		20.882	-0.785739	0.843221	0.76833	0.380734	0.827435					39.5454	-0.0170173	0.485879	0.0012087	0.972266	NA		17.3825	0.0790453	0.712912	0.0122349	0.911924	1
ENSMUSG00000001504	Irx2	4.46847	-4.54787	4.08461	0.414501	0.519694	NA		1.8114	-4.6716	2.73438	2.74292	0.0976862	NA		5.45044	0.88985	2.55642	0.0691926	0.792516	0.969495					0.985149	2.45456	2.30445	1.0843	0.297737	NA		3.1263	-1.80718	2.22511	0.578162	0.447034	1
ENSMUSG00000001506	Col1a1	242.002	1.80679	2.54659	0.193183	0.660281	0.889015		75.258	-3.89272	1.18965	7.32606	0.00679617	0.0584828		159.532	1.02119	1.70992	0.305382	0.580528	0.916888					7.3441	-1.01961	0.831053	1.38175	0.239804	NA		128.786	-0.594545	1.30018	0.160903	0.688327	1
ENSMUSG00000001507	Itga3	7.81449	-0.661236	2.32964	0.114664	0.734896	0.917617		5.39944	-0.867645	0.951487	0.784846	0.375663	0.641897		6.47464	-0.438196	1.26893	0.145179	0.703186	0.948885					7.75318	0.883358	0.819121	0.804222	0.369834	NA		5.55308	0.352263	1.0306	0.117687	0.731556	1
ENSMUSG00000001510	Dlx3	0.652938	3.75481	5.82123	0.445139	0.504653	NA		1.72962	5.04009	2.96654	2.77615	0.0956781	NA		0	NA	NA	NA	NA	NA					1.53038	-1.01045	1.89683	0.376621	0.539417	NA		0.684886	3.68513	3.81243	1.42126	0.233196	1
ENSMUSG00000001517	Foxm1	18.2618	6.49198	2.454	5.05647	0.0245341	0.216314		29.0333	1.97247	0.561643	12.2057	0.000476437	0.00876266		7.18081	3.88202	1.45981	5.65385	0.0174171	0.243771	B				31.2461	-0.393638	0.471925	0.701477	0.402288	NA		11.8125	0.177448	1.04193	0.0278166	0.867541	1
ENSMUSG00000001518	Itfg2	26.3091	-0.515989	1.11407	0.229826	0.631653	0.87752		20.721	-0.281589	0.469547	0.356005	0.550733	0.771737		35.3854	-0.238598	0.564902	0.176213	0.674648	0.937825					15.4837	0.684803	0.609311	1.14369	0.284874	NA		38.0502	-0.223451	0.409734	0.293321	0.5881	1
ENSMUSG00000001521	Tulp3	11.3489	0.0854771	1.56102	0.00360273	0.952138	0.988439		16.3143	-0.092898	0.715733	0.0175637	0.894567	0.955833		17.2713	0.124616	0.982014	0.0131796	0.908602	0.988172					13.9295	0.171879	0.516666	0.109882	0.740279	NA		19.473	-0.530685	0.792303	0.431935	0.511041	1
ENSMUSG00000001524	Gtf2h4	19.0434	-0.402283	1.38546	0.103642	0.747502	0.922753		19.888	-0.0338922	0.591501	0.00312554	0.955416	0.984908		24.084	-0.0655785	0.775037	0.0080863	0.928348	0.991872					18.3884	0.232411	0.379577	0.349985	0.554122	NA		27.8867	-0.14036	0.500091	0.0781043	0.779883	1
ENSMUSG00000001525	Tubb5	1262.75	-0.49244	0.397522	1.6763	0.195416	0.572531		1325.89	0.250869	0.227005	1.21587	0.270172	0.542719		1514.71	-0.279169	0.309556	0.875994	0.349301	0.807839		ENSMUSG00000001525			1160.07	0.0135435	0.182339	0.00548337	0.940971	0.987352		1684.17	-0.0746283	0.258922	0.0826799	0.773698	1
ENSMUSG00000001542	Ell2	8547.04	2.55352	0.599674	12.2856	0.000456475	0.0201031		15570.4	2.31136	0.332858	46.5322	9.01241e-12	1.77791e-09		3883.83	-0.244682	0.533935	0.173621	0.676913	0.939186	C			ELL2	16498.3	-0.506106	0.19721	6.76612	0.00929044	0.224969		3647.7	-0.127533	0.386674	0.107606	0.742886	1
ENSMUSG00000001552	Jup	18.5398	-1.56013	1.44725	1.5186	0.217832	0.599564		35.7269	0.452039	0.613529	0.495384	0.481535	0.724005		29.0885	0.453643	0.948575	0.272656	0.601556	0.921928					26.6479	-0.648799	0.475836	1.74066	0.187055	NA		38.1138	0.685229	0.654122	1.14857	0.283848	1
ENSMUSG00000001569	Nom1	45.3055	0.0196787	0.813191	0.000543472	0.981401	0.996306		54.2968	-0.00580686	0.334017	0.000302047	0.986134	0.997126		61.8107	0.266277	0.467209	0.309377	0.578063	0.916676					46.7861	0.0682631	0.283335	0.0587646	0.808459	NA		78.3882	0.0203842	0.369018	0.00306522	0.955848	1
ENSMUSG00000001576	Ergic1	428.281	-1.14736	0.490349	6.1503	0.013139	0.1523		590.961	-0.701362	0.330493	4.40309	0.0358739	0.171749		763.941	0.0108279	0.423393	0.000610639	0.980285	0.997964					405.601	-0.255318	0.245182	1.11319	0.291389	0.731371		728.493	-0.52668	0.321102	2.57518	0.108552	1
ENSMUSG00000001588	Acap1	80.1221	1.07083	0.889368	1.15113	0.283312	0.659427		69.8974	-0.0224417	0.442736	0.00258175	0.959476	0.986552		85.144	0.350985	0.514181	0.406057	0.523978	0.901097					56.1489	-0.00968523	0.324002	0.000912898	0.975896	NA		108.15	0.0238735	0.315486	0.00572806	0.939671	1
ENSMUSG00000001604	Tcea3	14.381	-2.81598	1.6719	2.2038	0.137671	0.497806		10.7858	-1.28227	0.934494	1.88604	0.169649	0.422465		20.3985	-0.250252	0.815731	0.103592	0.74756	0.958073					3.03676	-1.49217	1.39515	1.51785	0.217946	NA		22.5548	0.186363	0.586048	0.101702	0.749797	1
ENSMUSG00000001627	Ifrd1	988.609	-1.4155	0.434106	12.2857	0.000456447	0.0201031		1336.92	-0.228599	0.315041	0.530992	0.46619	0.714061		1563.25	-0.382657	0.408054	0.875441	0.349453	0.807839	A				1192.86	0.0758182	0.236437	0.100697	0.750995	0.943465		1667.83	0.411128	0.397524	1.09452	0.295473	1
ENSMUSG00000001630	Stk38l	30.1581	-1.33508	1.26211	1.20255	0.272813	0.649088		26.2783	-0.334385	0.560303	0.331886	0.564551	0.780222		34.2855	-0.751144	0.544978	2.2395	0.134525	0.604648					21.8006	0.109251	0.394264	0.0749267	0.784294	NA		34.2285	0.29273	0.513281	0.329834	0.565757	1
ENSMUSG00000001632	Brpf1	152.032	0.754351	0.692397	1.27417	0.258986	0.636354		138.323	-0.00436253	0.308783	0.000200219	0.98871	0.998455		153.071	0.0815807	0.377199	0.0474598	0.827544	0.973226					137.42	0.281623	0.237205	1.33251	0.248358	0.694034		179.892	-0.194685	0.274589	0.4972	0.480733	1
ENSMUSG00000001642	Akr1b3	13.8957	-1.53308	1.4086	1.32396	0.249883	0.627348		8.8594	-0.540021	0.637634	0.69858	0.403261	0.665067		14.5272	-0.822004	0.738813	1.46152	0.226688	0.715703					7.1182	0.280688	0.505508	0.29398	0.587681	NA		14.4572	-0.0706781	0.791761	0.00792092	0.929082	1
ENSMUSG00000001663	Gstt1	73.3188	0.69651	3.01406	0.0213594	0.883804	0.970489		82.3284	-0.054539	0.470952	0.0135995	0.907164	0.96222		93.9333	-0.219736	1.52907	0.0121209	0.912334	0.988827					255.733	1.15303	0.634245	2.62036	0.1055	0.520666		173.431	-0.0821714	0.581111	0.0195252	0.888871	1
ENSMUSG00000001665	Gstt3	16.8361	-2.07992	1.4936	1.81897	0.177436	0.552549		24.7742	-1.99082	0.754632	6.22201	0.0126172	0.0885477		33.759	0.589513	0.84894	0.565927	0.451882	0.861261					15.8689	0.446276	0.561361	0.60577	0.436385	NA		26.1693	-1.36141	0.907001	2.00555	0.156724	1
ENSMUSG00000001666	Ddt	92.2311	0.981728	0.623975	2.32037	0.12769	0.481802		119.501	0.0990431	0.326424	0.0928837	0.760543	0.891656		108.72	0.659317	0.454009	2.05121	0.152085	0.62553					102.246	-0.220992	0.24385	0.838261	0.359895	NA		141.342	-0.0304393	0.345537	0.0077623	0.929794	1
ENSMUSG00000001672	Marveld3	9.54719	-3.30961	1.722	4.39286	0.0360897	0.264276		8.82716	-1.74237	1.00364	2.77688	0.0956345	0.304025		17.1474	0.818961	1.1857	0.52879	0.467116	0.871772					4.17497	0.516332	1.0677	0.236014	0.6271	NA		12.2249	-1.10615	0.864208	1.46738	0.22576	1
ENSMUSG00000001674	Ddx18	114.996	0.36085	0.586406	0.389372	0.53263	0.832923		94.6849	-0.389345	0.292104	1.76925	0.183475	0.44125		112.55	0.0550184	0.430594	0.0168925	0.896589	0.985505				DDX18	67.7556	-0.281395	0.277026	1.04762	0.306056	NA		151.305	0.14935	0.334531	0.201353	0.653631	1
ENSMUSG00000001687	Ubl3	725.993	-0.64222	0.428591	2.44489	0.117908	0.465579		607.626	-0.526954	0.210679	6.14768	0.0131585	0.0913671		854.006	-0.401742	0.309449	1.89173	0.169007	0.65042					484.957	0.0259549	0.199379	0.0166597	0.8973	0.974176		859.074	-0.0495205	0.21866	0.0511491	0.821076	1
ENSMUSG00000001700	Gramd3	357.822	-0.479821	0.423263	1.37182	0.241499	0.621236		348.904	-0.237382	0.307644	0.57378	0.448761	0.701757		472.453	-0.0355329	0.317256	0.0138413	0.906346	0.987167					294.716	0.228068	0.221344	1.0566	0.303991	0.73775		559.076	0.00163229	0.234153	4.86905e-05	0.994433	1
ENSMUSG00000001707	Eef1e1	27.2053	0.293012	1.10379	0.0715693	0.789065	0.940679		26.5428	-0.657833	0.623146	1.05277	0.30487	0.57784		37.4768	0.261635	0.539775	0.217301	0.641104	0.931159					22.1139	0.346936	0.550028	0.351075	0.553505	NA		43.0475	0.627156	0.410282	2.40685	0.120805	1
ENSMUSG00000001729	Akt1	855.077	-0.00355598	0.5708	4.34325e-05	0.994742	0.999275		718.086	-0.318884	0.239947	1.75343	0.185446	0.443991		888.358	-0.0156314	0.431271	0.00144693	0.969657	0.996905		ENSMUSG00000001729			633.516	0.306388	0.230884	1.69439	0.193024	0.641236		948.827	-0.64667	0.304082	4.28747	0.0383944	1
ENSMUSG00000001739	Cldn15	3.7537	-1.37893	3.20769	0.264004	0.607383	NA		5.93001	2.23464	0.936858	6.03583	0.0140184	0.0949571		3.35054	0.0986675	1.806	0.00544625	0.941171	NA					8.54149	0.888773	0.771702	1.17108	0.279179	NA		4.74483	0.42384	1.07752	0.161192	0.688062	1
ENSMUSG00000001741	Il16	934.84	-0.757711	0.516263	2.50421	0.113542	0.458556		909.353	-0.570833	0.297685	3.50451	0.061202	0.236673		1332.59	0.027339	0.490974	0.00355216	0.952474	0.995606					752.243	0.405185	0.185605	4.54069	0.0330982	0.350383		1491.82	0.143879	0.350465	0.170318	0.679829	1
ENSMUSG00000001750	Tcirg1	47.3365	1.95727	0.880164	4.07842	0.0434343	0.288987		40.5715	0.528609	0.477156	1.21617	0.270113	0.542675		38.4929	0.124672	0.609365	0.0360677	0.849376	0.975166					50.9888	0.513772	0.412722	1.37978	0.240138	NA		62.3203	0.128176	0.458533	0.0778508	0.780231	1
ENSMUSG00000001751	Naglu	32.721	-2.56299	1.19894	5.60723	0.0178865	0.184194		30.5374	-0.827717	0.456046	3.28768	0.0698017	0.254681		56.1064	-0.49002	0.573925	0.801185	0.370739	0.819396					17.8315	0.271586	0.553995	0.218599	0.640109	NA		55.8684	-0.301217	0.398558	0.559852	0.45432	1
ENSMUSG00000001755	Coasy	122.288	-0.115413	0.654509	0.0343685	0.852925	0.962897		161.834	-0.876302	0.306122	7.87503	0.00501219	0.0476754		226.125	1.11709	0.489852	5.33965	0.0208456	0.265914	B				102.097	0.290607	0.226895	1.60915	0.204611	NA		240.06	-0.842008	0.359953	5.11743	0.0236867	1
ENSMUSG00000001763	Tspan33	3122.59	1.23135	0.476691	5.43248	0.0197655	0.193058		5968.46	1.02684	0.338217	9.48344	0.00207335	0.025829		3752.28	0.725261	0.437221	2.2077	0.137323	0.607603	B				5252.43	-0.563212	0.258017	4.8784	0.0271948	0.333839		4384.67	-0.0802372	0.349175	0.0524929	0.818781	1
ENSMUSG00000001767	Crnkl1	193.97	0.497046	0.496031	1.01364	0.314033	0.686991		240.29	1.13845	0.266061	18.311	1.87616e-05	0.000677158		183.215	-0.193044	0.317774	0.377375	0.539011	0.905171	B				282.024	0.110726	0.308163	0.123579	0.725185	0.935044		183.316	0.0417853	0.232676	0.032335	0.857294	1
ENSMUSG00000001768	Rin2	54.3842	-0.471275	1.04285	0.255846	0.612989	0.86936		69.2424	0.799752	0.43134	3.46961	0.0625059	0.23921		53.8543	-0.373112	0.665739	0.382388	0.536328	0.903401					86.5656	0.319691	0.274806	1.32514	0.249672	NA		60.4876	-0.105787	0.4429	0.0570496	0.811221	1
ENSMUSG00000001774	Chordc1	264.485	0.402792	0.613926	0.360295	0.548342	0.842294		315.856	0.0305585	0.249675	0.0149689	0.902624	0.96021		285.508	0.144893	0.402106	0.125271	0.723386	0.953048					352.471	0.318315	0.237071	1.74523	0.186478	0.63696		342.976	-0.254852	0.260298	0.939572	0.332388	1
ENSMUSG00000001783	Rtcb	617.082	0.244723	0.45597	0.305043	0.580738	0.856366		622.308	-0.445979	0.253406	3.02163	0.0821606	0.279583		774.34	0.396277	0.374335	1.18839	0.275654	0.753646					477.903	0.0553616	0.191073	0.0841042	0.771811	0.94812		1008.43	-0.0436967	0.286961	0.0231281	0.879124	1
ENSMUSG00000001785	Pwp1	104.325	-0.455255	0.718669	0.430271	0.511856	0.822484		79.146	-0.686093	0.671971	1.01622	0.313418	0.584939		129.981	-0.147477	0.380636	0.162645	0.686733	0.942408					60.6244	0.562408	0.443445	1.49819	0.22095	NA		130.148	-0.321572	0.276226	1.32775	0.249206	1
ENSMUSG00000001786	Fbxo7	2878.33	0.640231	0.423124	2.10531	0.146788	0.510997		5422.46	0.620274	0.321458	3.81012	0.0509439	0.211726		3837.6	0.698029	0.360163	3.36775	0.0664845	0.452101					5270.66	-0.153647	0.26891	0.329001	0.566248	0.884773		4443.55	-0.0400108	0.311919	0.0164079	0.898075	1
ENSMUSG00000001794	Capns1	1519.88	0.0330985	0.360947	0.00829993	0.92741	0.982487		1736.33	-0.205103	0.233328	0.776599	0.378183	0.644323		2004.92	0.0689724	0.339106	0.0384754	0.844492	0.974417					1420.35	-0.0945584	0.183469	0.265676	0.606247	0.900629		2121.3	-0.225339	0.243528	0.839938	0.359414	1
ENSMUSG00000001827	Folr1	5.43541	5.488	2.97877	2.02933	0.154289	NA		20.2425	-2.49042	0.973028	5.08337	0.0241564	0.133287		23.1041	7.26783	1.3175	42.6252	6.62993e-11	2.24687e-07	F				7.02567	-1.72367	0.948358	3.06861	0.0798179	NA		21.0202	-1.58137	0.616437	5.87425	0.015364	1
ENSMUSG00000001829	Clpb	14.9447	5.08422	1.87027	4.35404	0.0369214	0.266693		20.0417	0.00485977	0.667626	5.05759e-05	0.994326	0.999951		17.8267	3.12859	0.984268	8.60432	0.00335367	0.106134					18.8928	0.0337315	0.451586	0.00525979	0.942185	NA		29.1964	0.702394	0.62856	1.28696	0.256609	1
ENSMUSG00000001833	Septin7	947.324	-0.536004	0.407597	1.70543	0.19158	0.569477		1013.81	-0.285617	0.242596	1.39767	0.237114	0.508514		1287.25	-0.256189	0.357425	0.478741	0.488993	0.883159					936.798	0.286101	0.154284	3.3264	0.0681758	0.447799		1480.72	0.477333	0.307691	2.46962	0.116066	1
ENSMUSG00000001844	Zdhhc4	167.945	-0.582341	0.650839	0.916126	0.338494	0.708782		230.145	-0.551944	0.282851	3.81028	0.0509389	0.211726		274.767	0.216764	0.360388	0.357292	0.550014	0.908091					173.021	-0.0505242	0.222898	0.0500676	0.822946	0.952284		322.863	-0.101592	0.272238	0.13825	0.710027	1
ENSMUSG00000001847	Rac1	845.403	0.323323	0.392384	0.636937	0.424822	0.773504		1195.8	0.0374412	0.278632	0.0184652	0.891911	0.954813		1057.61	0.0372019	0.404938	0.00728248	0.931993	0.992637					1152.42	-0.0420817	0.166378	0.0648856	0.798934	0.949673		1313.43	0.0158765	0.307339	0.00266796	0.958806	1
ENSMUSG00000001855	Nup214	94.5522	0.300818	0.682189	0.201639	0.653401	0.886501		84.4475	0.73049	0.332058	4.90953	0.0267088	0.142036		84.873	-0.732439	0.524355	1.86616	0.171915	0.655233					73.8979	-0.437737	0.221739	3.78862	0.0516023	NA		84.5366	-0.471192	0.436343	1.12204	0.28948	1
ENSMUSG00000001864	Aif1l	68.5249	-2.85161	1.16036	8.09704	0.00443376	0.0831733		115.187	-2.65153	1.06634	4.5252	0.0333991	0.164382		176.165	2.69358	1.47449	2.53095	0.111633	0.562338					43.855	-0.243435	0.934244	0.00320741	0.954837	NA		188.987	0.25681	0.919252	0.0794472	0.778048	1
ENSMUSG00000001865	Cpa3	21.0821	0.31682	1.58648	0.0405669	0.840376	0.958965		24.7452	-0.727697	0.682449	1.17852	0.277657	0.551219		32.5117	0.0492297	0.865939	0.00218314	0.962733	0.996196					28.9034	0.642183	0.620948	0.856059	0.354844	NA		31.6422	0.10067	0.774433	0.0165607	0.897604	1
ENSMUSG00000001870	Ltbp1	1085.5	-1.50753	0.454478	12.6757	0.000370429	0.017558		1133.83	-0.246966	0.270438	0.84258	0.35866	0.624777		1610.99	-0.585133	0.413215	1.89744	0.168365	0.649588	A				915.323	-0.0595022	0.194354	0.09428	0.758805	0.944645		1479.21	0.025054	0.29928	0.00701677	0.933242	1
ENSMUSG00000001891	Ugp2	223.547	-1.02333	0.657759	2.88741	0.0892744	0.407973		165.71	0.339732	0.266685	1.59987	0.205921	0.468651		223.696	-1.04358	0.449172	6.59027	0.0102537	0.185749					158.643	0.0340289	0.223635	0.0231479	0.879073	0.969572		200.89	-0.0764679	0.301637	0.0641444	0.800062	1
ENSMUSG00000001909	Trmt1	144.035	-1.6103	0.691342	6.53057	0.0106036	0.134374		138.01	-0.731259	0.26386	7.53875	0.00603858	0.0538462		213.395	-0.388351	0.437594	0.882664	0.347473	0.805641			TRMT1		96.2612	0.0109641	0.229375	0.00224964	0.96217	NA		213.222	-0.342854	0.303555	1.24692	0.264141	1
ENSMUSG00000001910	Nacc1	119.71	-1.96147	0.80546	7.71056	0.00548987	0.0937147		125.832	-0.875864	0.433112	3.96438	0.0464726	0.200615		205.94	0.327208	0.6248	0.32295	0.56984	0.914849					87.0019	0.601337	0.334913	3.11558	0.077547	NA		216.149	-0.303974	0.450593	0.445536	0.504462	1
ENSMUSG00000001911	Nfix	384.891	0.865604	0.516564	2.65146	0.103455	0.438984		581.439	0.794901	0.268166	8.90394	0.00284555	0.0320648		428.957	0.331651	0.367374	0.726042	0.394169	0.836171	B				487.021	-0.591691	0.187306	10.1102	0.00147452	0.106818		453.747	-0.0939454	0.289581	0.104361	0.746658	1
ENSMUSG00000001918	Slc1a5	191.962	0.0133218	0.510497	0.000634782	0.9799	0.996306		257.114	0.0851362	0.208069	0.167985	0.681909	0.851928		241.749	0.134831	0.318554	0.172876	0.677569	0.939306					229.903	-0.160381	0.267423	0.363314	0.546671	0.873859		312.011	0.00953366	0.260525	0.00133706	0.970831	1
ENSMUSG00000001924	Uba1	1584.15	-0.189827	0.447848	0.194227	0.659422	0.888952		2000.83	0.0398982	0.279698	0.020683	0.885646	0.95234		2113.67	-0.0836456	0.372218	0.0473297	0.827777	0.973226					2461.02	0.425228	0.316344	1.69514	0.192924	0.641236		2333.91	-0.195269	0.355937	0.296529	0.586066	1
ENSMUSG00000001930	Vwf	2128.09	1.08651	0.543116	3.20093	0.0735965	0.377047		2548.88	-0.231656	0.32429	0.517043	0.472106	0.718606		3261.07	0.869268	0.59666	1.35769	0.243938	0.729226					2233.75	-0.0478646	0.275096	0.0295519	0.863511	0.965329		3687.79	0.0381065	0.370758	0.0105785	0.918081	1
ENSMUSG00000001942	Siae	197.436	-0.73393	0.511363	2.03507	0.153707	0.522716		179.322	-0.837292	0.256425	10.5041	0.00119108	0.0174861		274.681	-0.343243	0.401593	0.662234	0.415772	0.844613	B				133.266	-0.0324173	0.173921	0.0347761	0.852066	0.961524		296.505	0.374658	0.298823	1.60396	0.205343	1
ENSMUSG00000001943	Vsig2	6.21014	-1.8804	2.09458	0.727123	0.393817	NA		19.1557	0.151564	0.667522	0.0523587	0.819009	0.921947		12.6574	0.539892	1.03621	0.257033	0.612166	0.923755					15.4207	-0.583684	0.519346	1.299	0.254395	NA		17.9646	0.186385	0.751927	0.0614034	0.804291	1
ENSMUSG00000001946	Esam	1403.82	-1.29541	0.476109	8.18607	0.00422133	0.0810402		1827.04	-0.333292	0.304891	1.19625	0.274073	0.547272		2175.33	-0.358033	0.402844	0.761558	0.382841	0.82882					1442.59	-0.184132	0.187318	0.974032	0.323677	0.755232		2233.22	-0.0220391	0.314951	0.00487822	0.944318	1
ENSMUSG00000001948	Spa17	85.4125	-2.43038	0.874826	8.69015	0.00319934	0.0683999		80.1712	-1.75883	0.47406	13.1596	0.000286054	0.00599211		156.137	-0.533857	0.565778	0.762257	0.382623	0.82882	B				58.0951	0.783796	0.28847	7.05843	0.00788931	NA		201.189	0.779662	0.423583	3.53189	0.060199	1
ENSMUSG00000001962	Fam50a	204.695	0.0398372	0.488015	0.00690304	0.933784	0.984673		355.69	1.28739	0.289286	19.7852	8.66531e-06	0.000352884		220.662	-0.334898	0.317573	1.11344	0.291335	0.764718	B				344.439	-0.46717	0.228366	4.2894	0.0383507	0.369704		238.669	0.0598875	0.30225	0.0393724	0.842713	1
ENSMUSG00000001964	Emd	400.913	1.32189	0.417064	8.82032	0.00297895	0.0655845		419.569	-0.0939917	0.255814	0.134153	0.714165	0.868566		441.527	0.752361	0.304222	5.86567	0.015439	0.231305					387.783	0.20803	0.17071	1.47728	0.224201	0.669762		627.834	-0.174133	0.245999	0.494629	0.481869	1
ENSMUSG00000001983	Taco1	5.24702	0.146602	2.51004	0.00376144	0.951096	NA		7.54885	0.172075	0.763194	0.0504046	0.822361	0.922955		7.83763	0.563763	1.13433	0.262064	0.608706	0.923423					6.90333	0.0955329	0.606543	0.0249276	0.874548	NA		8.60909	-0.490977	0.973937	0.249288	0.617577	1
ENSMUSG00000001986	Gria3	4.93414	3.46523	2.80871	1.22463	0.268455	NA		2.41924	-0.38875	1.46812	0.0577159	0.810143	NA		3.21248	1.02405	1.96047	0.301899	0.582695	NA					3.70576	1.32083	0.758895	2.91817	0.0875872	NA		5.50584	0.915701	1.24939	0.55727	0.455362	1
ENSMUSG00000001995	Sipa1l2	34.6279	-1.72158	0.97646	3.77728	0.0519531	0.314134		31.1819	0.365064	0.470528	0.618953	0.431437	0.687103		41.5113	-1.20337	0.592328	4.54486	0.0330177	0.331196					40.0094	0.670447	0.302966	4.70003	0.0301622	NA		39.5131	-0.0822881	0.474236	0.0300485	0.86238	1
ENSMUSG00000001998	Ap4e1	19.6574	-0.503761	1.34581	0.124237	0.724484	0.912605		17.6232	0.351264	0.610737	0.339683	0.560012	0.777527		19.2823	-0.604104	0.718572	0.75614	0.384539	0.830259					18.1177	0.0838335	0.51752	0.0254767	0.873185	NA		21.9998	-0.351755	0.563499	0.382539	0.536248	1
ENSMUSG00000001999	Blvra	68.2446	-0.558107	0.7972	0.528892	0.467073	0.796408		61.2779	0.213353	0.362111	0.339165	0.560311	0.777739		70.7696	-0.430025	0.449816	1.04356	0.306995	0.775577					58.8562	0.079058	0.343153	0.0479772	0.826621	NA		79.1504	0.172236	0.375389	0.212337	0.644942	1
ENSMUSG00000002006	Pdzd4	6.28643	-0.397665	2.83967	0.0425931	0.836493	NA		4.40876	-0.849543	1.12949	0.612713	0.433768	0.688948		4.21984	-0.243358	1.51697	0.019633	0.888567	0.983595					3.48748	0.200985	0.953695	0.108799	0.741516	NA		6.15457	1.05822	0.888957	1.49426	0.221557	1
ENSMUSG00000002007	Srpk3	28.9638	-0.290547	1.30435	0.0599323	0.806603	0.946653		56.2111	-0.121268	0.449048	0.0709121	0.790013	0.909474		61.8779	0.982611	0.527764	3.60582	0.0575778	0.428703					34.2693	-0.615399	0.455829	1.84075	0.174863	NA		86.541	-0.193778	0.401897	0.229574	0.63184	1
ENSMUSG00000002010	Idh3g	384.512	0.836467	0.445614	3.12667	0.0770208	0.383973		562.029	0.820694	0.213852	14.9774	0.000108805	0.00276349		415.012	0.073374	0.340004	0.0417268	0.838141	0.974417	B				676.175	0.0737061	0.276812	0.0698669	0.791531	0.94812		515.579	-0.249439	0.252436	0.956344	0.32811	1
ENSMUSG00000002012	Pnck	22.9858	-3.00233	1.17307	7.42466	0.0064336	0.101984		22.3347	-2.20507	0.597975	13.2037	0.000279391	0.00591693		51.2041	-0.0205965	0.638288	0.000863673	0.976555	0.997734	B				15.6665	1.6036	0.644293	4.54338	0.0330463	NA		54.4145	-0.408974	0.51869	0.596066	0.440083	1
ENSMUSG00000002014	Ssr4	654.824	-0.784576	0.419908	3.45997	0.0628714	0.348487		644.006	-0.17949	0.265746	0.460613	0.497338	0.734587		837.473	-0.553834	0.38215	2.00246	0.157044	0.630999					619.976	0.266828	0.178424	2.19543	0.13842	0.571377		1004.82	0.467741	0.329202	2.06982	0.150239	1
ENSMUSG00000002015	Bcap31	1220.87	0.272255	0.522069	0.233998	0.628575	0.875495		1589.97	-0.981114	0.233894	17.1713	3.41556e-05	0.00109547		2212.33	0.650129	0.451213	1.53895	0.214775	0.703656	B				1098.77	0.0325486	0.143505	0.0516005	0.820301	0.952284		2937.08	0.437562	0.314781	1.98514	0.15885	1
ENSMUSG00000002017	Fam98a	17.7945	1.20769	2.20712	0.125916	0.722704	0.91237		23.0241	-0.0271221	0.704998	0.00149608	0.969146	0.990121		23.9824	0.954817	1.14099	0.520092	0.470802	0.87256					19.8098	-0.0423747	0.515834	0.00642379	0.936119	NA		29.3977	-0.151083	0.584786	0.0660412	0.79719	1
ENSMUSG00000002020	Ltbp2	20.9199	-0.607146	1.18092	0.229494	0.631899	0.877585		34.0847	0.166763	0.456668	0.132238	0.716123	0.869705		34.3617	0.25025	0.638893	0.133851	0.714472	0.951116					27.067	-0.198779	0.310037	0.411152	0.521385	NA		41.756	-0.223495	0.550715	0.162156	0.687179	1
ENSMUSG00000002028	Kmt2a	377.976	0.389091	0.495153	0.598142	0.439288	0.778822		376.605	0.74118	0.250358	8.79318	0.00302359	0.033546		425.239	-0.161436	0.350525	0.206612	0.649436	0.933433	B				323.376	-0.282703	0.244358	1.34521	0.246117	0.692655		475.263	0.109153	0.329036	0.110956	0.739059	1
ENSMUSG00000002031	Ift46	63.745	0.0743641	0.727345	0.0111787	0.915797	0.978548		82.5685	0.218163	0.381746	0.323684	0.569402	0.782812		75.7885	-0.127983	0.391443	0.113122	0.736618	0.956137					87.5715	0.215982	0.325763	0.404332	0.524861	NA		74.1036	-0.398464	0.315507	1.56559	0.210848	1
ENSMUSG00000002033	Cd3g	164.619	-0.947311	0.533711	3.54736	0.0596402	0.338913		108.182	-0.882765	0.565886	2.3709	0.123616	0.354351		193.631	-0.55766	0.470813	1.58568	0.207944	0.699449					95.1356	0.540348	0.407375	1.64774	0.199266	NA		216.8	0.61276	0.3786	2.72855	0.0985685	1
ENSMUSG00000002043	Trappc6a	175.803	-1.02469	0.720253	2.19049	0.138865	0.500136		202.601	-0.25479	0.32297	0.626371	0.42869	0.684672		262.844	-0.217721	0.419751	0.26208	0.608695	0.923423					139.325	-0.248379	0.252003	0.981544	0.321818	0.753772		294.277	0.404772	0.302206	1.83436	0.175613	1
ENSMUSG00000002052	Supt6	317.655	-1.10462	0.67247	3.29849	0.0693437	0.36726		260.076	-0.283754	0.312932	0.811255	0.36775	0.633867		364.866	-0.484156	0.528237	0.977997	0.322694	0.786245					196.922	-0.0145903	0.210386	0.00468988	0.945401	0.987781		339.11	-0.220141	0.390647	0.312365	0.576232	1
ENSMUSG00000002055	Spag5	11.7996	-0.278808	1.43488	0.0348259	0.851961	0.962897		16.6185	0.45908	0.653271	0.493162	0.48252	0.724285		12.7018	-0.0506885	0.976929	0.00261655	0.959204	0.996196					19.2642	0.328043	0.534215	0.374587	0.540515	NA		18.2234	0.958783	0.705988	1.90411	0.167619	1
ENSMUSG00000002058	Unc119	235.695	0.52137	0.6178	0.593969	0.440888	0.779491		233.604	0.141061	0.257708	0.303938	0.581424	0.791647		258.57	-0.166732	0.389473	0.161738	0.687561	0.942652					240.397	0.225198	0.245942	0.831466	0.361849	0.778525		307.619	0.246695	0.232883	1.13694	0.2863	1
ENSMUSG00000002059	Rab34	3.25583	5.72671	4.88532	0.79337	0.373083	NA		2.56548	-1.1478	2.15882	0.222386	0.637228	NA		3.62502	5.29514	2.85318	3.16431	0.0752641	NA					0.92422	-0.0742857	2.38105	0.00419094	0.948383	NA		4.99926	0.283006	1.82897	0.0246847	0.875155	1
ENSMUSG00000002064	Sdf2	456.217	-0.189115	0.39142	0.240155	0.624094	0.874132		612.557	-0.631247	0.262409	5.72234	0.0167504	0.106614		755.62	0.408664	0.396063	1	0.31731	0.783842					481.89	0.073243	0.219396	0.109802	0.740369	0.941366		885.722	0.254089	0.335335	0.583243	0.445044	1
ENSMUSG00000002068	Ccne1	20.3375	-0.629178	1.54733	0.104216	0.746827	0.922707		17.524	0.413799	0.590055	0.506841	0.47651	0.720979		21.7501	-1.18029	0.84927	1.40213	0.236368	0.722984					14.9419	-0.304226	0.487874	0.37399	0.540838	NA		21.8584	-0.659359	0.682841	0.888508	0.345882	1
ENSMUSG00000002076	Hsf2bp	16.0524	1.55807	1.48778	0.714694	0.39789	0.755793		45.1598	-0.37292	0.509643	0.532597	0.465517	0.713638		40.1553	1.97562	0.844919	3.29825	0.0693537	0.458548					27.2752	-0.943131	0.352837	7.37492	0.00661396	NA		43.4215	-0.291467	0.537659	0.285642	0.593027	1
ENSMUSG00000002083	Bbc3	63.8705	0.0602156	0.847933	0.00505731	0.943306	0.986969		76.331	0.625889	0.371612	2.88985	0.0891394	0.292851		65.2052	-0.302047	0.511052	0.352888	0.552483	0.908846					79.0121	0.0437923	0.249465	0.0313016	0.859569	NA		86.5699	-0.072757	0.36685	0.0390165	0.843416	1
ENSMUSG00000002102	Psmc3	495.12	0.0708241	0.409617	0.028814	0.865209	0.967232		627.243	-0.143282	0.247464	0.339624	0.560046	0.777527		680.696	0.160363	0.331742	0.209956	0.646802	0.933042		ENSMUSG00000002102			600.182	0.197514	0.206205	0.894062	0.344379	0.767203		852.498	0.285845	0.287255	1.00342	0.316484	1
ENSMUSG00000002103	Acp2	100.596	0.669926	0.990607	0.332826	0.564	0.848158		71.6998	1.49952	0.431275	11.9979	0.0005326	0.00948081		69.3781	-1.22587	0.642353	3.46253	0.0627741	0.443132	B				75.9709	-0.143706	0.331487	0.18909	0.663675	NA		59.4199	0.393098	0.453744	0.766668	0.38125	1
ENSMUSG00000002105	Slc39a13	36.6894	-0.556304	1.0776	0.257988	0.611505	0.868537		40.1875	-0.235378	0.420712	0.303661	0.581597	0.791792		42.711	-0.548325	0.526508	1.07658	0.299465	0.771356					39.699	0.485946	0.325389	1.9971	0.1576	NA		44.3963	0.171902	0.500886	0.119638	0.729428	1
ENSMUSG00000002107	Celf2	2499.53	-0.771306	0.360437	4.8655	0.0273988	0.230124		2535.69	0.0215429	0.22535	0.00919585	0.923604	0.970895		3268.2	-0.534563	0.321947	2.6449	0.103883	0.542126					2038.98	-0.223376	0.138133	2.64432	0.103921	0.51636		3102.67	-0.29216	0.242486	1.4164	0.233997	1
ENSMUSG00000002108	Nr1h3	33.3794	4.30911	1.71475	2.86624	0.0904558	0.410915		22.5367	2.76383	0.912115	8.74205	0.00310955	0.0341056		6.8896	0.378243	1.87208	0.0297363	0.86309	0.979367	B				36.081	0.671967	0.522104	1.46265	0.226509	NA		9.07523	0.620362	1.20826	0.273872	0.600746	1
ENSMUSG00000002111	Spi1	1113.87	-0.290014	0.544012	0.324826	0.568722	0.851586		908.978	0.516704	0.250808	4.29729	0.0381732	0.179007		1004.15	-0.76608	0.388571	4.37724	0.0364219	0.345639					964.83	0.25301	0.237118	1.11268	0.291499	0.731371		972.082	-0.135344	0.350084	0.148051	0.700405	1
ENSMUSG00000002129	Sf3a1	142.259	0.551593	0.67733	0.706357	0.400656	0.75757		137.906	0.332416	0.258767	1.6553	0.198239	0.460383		146.727	0.0103491	0.398591	0.000694232	0.97898	0.997964					110.338	-0.297729	0.183017	2.65523	0.10321	NA		184.945	0.2175	0.315866	0.482325	0.487371	1
ENSMUSG00000002147	Stat6	103.471	1.95609	1.06404	2.02131	0.155106	0.525051		103.275	0.41626	0.317371	1.7387	0.187304	0.446509		107.029	0.474727	0.686508	0.345641	0.556591	0.909547					103.433	0.105131	0.257181	0.164499	0.685047	NA		121.936	-0.497913	0.351806	1.93519	0.164192	1
ENSMUSG00000002190	Clgn	5.70735	4.15977	2.89255	1.34908	0.245438	NA		5.69684	-4.10455	1.06604	15.139	9.98765e-05	0.00259237		13.5545	2.98526	1.2303	2.61374	0.105942	0.547847	B				1.41964	0.373697	1.5002	0.0403155	0.840865	NA		23.1899	0.93474	0.637822	2.18208	0.139626	1
ENSMUSG00000002204	Napsa	997.249	-0.716494	0.509142	2.29472	0.129814	0.485197		827.676	0.226099	0.267456	0.710782	0.399184	0.661754		1069.41	-0.533603	0.439305	1.73713	0.187503	0.672876					712.848	0.0860137	0.218056	0.15534	0.693484	0.925253		1177.41	0.144777	0.321627	0.204987	0.650725	1
ENSMUSG00000002205	Vrk3	362.583	-0.983065	0.649868	2.701	0.100285	0.432706		447.43	0.43558	0.258001	2.90036	0.0885595	0.292175		439.722	-0.553091	0.429435	1.82294	0.176964	0.660678					432.085	-0.0521261	0.18873	0.0756647	0.783261	0.94812		447.676	-0.143428	0.287044	0.246925	0.619248	1
ENSMUSG00000002210	Smg9	40.036	0.291485	1.06608	0.0836258	0.772443	0.932093		39.3373	0.269031	0.430941	0.392487	0.530995	0.758466		50.3975	0.232234	0.538894	0.203364	0.652019	0.933499					33.7084	0.311506	0.335453	0.845366	0.357867	NA		56.3461	-0.606084	0.480633	1.53625	0.215177	1
ENSMUSG00000002221	Paxip1	36.0613	-0.807052	1.11018	0.643155	0.422571	0.771401		24.5115	0.238696	0.50824	0.220633	0.638558	0.827117		36.8487	-0.780861	0.738224	1.31495	0.2515	0.732836					24.6391	0.531381	0.359862	2.12524	0.14489	NA		40.0518	0.276121	0.517831	0.291744	0.589105	1
ENSMUSG00000002222	Rmnd5a	5075.25	0.651264	0.51857	1.34026	0.246989	0.625341		7001.43	0.173864	0.28419	0.382551	0.536241	0.762632		6147.94	0.222898	0.386341	0.280629	0.596289	0.920733					6170.97	-0.300119	0.226142	1.80637	0.178944	0.625309		7300.94	-0.0098944	0.289001	0.00117155	0.972695	1
ENSMUSG00000002227	Mov10	19.5028	-1.37505	2.08467	0.576583	0.447655	0.783732		21.3062	0.382057	0.665027	0.326674	0.567624	0.781637		26.8145	-0.571292	0.79281	0.612379	0.433893	0.853488					23.3442	0.578808	0.564702	1.01257	0.314288	NA		26.5371	-0.301963	0.588585	0.258056	0.611459	1
ENSMUSG00000002228	Ppm1j	15.3232	-3.2735	1.815	3.82235	0.0505732	0.311723		7.5506	-0.24709	0.722491	0.119925	0.729116	0.876639		17.0478	-1.79327	0.777547	6.37567	0.0115695	0.199186					3.69603	-1.03668	0.827389	1.66026	0.197568	NA		11.5028	0.295398	0.630718	0.223246	0.636577	1
ENSMUSG00000002233	Rhoc	160.308	0.755973	0.59986	1.57647	0.20927	0.588314		201.382	-0.302881	0.436634	0.462634	0.496396	0.733866		235.166	0.876318	0.440577	3.7976	0.0513261	0.402117					142.016	-0.13148	0.329821	0.15536	0.693465	0.925253		224.322	-0.474026	0.381062	1.48837	0.22247	1
ENSMUSG00000002249	Tead3	13.2152	1.25319	1.55285	0.642631	0.42276	0.771631		13.6261	-0.0685144	0.644636	0.0113719	0.915075	0.966854		7.81417	-0.466526	0.969413	0.246668	0.619431	0.925719					15.0193	0.204434	0.707771	0.0765817	0.781984	NA		11.7649	0.691349	0.758283	0.847909	0.357145	1
ENSMUSG00000002250	Ppard	49.2969	-1.48139	1.12013	2.17164	0.140576	0.501928		50.8074	0.385487	0.451362	0.718309	0.396699	0.659532		57.1178	-0.520175	0.719409	0.641501	0.423168	0.848782					49.411	0.101172	0.291751	0.121794	0.727097	NA		61.9187	0.33133	0.572523	0.341903	0.558733	1
ENSMUSG00000002257	Def6	210.455	-0.712685	0.641818	1.46441	0.22623	0.607503		161.611	-0.372398	0.313423	1.39183	0.238096	0.50956		223.033	-0.482422	0.426051	1.50899	0.219293	0.709466					145.893	0.347037	0.273921	1.568	0.210498	0.654801		255.755	0.141868	0.258415	0.304749	0.58092	1
ENSMUSG00000002274	Metrn	17.2194	-0.727919	1.36714	0.350803	0.553659	0.844648		17.6905	0.192569	0.628918	0.0958563	0.75686	0.889741		18.2168	-0.353089	0.669629	0.307534	0.579198	0.916676					14.5883	-0.211486	0.498852	0.181629	0.669977	NA		18.8905	-0.513834	0.530866	0.920902	0.337238	1
ENSMUSG00000002279	Lmf1	24.2718	-3.44119	1.15223	11.2985	0.000775687	0.0289204		18.1084	-1.11711	0.552366	4.05729	0.0439811	0.194584		31.5329	-0.757433	0.677801	1.51437	0.218473	0.707787	A				11.6499	-0.189234	0.491465	0.141081	0.707208	NA		26.839	0.0242434	0.45281	0.00289159	0.957116	1
ENSMUSG00000002280	Ciao3	5.95661	-0.151031	2.00516	0.00492486	0.944053	NA		13.5349	0.543791	0.625411	0.764742	0.381849	0.647045		10.5273	0.93842	1.15034	0.637506	0.424616	0.848985					12.6879	-0.137839	0.498875	0.0770894	0.781281	NA		16.5392	-0.0836379	0.793231	0.0111794	0.915794	1
ENSMUSG00000002289	Angptl4	7.5257	8.10129	3.76108	2.81639	0.0933062	0.418916		15.8196	-3.34984	1.077	8.42326	0.00370451	0.03879		25.9334	7.93366	1.64237	18.6816	1.54466e-05	0.00324679	E				4.93211	0.915526	0.959591	0.866465	0.351936	NA		23.8769	-2.71473	1.12888	4.54702	0.0329762	1
ENSMUSG00000002297	Dbf4	87.642	1.27655	0.771855	2.23309	0.135084	0.493301		88.6822	0.316366	0.328847	0.929852	0.334901	0.604451		80.2502	-0.0696681	0.454201	0.0198944	0.887832	0.983565					89.4061	-0.0400922	0.223009	0.0323315	0.857302	NA		85.728	0.208329	0.295567	0.501159	0.478991	1
ENSMUSG00000002307	Daxx	193.639	0.276655	0.535663	0.27567	0.599554	0.86362		191.132	-0.0995747	0.280601	0.123968	0.724771	0.874083		214.341	0.216527	0.417975	0.285862	0.592884	0.920324				DAXX	171.325	0.192024	0.190615	0.989597	0.319841	0.753661		282.341	-0.203676	0.291192	0.482891	0.487116	1
ENSMUSG00000002308	Cd320	17.3826	1.12609	2.24033	0.102398	0.748971	0.922997		22.6469	-1.24833	0.694359	2.84565	0.0916215	0.297238		27.9852	1.72035	1.18438	1.41438	0.234331	0.721785					13.4911	-0.225305	0.505882	0.194598	0.659117	NA		30.1541	-0.668095	0.690154	0.890127	0.345443	1
ENSMUSG00000002319	Ipo4	38.5978	-0.238708	0.882209	0.0791073	0.778511	0.935021		40.0784	-0.173449	0.467261	0.136383	0.711904	0.86726		46.2899	-0.126356	0.504043	0.065756	0.797619	0.969967					29.8133	-0.446504	0.377598	1.3801	0.240084	NA		50.6752	0.0499449	0.393965	0.0161807	0.898779	1
ENSMUSG00000002320	Tm9sf1	10.2469	2.54195	2.21503	0.694864	0.404515	0.760578		7.54788	-0.0549115	0.803256	0.00463238	0.945737	0.979538		11.781	0.422419	1.30022	0.0701285	0.79115	0.969495					7.6513	0.593251	0.669212	0.782322	0.376432	NA		11.7687	-0.457807	0.907286	0.250745	0.616551	1
ENSMUSG00000002324	Rec8	0	NA	NA	NA	NA	NA		2.57025	-4.71788	1.5848	8.37512	0.00380393	NA		4.6668	5.04833	1.85263	6.42215	0.0112706	0.195739					0.240107	0.240446	3.10358	0.0276923	0.867834	NA		7.57059	0.88119	0.98124	0.820613	0.365001	1
ENSMUSG00000002325	Irf9	523.891	0.00553075	0.518828	0.000114655	0.991457	0.998294		554.886	-0.231764	0.179891	1.64323	0.199883	0.462165		661.948	0.0430397	0.294248	0.0213404	0.883856	0.982747					510.064	0.257385	0.20037	1.64371	0.199817	0.646881		863.102	-0.123616	0.235623	0.272421	0.601712	1
ENSMUSG00000002326	Gmpr2	12.4029	0.755781	2.33323	0.043417	0.834942	0.957744		14.2226	0.213598	0.614428	0.117194	0.732098	0.878041		14.1676	-0.309813	1.19083	0.0456766	0.830765	0.973226					12.6244	-0.314348	0.595654	0.27361	0.600921	NA		13.0837	-0.901278	0.718358	1.48877	0.222407	1
ENSMUSG00000002329	Mdp1	218.641	-1.4257	0.743254	4.55934	0.0327398	0.251018		198.561	-0.478919	0.302155	2.46969	0.116061	0.341682		296.044	-0.07952	0.553839	0.0247796	0.874917	0.981306					143.764	0.0833436	0.243448	0.114151	0.735467	0.939538		317.385	-0.236273	0.304635	0.592293	0.441534	1
ENSMUSG00000002332	Dhrs1	299.71	1.26477	0.439502	7.77997	0.00528286	0.0918976		278.437	-0.407423	0.255493	2.51536	0.112742	0.336287		321.832	0.561165	0.319804	2.83195	0.0924061	0.518675					251.369	0.274206	0.225192	1.43724	0.230587	0.67508		380.379	-0.208325	0.248205	0.691937	0.405506	1
ENSMUSG00000002342	Tmem161a	179.929	0.822599	0.565536	1.86663	0.171862	0.546187		245.405	0.930689	0.275818	11.4104	0.00073035	0.0120203		163.083	0.337669	0.328925	1.0352	0.308939	0.77691	B				267.006	-0.0343874	0.261997	0.0172732	0.895437	0.973547		199.749	0.0810766	0.270662	0.0901701	0.763961	1
ENSMUSG00000002343	Armc6	13.3789	-0.023434	1.48514	0.000231575	0.987859	0.997914		29.752	0.819553	0.51584	2.55039	0.110267	0.332346		17.713	0.633338	0.684573	0.867849	0.351552	0.809775					38.7371	0.45754	0.379883	1.40186	0.236412	NA		17.2634	-1.23506	0.574419	4.39545	0.036035	1
ENSMUSG00000002345	Borcs8	817.15	1.31419	0.591317	4.48266	0.0342404	0.257044		1181.1	1.08213	0.260072	17.5658	2.77538e-05	0.000931662		640.981	0.17456	0.367491	0.207174	0.648991	0.933433	B				1135.21	-0.448866	0.192855	5.57965	0.0181703	0.298111		725.483	0.145219	0.254377	0.329109	0.566184	1
ENSMUSG00000002346	Slc25a42	8.55422	5.7093	2.27479	4.72341	0.0297547	0.239528		19.9944	1.9419	0.580511	11.129	0.000849878	0.013494		6.01669	1.81893	1.32757	1.0911	0.296227	0.769273	B				17.5885	-1.24758	0.445667	8.01948	0.00462769	NA		7.10057	-1.56572	0.987998	2.4137	0.120278	1
ENSMUSG00000002365	Snx9	47.1376	0.1043	0.816099	0.0174896	0.894788	0.974747		53.0472	-0.933219	0.378472	5.80501	0.0159806	0.103759		73.9186	0.48199	0.409956	1.36289	0.243038	0.727891					36.509	0.0949172	0.339033	0.0784742	0.779376	NA		84.6405	-0.282175	0.375695	0.555491	0.456083	1
ENSMUSG00000002372	Ranbp3	98.6353	-1.62727	0.867954	4.50156	0.0338639	0.255498		84.6519	-0.501786	0.427854	1.35497	0.244411	0.515376		124.744	-0.568253	0.555862	1.28764	0.256484	0.736895					70.3996	0.126233	0.293362	0.179965	0.671403	NA		123.443	0.0684585	0.380526	0.0326148	0.856685	1
ENSMUSG00000002379	Ndufa11	599.652	0.691458	0.506104	1.59456	0.206676	0.584246		918.707	0.447128	0.308161	2.14978	0.14259	0.38584		684.678	0.203266	0.41174	0.208927	0.64761	0.933191		ENSMUSG00000002379			1021.95	0.0986085	0.269207	0.133981	0.71434	0.931222		959.901	0.513919	0.347373	2.24265	0.13425	1
ENSMUSG00000002395	Use1	686.705	-0.299574	0.526314	0.29532	0.586832	0.857662		655.192	-0.0591093	0.262702	0.0516578	0.820203	0.922122		821.861	-0.369553	0.359897	1.00094	0.317083	0.783688					666.073	0.335434	0.239622	1.90916	0.167057	0.612845		1012.29	0.354263	0.30286	1.39504	0.237556	1
ENSMUSG00000002396	Ocel1	81.1965	1.97852	0.762381	6.44702	0.0111138	0.137562		96.3355	1.76683	0.388516	20.7865	5.13434e-06	0.000233248		39.4688	0.56425	0.612913	0.83789	0.360001	0.813817	B				130.111	0.255585	0.264903	0.903255	0.34191	0.765321		53.5022	-0.123803	0.490307	0.0638439	0.80052	1
ENSMUSG00000002409	Dyrk1b	42.6563	0.528465	0.990616	0.300579	0.58352	0.85704		39.7037	1.64178	0.444912	13.0996	0.000295359	0.00611177		29.6622	-0.81239	0.666548	1.71523	0.190308	0.675863	B				37.4056	-0.532739	0.318278	2.8635	0.0906099	NA		24.9187	-0.362609	0.563927	0.407574	0.523203	1
ENSMUSG00000002413	Braf	106.522	1.37054	0.648463	3.75986	0.0524971	0.315445		140.26	1.72947	0.292894	34.3518	4.59971e-09	5.42955e-07		78.6899	-0.52229	0.418066	1.49539	0.221382	0.712476	B	ENSMUSG00000002413			173.045	-0.130869	0.2674	0.241152	0.623375	0.905296		81.5618	-0.27488	0.37826	0.51766	0.471842	1
ENSMUSG00000002416	Ndufb2	170.825	0.122859	0.701742	0.0252543	0.873735	0.967923		206.285	0.510673	0.367038	1.93017	0.16474	0.415557		171.958	-0.067789	0.562076	0.0150233	0.902448	0.986695		ENSMUSG00000002416			232.378	0.304721	0.324775	0.831956	0.361708	0.778525		198.417	0.479592	0.388656	1.56907	0.210342	1
ENSMUSG00000002428	Hltf	92.4271	1.2874	0.764279	2.3403	0.126065	0.47937		108.948	0.499833	0.312559	2.52341	0.112168	0.33513		100.637	0.304311	0.420285	0.462373	0.496517	0.888054					107.432	-0.105403	0.241518	0.184742	0.667329	NA		105.293	-0.234006	0.302823	0.588061	0.44317	1
ENSMUSG00000002455	Prpf6	226.079	1.22086	0.59774	3.7263	0.0535619	0.318894		221.065	0.0723392	0.298795	0.0587609	0.808465	0.916923		269.729	0.450921	0.392539	1.1261	0.288608	0.763432					196.267	0.140874	0.228397	0.381549	0.536775	0.868942		358.977	0.360748	0.311741	1.36992	0.241826	1
ENSMUSG00000002458	Rgs19	179.501	-1.03226	0.636063	3.11756	0.0774526	0.385442		185.305	-0.196314	0.284895	0.47458	0.490888	0.730297		242.329	-0.34838	0.407438	0.810785	0.367888	0.817833					160.587	0.192459	0.239073	0.62205	0.430287	0.812494		244.636	-0.432202	0.335547	1.60893	0.204643	1
ENSMUSG00000002459	Rgs20	3.03037	1.04771	2.63142	0.0956631	0.757098	NA		3.88969	0.37625	1.04422	0.126793	0.72178	0.872376		2.92377	0.543123	1.66006	0.100221	0.751565	NA					4.67712	0.305895	0.562506	0.30203	0.582613	NA		3.71113	0.684665	1.19945	0.337389	0.56134	1
ENSMUSG00000002475	Abhd3	1.58328	2.31852	5.10404	0.111913	0.737976	NA		3.73531	1.90189	3.22846	0.328055	0.566806	0.781511		1.81248	2.73733	2.95187	1.02643	0.311	NA					2.05936	-2.46606	1.56759	0.930392	0.334761	NA		4.19804	1.93216	1.50961	1.77691	0.182529	1
ENSMUSG00000002477	Snrpd1	192.754	-0.04416	0.496608	0.00774754	0.929861	0.98369		199.586	-0.569531	0.304906	3.40267	0.0650909	0.245193		274.338	0.251342	0.387906	0.406642	0.523679	0.901097					164.743	0.479112	0.227136	4.11129	0.0425978	0.379574		337.422	0.276544	0.312835	0.795196	0.372533	1
ENSMUSG00000002486	Tchp	16.3568	0.14536	1.3413	0.0102034	0.919541	0.980048		20.6992	0.202799	0.570874	0.129639	0.718807	0.87089		17.7588	-0.060044	0.653969	0.00821707	0.927772	0.991872					19.2784	0.00565265	0.482137	0.000140931	0.990528	NA		20.5438	-0.494752	0.615198	0.627285	0.428353	1
ENSMUSG00000002489	Tiam1	75.4331	0.0204607	0.683871	0.000945122	0.975475	0.994132		81.4074	0.0525079	0.273463	0.0370472	0.847369	0.934714		90.9106	0.0708361	0.385086	0.0347259	0.852171	0.975733					71.307	0.0852612	0.250311	0.115572	0.733887	NA		116.363	0.370691	0.360403	1.087	0.297138	1
ENSMUSG00000002496	Tsc2	24.7912	1.32249	1.10121	1.28578	0.256827	0.633872		23.8346	-0.519968	0.610173	0.737406	0.390493	0.654199		23.6884	-0.00347463	0.688793	2.03471e-05	0.996401	0.999966					21.6359	0.0396201	0.367935	0.011383	0.915034	NA		26.2303	-0.0465723	0.594006	0.00619872	0.937246	1
ENSMUSG00000002500	Rpl3l	31.5067	0.591539	1.06238	0.255185	0.613448	0.869631		17.4747	1.27329	0.737445	2.99607	0.0834666	0.28273		17.6872	-1.42593	0.903608	2.69517	0.100653	0.534783					26.7327	0.639222	0.585678	1.15878	0.281719	NA		20.2857	1.10498	0.623692	3.31583	0.0686156	1
ENSMUSG00000002504	Slc9a3r2	10.9053	-1.94666	2.77622	0.1365	0.711785	0.909194		19.6144	0.953318	0.774736	1.56751	0.210569	0.474776		9.1779	-0.594113	1.47522	0.134026	0.714294	0.951116					16.9776	-0.912352	0.705844	1.50968	0.219188	NA		7.99263	-0.532975	0.972432	0.285976	0.592811	1
ENSMUSG00000002524	Puf60	476.568	0.691666	0.491741	2.01195	0.156064	0.526145		474.599	-0.216015	0.202941	1.12648	0.288527	0.561952		535.988	0.325592	0.318401	1.04292	0.307143	0.775577					420.34	0.169616	0.182633	0.843921	0.358278	0.778525		648.788	-0.327189	0.223785	2.08595	0.14866	1
ENSMUSG00000002546	Golga2	174.369	1.22579	0.563992	3.94204	0.0470937	0.302183		212.169	0.315597	0.274372	1.29372	0.255364	0.527163		222.862	0.913707	0.353752	6.21126	0.012694	0.210071					206.383	0.332446	0.21555	2.31487	0.128142	0.558828		315.337	0.0302699	0.322757	0.00883039	0.925133	1
ENSMUSG00000002550	Uck1	23.7919	2.26564	1.22078	2.42343	0.119533	0.470023		33.3214	-0.0659004	0.479503	0.0182169	0.892635	0.955182		33.208	1.53659	0.624833	4.68242	0.0304727	0.318832					24.8087	-0.294858	0.346247	0.704458	0.40129	NA		49.9194	0.241528	0.393943	0.381236	0.536943	1
ENSMUSG00000002565	Scin	5.48901	4.94109	4.06751	0.999851	0.317347	NA		16.0649	-5.30391	1.62973	7.37484	0.00661427	0.0573898		28.1946	6.73591	1.73934	14.1758	0.000166497	0.0184628	F				5.51921	2.33511	1.12503	4.12602	0.0422285	NA		22.7858	-4.62938	2.11925	2.96133	0.0852778	1
ENSMUSG00000002578	Ikzf4	21.056	-1.28372	1.59446	0.861387	0.353351	0.72127		14.0218	1.02719	0.734278	1.91573	0.166328	0.418049		19.8633	-1.61513	1.08782	2.74773	0.0973923	0.52884					11.006	-0.767218	0.598275	1.67737	0.195274	NA		14.6623	-0.699168	0.796495	0.740316	0.38956	1
ENSMUSG00000002580	Mien1	405.991	-0.349018	0.436399	0.627859	0.428142	0.774676		511.359	-0.392731	0.230713	2.82209	0.0929754	0.299622		569.312	0.583026	0.379896	2.47055	0.115997	0.570237					432.368	0.246665	0.199335	1.44979	0.228562	0.673823		648.917	-0.0958081	0.221705	0.185309	0.66685	1
ENSMUSG00000002602	Axl	26.2333	-0.44501	1.49014	0.0887919	0.765719	0.929987		19.6251	-1.67056	0.70678	5.16851	0.0229999	0.129434		31.3649	0.513612	0.951582	0.326016	0.568015	0.913376					10.6985	0.163387	0.564446	0.0827082	0.77366	NA		29.3488	-1.57902	0.690675	4.67391	0.0306242	1
ENSMUSG00000002603	Tgfb1	468.371	-0.825277	0.627028	2.06685	0.150532	0.517333		511.575	0.170549	0.256501	0.449706	0.502475	0.738695		650.799	-0.507221	0.475637	1.03436	0.309136	0.777021					361.912	-0.492344	0.295988	2.75285	0.0970811	0.502079		625.488	0.0438532	0.326456	0.0181067	0.892959	1
ENSMUSG00000002608	Ccdc97	181.885	-0.617065	0.668283	0.989377	0.319895	0.692723		183.786	-0.169837	0.336648	0.257373	0.611931	0.813104		215.322	-0.30463	0.524254	0.3686	0.543768	0.906553					148.201	-0.122642	0.230005	0.286658	0.59237	0.896313		242.802	-0.215505	0.37954	0.318243	0.572665	1
ENSMUSG00000002617	Zfp40	0.995864	4.35802	5.80527	0.53993	0.462462	NA		9.51439	0.993106	0.748738	1.84406	0.174476	0.429143		7.01399	5.86636	1.78269	9.70697	0.00183571	0.0770932					6.89933	-0.194111	0.707169	0.0741501	0.785387	NA		10.3022	-0.873232	0.910957	0.872854	0.350166	1
ENSMUSG00000002625	Akap8l	22.5601	2.41295	1.46132	1.60141	0.205703	0.584134		50.3448	2.07526	0.439207	21.9171	2.84691e-06	0.00014316		23.1083	0.967137	0.765907	1.24609	0.2643	0.744032	B				53.5682	-0.406213	0.497996	0.643843	0.422323	NA		34.676	0.0547412	0.425308	0.0166889	0.897211	1
ENSMUSG00000002635	Pdcd2l	94.9388	-0.683859	0.724752	0.979237	0.322387	0.694769		96.7789	-0.819087	0.368056	4.68894	0.0303573	0.154927		123.66	-0.0177535	0.521425	0.00134797	0.970712	0.996905					75.4	-0.00192383	0.282752	4.39571e-05	0.99471	NA		131.72	-0.316481	0.37821	0.685129	0.407826	1
ENSMUSG00000002658	Gtf2f1	71.0907	-0.75598	0.737638	1.2175	0.269852	0.647698		40.5766	-0.309267	0.508184	0.371552	0.54216	0.76568		59.154	-0.957441	0.684178	2.35606	0.124797	0.589395					43.661	0.681324	0.306134	4.70091	0.0301466	NA		66.5224	0.603759	0.473637	1.68453	0.194323	1
ENSMUSG00000002660	Clpp	64.0451	1.81438	1.07734	1.7624	0.184326	0.560698		87.961	0.441527	0.431417	1.01885	0.312792	0.584361		83.4694	1.34296	0.664633	3.32229	0.0683468	0.456275					75.5818	-0.078601	0.288817	0.0745135	0.784875	NA		115.861	0.144252	0.443841	0.106754	0.74387	1
ENSMUSG00000002661	Alkbh7	39.079	1.06448	1.17864	0.889043	0.345737	0.715454		37.5013	-0.480815	0.426313	1.27673	0.258508	0.530233		43.9823	0.598302	0.639704	0.831613	0.361807	0.814969					25.3099	-0.272284	0.405056	0.461391	0.496975	NA		47.158	-0.348613	0.506531	0.456245	0.499384	1
ENSMUSG00000002668	Dennd1c	120.38	-0.403802	0.583424	0.516512	0.472333	0.798809		92.7525	0.444841	0.301833	2.22688	0.135627	0.374385		120.147	-0.813753	0.403155	4.20148	0.0403886	0.365453					92.5678	0.294351	0.268967	1.16717	0.279983	NA		129.905	0.078289	0.35166	0.0500061	0.823053	1
ENSMUSG00000002679	Med6	30.5184	-0.337582	1.07081	0.0883276	0.766314	0.930159		30.234	-1.02148	0.603301	2.79232	0.0947169	0.302676		41.7998	0.0739176	0.471692	0.0236382	0.877809	0.981864					26.987	0.583751	0.460826	1.44902	0.228686	NA		47.5376	-0.271764	0.371047	0.52582	0.46837	1
ENSMUSG00000002699	Lcp2	446.326	-0.387758	0.577277	0.517264	0.472011	0.798809		510.706	0.372422	0.208753	3.21412	0.0730053	0.261115		509.377	-0.337917	0.328929	1.12034	0.289845	0.764125					516.236	0.129051	0.163348	0.611867	0.434086	0.817203		558.598	-0.217149	0.271143	0.630246	0.427265	1
ENSMUSG00000002718	Cse1l	182.892	0.436854	0.494491	0.745224	0.387993	0.747025		180.005	-0.954485	0.256167	13.4091	0.000250412	0.0054722		252.107	0.45826	0.322376	1.94758	0.162848	0.644754	B				131.899	0.110338	0.241918	0.199374	0.655227	0.915094		291.941	-0.0445286	0.271883	0.026729	0.870133	1
ENSMUSG00000002728	Naa20	36.0774	-0.641263	0.969525	0.386496	0.534147	0.833648		37.9836	-0.14865	0.452959	0.105468	0.745364	0.884304		47.2591	-0.24456	0.52064	0.216461	0.64175	0.931248					33.1679	0.0372678	0.314019	0.0138561	0.906296	NA		46.1852	0.0633957	0.393042	0.0260695	0.871731	1
ENSMUSG00000002731	Prkra	71.214	1.03756	0.693294	2.05384	0.151823	0.519194		76.3187	-0.5868	0.363253	2.55933	0.109645	0.331304		89.857	0.813679	0.374334	4.47267	0.0344411	0.336142					69.8717	0.611835	0.302964	3.68352	0.0549526	NA		99.8674	-0.0714398	0.347059	0.0420427	0.837538	1
ENSMUSG00000002732	Fkbp7	4.32197	-0.61922	3.02836	0.0578939	0.809856	NA		4.83845	-0.261748	1.20218	0.0431392	0.835463	0.928711		5.79648	-0.27537	1.16506	0.0661286	0.797059	0.969774					3.09025	-1.61695	1.15609	1.3271	0.249322	NA		4.86826	-1.25733	1.27727	0.91827	0.33793	1
ENSMUSG00000002733	Plekha3	177.118	-1.42917	0.519638	8.58314	0.0033929	0.0707074		136.951	-0.655106	0.25378	6.56623	0.0103932	0.078158		206.657	-0.782028	0.380815	4.85881	0.0275053	0.301408					111.591	0.161574	0.186699	0.74208	0.388995	NA		185.315	-0.254954	0.327683	0.595648	0.440243	1
ENSMUSG00000002741	Ykt6	347.015	-0.727059	0.504679	2.33165	0.126768	0.480091		303.913	-0.0106895	0.212849	0.0024939	0.960171	0.986883		384.793	-0.390714	0.402782	1.09328	0.295747	0.768592					278.766	0.240973	0.167306	2.02084	0.155154	0.599012		396.426	-0.00181754	0.242568	5.62421e-05	0.994016	1
ENSMUSG00000002748	Baz1b	203.211	0.253919	0.501201	0.249173	0.617658	0.871405		213.597	0.308839	0.37935	0.650018	0.420106	0.678199		218.294	0.0681574	0.470493	0.0232003	0.878937	0.982012					199.221	0.0546258	0.233065	0.0546641	0.815138	0.95115		269.38	-0.0424766	0.364327	0.0135836	0.907218	1
ENSMUSG00000002763	Pex6	26.4334	0.667779	1.04588	0.40527	0.52438	0.828544		35.5031	-0.0718104	0.500409	0.0205833	0.88592	0.95234		36.6942	0.747449	0.530749	1.97443	0.159979	0.636975					28.0448	-0.223394	0.357604	0.383662	0.53565	NA		40.8329	-0.271423	0.452839	0.354848	0.551381	1
ENSMUSG00000002767	Mrpl2	96.4523	-0.64159	0.749111	0.786577	0.375137	0.737308		86.7357	-0.328891	0.312377	1.10375	0.293445	0.566933		119.327	-0.346724	0.434245	0.67282	0.41207	0.843651					64.5855	-0.125422	0.281535	0.200344	0.654443	NA		130.552	-0.119394	0.382336	0.0967777	0.755731	1
ENSMUSG00000002768	Mea1	8.01956	0.893157	1.69693	0.24294	0.622091	0.873024		4.81512	-1.77494	0.833451	4.63495	0.031327	0.158239		8.56595	-0.168163	0.945005	0.02493	0.874542	0.981306					4.80414	1.52528	0.605868	6.28588	0.0121704	NA		10.5154	0.0791214	0.713366	0.0121613	0.912189	1
ENSMUSG00000002769	Gnmt	9.04156	-0.120524	2.87314	0.000528668	0.981656	0.996306		3.52878	-0.230096	1.40966	0.0090059	0.924395	0.971008		6.45839	0.640997	2.17399	0.0594624	0.807348	0.971618					5.19734	1.99256	0.98916	4.21062	0.0401716	NA		3.89602	-1.75541	1.69932	0.960748	0.326999	1
ENSMUSG00000002771	Grin2d	5.94347	2.87287	3.02888	0.442127	0.506098	NA		4.89074	-0.692942	0.920522	0.528383	0.467287	0.714905		8.69214	1.83844	1.40036	1.43962	0.230202	0.717661		ENSMUSG00000002771			2.08863	-1.12169	0.980079	1.25469	0.26266	NA		10.0369	0.127691	0.930435	0.0187753	0.891013	1
ENSMUSG00000002778	Kdelr1	434.257	-0.0437356	0.386133	0.0128479	0.909754	0.977687		521.777	-0.0785047	0.218926	0.128221	0.720284	0.871738		539.886	0.190659	0.303129	0.407667	0.523156	0.901006					413.761	-0.229977	0.181304	1.62776	0.202013	0.648186		675.07	-0.25001	0.219427	1.27535	0.258766	1
ENSMUSG00000002781	Tmem143	24.4643	-0.354503	1.45865	0.0618336	0.803621	0.945586		22.6458	-0.78503	0.557663	1.96927	0.160525	0.410229		33.275	0.11885	0.63314	0.0359924	0.849531	0.975216					16.0246	0.47452	0.619289	0.516904	0.472165	NA		30.8834	-0.737407	0.484342	2.20303	0.13774	1
ENSMUSG00000002797	Ggct	69.9323	1.21015	0.803577	2.00087	0.157209	0.527004		71.1924	-0.714758	0.384653	3.30611	0.0690228	0.253054		97.7286	1.15309	0.459256	6.1411	0.0132075	0.213549					62.5183	0.707538	0.269553	6.73864	0.00943467	NA		132.122	0.221164	0.398131	0.314168	0.575134	1
ENSMUSG00000002799	Jag2	2.3471	2.21467	3.68598	0.168114	0.681793	NA		3.51256	0.528995	1.04858	0.237264	0.626189	0.821093		2.9906	2.6409	2.29875	1.34195	0.24669	NA					3.37429	-0.0975768	0.812251	0.0136879	0.906864	NA		4.34833	-0.284614	1.29838	0.0478694	0.826813	1
ENSMUSG00000002803	Btbd6	18.5876	1.66267	1.32114	1.57461	0.209538	0.588772		26.7283	0.183728	0.604284	0.0904443	0.763613	0.893252		24.3072	1.13192	0.842833	1.76294	0.184258	0.67156					23.6785	-0.0401198	0.325165	0.015391	0.901267	NA		30.3346	-0.117823	0.724932	0.0262329	0.871333	1
ENSMUSG00000002804	Nudt14	84.8877	-0.426618	0.667595	0.440902	0.506687	0.818856		68.4574	-0.623343	0.429131	2.00898	0.156371	0.404872		99.3654	-0.200974	0.482253	0.19228	0.661026	0.935813					50.3351	0.0622207	0.309922	0.0389535	0.843541	NA		115.24	0.132751	0.361395	0.13601	0.71228	1
ENSMUSG00000002808	Epdr1	9.85292	9.04951	2.98573	6.55287	0.0104715	0.13367		26.969	1.41432	0.580001	6.05909	0.0138349	0.0942464		9.0436	4.52694	1.74281	3.93324	0.0473407	0.390111					35.4212	-0.0448551	0.417917	0.0107193	0.917539	NA		11.266	-0.0309442	0.876933	0.00125111	0.971784	1
ENSMUSG00000002812	Flii	39.7417	1.47951	1.03881	1.49283	0.221777	0.603631		46.3168	0.674936	0.401353	2.85968	0.0908255	0.295984		38.8172	0.22993	0.706147	0.0778964	0.780169	0.968383					46.4265	0.0473985	0.288283	0.0268239	0.869904	NA		45.6561	-0.16684	0.519511	0.101455	0.75009	1
ENSMUSG00000002814	Top3a	11.1556	1.59166	1.80285	0.85481	0.355195	0.722614		11.2724	-1.2071	0.872964	1.76841	0.183578	0.44125		11.2217	0.893042	1.02968	0.850149	0.35651	0.811764					7.80161	-0.312844	0.76423	0.165766	0.683902	NA		17.0353	-0.382051	0.801912	0.221035	0.638252	1
ENSMUSG00000002820	Atg4d	13.0748	0.966925	1.87254	0.276171	0.599222	0.863335		15.6727	-0.435823	0.539677	0.642202	0.422915	0.680389		12.6108	0.912233	0.944329	0.943714	0.331324	0.79154					16.7048	0.34672	0.434684	0.52145	0.470224	NA		19.6036	0.75526	0.599163	1.62098	0.202955	1
ENSMUSG00000002825	Qtrt1	25.7221	-0.304798	1.23351	0.0668576	0.795968	0.943024		23.8556	-0.303809	0.59239	0.243988	0.621341	0.818371		30.4209	-0.147725	0.683958	0.0548479	0.814833	0.972883					20.2358	0.144906	0.444496	0.102545	0.748797	NA		33.4713	0.232917	0.490126	0.229016	0.632255	1
ENSMUSG00000002833	Hdgfl2	27.766	-0.270083	1.08346	0.0632395	0.801447	0.94512		22.0422	-0.581144	0.477671	1.46281	0.226483	0.495686		31.3731	-0.260568	0.593805	0.19051	0.662493	0.935813					16.0532	0.102421	0.381161	0.0721558	0.788223	NA		30.9094	-0.540634	0.515828	1.06446	0.3022	1
ENSMUSG00000002835	Chaf1a	2.38931	1.56715	3.91349	0.0754894	0.783506	NA		2.81318	-0.888368	1.37779	0.414368	0.519761	NA		3.60644	0.475135	1.81072	0.0359483	0.849622	NA					3.4511	0.96863	0.911213	1.08762	0.297	NA		5.39414	1.7495	1.29661	1.89188	0.16899	1
ENSMUSG00000002844	Adprh	577.444	-0.219182	0.547248	0.179857	0.671496	0.892676		633.814	0.0156786	0.282001	0.00312333	0.955432	0.984908		687.579	-0.194296	0.437216	0.20568	0.650175	0.933433					561.841	-0.0765532	0.205	0.139163	0.709115	0.928512		809.958	-0.228416	0.323138	0.490859	0.483544	1
ENSMUSG00000002845	Tmem39a	28.3651	-1.88208	1.35819	1.82195	0.177081	0.551974		28.3264	-0.906942	0.488074	3.44102	0.0635966	0.241906		42.0858	-0.313059	0.597736	0.301925	0.582678	0.917322					23.3195	0.25399	0.379502	0.423419	0.515236	NA		38.9815	-0.374491	0.467543	0.631514	0.4268	1
ENSMUSG00000002846	Timmdc1	159.77	0.887873	0.603201	1.93065	0.164687	0.537056		234.69	0.674984	0.400564	2.89906	0.0886315	0.292212		140.861	0.31177	0.477826	0.413135	0.520382	0.900409					284.802	0.207154	0.299086	0.469184	0.493363	0.845184		180.104	0.460456	0.397771	1.37651	0.240696	1
ENSMUSG00000002870	Mcm2	165.36	-0.546956	0.971487	0.383533	0.535718	0.834454		178.657	-0.170399	0.248873	0.470134	0.492925	0.731626		203.347	-0.196534	0.586027	0.123101	0.725695	0.953048					165.39	0.129598	0.184244	0.488841	0.484445	0.84121		227.328	-0.408224	0.316115	1.61942	0.203172	1
ENSMUSG00000002871	Tpra1	119.729	0.0703011	0.791864	0.00900823	0.924385	0.982149		131.696	-0.0855415	0.297212	0.0814432	0.775351	0.901634		139.166	0.0852553	0.522886	0.0286382	0.865617	0.979454					112.229	0.00623269	0.270527	0.000517429	0.981852	NA		159.381	-0.423	0.38526	1.16875	0.279659	1
ENSMUSG00000002881	Nab1	491.54	-0.762612	0.443208	3.20646	0.0733481	0.376811		560.143	0.075121	0.224551	0.112378	0.737453	0.879843		664.768	-0.421178	0.357398	1.33907	0.247198	0.732003					487.74	-0.121591	0.15762	0.606343	0.436168	0.818509		667.837	0.0394327	0.249418	0.0249895	0.874393	1
ENSMUSG00000002885	Adgre5	1668.85	-0.76552	0.563044	2.17249	0.140499	0.5018		1699.19	-0.336808	0.237825	2.0071	0.156564	0.405082		2086.11	-0.391132	0.388032	1.09745	0.294826	0.767938				ADGRE5	1566.43	0.2174	0.22047	0.926619	0.335743	0.762628		2363.5	0.105494	0.24427	0.188094	0.664508	1
ENSMUSG00000002897	Il17ra	3136.85	-2.27783	0.747684	12.126	0.000497245	0.0213362		2171.78	-0.243694	0.323608	0.565051	0.452232	0.703836		3728.77	-0.782682	0.628759	1.97554	0.159861	0.636975	A				1816.47	0.377384	0.235962	2.48472	0.114957	0.533371		3104.2	-0.223607	0.438661	0.255189	0.613445	1
ENSMUSG00000002900	Lamb1	2.54898	6.40215	3.68873	2.34287	0.125857	NA		3.39149	-0.540721	1.33588	0.163084	0.686333	0.854046		2.88049	4.08283	2.424	1.88131	0.170186	NA					4.75617	0.968805	0.859907	1.24609	0.264301	NA		4.43843	0.483973	1.51224	0.102229	0.749171	1
ENSMUSG00000002908	Kcnn1	3.51001	-0.17903	3.10345	0.0156839	0.900337	NA		11.3461	2.59716	0.853165	9.2446	0.0023619	0.0283448		2.24253	0.409746	2.30847	0.0657932	0.797563	NA	B				13.528	-0.377698	0.555202	0.468097	0.493864	NA		6.63927	1.67564	1.28735	1.67981	0.194949	1
ENSMUSG00000002910	Arrdc2	14.1909	0.778372	1.51571	0.297985	0.585148	0.857662		13.8124	-0.266093	0.675398	0.155434	0.693395	0.857647		16.6439	0.537884	0.957543	0.343875	0.557601	0.910208					13.0622	0.495663	0.484107	1.01297	0.314192	NA		19.7624	0.138805	0.671992	0.0434055	0.834964	1
ENSMUSG00000002944	Cd36	2237.99	-0.0753724	0.550233	0.0158926	0.89968	0.97589		3067.75	0.245391	0.329046	0.573172	0.449001	0.701766		2954.74	-0.228698	0.50614	0.165854	0.683823	0.941806					3372.93	0.105307	0.3193	0.107157	0.743405	0.942299		3455.57	0.367087	0.411332	0.814724	0.366727	1
ENSMUSG00000002948	Map2k7	131.893	0.415921	0.576079	0.541838	0.461672	0.793728		108.089	-0.2692	0.367785	0.53333	0.46521	0.713547		141.188	0.0428309	0.471622	0.00831883	0.927328	0.991872		ENSMUSG00000002948			75.7879	-0.228115	0.313544	0.509053	0.475549	NA		138.299	-0.750995	0.394553	3.42407	0.0642525	1
ENSMUSG00000002949	Timm44	30.318	0.456964	0.953096	0.237286	0.626174	0.874877		35.8515	0.0571369	0.406953	0.0194214	0.889165	0.953312		40.6961	0.620246	0.548757	1.33037	0.24874	0.732082					26.03	-0.22014	0.416764	0.283214	0.594602	NA		54.2258	-0.163164	0.487928	0.110988	0.739022	1
ENSMUSG00000002957	Ap2a2	287.211	0.673932	0.428976	2.3029	0.129132	0.484104		528.348	1.90881	0.241133	61.1228	5.36233e-15	1.98007e-12		203.719	-0.536932	0.313754	3.10443	0.0780794	0.484829	B				579.683	-0.42919	0.198222	4.7573	0.0291742	0.345546		225.347	-0.242026	0.268993	0.797459	0.371854	1
ENSMUSG00000002963	Pnkp	112.596	-0.0665968	0.612654	0.0119399	0.912988	0.9778		101.995	0.977388	0.331602	8.93195	0.00280225	0.0317845		99.2627	-0.902948	0.488653	3.54399	0.0597617	0.43359	B				128.805	0.35004	0.29548	1.36757	0.24223	0.687876		114.068	0.194261	0.393959	0.247016	0.619184	1
ENSMUSG00000002968	Med25	85.9152	-0.579608	0.626849	0.866233	0.352	0.719835		83.1421	0.42663	0.319668	1.76171	0.184411	0.442256		80.8807	-0.659786	0.441657	2.41116	0.120473	0.580742					76.424	-0.167307	0.320609	0.271613	0.602252	NA		78.9102	-0.406129	0.386362	1.07425	0.299987	1
ENSMUSG00000002980	Bcam	4.43658	6.51995	3.69868	2.41139	0.120455	NA		3.99536	-1.67789	1.26047	1.58261	0.208385	0.471711		4.23027	5.61605	2.02632	7.43009	0.00641423	0.150364					2.93954	0.211107	0.889355	0.106151	0.744569	NA		4.73787	-0.487672	1.35497	0.126376	0.72222	1
ENSMUSG00000002981	Clptm1	208.194	-0.0185352	0.579931	0.00107633	0.973828	0.993654		245.392	-0.12134	0.253523	0.227107	0.633677	0.824434		274.446	0.450419	0.418704	1.17806	0.277751	0.755006					189.517	0.0271601	0.216117	0.0153979	0.901245	0.97666		317.093	-0.134434	0.306076	0.19123	0.661895	1
ENSMUSG00000002983	Relb	53.0673	0.13193	0.791698	0.028455	0.866043	0.967232		47.2598	-0.082154	0.49962	0.027206	0.868989	0.944691		54.9587	0.00227793	0.506379	2.15976e-05	0.996292	0.999966					43.6941	0.408437	0.349282	1.30141	0.253955	NA		77.1286	-0.0346501	0.371186	0.00871915	0.925605	1
ENSMUSG00000002984	Tomm40	98.3244	-1.50332	0.753576	4.93951	0.0262495	0.223972		78.7962	-0.98505	0.305187	10.3134	0.00132067	0.0188464		123.19	-0.495432	0.504498	1.11993	0.289933	0.764125	B				50.8329	-0.225371	0.319481	0.466929	0.494403	NA		110.696	-0.187426	0.395997	0.221885	0.637607	1
ENSMUSG00000002985	Apoe	701.74	-2.83318	0.492158	34.2476	4.85282e-09	1.64848e-06		884.279	-3.14448	0.479148	35.157	3.04174e-09	3.74394e-07		1868.19	0.43061	0.460563	0.912245	0.339519	0.799306	C	ENSMUSG00000002985			145.595	-0.662575	0.334137	3.77081	0.0521544	0.411504		2486.82	0.220526	0.325612	0.466458	0.494621	1
ENSMUSG00000002996	Hbp1	33.6971	1.13376	0.891797	1.49123	0.222025	0.603903		48.7388	-0.545521	0.374157	2.10554	0.146767	0.39156		51.7676	0.885012	0.590364	1.72472	0.189087	0.675029					51.7182	0.461852	0.395188	1.33346	0.248191	NA		59.4173	-0.407938	0.464722	0.747638	0.387225	1
ENSMUSG00000002997	Prkar2b	4063.56	-1.3699	0.32676	19.3853	1.06828e-05	0.00134681		5322.6	-0.290522	0.317847	0.841978	0.358832	0.624853		6303.38	-0.507666	0.448038	1.14927	0.283701	0.760078	A				4306.85	-0.221131	0.180996	1.49866	0.220878	0.665316		5781.84	-0.04626	0.344142	0.0179308	0.893477	1
ENSMUSG00000003031	Cdkn1b	1748.35	0.0494436	0.400195	0.0154263	0.901155	0.976551		2076.01	1.03228	0.241986	18.3762	1.81313e-05	0.000659364		1670.78	-0.47936	0.278349	3.08339	0.0790957	0.488127	B				2286.76	0.0618282	0.234097	0.0698344	0.791578	0.94812		1692.11	0.127573	0.250608	0.261673	0.608973	1
ENSMUSG00000003032	Klf4	219.376	0.613411	0.618336	0.851837	0.356033	0.723244		213.328	0.122973	0.334362	0.13271	0.715639	0.869404		227.699	0.362682	0.407378	0.803684	0.369994	0.818807					178.223	-0.00766586	0.262944	0.000833438	0.976969	0.9962		282.696	0.233548	0.430685	0.299121	0.584434	1
ENSMUSG00000003033	Ap1m1	360.835	-0.329753	0.651758	0.303091	0.581951	0.85679		345.786	0.563826	0.213774	7.01488	0.00808349	0.0654726		332.818	-0.558489	0.409365	2.16199	0.141461	0.613739					343.182	-0.00515061	0.183119	0.000797344	0.977473	0.996498		379.22	-0.0306902	0.272171	0.0127145	0.910222	1
ENSMUSG00000003037	Rab8a	714.453	-0.712889	0.379116	3.71386	0.0539625	0.320374		724.151	-0.0955167	0.215503	0.194825	0.658931	0.838802		876.774	-0.302292	0.278213	1.26892	0.25997	0.740375					603.809	-0.0292181	0.182758	0.0254857	0.873163	0.967581		1036.23	0.0114285	0.208899	0.00299451	0.95636	1
ENSMUSG00000003038	Hmgn2	16.2163	-2.52889	1.39673	3.64198	0.0563401	0.328713		19.206	0.602593	0.529052	1.32066	0.250474	0.522458		21.99	-0.718401	0.728462	1.16459	0.280517	0.758089					24.2926	0.733974	0.383394	3.59326	0.0580144	NA		31.8989	0.724497	0.519103	2.02412	0.154818	1
ENSMUSG00000003039	Fam32a	2683.35	0.597263	0.471361	1.37046	0.241733	0.621301		3419.69	-0.0234466	0.29057	0.00658615	0.935319	0.976215		3151.68	0.0861664	0.427193	0.034584	0.85247	0.975877					3229.53	-0.0376087	0.196727	0.03657	0.848343	0.960858		3704.4	0.242323	0.306232	0.635134	0.425478	1
ENSMUSG00000003051	Elf3	80.1954	-1.32434	1.36485	1.25059	0.263439	0.642551		122.769	-2.2325	0.948055	4.60683	0.0318449	0.159958		162.259	2.2377	1.38399	2.47154	0.115925	0.570237					49.8645	-2.419	0.964176	4.226	0.0398091	NA		153.052	-0.242654	0.534612	0.191439	0.661721	1
ENSMUSG00000003062	Stard3nl	13.6122	0.646486	1.46942	0.210903	0.646061	0.883156		24.7297	0.280959	0.439521	0.404497	0.524776	0.754132		25.5578	0.927534	0.662358	1.67006	0.19625	0.683327					24.2216	0.356118	0.32086	1.23216	0.266988	NA		31.9729	0.116246	0.465318	0.0620401	0.8033	1
ENSMUSG00000003068	Stk11	26.3793	3.53459	1.14304	6.87691	0.00873166	0.119344		56.6051	1.34127	0.388387	11.8069	0.000590123	0.0102637		24.7864	1.7317	0.676522	4.91568	0.0266139	0.29582	B				61.4346	-0.224464	0.331753	0.452736	0.501039	NA		36.5619	-0.37222	0.432037	0.726048	0.394167	1
ENSMUSG00000003072	Atp5d	519.293	0.0165421	0.497925	0.00115827	0.972851	0.993237		498.091	-0.338093	0.24463	1.86776	0.171732	0.424907		647.529	0.280267	0.404517	0.525162	0.468648	0.87256		ENSMUSG00000003072			376.058	0.0813394	0.194796	0.173263	0.677228	0.922141		774.852	-0.22714	0.329029	0.468451	0.493701	1
ENSMUSG00000003099	Ppp5c	43.817	-0.845314	1.16897	0.671706	0.412457	0.766324		37.3602	-0.564411	0.456827	1.50978	0.219173	0.486788		51.9899	-0.164812	0.681451	0.0695023	0.792063	0.969495					28.5304	0.0897548	0.422315	0.0453543	0.831354	NA		56.9002	0.212606	0.467892	0.209478	0.647177	1
ENSMUSG00000003119	Cdk12	416.732	1.5731	0.630489	4.61266	0.0317368	0.246576		640.015	1.06189	0.349607	9.34263	0.00223884	0.0272771		429.197	0.341379	0.57152	0.26638	0.605771	0.923159	B				608.255	-0.497299	0.235472	4.51848	0.0335306	0.351252		471.63	-0.276979	0.38073	0.516504	0.472337	1
ENSMUSG00000003123	Lipe	111.788	0.976647	0.659618	2.1016	0.147145	0.511639		122.796	0.563412	0.321111	3.05437	0.0805202	0.275826		101.042	0.0846672	0.39389	0.0453513	0.831359	0.973226					116.396	-0.104533	0.258802	0.160957	0.688277	0.925215		124.707	-0.260257	0.410265	0.394595	0.529894	1
ENSMUSG00000003131	Pafah1b2	191.334	0.225687	0.536186	0.174142	0.676456	0.894796		178.357	-0.365761	0.282116	1.65223	0.198655	0.460693		223.743	0.0112532	0.346879	0.00107725	0.973817	0.996905					160.302	0.271589	0.176079	2.33136	0.126791	0.558498		279.527	0.0863551	0.259492	0.11152	0.73842	1
ENSMUSG00000003134	Tbc1d8	18.1622	0.573918	1.2302	0.179126	0.672125	0.892785		13.7569	0.883503	0.699872	1.60872	0.204672	0.467092		13.5052	-1.25723	0.84788	1.68744	0.193939	0.680429					13.3909	-0.106271	0.443318	0.0575591	0.810396	NA		12.2479	0.249034	0.748757	0.110201	0.739915	1
ENSMUSG00000003135	Cnot11	85.7413	-0.951084	0.717855	2.06563	0.150653	0.517333		73.3473	0.061705	0.361996	0.0286057	0.865693	0.942886		94.9615	-0.511599	0.498492	1.21746	0.26986	0.74755					61.0038	0.0668646	0.286137	0.0520081	0.819605	NA		93.6475	-0.0736075	0.377549	0.0379308	0.845582	1
ENSMUSG00000003153	Slc2a3	3490.52	-0.267611	0.39415	0.484251	0.486503	0.806267		4641.55	-0.190116	0.274207	0.486393	0.485541	0.725942		5158.78	-0.0656556	0.44117	0.0183988	0.892104	0.984426					4299.45	0.0775069	0.18572	0.173424	0.677087	0.922141		5519.12	0.0556194	0.335026	0.027643	0.867951	1
ENSMUSG00000003154	Foxj2	50.4804	-0.10491	0.990155	0.0133818	0.907906	0.977617		29.579	-0.0147096	0.451006	0.00100287	0.974737	0.992237		42.4142	-1.00561	0.545412	3.91255	0.0479268	0.39248					27.7297	0.451646	0.412268	1.13408	0.286907	NA		36.4957	0.152824	0.576985	0.070722	0.790288	1
ENSMUSG00000003161	Sri	935.8	-0.0354432	0.36335	0.00977971	0.921224	0.980738		1000.47	-0.0164996	0.18279	0.00821127	0.927798	0.972786		1062.59	-0.23332	0.257115	0.824172	0.363963	0.816974					1033.74	0.250149	0.136536	3.28579	0.069882	0.451107		1177.03	-0.0887219	0.226395	0.152485	0.696172	1
ENSMUSG00000003166	Dgcr2	98.2561	-0.90352	0.810361	1.53703	0.215061	0.596104		103.033	0.0243364	0.279352	0.00740939	0.931405	0.97427		114.856	-0.446381	0.470508	1.03648	0.308641	0.77691					90.7588	-0.0598772	0.313137	0.0353613	0.850841	NA		114.854	-0.195014	0.3193	0.369103	0.543494	1
ENSMUSG00000003184	Irf3	56.7998	1.74445	0.908716	3.42293	0.064297	0.352912		77.5501	-0.401228	0.372635	1.18186	0.276978	0.550875		79.7406	1.42965	0.451136	8.67559	0.003225	0.104169					61.1578	0.0183944	0.279804	0.00440803	0.947065	NA		125.147	-0.0922691	0.3063	0.0903404	0.763745	1
ENSMUSG00000003198	Zfp959	41.9902	0.00760165	0.967276	6.51337e-05	0.993561	0.999004		38.3122	-0.139181	0.45793	0.0949787	0.757941	0.889942		46.9363	-0.370521	0.515402	0.487492	0.485048	0.880615					34.0545	0.0252045	0.342269	0.00528944	0.942022	NA		60.4806	0.589328	0.387363	2.38276	0.122681	1
ENSMUSG00000003199	Mpnd	89.1828	1.59848	0.7247	4.06581	0.0437597	0.29052		88.0785	-0.128832	0.350652	0.132923	0.71542	0.869359		96.1627	0.773683	0.432294	2.94545	0.0861195	0.504974					72.8082	-0.0601119	0.288169	0.0431926	0.835363	NA		152.943	0.353692	0.322958	1.22787	0.267822	1
ENSMUSG00000003200	Sh3gl1	21.1855	2.23866	1.43895	1.66276	0.197231	0.57447		14.0819	0.457284	0.759744	0.363869	0.546365	0.768755		18.6745	0.252989	1.00896	0.0454055	0.83126	0.973226					14.5461	0.073011	0.500145	0.0195864	0.888698	NA		15.4312	-0.971678	0.797673	1.39515	0.237537	1
ENSMUSG00000003206	Ebi3	7.40568	-1.02026	2.07819	0.314824	0.574735	0.853832		4.4908	1.75802	0.785616	5.07338	0.0242959	0.133748		4.11874	-1.78692	1.43956	1.9047	0.167553	0.648902					5.0392	-0.121376	0.571341	0.0450315	0.831946	NA		3.67388	0.563935	1.10781	0.264105	0.607314	1
ENSMUSG00000003208	Yju2	26.2362	-0.398405	1.34696	0.106748	0.743877	0.92231		30.1797	-0.386892	0.446214	0.7538	0.385276	0.649645		43.0157	0.346214	0.698923	0.252907	0.615036	0.924885					18.5663	0.0098028	0.41521	0.000557002	0.981171	NA		45.3513	-0.428723	0.484208	0.764177	0.382025	1
ENSMUSG00000003226	Ranbp2	154.458	0.0250507	0.540478	0.00218058	0.962755	0.991352		156.865	0.194219	0.337784	0.32741	0.567188	0.781511		197.149	0.0170447	0.331151	0.00268771	0.958654	0.996196					130.485	-0.0902609	0.227325	0.157072	0.691867	0.925237		200.05	-0.235753	0.263618	0.786678	0.375107	1
ENSMUSG00000003228	Grk5	219.28	0.33254	0.464082	0.510741	0.474818	0.800317		276.317	0.647985	0.279744	5.45328	0.0195316	0.117041		243.398	-0.282142	0.405814	0.424157	0.51487	0.898333					250.689	-0.312793	0.202111	2.41928	0.11985	0.541801		281.644	0.402542	0.346425	1.38179	0.239797	1
ENSMUSG00000003233	Dvl3	57.8791	0.19921	0.702097	0.0802273	0.77699	0.93428		55.3484	-0.530049	0.443815	1.39235	0.238009	0.509525		68.5272	0.155635	0.485139	0.106453	0.744219	0.957775		ENSMUSG00000003233			39.5078	-0.264208	0.363907	0.524647	0.468866	NA		66.1549	-0.543674	0.445234	1.43626	0.230745	1
ENSMUSG00000003234	Abcf3	39.8059	2.15385	1.2851	1.8447	0.174402	0.549538		36.8395	-0.183348	0.432806	0.17386	0.676704	0.848333		40.836	0.677197	0.692248	0.818116	0.365732	0.817267					34.786	0.129952	0.393165	0.107563	0.742936	NA		48.1371	0.341087	0.466126	0.546654	0.459688	1
ENSMUSG00000003235	Eif2b5	75.6118	1.43402	0.657775	4.25409	0.039156	0.273702		84.4963	0.384093	0.397777	0.898774	0.343111	0.61159		89.1583	0.856904	0.575168	2.19313	0.138628	0.610026					75.4142	0.0660728	0.296165	0.0506132	0.822	NA		110.546	0.185944	0.4889	0.146543	0.701861	1
ENSMUSG00000003269	Cyth2	108.106	0.108779	0.697841	0.027008	0.869463	0.967232		123.827	-0.16956	0.29518	0.332633	0.564113	0.78018		135.38	0.140094	0.461894	0.0902301	0.763885	0.964278					102.274	-0.0949239	0.219816	0.185287	0.666869	NA		138.917	-0.656951	0.339501	3.57596	0.0586217	1
ENSMUSG00000003271	Sult2b1	3.59246	-1.14257	3.65744	0.171207	0.679041	NA		9.40505	-0.85238	0.970607	0.559343	0.454525	0.705084		13.5498	2.70124	1.31404	4.11055	0.0426164	0.372774					2.47509	-0.979741	1.12098	1.02167	0.312124	NA		12.7637	-0.889397	1.0334	0.698239	0.403376	1
ENSMUSG00000003273	Car11	1.53414	5.34456	5.79703	0.93872	0.332607	NA		1.99212	-0.487881	1.78363	0.0759416	0.782874	NA		2.37151	4.40488	2.38252	2.83063	0.0924821	NA					2.85521	1.9245	1.29618	2.52338	0.11217	NA		3.32828	-0.962108	1.38728	0.456788	0.499129	1
ENSMUSG00000003283	Hck	599.503	-0.0112027	0.471547	0.000608613	0.980318	0.996306		555.658	0.66933	0.244005	7.5963	0.00584884	0.0527614		503.05	-0.361738	0.387471	1.00734	0.315542	0.782102					583.225	0.0972016	0.231171	0.174385	0.676243	0.922132		542.044	-0.122258	0.283638	0.18447	0.66756	1
ENSMUSG00000003299	Mrpl4	123.218	-0.151198	0.596892	0.0602371	0.806122	0.946253		105.979	-0.255064	0.334533	0.565201	0.452172	0.703819		138.712	0.0279325	0.48057	0.00361638	0.952047	0.995606					84.923	0.254314	0.223851	1.25516	0.262569	NA		153.47	-0.412728	0.395815	1.05673	0.303962	1
ENSMUSG00000003308	Keap1	107.228	1.44058	0.614671	4.69047	0.0303304	0.241397		122.363	0.0818318	0.271085	0.0891029	0.765321	0.894636		128.528	0.869989	0.338683	5.94281	0.0147775	0.225064					106.722	0.13065	0.265513	0.227308	0.633527	NA		168.519	-0.175732	0.260646	0.451044	0.50184	1
ENSMUSG00000003309	Ap1m2	14.1148	-1.06506	1.94269	0.125137	0.723529	0.91245		24.4966	-1.21291	0.813272	1.89456	0.168688	0.421524		26.9704	2.23672	1.02094	4.49986	0.0338976	0.33552					17.3536	0.183458	0.64511	0.0843355	0.771506	NA		32.3625	0.207235	0.689947	0.0915721	0.762188	1
ENSMUSG00000003316	Glg1	288.538	1.2146	0.533599	4.47897	0.0343143	0.257441		381.847	0.978641	0.379182	6.57871	0.0103206	0.0778071		307.81	0.286801	0.596453	0.200242	0.654526	0.934636					343.505	-0.372083	0.273289	1.84007	0.174943	0.6184		366.607	-0.511763	0.456858	1.20223	0.272876	1
ENSMUSG00000003344	Btbd2	37.2646	0.0176615	0.922829	0.000330317	0.9855	0.997325		20.1433	0.236914	0.524142	0.203097	0.652233	0.834767		32.1609	-0.83573	0.671425	1.67564	0.195505	0.682331					18.6264	0.0978696	0.477329	0.0411015	0.839342	NA		29.3106	-0.0116798	0.623456	0.000352928	0.985012	1
ENSMUSG00000003345	Csnk1g2	431.83	-0.475863	0.451983	1.16396	0.280646	0.656594		473.305	-0.0427099	0.231853	0.0341992	0.853284	0.93696		558.078	-0.208299	0.330138	0.400636	0.526761	0.901328					396.088	0.00327557	0.16896	0.000375543	0.984539	0.998604		693.276	-0.00566241	0.275151	0.000424066	0.98357	1
ENSMUSG00000003346	Abhd17a	89.7682	0.367636	0.636971	0.320532	0.571288	0.852609		122.138	-0.152637	0.27759	0.30653	0.579817	0.790512		121.781	0.378241	0.355007	1.0475	0.306084	0.775563					114.701	0.125651	0.226438	0.311133	0.576986	0.88828		170.64	-0.201613	0.340186	0.346111	0.556323	1
ENSMUSG00000003348	Mob3a	10.5887	1.49531	2.51123	0.128443	0.720052	0.911689		9.81103	-0.653224	0.801688	0.656431	0.417823	0.676759		13.0611	0.942415	1.28778	0.463821	0.495844	0.888054					10.6732	1.00317	0.675366	2.08908	0.148356	NA		18.4395	0.338435	0.617149	0.305995	0.580148	1
ENSMUSG00000003352	Cacnb3	1.8577	-1.79897	4.77173	0.166781	0.682989	NA		8.82139	-0.686713	0.78652	0.775311	0.378579	0.644511		7.04061	1.31193	1.19698	1.15802	0.281876	0.758582					5.01601	-1.0085	0.708359	1.73466	0.187816	NA		7.823	-0.0224719	0.962703	0.00053902	0.981477	1
ENSMUSG00000003355	Fkbp11	5.83599	-1.05053	2.2556	0.270113	0.603256	NA		6.66	-1.26834	1.08321	1.30289	0.253685	0.525491		9.43231	0.986285	1.4309	0.541333	0.461881	0.868447					3.88997	-0.0593628	0.81119	0.00444767	0.946828	NA		13.8813	0.971219	0.822688	1.46507	0.226125	1
ENSMUSG00000003360	Ddx23	32.4966	-0.635985	1.18477	0.356398	0.550513	0.843224		29.2666	0.0900753	0.496019	0.0315446	0.859031	0.939088		38.4075	-0.470245	0.600849	0.716697	0.39723	0.837512					23.1292	-0.0108236	0.376326	0.000806976	0.977337	NA		34.1542	-1.04204	0.588067	2.91353	0.0878396	1
ENSMUSG00000003363	Pld3	429.944	-0.082101	0.4908	0.0268384	0.86987	0.967232		573.107	0.614031	0.332246	3.50809	0.0610696	0.236415		434.724	-0.371872	0.431144	0.756028	0.384574	0.830259					591.172	-0.20284	0.256053	0.634068	0.425867	0.812494		653.115	-0.0333037	0.37364	0.00792375	0.92907	1
ENSMUSG00000003379	Cd79a	78.315	-0.278933	0.864273	0.125149	0.723516	0.91245		74.8338	-0.885163	0.420365	4.20627	0.0402748	0.184733		110.065	0.391286	0.511133	0.64652	0.42136	0.847711					36.232	-0.466921	0.453309	1.08061	0.298561	NA		128.148	0.0188751	0.355767	0.00282744	0.957594	1
ENSMUSG00000003380	Rabac1	1421.19	0.245667	0.580813	0.146722	0.701688	0.904627		1933.28	-0.759111	0.1966	14.5952	0.000133253	0.00323604		2232.09	0.510556	0.411161	1.2924	0.255606	0.736766	B				1540.68	0.0472291	0.147568	0.101708	0.74979	0.943465		2614.75	-0.247982	0.28766	0.726396	0.394054	1
ENSMUSG00000003382	Etv3	125.137	0.123901	0.599818	0.0416512	0.838286	0.958372		90.5778	0.462786	0.366875	1.59683	0.206353	0.469016		122.847	-0.711302	0.470052	2.30947	0.128588	0.59581					76.8612	-0.260312	0.297554	0.783254	0.376148	NA		106.534	-0.372109	0.421865	0.759845	0.383377	1
ENSMUSG00000003402	Prkcsh	176.958	-1.21033	0.629649	4.36823	0.036615	0.266142		122.774	-0.167715	0.317661	0.280344	0.596476	0.803165		189.434	-0.86743	0.447298	4.39818	0.0359773	0.34335					93.8487	-0.0269059	0.309827	0.00764719	0.930315	NA		178.25	-0.335032	0.289097	1.31596	0.251318	1
ENSMUSG00000003418	St8sia6	84.1553	1.07626	0.878346	1.1844	0.276463	0.652677		86.9405	-1.06799	0.555357	3.40907	0.0648388	0.244692		115.953	0.954156	0.627263	2.17728	0.140062	0.612504					55.087	-0.333257	0.437046	0.524167	0.469069	NA		104.009	-1.17692	0.531221	4.44182	0.0350688	1
ENSMUSG00000003420	Fcgrt	291.579	1.24604	0.500359	5.47797	0.0192576	0.190599		256.576	1.28439	0.303383	17.8136	2.43636e-05	0.000847489		197.513	-0.238321	0.351929	0.46184	0.496765	0.888054	B				268.611	-0.0667359	0.249699	0.0698291	0.791586	0.94812		242.357	-0.188368	0.282695	0.437625	0.508271	1
ENSMUSG00000003421	Nosip	158.431	-0.90129	0.568994	2.41831	0.119924	0.470653		143.781	-0.581653	0.277122	4.39296	0.0360875	0.172599		194.068	-0.187339	0.396251	0.246164	0.619789	0.92589					120.717	0.276028	0.215099	1.63119	0.201539	0.648186		228.158	-0.000620828	0.270555	5.28873e-06	0.998165	1
ENSMUSG00000003423	Pih1d1	100.066	1.89708	0.583595	9.39419	0.00217675	0.0538855		87.9664	0.525506	0.320998	2.59942	0.106903	0.326512		92.428	0.605689	0.361554	2.63922	0.104255	0.542425					72.1931	-0.220244	0.273546	0.635059	0.425506	NA		98.1347	-0.241784	0.300878	0.637399	0.424654	1
ENSMUSG00000003429	Rps11	753.891	1.80812	0.5617	7.8656	0.00503841	0.0901853		990.265	-0.112345	0.330933	0.116459	0.732907	0.878085		853.157	1.16267	0.361866	8.69102	0.00319781	0.103951					896.979	-0.00424967	0.221801	0.000367585	0.984703	0.998604		1501.3	0.270626	0.207291	1.73772	0.187428	1
ENSMUSG00000003435	Supt5	12.2227	3.10309	2.31609	0.971572	0.324288	0.695993		10.7296	0.184726	0.600312	0.0952067	0.757659	0.889899		13.7496	0.462223	1.14633	0.103012	0.748245	0.958073					15.3486	0.639245	0.472863	1.68937	0.193684	NA		13.2255	0.612116	0.707574	0.759876	0.383367	1
ENSMUSG00000003437	Paf1	116.604	-0.171288	0.852461	0.0440511	0.833759	0.957464		88.8199	0.259915	0.296799	0.764113	0.382044	0.647045		125.691	-0.582655	0.504894	1.32245	0.250153	0.732712					71.7027	0.0380151	0.285531	0.0175142	0.894715	NA		113.454	0.144488	0.291143	0.247821	0.618613	1
ENSMUSG00000003438	Timm50	43.6382	-0.755721	0.881562	0.760849	0.383063	0.743173		50.8772	-0.118186	0.534983	0.0492554	0.824364	0.923865		62.7648	-0.120314	0.57609	0.0441264	0.833619	0.973988					42.9784	0.17298	0.345413	0.234581	0.628148	NA		70.4166	-0.136291	0.441907	0.0943851	0.758675	1
ENSMUSG00000003444	Med29	17.3207	6.67259	2.0469	6.95019	0.00838102	0.117536		24.1254	-0.642135	0.516073	1.50884	0.219316	0.486962		28.113	4.07719	1.00241	9.58584	0.00196083	0.0798105					23.9159	0.738594	0.344033	4.31456	0.0377875	NA		34.617	0.0756973	0.549485	0.0188108	0.89091	1
ENSMUSG00000003452	Bicd1	32.7541	-3.78784	1.38518	8.22457	0.00413271	0.0804138		26.0769	-0.281044	0.586193	0.233165	0.629187	0.822558		44.5342	-1.84313	0.797845	4.79009	0.028624	0.308567					24.7238	0.195469	0.367024	0.264479	0.60706	NA		32.3604	0.387607	0.668817	0.338528	0.56068	1
ENSMUSG00000003458	Ncstn	47.9103	-0.104923	0.841251	0.0141565	0.90529	0.977122		48.0056	0.076177	0.387783	0.0382223	0.844998	0.933607		53.1765	-0.101724	0.542102	0.0372969	0.846862	0.974455		ENSMUSG00000003458			41.8402	-0.0388739	0.348272	0.0126009	0.910622	NA		60.8977	-0.0537649	0.47482	0.0128236	0.909839	1
ENSMUSG00000003464	Pex19	251.466	0.665902	0.512259	1.50232	0.220314	0.601859		359.465	0.754167	0.296981	6.44946	0.0110986	0.0819226		250.283	0.317392	0.467685	0.470815	0.492613	0.885225					374.619	-0.0918668	0.306513	0.0897241	0.764528	0.947044		265.687	-0.234165	0.338015	0.471837	0.492143	1
ENSMUSG00000003469	Phyhip	39.8875	-0.190225	0.888925	0.0439039	0.834033	0.957599		67.0768	0.854087	0.523174	2.64538	0.103852	0.320948		31.1913	-0.373045	0.705691	0.296622	0.586008	0.917788					68.6557	-0.251301	0.4238	0.353046	0.552394	NA		28.0807	-0.790166	0.844231	0.815217	0.366582	1
ENSMUSG00000003477	Inmt	12.76	9.17908	2.77071	10.4273	0.00124168	0.0385393		6.77543	-5.06378	1.70594	7.31305	0.00684557	0.0587507		10.3052	6.46745	2.14778	6.07511	0.01371	0.217063	A				3.20236	2.14639	1.24499	1.73937	0.187219	NA		9.0762	-1.9156	1.44068	1.51208	0.218822	1
ENSMUSG00000003484	Cyp4f18	323.616	-1.77542	0.420653	19.6061	9.51657e-06	0.00121227		262.644	-0.888745	0.30578	8.26901	0.00403274	0.0410138		457.642	-0.653978	0.270632	6.4225	0.0112683	0.195739	C				218.888	0.459746	0.258814	3.075	0.0795045	0.473212		460.813	-0.133432	0.211217	0.395329	0.529511	1
ENSMUSG00000003500	Impdh1	83.9692	-0.50766	1.01313	0.293512	0.587979	0.858129		61.4365	-0.676406	0.450328	2.18447	0.139409	0.381172		92.269	-0.212282	0.640979	0.121982	0.726895	0.953257					42.7462	0.169921	0.435285	0.150753	0.697816	NA		116.968	0.139877	0.431955	0.105859	0.744909	1
ENSMUSG00000003518	Dusp3	575.265	-0.125596	0.563731	0.0431544	0.835435	0.957858		642.079	-0.178693	0.38106	0.221016	0.638267	0.827111		893.585	0.244771	0.633773	0.108139	0.742272	0.957387					467.377	-0.346171	0.27214	1.58622	0.207868	0.653259		910.313	-0.138986	0.441708	0.0974315	0.754934	1
ENSMUSG00000003526	Prodh	7.04021	8.16467	3.46364	5.09322	0.0240195	NA		3.35866	-1.38002	1.69866	0.695157	0.404416	NA		6.75891	4.27496	2.23668	0.996678	0.318116	0.784043					1.94855	0.397302	1.26021	0.14912	0.699378	NA		7.07455	0.868825	1.2489	0.470991	0.492532	1
ENSMUSG00000003527	Ess2	30.4763	-1.04321	0.998932	1.07889	0.298945	0.673094		28.2872	0.00761989	0.395044	0.000367388	0.984708	0.996261		30.89	-0.384548	0.637088	0.413657	0.520119	0.900409					22.8092	-0.376233	0.344614	1.21771	0.26981	NA		41.8062	-0.0955887	0.424003	0.050458	0.822268	1
ENSMUSG00000003528	Slc25a1	110.59	1.1125	1.31506	0.657758	0.417352	0.768855		120.173	-2.3689	0.839715	6.73244	0.00946751	0.0733006		197.792	2.00117	0.820925	5.42248	0.0198791	0.25898					46.01	0.806952	0.448814	3.01664	0.0824138	NA		180.448	-1.74298	0.630592	6.48314	0.0108902	1
ENSMUSG00000003531	Dgcr6	28.5776	0.944474	2.0626	0.0851546	0.77043	0.931806		30.2428	-0.488856	0.666021	0.508567	0.47576	0.720979		36.18	1.26769	1.10101	1.04566	0.306509	0.775577					25.5817	0.163184	0.442192	0.119671	0.729391	NA		42.1385	0.523563	0.624311	0.724877	0.394549	1
ENSMUSG00000003534	Ddr1	10.0415	8.26744	2.63733	8.51057	0.0035309	0.072304		20.5483	-0.76953	0.542187	1.92445	0.165367	0.416264		23.4958	7.27678	1.40726	31.4963	1.99825e-08	2.55954e-05	F				15.9389	0.7404	0.42825	2.90535	0.088286	NA		30.0753	-0.18101	0.525568	0.117742	0.731496	1
ENSMUSG00000003541	Ier3	185.428	0.196834	0.555061	0.12658	0.722005	0.91229		285.598	-0.730378	0.40816	2.94221	0.0862926	0.288116		300.109	1.21205	0.567223	5.03025	0.0249082	0.286443					312.956	0.839166	0.315947	6.57135	0.0103634	0.233731		338.879	-0.609361	0.477295	1.55058	0.21305	1
ENSMUSG00000003545	Fosb	27.3285	-3.46175	1.25404	9.82156	0.00172478	0.0465615		6.07504	-0.108667	1.05359	0.00922044	0.923502	0.970895		24.2017	-3.02929	0.891107	14.9778	0.000108784	0.0136786	D				4.17965	-0.362076	0.859963	0.177183	0.673805	NA		6.70608	0.177448	0.873499	0.0411381	0.839272	1
ENSMUSG00000003546	Klc4	145.231	-0.734104	0.794328	1.05418	0.304545	0.677637		180.638	0.185336	0.264265	0.488799	0.484464	0.725084		183.936	-0.337077	0.478517	0.558694	0.454787	0.863641		ENSMUSG00000003546			158.403	-0.195011	0.181626	1.17686	0.277997	0.718972		209.706	0.0421094	0.301994	0.0195551	0.888787	1
ENSMUSG00000003559	As3mt	54.1805	-1.66785	0.76786	5.05122	0.0246087	0.216659		43.1665	-0.831578	0.39602	4.36766	0.0366273	0.174601		71.9422	-0.794885	0.435013	3.54835	0.0596047	0.43359					28.5851	-0.199948	0.324995	0.376141	0.539676	NA		71.8967	0.0378067	0.383665	0.00976648	0.921277	1
ENSMUSG00000003573	Homer3	157.681	-1.17945	0.539111	5.13683	0.0234234	0.211761		201.914	-1.05205	0.277505	14.0569	0.000177364	0.00413647		310.397	0.124282	0.427286	0.0711825	0.789623	0.969417	B				119.961	-0.131825	0.218626	0.359909	0.548557	0.874252		323.817	0.0930919	0.36186	0.0666129	0.796334	1
ENSMUSG00000003575	Crtc1	51.8699	-0.833676	0.925663	0.966907	0.325453	0.697138		77.7592	-0.30343	0.324122	0.879722	0.348278	0.616119		85.8568	0.162278	0.495748	0.107097	0.743474	0.957775					56.2662	-0.381061	0.269922	1.91109	0.166843	NA		88.3648	-0.674896	0.426073	2.3956	0.121677	1
ENSMUSG00000003581	Rnf215	23.6763	2.04296	1.07843	3.01716	0.0823878	0.394178		17.8087	1.10232	0.551219	4.07656	0.0434822	0.193387		21.2864	0.021436	0.836315	0.000508195	0.982015	0.998121					19.6294	0.0619883	0.508345	0.0121202	0.912336	NA		15.7133	-0.680032	0.846431	0.624433	0.429405	1
ENSMUSG00000003585	Sec14l2	1.67359	5.60221	4.23902	1.51421	0.218497	NA		4.1325	-0.940523	1.25374	0.595423	0.44033	0.693652		4.42948	4.61403	1.82707	5.71077	0.0168611	0.239612					2.77951	0.111892	1.07536	0.0137825	0.906544	NA		5.309	-0.467832	1.24738	0.137632	0.710646	1
ENSMUSG00000003604	Aven	75.5362	0.815591	0.655544	1.43603	0.230783	0.612062		74.7416	-0.167476	0.31945	0.275365	0.599755	0.805172		87.6605	0.40039	0.362449	1.13717	0.286251	0.762129					60.8939	0.0334279	0.266701	0.0153068	0.901536	NA		119.94	0.183634	0.260537	0.5017	0.478754	1
ENSMUSG00000003617	Cp	24.1929	5.94673	1.52586	11.6163	0.000653749	0.0257064		26.5711	0.936542	0.801066	1.34211	0.246662	0.517518		9.16761	2.75239	1.09833	5.60057	0.0179546	0.246207	A				28.9059	-0.17861	0.569595	0.0730113	0.787002	NA		11.6848	-0.258962	1.12775	0.0517761	0.820001	1
ENSMUSG00000003623	Crot	94.1699	0.366159	0.743991	0.229618	0.631807	0.877585		121.593	-1.77959	0.410628	17.0802	3.58344e-05	0.00112126		182.826	1.35154	0.562374	5.56785	0.0182932	0.249587	B				74.5298	0.623768	0.265892	5.01274	0.0251614	NA		188.669	-0.849635	0.426493	3.70084	0.0543851	1
ENSMUSG00000003644	Rps6ka1	305.181	-0.715241	0.599948	1.64006	0.200317	0.577755		296.913	0.139511	0.28897	0.233891	0.628654	0.822275		336.846	-0.524862	0.438726	1.58465	0.208092	0.699449					282.895	0.171462	0.20667	0.671143	0.412653	0.807871		384.46	-0.213688	0.335751	0.399463	0.527367	1
ENSMUSG00000003660	Snrnp200	345.868	-0.800252	0.714871	1.54569	0.213773	0.594819		320.389	-0.312407	0.256977	1.46087	0.226792	0.496055		465.333	-0.202151	0.465027	0.211422	0.645655	0.931826					257.395	0.292016	0.197984	2.1233	0.145073	0.584566		503.241	-0.382441	0.282973	1.77632	0.182602	1
ENSMUSG00000003662	Ciao1	163.022	-0.817895	0.682263	1.67945	0.194997	0.5724		188.761	-0.269287	0.245008	1.18802	0.27573	0.549403		244.928	0.145489	0.456269	0.113374	0.736335	0.956137					156.357	0.276098	0.214236	1.62106	0.202944	0.648186		249.708	-0.302827	0.283325	1.12064	0.289782	1
ENSMUSG00000003680	Taf6l	445.489	-0.138137	0.555437	0.0556699	0.813476	0.949151		478.914	-0.444831	0.213438	4.30161	0.0380763	0.178961		536.498	-0.122554	0.364695	0.108814	0.741499	0.956915					423.946	0.0871097	0.192922	0.198001	0.656339	0.915094		600.817	0.150503	0.232661	0.421863	0.516009	1
ENSMUSG00000003721	Insig2	172.769	-0.813921	0.531362	2.32248	0.127517	0.481297		248.725	0.0206251	0.393849	0.00279584	0.957831	0.985548		261.064	-0.023126	0.472159	0.002356	0.961287	0.996196					252.779	0.266009	0.273272	0.916994	0.338266	0.764117		304.513	0.630019	0.424001	2.28083	0.130982	1
ENSMUSG00000003731	Kpna6	84.8446	0.24059	0.732211	0.108027	0.742402	0.921527		93.4317	0.167135	0.278334	0.364055	0.546263	0.768686		85.2305	-0.189724	0.385318	0.244611	0.620895	0.926089					91.9153	0.0260683	0.249662	0.0109962	0.916485	NA		86.0436	-0.430571	0.314214	1.83494	0.175546	1
ENSMUSG00000003746	Man1a	681.769	-1.29096	0.4651	8.9606	0.00275864	0.0627053		579.304	-0.59517	0.213161	7.65388	0.00566504	0.0516998		906.53	-0.549004	0.311737	3.47442	0.0623246	0.440842					415.544	-0.0734936	0.183698	0.15962	0.689507	0.925215		858.403	-0.19136	0.239441	0.630001	0.427355	1
ENSMUSG00000003778	Brd8	149.044	0.7053	0.628671	1.31021	0.252356	0.629681		159.374	0.328431	0.262163	1.59517	0.206589	0.469164		155.047	0.0655183	0.347586	0.0354474	0.850661	0.975479					164.948	0.150557	0.191456	0.615687	0.432654	0.815813		175.27	-0.363509	0.258431	1.93354	0.164372	1
ENSMUSG00000003808	Farsa	375.108	2.6241	0.505316	20.6014	5.65546e-06	0.000768452		479.658	0.934813	0.290154	10.1853	0.00141561	0.0197733		341.347	1.39126	0.390889	11.1167	0.000855543	0.0470649	G				481.211	-0.0930602	0.221378	0.165697	0.683965	0.923127		443.495	-0.501504	0.327017	2.26267	0.132525	1
ENSMUSG00000003809	Gcdh	17.217	-0.146858	1.29862	0.0145231	0.904078	0.976722		22.389	0.0948635	0.505405	0.0355215	0.850507	0.93615		23.4678	-0.0449871	0.668667	0.00438926	0.947178	0.994946					23.3322	0.269148	0.313105	0.722819	0.395221	NA		29.3609	0.375652	0.527393	0.516735	0.472238	1
ENSMUSG00000003810	Mast2	306.297	-0.962674	0.453408	4.7648	0.0290474	0.236814		333.073	-0.700553	0.317591	4.86126	0.0274663	0.144675		505.019	-0.14342	0.488956	0.0711774	0.78963	0.969417					249.031	0.126447	0.207971	0.36406	0.54626	0.873795		570.039	-0.0545315	0.359772	0.0228784	0.879774	1
ENSMUSG00000003812	Dnase2a	80.8107	0.477163	0.720318	0.421924	0.515979	0.824248		90.1771	-0.157785	0.335692	0.222463	0.637169	0.826655		107.168	0.492885	0.435017	1.26736	0.260262	0.740788					91.5399	0.580864	0.351839	2.59234	0.107382	NA		132.886	0.507397	0.358738	2.0649	0.150725	1
ENSMUSG00000003813	Rad23a	284.042	2.64379	1.8983	0.877981	0.348755	0.716555		444.323	1.73997	0.509231	11.4821	0.000702692	0.0117259		305.623	0.824302	1.30128	0.231123	0.630693	0.928683	B				430.586	-0.551263	0.401283	1.84894	0.173907	0.617051		288.495	-0.346771	0.822325	0.171997	0.678343	1
ENSMUSG00000003814	Calr	1599.58	0.85045	0.363556	5.0392	0.0247799	0.217416		1959.27	-0.101754	0.234322	0.187638	0.66489	0.841543		2045.78	0.729026	0.325362	4.75091	0.0292827	0.313604					1440.89	-0.32624	0.167046	3.90302	0.0481995	0.402231		2561.42	-0.258599	0.286641	0.797673	0.37179	1
ENSMUSG00000003824	Syce2	9.54625	0.777442	1.68372	0.17088	0.679331	0.89548		28.0381	-0.0482215	0.608665	0.00639683	0.936253	0.976481		19.4227	1.25318	0.865723	1.47604	0.224396	0.713503					27.7188	-0.0456662	0.402976	0.0121693	0.91216	NA		25.7163	0.155536	0.710052	0.0478359	0.826873	1
ENSMUSG00000003847	Nfat5	104.826	0.435495	0.652963	0.471709	0.492202	0.808915		108.079	0.734724	0.361929	4.11587	0.0424827	0.190471		101.674	-0.409604	0.455083	0.856997	0.35458	0.811764					104.491	-0.320015	0.229268	1.92736	0.165047	NA		94.8453	-0.391813	0.369746	1.094	0.295586	1
ENSMUSG00000003848	Nob1	20.0347	-0.726112	1.76172	0.087757	0.767048	0.930159		21.2462	-0.783603	0.647039	1.39787	0.237081	0.508514		31.6926	0.462472	0.906743	0.244463	0.621001	0.926089					17.6165	0.437485	0.491182	0.747797	0.387175	NA		33.8926	-0.719979	0.583868	1.44944	0.228618	1
ENSMUSG00000003849	Nqo1	102.413	0.153126	0.616682	0.057973	0.809729	0.947939		173.599	1.17729	0.364546	10.475	0.00121003	0.0176684		104.077	-0.450223	0.515627	0.740655	0.389451	0.833538	B				225.354	0.158612	0.357447	0.195696	0.658218	0.915094		120.46	0.658147	0.437133	2.35744	0.124687	1
ENSMUSG00000003865	Gys1	66.0654	-0.869107	0.936834	1.04299	0.307126	0.680017		67.0513	0.0914621	0.34561	0.0682232	0.793942	0.910901		84.9999	0.129363	0.609557	0.0539644	0.816303	0.972957					57.9819	0.4431	0.334247	1.66478	0.196959	NA		90.7	-0.156671	0.400144	0.152213	0.69643	1
ENSMUSG00000003868	Ruvbl2	21.9376	-0.835632	1.67116	0.317083	0.573366	0.853832		15.811	-1.64574	0.73749	4.78694	0.0286763	0.148817		26.3695	0.368947	0.868601	0.20376	0.651703	0.933433					8.88971	0.213027	0.601834	0.121765	0.727128	NA		25.8852	-0.463281	0.554777	0.676347	0.410848	1
ENSMUSG00000003873	Bax	49.283	0.360903	0.757931	0.227009	0.63375	0.87768		59.8281	1.05369	0.353738	8.8107	0.0029947	0.0332511		48.6073	-0.186412	0.512801	0.143228	0.705093	0.949291	B				56.8796	-0.274575	0.261786	1.11747	0.290464	NA		68.0598	0.887613	0.412208	4.85733	0.0275289	1
ENSMUSG00000003882	Il7r	639.108	0.369085	0.372544	0.974923	0.323455	0.695236		476.201	0.998968	0.477861	4.4034	0.0358673	0.171749		587.478	-0.839592	0.390987	4.46082	0.0346809	0.336551					625.406	0.52844	0.368486	1.98099	0.159286	0.603111		605.43	0.250682	0.33586	0.563904	0.452692	1
ENSMUSG00000003923	Tfam	152.432	0.767568	0.615788	1.42574	0.232462	0.612823		147.21	-0.302743	0.430656	0.492431	0.482845	0.724393		172.989	0.15962	0.362535	0.176771	0.674163	0.937795					123.897	-0.0209775	0.33207	0.00388105	0.950325	0.987781		224.281	-0.0923927	0.264647	0.121364	0.727559	1
ENSMUSG00000003929	Zfp81	53.439	-0.898973	1.04988	0.767754	0.380913	0.742688		46.3065	-0.153536	0.423107	0.130041	0.718389	0.87073		66.5903	-0.438112	0.456018	1.05383	0.304626	0.774273					33.1325	-0.428774	0.386475	1.22907	0.267587	NA		59.3881	-0.397054	0.43589	0.804565	0.369732	1
ENSMUSG00000003948	Mmd	6111.75	0.0429646	0.393675	0.011662	0.914003	0.977917		9345.79	0.1557	0.338253	0.21594	0.642151	0.829383		8419.94	-0.0338706	0.52939	0.00334086	0.953908	0.99606					8105.27	-0.364328	0.182447	4.07422	0.0435423	0.383583		8493.03	-0.309029	0.389155	0.613539	0.433459	1
ENSMUSG00000003949	Hlf	10.8179	0.632712	1.48664	0.183356	0.668505	0.892513		14.0293	-0.165815	0.917337	0.0293112	0.864063	0.941894		11.4265	0.761182	1.26584	0.426018	0.513949	0.897229					30.0332	0.474425	0.961021	0.926066	0.335887	NA		11.0216	-0.492028	0.950781	0.260536	0.609752	1
ENSMUSG00000003955	Fam162a	8.32123	-0.0537513	1.55497	0.00120753	0.972279	0.993218		6.60148	-0.979607	0.745355	1.69625	0.19278	0.453483		9.77802	-0.12768	0.866256	0.021899	0.882356	0.982747					7.41852	1.12439	0.482974	5.3557	0.0206546	NA		13.0821	0.632082	0.634634	1.02858	0.310492	1
ENSMUSG00000003970	Rpl8	8441.7	-0.339304	0.396311	0.800224	0.371026	0.734552		9725.4	-0.518268	0.22041	5.44605	0.0196127	0.117245		12658.9	0.247637	0.266249	0.872157	0.350359	0.809109					7868.13	0.253458	0.168899	2.21495	0.136679	0.567171		16205.7	0.0636622	0.186958	0.116498	0.732864	1
ENSMUSG00000003992	Ssbp2	316.517	0.936913	0.556798	2.32867	0.12701	0.480127		549.324	1.21769	0.322531	14.4623	0.000142996	0.00343214		319.963	0.0318002	0.482293	0.00366939	0.951697	0.995606	B				875.66	0.152038	0.382023	0.145207	0.703158	0.927324		460.037	0.31286	0.423219	0.556365	0.455728	1
ENSMUSG00000004018	Fancl	22.7869	-1.26766	1.48324	0.533441	0.465164	0.795686		30.0287	-0.729638	0.572745	1.58215	0.208451	0.471711		37.614	-0.175949	0.730758	0.0488128	0.825142	0.973226					26.5195	0.279851	0.371467	0.566777	0.451542	NA		36.5827	-0.750828	0.518442	1.98318	0.159056	1
ENSMUSG00000004032	Gstm5	1795.78	1.46622	0.58716	4.82803	0.0280006	0.233134		2287.74	-0.261075	0.349977	0.566421	0.451685	0.703505		2154	0.646015	0.523381	1.10292	0.293626	0.766334					2097.45	-0.0515353	0.252501	0.0410524	0.839437	0.956569		2758.5	0.203589	0.402818	0.256576	0.612483	1
ENSMUSG00000004035	Gstm7	4.48144	5.93988	3.4902	2.00699	0.156575	NA		5.23683	-0.699086	1.48789	0.214423	0.643323	0.829705		4.49687	3.0624	1.96062	1.81979	0.177338	0.660678					4.15783	-0.210653	1.35561	0.0182796	0.892452	NA		5.25075	0.688478	1.29282	0.291109	0.589511	1
ENSMUSG00000004040	Stat3	438.022	-0.335641	0.442824	0.599227	0.438873	0.778822		408.506	0.580073	0.252059	5.31133	0.0211872	0.123379		414.03	-0.852554	0.34579	6.57441	0.0103455	0.186351					426.058	0.0525491	0.182033	0.0814565	0.775333	0.94812		472.631	0.0285587	0.304168	0.00884334	0.925078	1
ENSMUSG00000004043	Stat5a	19.1248	0.0639365	1.57101	0.00103267	0.974364	0.993978		20.7468	0.998813	0.584293	2.84477	0.0916715	0.297334		23.8066	-0.132341	0.940803	0.017696	0.894173	0.985325					21.293	-0.121292	0.393479	0.0903601	0.76372	NA		25.0821	-1.40922	0.697809	3.83824	0.050096	1
ENSMUSG00000004044	Cavin1	3591.83	-2.74016	0.53205	32.7849	1.02941e-08	3.40234e-06		2802.95	-1.22743	0.287177	17.6563	2.64632e-05	0.000903878		6030.29	-0.675436	0.430557	2.45922	0.116837	0.572916	C				1440.3	0.162033	0.251073	0.394809	0.529782	0.864806		5570.44	-0.0527152	0.293659	0.0320507	0.857916	1
ENSMUSG00000004054	Map3k11	95.117	4.88388	1.37991	5.94486	0.0147603	0.164225		74.0071	0.866501	0.383015	5.1825	0.0228155	0.128783		58.073	1.28471	0.858825	1.41959	0.233472	0.721417					86.0522	0.171394	0.362592	0.220803	0.638429	NA		77.9123	-0.256885	0.42632	0.357573	0.549857	1
ENSMUSG00000004056	Akt2	618.347	1.50146	0.514782	6.89251	0.00865577	0.118934		865.446	0.452466	0.273313	2.77211	0.0959194	0.304559		631.055	0.643562	0.305938	3.9258	0.0475506	0.391093		ENSMUSG00000004056			840.386	-0.224826	0.181385	1.56023	0.211631	0.654801		890.583	0.0831515	0.228137	0.133618	0.71471	1
ENSMUSG00000004069	Dnaja3	37.7648	0.59246	1.02763	0.348615	0.554898	0.844994		38.3002	0.113892	0.556408	0.0411334	0.839281	0.93066		38.1873	0.355177	0.609331	0.37165	0.542106	0.906392					27.3654	-0.62008	0.49819	1.5865	0.207827	NA		49.3382	0.019093	0.424212	0.00203585	0.964011	1
ENSMUSG00000004071	Cdip1	59.8336	0.523785	0.914498	0.366861	0.54472	0.840129		60.2069	-0.215897	0.436634	0.240884	0.623568	0.819652		70.6651	0.263871	0.56167	0.220612	0.638574	0.930622					46.6496	-0.00715351	0.335005	0.000449325	0.983088	NA		77.0095	-0.370418	0.401292	0.832911	0.361432	1
ENSMUSG00000004085	Map3k20	79.7502	1.40195	0.672726	3.6829	0.0549732	0.324076		102.712	0.890383	0.329941	7.4183	0.00645637	0.0565561		57.5981	-0.171797	0.572869	0.0825367	0.773889	0.966373					111.941	-0.176321	0.324781	0.294126	0.587589	NA		70.1634	0.211559	0.474015	0.20271	0.652542	1
ENSMUSG00000004096	Cwc15	526.01	-0.956691	0.426817	5.49765	0.019042	0.189919		559.419	0.0888734	0.282045	0.100414	0.751334	0.887318		672.965	-0.371049	0.342615	1.26929	0.259899	0.740375					476.039	-0.00762158	0.184603	0.0017185	0.966933	0.992231		712.911	-0.015733	0.27214	0.00333941	0.953918	1
ENSMUSG00000004098	Col5a3	0.929353	2.2606	5.75706	0.000842333	0.976846	NA		3.4557	-0.864723	1.4795	0.337333	0.561373	0.778658		3.35784	3.72633	2.25266	2.00142	0.157152	NA					2.01114	-0.637725	1.14127	0.292137	0.588854	NA		3.17557	-1.27735	1.538	0.642943	0.422647	1
ENSMUSG00000004099	Dnmt1	550.765	1.68155	0.63785	5.91964	0.014973	0.165257		994.941	1.78298	0.304985	33.8317	6.00906e-09	6.85308e-07		413.022	0.292409	0.318354	0.798961	0.371404	0.819696	B				942.864	-0.781768	0.239774	10.7947	0.00101792	0.0939966		632.169	0.473938	0.272802	3.11343	0.0776492	1
ENSMUSG00000004100	Ppan	34.1231	0.0403046	0.912606	0.00207445	0.963672	0.991694		31.0193	-0.236577	0.552142	0.172442	0.67795	0.848903		34.269	0.025158	0.658678	0.00171506	0.966966	0.996885					29.4786	0.13856	0.500791	0.0628339	0.802072	NA		51.8707	0.521908	0.441068	1.44966	0.228582	1
ENSMUSG00000004105	Angptl2	3.52347	0.861528	3.12079	0.0367705	0.847933	NA		3.13335	0.410511	1.2862	0.102755	0.748548	NA		2.80684	-0.972479	2.04065	0.174629	0.676031	NA					2.94089	-0.60733	1.14426	0.22109	0.638211	NA		4.8825	1.24078	1.40042	0.81983	0.36523	1
ENSMUSG00000004110	Cacna1e	13.7511	-0.169931	1.53648	0.0123039	0.911677	0.9778		12.377	0.270303	0.718077	0.130843	0.71756	0.870489		15.7406	-0.231078	0.792188	0.102377	0.748995	0.958134					10.39	-0.193547	0.471611	0.160732	0.688484	NA		14.2089	-0.0345978	0.833075	0.00173299	0.966794	1
ENSMUSG00000004127	Trmt10a	16.0385	2.67011	2.00757	0.828389	0.362739	0.729714		20.0423	0.438574	0.613515	0.50885	0.475637	0.720979		18.515	1.11829	1.24726	0.479785	0.48852	0.882961					19.396	0.0843404	0.427334	0.0393292	0.842798	NA		25.1243	0.403402	0.705073	0.328362	0.566625	1
ENSMUSG00000004187	Kifc2	2.47696	-5.55159	4.85925	1.75489	0.185263	NA		2.35036	-1.05063	1.50802	0.520032	0.470828	NA		4.2059	-0.678511	1.59094	0.0966752	0.755857	0.960629					1.42871	-0.26369	1.53835	0.00129192	0.971328	NA		5.0794	-0.266063	1.21643	0.0458196	0.830504	1
ENSMUSG00000004207	Psap	3318.35	1.34091	0.47439	6.74507	0.0094007	0.124822		3541.76	-0.238578	0.285931	0.690577	0.405968	0.666975		3517.59	0.907056	0.377704	5.53338	0.018657	0.251432					3208.45	0.141614	0.240219	0.344742	0.557105	0.878257		4905.45	-0.441702	0.295388	2.15413	0.142187	1
ENSMUSG00000004221	Ikbkg	327.3	0.625362	0.474573	1.6676	0.19658	0.573578		579.012	0.258858	0.309539	0.714766	0.397866	0.660547		398.042	0.294743	0.352319	0.623737	0.429662	0.850805					523.381	-0.371514	0.254781	2.15156	0.142425	0.58032		512.011	0.287739	0.290639	0.998577	0.317655	1
ENSMUSG00000004233	Wars2	17.4705	-0.935494	1.599	0.367737	0.54424	0.839834		13.1882	0.435239	0.644564	0.462915	0.496265	0.733748		15.8006	-1.34496	0.823115	3.03954	0.0812588	0.494271					9.86332	-0.812096	0.489237	2.82687	0.0926988	NA		18.1537	0.58336	0.596366	0.980035	0.32219	1
ENSMUSG00000004263	Atn1	31.0067	0.847724	1.17067	0.546809	0.459625	0.791766		30.0565	-0.59061	0.476907	1.47475	0.224597	0.493053		42.105	0.897163	0.627049	2.05528	0.15168	0.624653					18.0938	0.271327	0.415001	0.422541	0.515672	NA		44.2092	-0.30395	0.592956	0.258464	0.611177	1
ENSMUSG00000004264	Phb2	468.642	0.58956	0.414079	2.01837	0.155406	0.525424		487.177	-0.0596308	0.280263	0.044819	0.832337	0.927069		562.008	0.397308	0.329061	1.47717	0.224217	0.713503					412.852	0.0949766	0.244305	0.149644	0.698875	0.926425		732.435	-0.130743	0.28296	0.21163	0.645493	1
ENSMUSG00000004266	Ptpn6	575.797	0.904053	0.481137	3.29309	0.0695718	0.367672		664.142	0.0862458	0.243846	0.125546	0.723095	0.873013		722.212	0.580261	0.34931	2.4884	0.114688	0.567318					613.334	0.299616	0.222908	1.73972	0.187175	0.63696		898.53	-0.313773	0.279749	1.22868	0.267664	1
ENSMUSG00000004268	Emg1	40.9334	0.981212	0.836032	1.35573	0.244279	0.622899		56.3916	0.260946	0.443412	0.339222	0.560279	0.777739		47.2164	0.772294	0.609501	1.66412	0.197048	0.684199					54.2183	0.00726392	0.32791	0.000496989	0.982214	NA		78.9051	0.570604	0.461018	1.58852	0.207538	1
ENSMUSG00000004270	Lpcat3	34.1544	2.59206	1.46496	1.62895	0.201849	0.579575		61.2758	0.388723	0.70047	0.301715	0.582809	0.792544		43.8815	1.954	1.14349	2.12782	0.144646	0.617849					57.2112	-0.616522	0.360823	2.81556	0.0933546	NA		45.6157	-1.36809	0.872978	2.18556	0.13931	1
ENSMUSG00000004285	Atp6v1f	7849.05	0.452105	0.412141	1.07329	0.300205	0.673746		11113	0.183506	0.312583	0.351306	0.553375	0.773509		8531.5	-0.0909672	0.457579	0.0347571	0.852106	0.975733					10479.4	-0.180687	0.207542	0.756906	0.384299	0.788707		10529.9	0.522525	0.375017	1.99812	0.157494	1
ENSMUSG00000004317	Clcn5	68.4291	-0.00136644	0.721185	3.44086e-06	0.99852	1		47.8036	0.57979	0.411249	1.97727	0.159679	0.408733		62.6894	-0.648819	0.468231	2.07019	0.150202	0.623247					49.7009	0.375846	0.35561	1.10998	0.292087	NA		65.7418	-0.322913	0.408802	0.614642	0.433045	1
ENSMUSG00000004319	Clcn3	1776.37	-0.636667	0.474914	1.66902	0.19639	0.573412		2032.48	-0.355145	0.232161	2.34174	0.125949	0.357679		2707.92	-0.0834343	0.400274	0.0383453	0.844751	0.974417					1756.58	0.0214855	0.232906	0.00812748	0.928166	0.983672		2855.46	-0.0585967	0.315977	0.0341042	0.853485	1
ENSMUSG00000004347	Pde1c	6.39591	3.73357	2.16636	2.02449	0.15478	NA		7.51006	-0.170376	0.860632	0.0394765	0.842508	0.932658		8.10549	2.11304	1.11266	2.75238	0.09711	0.527852					5.6928	-0.211273	0.625886	0.114075	0.735552	NA		11.1725	0.571892	0.700075	0.674506	0.411485	1
ENSMUSG00000004356	Utp20	32.5941	-1.10462	1.06302	1.30775	0.252803	0.630281		31.8062	-0.590648	0.506296	1.35654	0.244138	0.515065		43.531	-0.0645714	0.621491	0.012478	0.911057	0.988827					23.7671	5.6588e-05	0.453844	-1.098e-07	1	NA		53.1937	-0.101055	0.420284	0.0579017	0.809844	1
ENSMUSG00000004359	Spic	8.69568	0.86581	2.72611	0.0338442	0.854039	0.962897		11.743	0.294133	0.849456	0.115528	0.733937	0.878085		9.95605	1.80321	1.4539	1.26107	0.261448	0.742457					12.2101	0.194214	0.591266	0.104837	0.7461	NA		14.7058	0.56377	0.77579	0.545307	0.460242	1
ENSMUSG00000004364	Cul3	306.405	0.118452	0.443931	0.0720848	0.788325	0.940163		332.931	0.163068	0.248831	0.423744	0.515075	0.747666		355.894	-0.0281985	0.299619	0.00929725	0.923185	0.991249					297.507	-0.0920824	0.163867	0.318969	0.572228	0.886436		372.533	-0.366905	0.232798	2.42226	0.119622	1
ENSMUSG00000004383	Large1	9.42833	-0.668423	1.75585	0.178072	0.673035	0.893184		3.3483	-1.39522	1.49398	0.743351	0.38859	NA		10.2558	-0.834641	1.324	0.506233	0.476774	0.875026					1.97483	1.01033	1.27582	0.537758	0.463363	NA		6.94275	0.400878	1.47479	0.0718368	0.788681	1
ENSMUSG00000004393	Ddx56	59.126	2.13243	1.04072	2.71454	0.0994374	0.431101		64.8849	-0.218168	0.363639	0.360341	0.548317	0.770372		68.9736	1.08014	0.57066	2.7365	0.0980793	0.529824				DDX56	55.2773	-0.0776982	0.304809	0.0635421	0.800983	NA		103.34	-0.144496	0.334984	0.185376	0.666793	1
ENSMUSG00000004394	Tmed4	53.383	-0.712921	1.04109	0.503042	0.478166	0.801919		55.7202	-0.389453	0.482673	0.643083	0.422597	0.680207		69.23	-0.0362249	0.57195	0.00445964	0.946756	0.994946					52.8081	0.394815	0.313011	1.57942	0.208845	NA		88.2996	0.124977	0.416771	0.0907893	0.763176	1
ENSMUSG00000004446	Bid	315.673	-1.08734	0.481589	5.82225	0.0158247	0.170036		371.483	-0.14258	0.282207	0.25575	0.613055	0.814261		445.201	-0.421681	0.350629	1.48035	0.22372	0.713503		ENSMUSG00000004446			308.548	-0.0645189	0.188532	0.11744	0.731827	0.938213		404.738	-0.288468	0.276205	1.06506	0.302064	1
ENSMUSG00000004451	Ralb	104.379	-0.091497	0.586319	0.0240095	0.876861	0.968414		114.897	0.35267	0.279766	1.57936	0.208854	0.472349		142.776	0.0277072	0.411215	0.00441155	0.947044	0.994946					104.092	0.139516	0.26194	0.283743	0.594258	NA		139.833	0.0558084	0.336762	0.0276263	0.86799	1
ENSMUSG00000004455	Ppp1cc	56.0716	-1.18866	0.841864	2.25739	0.132978	0.489823		40.1189	-0.320039	0.332691	0.919371	0.33764	0.607339		64.3243	-0.827721	0.473764	3.50877	0.0610448	0.438103					30.9126	-0.0509611	0.319231	0.0251308	0.874041	NA		50.5601	-0.65136	0.42042	2.31124	0.128441	1
ENSMUSG00000004460	Dnajb11	199.007	-0.591356	0.622618	0.878652	0.348571	0.716555		174.995	-0.277083	0.31059	0.791736	0.373576	0.6398		223.264	-0.411353	0.444016	0.930571	0.334715	0.794394					159.524	0.215794	0.209504	1.06405	0.302293	0.737201		239.244	-0.0870926	0.301293	0.083305	0.772868	1
ENSMUSG00000004462	Tbccd1	121.834	2.65236	0.898781	5.43859	0.0196965	0.192849		234.354	1.3197	0.321848	16.8851	3.97116e-05	0.00122723		73.5457	1.00739	0.53944	3.09638	0.0784664	0.486161	B				232.649	-0.490307	0.24144	4.17208	0.0410953	0.378632		94.0428	-0.0430184	0.341844	0.0158287	0.899881	1
ENSMUSG00000004473	Clec11a	1.71044	4.82633	5.79213	0.449609	0.502521	NA		1.10597	-2.37966	2.37867	0.983332	0.321378	NA		1.19075	3.49844	3.59307	0.960043	0.327176	NA					0.88678	0.605752	2.20532	0.0960523	0.756619	NA		3.95044	1.99047	1.37233	2.2638	0.132429	1
ENSMUSG00000004500	Zfp324	9.7569	0.44777	1.86249	0.0690367	0.792745	0.942164		6.72659	-0.345021	0.823154	0.173084	0.677386	0.848706		9.98333	0.129101	0.794041	0.0286111	0.86568	0.979454					7.1088	1.07938	0.708657	2.20587	0.137486	NA		11.9739	-0.721863	0.85612	0.679111	0.409893	1
ENSMUSG00000004508	Gab2	193.306	-1.37608	0.530688	7.78055	0.00528117	0.0918976		252.066	-0.0122638	0.351606	0.00123163	0.972004	0.991029		301.941	-0.20389	0.447619	0.222271	0.637315	0.93045					222.475	0.155914	0.243992	0.402479	0.525812	0.86125		339.966	0.069262	0.347874	0.0398803	0.841715	1
ENSMUSG00000004530	Coro1c	322.94	-0.693626	0.451519	2.52902	0.11177	0.454852		320.855	-0.239991	0.296468	0.661423	0.416058	0.675408		434.855	-0.355433	0.341816	1.06311	0.302508	0.773977					270.927	0.158149	0.222917	0.500081	0.479464	0.838351		497.093	-0.2165	0.273532	0.617073	0.432137	1
ENSMUSG00000004535	Tax1bp1	7745.24	0.396186	0.388464	0.955607	0.328296	0.700407		13616.7	0.758849	0.310905	6.15072	0.0131359	0.0912539		9565.59	0.0417987	0.416563	0.00865775	0.925866	0.991872					14754.6	-0.0660795	0.274851	0.058579	0.808756	0.949673		11175.6	0.230992	0.355834	0.42877	0.512593	1
ENSMUSG00000004552	Ctse	3085.95	1.89369	0.404974	17.8733	2.3611e-05	0.00246786		5981.49	2.13933	0.311664	46.4074	9.60543e-12	1.85154e-09		2072.8	0.156211	0.410676	0.130113	0.718315	0.95185	C				7621.97	-0.144408	0.320692	0.202003	0.653109	0.914663		2825.95	0.197585	0.412634	0.232746	0.629495	1
ENSMUSG00000004558	Ndrg2	99.7797	-0.302423	0.818776	0.163055	0.686359	0.899238		133.226	-0.00943083	0.33204	0.000815763	0.977214	0.993636		113.596	-0.317868	0.372462	0.756922	0.384293	0.830259					114.932	-0.299306	0.263208	1.30827	0.252708	0.694034		140.912	0.513038	0.292925	3.15023	0.0759164	1
ENSMUSG00000004561	Mettl17	45.3188	-2.27192	0.912551	7.01152	0.00809867	0.115027		34.568	-0.338218	0.700071	0.222647	0.63703	0.82661		50.8032	-1.17636	0.712191	3.33523	0.0678107	0.455185					23.9992	-0.494165	0.513199	0.905646	0.341272	NA		43.1198	-0.35041	0.548525	0.397594	0.528334	1
ENSMUSG00000004562	Arhgef40	6.13575	-4.44702	3.17163	2.33887	0.126181	NA		3.46141	-0.80338	1.3026	0.382104	0.536479	0.762709		5.7292	-2.1625	1.47842	2.32332	0.127448	0.594714					2.79982	-0.238391	1.02502	0.0532417	0.817515	NA		2.71286	-0.649065	1.37196	0.209798	0.646926	1
ENSMUSG00000004565	Pnpla6	20.5153	2.28257	1.15969	3.3208	0.0684086	0.363686		23.7822	1.07676	0.510635	4.42333	0.0354507	0.170289		19.243	0.808506	0.732981	1.02566	0.311181	0.779226					26.2963	0.18826	0.301438	0.39242	0.53103	NA		19.9267	-0.898165	0.695606	1.56153	0.211442	1
ENSMUSG00000004567	Mcoln1	48.8649	3.56852	0.954401	9.98136	0.00158133	0.0443893		110.054	2.91975	0.31358	84.4636	3.91353e-20	2.08736e-17		24.752	0.499143	0.584404	0.648669	0.420589	0.847133	C				130.999	-0.310907	0.244039	1.66288	0.197215	0.645553		22.9379	0.436915	0.594428	0.556746	0.455574	1
ENSMUSG00000004568	Arhgef18	165.325	-0.0806321	0.632895	0.0173549	0.895191	0.974747		214.618	-0.177615	0.321443	0.304713	0.580943	0.791426		261.178	0.476823	0.416946	1.29724	0.254719	0.735609					172.033	0.126734	0.222247	0.325923	0.56807	0.884895		333.792	-0.443615	0.309364	1.9919	0.158142	1
ENSMUSG00000004591	Pkn2	1742.96	0.413539	0.754263	0.209672	0.647025	0.883631		2396.9	0.2249	0.25499	0.792039	0.373484	0.63977		2297.24	0.156984	0.529117	0.0684557	0.793599	0.969495					2115.13	-0.171167	0.228188	0.561933	0.453482	0.827516		2846.94	0.627321	0.312108	4.18826	0.0407048	1
ENSMUSG00000004609	Cd33	166.181	-2.05473	0.572564	15.0671	0.000103759	0.00708863		207.499	0.798743	0.392902	4.21697	0.0400215	0.18402		200.685	-1.21782	0.494176	7.11009	0.00766513	0.162346	A				382.732	1.02348	0.344508	8.21623	0.00415174	0.177921		188.405	-0.173696	0.446533	0.149362	0.699145	1
ENSMUSG00000004610	Etfb	166.5	0.0802174	0.584512	0.0168867	0.896607	0.975152		203.368	-0.434177	0.321954	1.78995	0.180932	0.437668		253.436	0.698854	0.447748	2.44263	0.118078	0.575565					153.053	0.149464	0.213776	0.491627	0.483202	0.840833		326.173	0.139218	0.340878	0.168401	0.681537	1
ENSMUSG00000004612	Nkg7	890.317	-1.13113	0.404112	8.85695	0.00291974	0.0649192		687.94	-0.487484	0.206355	5.51118	0.0188953	0.114525		991.447	-0.78985	0.307818	7.47626	0.00625179	0.148585					533.178	-0.0997837	0.221137	0.203054	0.652267	0.914157		1086.04	-0.180177	0.224256	0.636567	0.424957	1
ENSMUSG00000004626	Stxbp2	485.154	-0.199128	0.470642	0.192888	0.660524	0.889099		469.506	-0.511047	0.228199	4.94207	0.0262107	0.140446		661.469	0.0611587	0.347396	0.0315944	0.858921	0.97872					376.431	0.256687	0.184403	1.89471	0.168672	0.615376		713.217	-0.277387	0.239852	1.30944	0.252495	1
ENSMUSG00000004631	Sgce	62.9966	-2.96972	0.834406	15.599	7.82968e-05	0.00587418		82.0333	-2.00369	0.357876	29.4917	5.61565e-08	4.81375e-06		142.75	-0.205977	0.394649	0.260109	0.610046	0.923423	C				41.0457	-0.0451418	0.399503	0.012735	0.91015	NA		149.268	0.0952368	0.370857	0.0657184	0.797676	1
ENSMUSG00000004633	Chn2	30.1029	-3.65188	1.10761	11.7468	0.000609475	0.0245173		16.0416	-0.631881	0.580795	1.21518	0.270308	0.542915		37.7761	-1.39618	0.562771	7.51084	0.00613286	0.147752	A				13.5061	0.897088	0.462866	3.56763	0.0589163	NA		27.7854	-0.741474	0.424444	2.97153	0.0847418	1
ENSMUSG00000004637	Wwox	17.0092	-2.1661	1.66435	1.90821	0.167162	0.540826		11.8916	-1.21487	0.572421	4.26775	0.0388422	0.181025		23.5886	-0.761258	0.677008	1.49582	0.221315	0.712476					10.8311	0.889848	0.441912	3.88928	0.0485954	NA		19.1513	-0.468181	0.556544	0.691854	0.405534	1
ENSMUSG00000004642	Slbp	53.8883	1.12378	0.880728	1.3082	0.25272	0.630281		39.9678	0.851942	0.414049	4.11691	0.0424565	0.190471		47.3113	-0.597788	0.524451	1.13796	0.286083	0.762129					41.9434	-0.0693792	0.352929	0.037692	0.846063	NA		34.2749	0.163476	0.371275	0.194943	0.658834	1
ENSMUSG00000004655	Aqp1	965.59	1.41019	0.623137	3.83859	0.0500856	0.310366		1367.42	0.241387	0.424858	0.331103	0.565011	0.780481		1168.01	0.623639	0.678998	0.595184	0.440422	0.856663					1372.12	-0.181824	0.287486	0.385936	0.534443	0.868162		1333.74	-0.230212	0.497883	0.208476	0.647964	1
ENSMUSG00000004661	Arid3b	96.3387	0.368761	0.664963	0.297026	0.585753	0.857662		82.3564	0.0645922	0.265384	0.0587444	0.808492	0.916923		106.289	-0.255895	0.410093	0.368226	0.543973	0.906553					68.9722	-0.126334	0.198552	0.393213	0.530615	NA		116.956	0.142411	0.368632	0.150338	0.698212	1
ENSMUSG00000004665	Cnn2	4307.56	0.64038	0.517138	1.2914	0.25579	0.632826		4099.28	-0.131392	0.297274	0.198083	0.656273	0.837165		5465.86	0.155896	0.498412	0.0774661	0.780761	0.968383					3789.17	0.177352	0.253136	0.479722	0.488548	0.842937		6421.89	0.137217	0.361847	0.144622	0.703729	1
ENSMUSG00000004667	Polr2e	270.18	0.128593	0.507611	0.0668897	0.79592	0.943024		275.617	-0.442623	0.292249	2.27028	0.131876	0.368266		361.678	0.215359	0.401961	0.284924	0.593492	0.920648					207.808	-0.098728	0.223103	0.193029	0.660408	0.915094		423.868	0.0423301	0.277505	0.0233499	0.878551	1
ENSMUSG00000004668	Abca13	3.3372	0.93049	3.46455	0.0726048	0.787581	NA		3.49929	1.48894	0.977924	2.28975	0.130231	0.365373		3.40079	-0.431205	1.61815	0.0563034	0.812437	NA					6.34247	0.694702	0.760505	0.751399	0.386034	NA		2.8549	0.496283	1.22248	0.161033	0.688207	1
ENSMUSG00000004677	Myo9b	99.3282	-0.565679	0.604048	0.954411	0.328599	0.70061		97.6914	0.238179	0.28681	0.706747	0.400526	0.662677		115.111	-0.621496	0.371923	2.85292	0.0912084	0.516242					100.236	0.247337	0.249463	0.967542	0.325294	NA		130.916	-0.0652911	0.362404	0.0324111	0.857128	1
ENSMUSG00000004698	Hdac9	70.3659	-1.42023	0.851119	3.42374	0.0642654	0.352897		60.8783	-1.06931	0.465487	4.84622	0.0277068	0.145516		104.308	-0.386979	0.502746	0.663339	0.415384	0.844613					33.3766	-0.204993	0.398322	0.263139	0.607972	NA		86.291	-0.890347	0.391933	4.85741	0.0275277	1
ENSMUSG00000004707	Ly9	111.398	-1.49834	0.677469	5.77988	0.0162107	0.172383		141.026	-0.850602	0.432028	3.75487	0.052654	0.215695		215.389	0.582458	0.558654	1.18003	0.277349	0.754862					75.0039	0.120588	0.323717	0.133012	0.715329	NA		210.561	-0.601166	0.420648	1.94665	0.162948	1
ENSMUSG00000004709	Cd244a	119.294	-0.585816	0.603597	1.0307	0.309994	0.68244		79.5637	1.00256	0.411154	5.72997	0.0166778	0.106408		109.658	-1.32067	0.525567	7.40913	0.00648936	0.151142					102.474	0.531959	0.297457	2.89612	0.0887933	NA		83.7541	0.0345406	0.438252	0.00624781	0.936998	1
ENSMUSG00000004730	Adgre1	169.263	-0.430745	0.70869	0.355516	0.551007	0.843224		128.782	0.244992	0.300671	0.670661	0.412821	0.672896		159.06	-0.660881	0.422378	2.67632	0.101851	0.537161				ADGRE1	137.43	0.39823	0.308926	1.62198	0.202816	0.648186		168.062	-0.161887	0.290652	0.307187	0.579412	1
ENSMUSG00000004748	Mtfp1	5.52363	6.45265	3.9094	1.55024	0.2131	NA		12.1871	-1.27164	0.77306	2.46289	0.116564	0.34244		16.5837	7.63565	1.60831	21.2742	3.98062e-06	0.00141472	F				5.77787	0.793052	0.730677	1.04169	0.307429	NA		17.4502	-1.73315	0.981935	2.71643	0.09932	1
ENSMUSG00000004768	Rab23	9.30555	-0.68299	1.61456	0.18184	0.669796	0.892562		6.69947	0.153711	0.78146	0.0385087	0.844425	0.933233		10.4523	-0.733225	0.876324	0.746787	0.387495	0.832699					5.57511	-0.0532349	0.67112	0.00634221	0.936525	NA		11.3661	0.75516	0.752924	1.04225	0.307299	1
ENSMUSG00000004771	Rab11a	1287.83	0.207058	0.383569	0.277919	0.598068	0.863044		2048.74	0.379556	0.282613	1.8392	0.175045	0.429807		1560.49	-0.118099	0.403272	0.0749713	0.784231	0.969278					1895.44	-0.328447	0.174402	3.62554	0.0568993	0.417584		1663.13	0.0358725	0.304593	0.0138532	0.906306	1
ENSMUSG00000004788	Eif2b2	179.554	0.736824	0.578152	1.42303	0.232905	0.61288		144.222	0.155248	0.334136	0.213534	0.644011	0.829776		179.377	-0.0247129	0.385374	0.00388109	0.950325	0.995606					125.066	0.109375	0.281677	0.148636	0.699842	0.926425		199.497	-0.442865	0.353893	1.51749	0.218	1
ENSMUSG00000004789	Dlst	184.992	0.540386	0.515253	1.03275	0.309513	0.682103		235.165	0.438316	0.231276	3.63142	0.0566985	0.225869		208.882	0.1042	0.319464	0.101973	0.749475	0.958379					219.054	-0.17669	0.18327	0.929648	0.334954	0.762628		247.785	0.0931485	0.249612	0.140254	0.708029	1
ENSMUSG00000004798	Ulk2	177.422	-0.177001	0.594007	0.0972131	0.7552	0.92534		177.446	-0.269248	0.251206	1.14479	0.284642	0.559035		210.856	-0.0734781	0.353377	0.0460583	0.83007	0.973226		ENSMUSG00000004798			162.429	0.222111	0.172417	1.66096	0.197473	0.645553		231.202	-0.190108	0.241591	0.611197	0.434337	1
ENSMUSG00000004837	Grap	97.5356	-0.507401	0.825825	0.453474	0.50069	0.814112		77.993	-1.66706	0.351047	20.9898	4.61731e-06	0.000212214		131.432	0.122595	0.46045	0.0774063	0.780844	0.968383	B				52.7772	0.690046	0.279421	5.71605	0.0168105	NA		145.761	-0.553178	0.286154	3.59219	0.0580516	1
ENSMUSG00000004843	Chmp2b	196.677	0.305268	0.573252	0.283498	0.594418	0.861272		193.398	-0.0800621	0.26778	0.0890744	0.765357	0.894636		235.098	0.241223	0.370691	0.44881	0.5029	0.890525					166.147	0.154175	0.234592	0.435591	0.509258	0.850387		261.265	0.018675	0.297975	0.00394707	0.949905	1
ENSMUSG00000004846	Plod3	172.829	0.709069	0.561996	1.53168	0.215861	0.597268		177.195	0.644807	0.385549	2.79137	0.0947731	0.302676		143.618	-0.087023	0.455885	0.0375467	0.846356	0.974417					199.371	0.243017	0.279967	0.750702	0.386254	0.789935		189.75	-0.133323	0.41211	0.103967	0.74712	1
ENSMUSG00000004849	Ap1s1	175.558	0.274474	0.501884	0.287929	0.591551	0.860057		204.89	0.110451	0.252608	0.191407	0.661748	0.840225		222.157	0.156699	0.360813	0.18386	0.668077	0.936695					173.067	-0.121797	0.236347	0.270575	0.602946	0.900028		274.613	0.242088	0.317555	0.590115	0.442375	1
ENSMUSG00000004864	Mapk13	26.623	4.70827	1.4405	6.38244	0.0115255	0.140383		37.1151	1.4694	0.623812	5.51853	0.018816	0.114333		20.5138	2.16273	0.809627	5.38609	0.0202979	0.262252					55.8196	0.831817	0.445638	3.18815	0.074174	NA		34.7567	1.25424	0.631456	4.17997	0.0409045	1
ENSMUSG00000004865	Srpk1	236.438	0.146235	0.531981	0.0683618	0.793737	0.942259		227.246	-0.0393887	0.259435	0.0228934	0.879735	0.949716		275.026	-0.0166468	0.345071	0.00231609	0.961616	0.996196					188.437	-0.0992349	0.196945	0.250418	0.616781	0.902573		313.256	-0.255933	0.240614	1.11269	0.291499	1
ENSMUSG00000004880	Lbr	87.477	1.82572	0.866373	3.10396	0.0781021	0.385903		87.9407	2.02087	0.481713	17.0771	3.58933e-05	0.00112126		54.3488	-0.864793	0.737596	1.15367	0.282783	0.759715	B				102.22	-0.236483	0.409812	0.335867	0.562225	NA		62.9494	0.373021	0.581154	0.416343	0.518768	1
ENSMUSG00000004885	Crabp2	0.187002	1.64152	5.90235	0.117964	0.731254	NA		17.1951	2.42975	2.39992	0.894086	0.344372	0.612382		6.07199	5.83217	2.39059	5.12039	0.0236462	0.279517					9.05578	-2.30622	1.54822	1.12621	0.288586	NA		12.4079	1.63037	2.55562	0.432322	0.510852	1
ENSMUSG00000004895	Prcc	7.27268	3.41282	2.32705	1.13036	0.287699	0.664054		9.35631	0.300354	0.773283	0.150806	0.697766	0.859804		7.35367	1.97006	1.30017	1.9171	0.166177	0.647735					13.2532	0.78507	0.589082	1.66811	0.196512	NA		10.1003	0.788365	0.795745	1.02746	0.310756	1
ENSMUSG00000004896	Rrnad1	20.6954	0.17362	1.12265	0.0233944	0.878436	0.969005		20.8386	0.431442	0.594798	0.519635	0.470997	0.717851		17.3972	-0.748176	0.726727	1.11486	0.291029	0.764371					19.2716	-0.235055	0.430162	0.290328	0.59001	NA		14.8176	-0.920568	0.662576	1.8554	0.173156	1
ENSMUSG00000004897	Hdgf	2245.44	0.904968	0.613575	1.99212	0.158119	0.528317		2505.59	0.45404	0.255133	3.19687	0.0737792	0.262344		1773.94	0.214859	0.318248	0.455564	0.499705	0.888777					2391.15	-0.212481	0.211619	1.01924	0.3127	0.747878		1975.55	-0.190946	0.23022	0.677652	0.410396	1
ENSMUSG00000004929	Thop1	7.34227	0.56923	2.3001	0.0509389	0.821437	0.952788		7.93795	1.0178	0.903707	0.794855	0.372636	0.639077		8.7462	0.210058	1.18687	0.0310285	0.860177	0.97872					6.02062	-0.440101	0.899665	0.176132	0.674719	NA		9.59958	0.734445	1.03121	0.519868	0.470898	1
ENSMUSG00000004931	Apba3	8.75459	0.536905	2.13388	0.0785794	0.779232	0.935338		4.51772	0.946026	0.985502	0.94377	0.33131	0.601133		4.5338	-0.813907	1.46855	0.365414	0.545515	0.906742					6.0419	0.603783	0.679386	0.706877	0.400482	NA		6.49863	0.276907	1.05368	0.0706576	0.790382	1
ENSMUSG00000004933	Matk	50.8509	-1.79866	0.964156	3.33384	0.0678681	0.362642		36.2469	0.0539555	0.496998	0.0116265	0.914134	0.966362		56.9643	-1.28892	0.60172	4.84333	0.0277532	0.302984					35.9903	0.216731	0.384004	0.298147	0.585046	NA		61.5795	1.36127	0.498617	7.93906	0.00483791	1
ENSMUSG00000004934	Pias4	47.526	1.03652	0.805689	1.61842	0.203312	0.581604		73.1181	0.668389	0.384927	2.96941	0.0848529	0.28544		65.5641	0.823188	0.465628	2.89711	0.0887387	0.510713					59.3251	-0.328407	0.320285	1.00287	0.316616	NA		77.3136	-0.344032	0.421425	0.652288	0.419296	1
ENSMUSG00000004936	Map2k1	285.032	-0.130689	0.476687	0.0801665	0.777072	0.93428		308.387	-0.403499	0.245515	2.66601	0.102513	0.317822		395.164	0.345248	0.359457	0.962309	0.326606	0.78886		ENSMUSG00000004936			249.918	0.267371	0.178741	2.2279	0.135538	0.565356		423.931	-0.337067	0.274328	1.47392	0.224728	1
ENSMUSG00000004937	Sgta	282.264	1.19374	0.524178	4.8213	0.0281101	0.233502		405.886	0.640839	0.275628	5.44351	0.0196412	0.117366		333.286	0.734118	0.300648	5.73984	0.0165843	0.237243					392.406	-0.0688991	0.231624	0.0885277	0.766057	0.947044		447.578	0.234159	0.288502	0.669797	0.413122	1
ENSMUSG00000004945	Tmem242	310.722	0.17565	0.434295	0.165499	0.684143	0.897681		363.314	-1.08196	0.262082	16.5509	4.73611e-05	0.0014239		479.475	0.591191	0.346365	2.69433	0.100706	0.534783	B				290.978	0.45604	0.159859	7.86709	0.00503427	0.189531		586.646	0.216712	0.265613	0.673815	0.411725	1
ENSMUSG00000004947	Dtx2	83.7189	0.814514	0.804597	1.03768	0.308361	0.680677		71.2312	-0.0744587	0.370774	0.0399376	0.841603	0.932036		71.7751	0.29704	0.558185	0.321861	0.570492	0.915295					57.4219	-0.188144	0.300206	0.389974	0.532313	NA		90.6441	-0.656516	0.401717	2.563	0.109391	1
ENSMUSG00000004951	Hspb1	10.9614	3.2874	2.0913	1.97723	0.159683	0.529577		26.1119	-0.256418	1.41311	0.0291739	0.864378	0.942096		19.4052	4.83036	1.54661	9.09627	0.00256131	0.0913189					23.4364	-0.390614	1.0257	0.125763	0.722866	NA		24.711	0.322428	1.08017	0.0913784	0.762432	1
ENSMUSG00000004952	Rasa4	29.9079	2.24261	1.64849	0.962573	0.326539	0.698121		21.837	0.549779	0.773685	0.489207	0.484281	0.725037		20.5403	0.576592	1.04601	0.2623	0.608544	0.923423					21.7342	0.229948	0.552702	0.156745	0.692171	NA		25.8271	-0.777516	0.704474	1.16088	0.281284	1
ENSMUSG00000004961	Syt5	22.8869	3.89146	1.78784	2.38747	0.122311	0.474103		20.6983	-2.27614	0.610287	13.1582	0.00028627	0.00599211		30.623	1.5879	1.10876	1.04229	0.30729	0.775577	B				7.45696	-1.31966	0.684904	3.78095	0.0518394	NA		32.1391	-0.228959	0.856496	0.068904	0.792939	1
ENSMUSG00000004980	Hnrnpa2b1	646.628	-0.5831	0.461775	1.74079	0.187039	0.563599		583.107	0.0323251	0.180551	0.0316632	0.858769	0.939088		742.639	-0.37519	0.320495	1.55004	0.21313	0.701802					569.787	0.333442	0.174898	3.55624	0.0593219	0.423061		712.837	-0.313962	0.206312	2.26202	0.132581	1
ENSMUSG00000004994	Ccdc130	35.5532	-0.906851	1.25508	0.618969	0.431431	0.776482		32.0331	-0.141212	0.424587	0.110767	0.739272	0.880629		41.8933	-0.387694	0.685509	0.36972	0.543157	0.906553					30.7036	0.383465	0.274931	1.93111	0.164638	NA		42.6398	-0.050329	0.438843	0.0131628	0.90866	1
ENSMUSG00000004996	Mri1	51.8028	-0.0802999	0.939237	0.00734004	0.931726	0.98393		54.6891	-1.26552	0.577265	4.56158	0.0326968	0.16248		80.8923	0.306189	0.540182	0.29207	0.588897	0.918889					30.7075	-0.137541	0.456953	0.0802955	0.776897	NA		100.582	-0.501731	0.407038	1.46958	0.225412	1
ENSMUSG00000005034	Prkacb	427.419	-0.52067	0.44198	1.45364	0.227945	0.609807		401.87	-0.106962	0.288162	0.137299	0.710981	0.86726		527.195	-0.425774	0.399462	1.15627	0.28224	0.75898					337.632	-0.0849844	0.219604	0.151188	0.697403	0.925807		561.785	-0.34353	0.322951	1.10086	0.294077	1
ENSMUSG00000005043	Sgsh	223.095	-0.0323554	0.660842	0.00271381	0.958454	0.990613		237.982	-0.373239	0.373983	0.984466	0.321099	0.592763		325.225	0.544413	0.480449	1.34502	0.24615	0.731047					157.459	0.143795	0.363486	0.156192	0.692687	0.925253		357.757	-0.436259	0.378486	1.2853	0.256916	1
ENSMUSG00000005054	Cstb	262.788	0.407908	0.474042	0.688659	0.406621	0.762151		277.243	0.475727	0.485002	0.94123	0.331962	0.601627		296.499	-0.00208488	0.461049	2.14287e-05	0.996307	0.999966					216.972	-0.478668	0.273433	3.11767	0.0774476	0.468061		342.386	0.750967	0.445363	2.98122	0.0842358	1
ENSMUSG00000005057	Sh2b2	15.4067	2.61952	1.7692	1.12545	0.288748	0.664614		19.0173	1.6067	0.597956	7.11765	0.00763286	0.0632092		9.59497	0.110154	1.1439	0.00635668	0.936453	0.993196					20.2039	-0.269393	0.458173	0.315069	0.574586	NA		16.7492	0.443404	0.671633	0.446522	0.503991	1
ENSMUSG00000005069	Pex5	27.3732	-2.207	0.963488	6.11874	0.0133756	0.154235		34.2271	-0.532432	0.35339	2.17308	0.140445	0.382551		44.5244	-0.0730546	0.62198	0.0167458	0.897037	0.985656					25.5704	-0.0407924	0.379724	0.0112253	0.915623	NA		42.6789	-0.210496	0.515223	0.164935	0.684653	1
ENSMUSG00000005078	Jkamp	86.1321	0.413533	0.815403	0.242791	0.622198	0.873024		84.2947	0.250205	0.318242	0.611053	0.434392	0.689627		89.1148	-0.201218	0.442423	0.202572	0.652652	0.933653					79.1133	0.00501429	0.265173	0.000331236	0.985479	NA		88.3065	-0.22479	0.31646	0.498362	0.480221	1
ENSMUSG00000005087	Cd44	2234.12	-1.67885	0.403988	20.1757	7.06457e-06	0.00093905		2645.45	-0.202878	0.315421	0.41608	0.5189	0.749918		3478.93	-0.50992	0.416333	1.52972	0.216155	0.705047	A				2299.62	0.1358	0.186691	0.522175	0.469916	0.833134		3355.17	-0.0535884	0.320564	0.0278304	0.867508	1
ENSMUSG00000005102	Eif2ak4	21.1371	0.776786	1.64009	0.265071	0.606657	0.866062		25.8471	-0.806197	0.654498	1.48008	0.223761	0.492113		35.4914	0.838041	0.713787	1.15217	0.283096	0.760078					17.4063	-0.0884783	0.513672	0.0292039	0.864309	NA		33.5008	-1.34239	0.581652	4.86661	0.0273812	1
ENSMUSG00000005103	Wdr1	729.475	-0.271557	0.385231	0.507253	0.47633	0.801354		723.74	0.14088	0.242324	0.342365	0.558467	0.776751		876.528	-0.353326	0.308094	1.26901	0.259952	0.740375					639.655	0.0832279	0.177917	0.216271	0.641896	0.911965		877.701	-0.159836	0.232732	0.465426	0.495099	1
ENSMUSG00000005107	Slc2a9	68.4439	-1.79676	0.819034	4.73824	0.0294992	0.238116		48.531	-1.37129	0.439174	9.35887	0.00221909	0.0271053		97.9631	-0.585532	0.437888	1.89783	0.168321	0.649588	B				31.5164	0.407916	0.413186	0.952658	0.329044	NA		111.911	0.403549	0.385808	1.12091	0.289723	1
ENSMUSG00000005125	Ndrg1	921.727	-1.3921	0.391377	14.048	0.000178208	0.010528		1415.2	-0.216815	0.288182	0.576959	0.447507	0.700799		1687.24	-0.00636894	0.331286	0.000358961	0.984884	0.998163	A				1111.96	-0.0285819	0.227616	0.0157308	0.900189	0.976079		1961.81	0.254457	0.289333	0.78661	0.375127	1
ENSMUSG00000005131	4930550C14Rik	20.0925	0.899212	2.34752	0.0655541	0.797924	0.943845		16.0228	-1.29313	0.680116	3.55601	0.0593301	0.231988		29.108	-0.138377	1.18712	0.00659356	0.935282	0.992883					10.3407	-0.226251	0.623983	0.12426	0.724459	NA		23.7725	0.500663	0.683935	0.538565	0.463028	1
ENSMUSG00000005142	Man2b1	686.712	-0.442148	0.590283	0.658724	0.417011	0.768855		606.255	0.00810145	0.229204	0.00125895	0.971696	0.99092		745.093	-0.5408	0.374976	2.22463	0.135825	0.605323				MAN2B1	502.245	-0.122194	0.199373	0.379211	0.538026	0.869772		677.948	-0.769801	0.298547	6.23714	0.0125099	1
ENSMUSG00000005148	Klf5	39.7021	-0.424524	1.05901	0.182558	0.669184	0.892513		65.1631	-0.0185093	0.495272	0.0013683	0.970493	0.990643		62.6038	0.425917	0.678385	0.456679	0.49918	0.888754					67.7384	0.360648	0.399775	0.752885	0.385564	NA		61.3537	0.242118	0.506077	0.23292	0.629367	1
ENSMUSG00000005161	Prdx2	25526.5	1.54479	0.560062	5.7944	0.0160773	0.171561		47141.8	0.260192	0.326664	0.652895	0.41908	0.67799		34628.4	1.01944	0.459891	3.6732	0.055294	0.417536					44862.4	-0.243485	0.261204	0.866148	0.352024	0.773826		48245	0.232927	0.387786	0.365948	0.545221	1
ENSMUSG00000005198	Polr2a	681.957	-0.25048	0.546205	0.239695	0.624426	0.874297		642.988	0.0203839	0.254347	0.00643376	0.93607	0.976481		757.856	-0.199291	0.384718	0.293754	0.587825	0.918484					519.07	-0.100469	0.230272	0.194199	0.659445	0.915094		901.055	-0.143569	0.318869	0.200654	0.654193	1
ENSMUSG00000005204	Senp3	159.573	-0.151531	0.569529	0.0769047	0.781537	0.936084		126.287	0.0355761	0.261671	0.0181932	0.892705	0.955186		162.903	-0.501283	0.390422	1.8527	0.17347	0.656186					113.678	-0.0166533	0.278631	0.00338533	0.953602	0.987781		155.679	0.0543854	0.375989	0.0209829	0.884825	1
ENSMUSG00000005225	Plekha8	15.3312	-0.897167	1.48987	0.365885	0.545256	0.840186		9.38187	-0.785559	0.79877	0.906352	0.341084	0.610063		14.8825	0.0721224	0.892904	0.00796881	0.928869	0.991872					13.7138	1.58539	0.66154	4.91203	0.0266702	NA		20.1656	0.321117	0.637915	0.258204	0.611357	1
ENSMUSG00000005233	Spc25	110.094	1.204	1.23216	0.494747	0.481817	0.804295		97.4934	0.149104	0.435338	0.116882	0.732441	0.878041		114.581	-0.0892837	0.803994	0.00856579	0.92626	0.991872					84.3252	-0.201724	0.341494	0.341744	0.558824	NA		97.1854	0.143717	0.526093	0.0746704	0.784654	1
ENSMUSG00000005237	Dnah2	2.76314	5.21328	3.35508	1.8559	0.173099	NA		4.48073	-0.108464	0.958135	0.0120384	0.912632	0.96554		2.84252	3.42374	2.03512	2.4837	0.115031	NA					5.05589	0.186705	0.666712	0.066812	0.796036	NA		3.80829	-0.750594	1.26518	0.338695	0.560583	1
ENSMUSG00000005251	Ripk4	1.96979	5.35299	4.5022	1.1904	0.275249	NA		16.9597	-2.47029	1.18882	3.30569	0.0690404	0.253054		14.2502	7.59491	1.55727	24.3873	7.87852e-07	0.000426743	F				17.482	-0.543399	1.37059	0.0744196	0.785007	NA		16.1294	-0.166191	0.977273	0.0244369	0.875778	1
ENSMUSG00000005262	Ufd1	162.792	-0.530925	0.557205	1.00742	0.315521	0.688527		189.014	-0.266111	0.280143	0.915441	0.338675	0.608137		231.806	-0.113732	0.317586	0.125203	0.723459	0.953048					206.883	0.624123	0.23531	6.78791	0.00917774	0.224969		247.695	-0.26945	0.286069	0.867833	0.351556	1
ENSMUSG00000005267	Zfp287	21.9839	1.03603	1.5971	0.485659	0.48587	0.805929		16.9536	0.789323	0.679887	1.31414	0.251646	0.523239		18.0881	-0.399196	0.665534	0.405065	0.524485	0.901097					17.147	-0.102378	0.517246	0.0387343	0.843976	NA		24.0963	0.335379	0.547309	0.382052	0.536507	1
ENSMUSG00000005268	Prlr	19.0439	-3.29721	2.92667	0.397603	0.52833	0.830934		30.4683	-6.3911	1.47902	12.8349	0.000340219	0.00669331		59.2576	3.93716	2.55664	1.03708	0.308501	0.77691	B				3.47855	1.93413	1.02945	2.42277	0.119583	NA		44.4625	-5.10171	1.92947	4.21461	0.0400774	1
ENSMUSG00000005299	Letm1	120.686	-1.30822	0.985836	2.21877	0.136341	0.496001		101.434	-0.135246	0.340286	0.156854	0.69207	0.857536		146.622	-0.587789	0.581928	1.20072	0.273178	0.752315					81.8073	0.0805785	0.248172	0.106945	0.743649	NA		155.345	-0.1154	0.299726	0.14768	0.700762	1
ENSMUSG00000005312	Ubqln1	317.346	0.1979	0.524015	0.14821	0.700252	0.904627		405.249	-0.129758	0.300107	0.181361	0.670206	0.844265		442.65	0.657581	0.451073	2.22501	0.135792	0.605323					333.536	0.0724814	0.153117	0.221356	0.638009	0.909732		537.126	-0.378786	0.342355	1.18883	0.275565	1
ENSMUSG00000005338	Cadm3	11.3272	7.95311	2.66132	7.91011	0.00491593	0.0889948		17.9107	1.69273	0.751306	5.10814	0.0238138	0.13224		4.95637	5.26325	2.08139	4.541	0.0330923	0.331196					23.5644	0.148026	0.367462	0.162623	0.686753	NA		9.05756	-0.0366266	1.0096	0.0012928	0.971318	1
ENSMUSG00000005339	Fcer1a	15.7505	-0.357414	1.27552	0.0767633	0.781733	0.936135		14.1844	-1.21961	1.06948	1.28467	0.257032	0.528519		21.6527	-0.265412	0.91085	0.0698644	0.791534	0.969495					15.6688	1.11415	0.85144	1.59668	0.206374	NA		29.3237	1.26132	0.723852	3.19112	0.0740393	1
ENSMUSG00000005354	Txn2	1029.17	1.77943	0.499643	10.6577	0.00109615	0.0363273		1821.84	1.26816	0.333189	14.7499	0.000122752	0.00302179		849.455	0.409866	0.40994	0.864376	0.352517	0.809775	C		TXN2		1853.37	-0.412422	0.303892	1.89713	0.1684	0.615376		953.318	0.096471	0.298354	0.104911	0.746014	1
ENSMUSG00000005355	Casp14	20.8054	-0.671197	1.9568	0.125915	0.722705	0.91237		26.1423	2.1834	1.80251	0.193358	0.660136	0.83914		12.1313	-0.028415	1.69892	0.000338989	0.98531	0.998163					19.1005	-0.89724	1.31537	0.420592	0.516642	NA		23.0477	2.4542	1.58926	2.51439	0.112811	1
ENSMUSG00000005362	Crbn	105.052	-1.15266	0.575459	4.14771	0.0416909	0.282615		115.925	-0.405983	0.345594	1.38102	0.239928	0.510944		149.074	-0.408022	0.5112	0.648908	0.420504	0.847082					132.357	0.713891	0.318238	4.85611	0.0275484	0.333839		159.85	0.0604576	0.434017	0.0194505	0.889083	1
ENSMUSG00000005364	Il5ra	29.4151	0.267191	1.08753	0.0639736	0.800322	0.944464		22.1873	-0.625804	0.648031	0.914806	0.338842	0.608255		37.8198	0.158707	0.681847	0.0535775	0.816951	0.97309					19.8863	0.81821	0.573772	1.92536	0.165267	NA		43.2063	0.0204566	0.464668	0.00195127	0.964766	1
ENSMUSG00000005370	Msh6	12.7549	3.62046	1.7475	2.76276	0.0964815	0.425642		13.874	-0.854885	0.550363	2.30672	0.128815	0.362886		15.5917	1.95189	0.895993	3.35831	0.0668665	0.453385					9.8726	0.101828	0.449878	0.0495498	0.823849	NA		22.7428	-0.798767	0.505669	2.43984	0.118288	1
ENSMUSG00000005371	Fbxo11	59.9551	-0.43293	0.732141	0.3606	0.548173	0.842162		55.9056	-0.394549	0.326709	1.44738	0.228949	0.498425		69.7387	-0.248398	0.470306	0.303904	0.581445	0.916888					50.5701	0.134831	0.285717	0.213693	0.643888	NA		75.1577	-0.335001	0.399928	0.689394	0.406371	1
ENSMUSG00000005374	Tbl2	24.6608	1.52217	1.11223	1.58857	0.20753	0.585711		33.2789	-0.177413	0.440584	0.156074	0.692797	0.857578		31.7616	1.79247	0.630566	7.59463	0.00585426	0.143383					31.0036	0.322832	0.348761	0.861689	0.353267	NA		46.4612	0.0165195	0.485893	0.00115291	0.972913	1
ENSMUSG00000005378	Bud23	50.9986	-1.06403	1.08348	1.24613	0.264292	0.642551		40.6354	-0.495125	0.512446	0.907699	0.340726	0.609797		57.7736	-0.344682	0.709492	0.289731	0.590393	0.919414					34.943	0.54815	0.396229	1.67472	0.195627	NA		81.5979	0.563896	0.447422	1.65118	0.198798	1
ENSMUSG00000005397	Nid1	16.4026	0.863489	1.19663	0.491688	0.483175	0.804678		18.9335	-0.350174	0.840038	0.179077	0.672168	0.845289		20.2147	0.730288	0.757257	0.831411	0.361865	0.814969					14.6462	-0.107137	0.655982	0.0249881	0.874397	NA		25.2865	0.24339	0.689415	0.127236	0.721316	1
ENSMUSG00000005410	Mcm5	120.071	-0.162178	0.64284	0.0706291	0.790423	0.941446		102.764	-0.318193	0.359236	0.744435	0.388244	0.65225		134.627	-0.14495	0.376195	0.166166	0.683542	0.941806					89.7577	0.289228	0.345687	0.673547	0.411818	NA		150.235	-0.288339	0.289792	0.971325	0.32435	1
ENSMUSG00000005413	Hmox1	87.6591	-1.71618	0.596002	9.22643	0.00238547	0.0569763		78.3614	1.05285	0.425317	5.90238	0.0151204	0.0997463		88.9061	-0.8235	0.645482	2.09944	0.147353	0.621085					80.7215	0.333098	0.327489	0.982304	0.321631	NA		72.5822	-0.113322	0.553807	0.0417042	0.838185	1
ENSMUSG00000005417	Mprip	270.203	-1.20781	0.536128	5.85004	0.0155767	0.168872		284.969	-0.291818	0.294626	0.989014	0.319983	0.591918		389.39	-0.623364	0.428057	1.94458	0.163172	0.64531					223.417	-0.11219	0.179319	0.393158	0.530644	0.864806		424.55	0.46839	0.285013	2.77355	0.0958336	1
ENSMUSG00000005442	Cic	242.167	0.289485	0.762893	0.166426	0.683308	0.897079		212.932	-0.270154	0.32839	0.67932	0.409821	0.670206		273.03	-0.0625662	0.489927	0.0160976	0.899038	0.985842				CIC	159.382	0.0290529	0.26807	0.0115813	0.9143	0.97888		293.053	-0.339414	0.387284	0.749402	0.386666	1
ENSMUSG00000005447	Pafah1b3	79.4033	1.25573	0.714554	3.09675	0.0784489	0.386933		93.4661	-1.13264	0.546553	3.98533	0.045898	0.199178		133.705	1.51524	0.549097	7.04633	0.0079428	0.164983					46.4406	-0.0242196	0.474266	0.00264296	0.958999	NA		172.411	-0.271405	0.411445	0.42597	0.513973	1
ENSMUSG00000005465	Il27ra	77.0953	-0.942804	0.637185	2.40244	0.121146	0.472562		61.8472	-0.0108114	0.352978	0.000922312	0.975772	0.992988		77.7727	-0.713495	0.461521	2.84658	0.0915686	0.516858					64.1184	0.353033	0.310166	1.18478	0.276385	NA		79.6214	0.0144025	0.324846	0.00197033	0.964595	1
ENSMUSG00000005469	Prkaca	660.435	-0.778534	0.524747	2.37071	0.12363	0.475683		737.74	-0.578944	0.214413	7.2548	0.00707119	0.0600972		974.612	-0.174963	0.311991	0.302727	0.582178	0.916888					494.529	-0.327249	0.213561	2.40608	0.120865	0.54366		1069.47	-0.186502	0.253168	0.534595	0.464682	1
ENSMUSG00000005470	Asf1b	210.001	0.867789	0.781812	1.14684	0.284211	0.660136		351.475	1.7336	0.366066	22.5305	2.06832e-06	0.000109911		104.85	-0.434695	0.472093	0.913004	0.339319	0.799112	B				451.549	0.0694586	0.274825	0.0639197	0.800405	0.949673		115.784	0.244099	0.339547	0.52267	0.469705	1
ENSMUSG00000005481	Ddx39	23.1764	-1.51842	1.14216	1.72421	0.189152	0.566124		38.6579	-0.275482	0.389624	0.51021	0.475048	0.720623		48.0996	0.356528	0.473461	0.554844	0.456345	0.864894					32.3389	0.276231	0.319566	0.737012	0.39062	NA		56.0522	-0.0264813	0.413177	0.00410817	0.948895	1
ENSMUSG00000005483	Dnajb1	245.117	-0.331646	0.542345	0.35131	0.553373	0.844422		260.124	0.148154	0.328368	0.197973	0.656362	0.837165		245.522	-0.510297	0.423989	1.58188	0.20849	0.699795					228.103	-0.25711	0.24412	1.05967	0.303291	0.73775		232.327	-0.410351	0.299169	1.82707	0.176474	1
ENSMUSG00000005501	Usp40	67.6203	2.82605	1.29786	2.45035	0.117499	0.464864		59.0016	0.503561	0.519281	0.947457	0.330367	0.600634		58.3507	0.455932	0.96858	0.133051	0.715289	0.951116					58.4257	-0.141174	0.357165	0.158746	0.690314	NA		70.3993	0.166598	0.7167	0.053695	0.816754	1
ENSMUSG00000005506	Celf1	1340.5	1.59733	0.489207	8.69467	0.00319141	0.0683999		1604.68	1.00959	0.258682	15.2966	9.18817e-05	0.00244131		1260.2	0.213222	0.376489	0.269083	0.603948	0.922511	B				1489.6	-0.454905	0.203233	5.10445	0.0238645	0.317789		1370.7	0.187279	0.23752	0.629671	0.427476	1
ENSMUSG00000005510	Ndufs3	122.858	-0.758063	0.675573	1.45445	0.227815	0.609807		107.721	-0.376962	0.302609	1.54133	0.21442	0.480451		153.999	-0.351154	0.439693	0.710764	0.39919	0.838131		ENSMUSG00000005510			92.6784	0.306151	0.22821	1.76366	0.184169	NA		168.237	0.272459	0.304544	0.817488	0.365916	1
ENSMUSG00000005514	Por	131.41	0.646175	0.760258	0.705503	0.400941	0.75775		203.811	0.131986	0.288013	0.20727	0.648915	0.832371		180.372	0.639711	0.353739	3.21446	0.0729903	0.470072					173.552	-0.213275	0.26067	0.682655	0.408674	0.807871		219.617	-0.121941	0.325468	0.139545	0.708733	1
ENSMUSG00000005533	Igf1r	210.568	-0.0868607	0.485368	0.0326283	0.856656	0.963613		231.731	0.816089	0.383812	4.58286	0.0322934	0.161254		214.556	-0.636625	0.422074	2.33126	0.126799	0.59326					295.67	0.390542	0.314887	1.4903	0.22217	0.66748		221.783	-0.24855	0.341301	0.519565	0.471027	1
ENSMUSG00000005534	Insr	67.7208	-0.0188697	0.77599	0.000632753	0.979932	0.996306		66.064	-1.04934	0.318179	10.4472	0.00122835	0.0178862		105.177	0.446247	0.455226	0.980513	0.322072	0.786123	B	ENSMUSG00000005534			48.1569	0.388974	0.267058	1.93825	0.163859	NA		98.6803	-0.751539	0.40613	3.2415	0.0717948	1
ENSMUSG00000005540	Fcer2a	422.749	-2.16479	0.723333	11.5314	0.000684299	0.0262565		419.013	-1.63433	0.458718	11.6153	0.000654112	0.0110562		808.176	-0.0861802	0.471814	0.036843	0.847785	0.974801	C				155.002	-0.200971	0.378946	0.277412	0.598403	0.898939		786.2	-0.519767	0.330411	2.37323	0.123432	1
ENSMUSG00000005547	Cyp2a5	5.21397	-1.98887	2.37321	0.806503	0.369156	NA		23.8615	-3.94024	1.59675	3.30837	0.068928	0.252945		32.6041	3.15958	1.08411	7.87253	0.00501913	0.130174					10.0838	0.0763856	1.31892	-0.0229884	1	NA		34.6117	-0.150104	0.682263	0.0313343	0.859497	1
ENSMUSG00000005566	Trim28	436.04	0.398655	0.415101	0.90539	0.341341	0.711238		440.097	-0.0603654	0.2712	0.0494045	0.824103	0.923644		486.015	0.0655752	0.429875	0.0230918	0.879218	0.982012					353.726	-0.22814	0.163433	1.96195	0.161305	0.603707		518.294	-0.606522	0.338494	3.05591	0.080444	1
ENSMUSG00000005575	Ube2m	1210.46	0.686793	0.531367	1.42712	0.232235	0.612823		2030	0.508358	0.331631	2.40572	0.120893	0.349875		1614.42	0.725667	0.304112	4.97867	0.0256617	0.290111					1810.08	-0.247406	0.271158	0.84545	0.357843	0.778525		2039.18	0.44991	0.281778	2.62552	0.105158	1
ENSMUSG00000005580	Adcy9	46.1646	0.223346	0.951342	0.0526058	0.818589	0.952267		46.0826	0.474352	0.543295	0.76957	0.38035	0.645908		63.3527	0.158694	0.856094	0.021491	0.883449	0.982747					38.1823	-0.55485	0.464431	1.30089	0.25405	NA		57.6262	0.258001	0.615964	0.175652	0.675137	1
ENSMUSG00000005583	Mef2c	1137.04	0.571097	0.630699	0.661927	0.41588	0.768132		1300.2	0.511716	0.264169	3.727	0.0535394	0.217527		1356.04	0.0659003	0.438141	0.0201229	0.887194	0.98329					989.685	-0.616038	0.228077	7.47108	0.00626979	0.192471		1498.81	-0.0210685	0.303532	0.00480277	0.944749	1
ENSMUSG00000005609	Ctr9	72.6958	1.21958	0.786293	1.95774	0.161755	0.531681		84.5598	0.582148	0.286914	4.09214	0.043083	0.192197		77.8982	0.633784	0.46347	1.81675	0.177701	0.660678					77.6043	-0.0293483	0.259493	0.0127155	0.910218	NA		108.06	-0.129978	0.371585	0.121561	0.727348	1
ENSMUSG00000005610	Eif4g2	5654.99	0.673317	0.468583	1.7722	0.18311	0.558215		6940.32	-0.00539963	0.197974	0.000743915	0.978241	0.993907		7449.26	0.417304	0.349009	1.26025	0.261604	0.742457					5845.63	-0.123856	0.137083	0.82046	0.365046	0.77857		8575.33	-0.191243	0.244314	0.603585	0.437214	1
ENSMUSG00000005611	Mrvi1	1111.28	0.100138	0.496132	0.0409633	0.839609	0.958965		1596.03	0.136589	0.317727	0.188535	0.664139	0.841543		1553.24	0.104486	0.371868	0.0681738	0.794015	0.969495					1511.69	-0.0531924	0.217287	0.0599888	0.806514	0.949673		2014.92	0.335978	0.240603	1.99286	0.158042	1
ENSMUSG00000005615	Pcyt1a	46.6201	1.47878	1.26197	0.97835	0.322606	0.694769		65.1523	1.42092	0.432196	10.7825	0.00102466	0.0154515		34.592	-0.202605	0.685141	0.073321	0.786561	0.969379	B				68.028	-0.355844	0.315097	1.27931	0.258027	NA		39.8983	0.641428	0.484233	1.81598	0.177792	1
ENSMUSG00000005621	Zfp592	173.193	0.10825	0.618194	0.0330693	0.855701	0.963266		179.889	-0.0980234	0.24236	0.1647	0.684866	0.853475		198.918	0.0431777	0.36765	0.014258	0.904953	0.986749					144.383	-0.166984	0.177362	0.892692	0.344749	0.767664		239.778	-0.351087	0.276744	1.57379	0.209657	1
ENSMUSG00000005625	Psmd4	12547.7	0.501324	0.408325	1.4203	0.233354	0.613168		21225.2	0.908987	0.31147	8.62781	0.0033107	0.035767		14352.7	0.277374	0.298092	0.818993	0.365475	0.817267	B	ENSMUSG00000005625			19342.9	-0.457424	0.278477	2.73393	0.098237	0.504454		16476.7	0.040322	0.253496	0.0253714	0.873445	1
ENSMUSG00000005656	Snx6	153.967	0.0944042	0.510556	0.0335264	0.854718	0.963004		179.466	0.244438	0.240082	1.02637	0.311012	0.58296		183.055	-0.0215683	0.304287	0.0051101	0.943012	0.994193					175.537	0.0850501	0.186874	0.203295	0.652074	0.914157		209.939	-0.0213466	0.219673	0.00943272	0.922629	1
ENSMUSG00000005667	Mthfd2	830.877	1.76404	0.759156	4.13897	0.0419066	0.283763		1214.41	1.03232	0.479066	4.7877	0.0286637	0.148805		946.41	0.659944	0.58707	0.988087	0.32021	0.784579					1983.18	0.163243	0.555156	0.072202	0.788157	0.94812		1783.98	0.923839	0.492787	3.70823	0.0541449	1
ENSMUSG00000005672	Kit	3.60746	5.31291	3.7403	1.3717	0.241519	NA		7.63472	-1.53579	0.900283	2.73789	0.0979943	0.308935		10.2526	4.17455	1.55734	3.97452	0.0461937	0.385077					7.41585	0.731145	0.781442	0.740008	0.389658	NA		8.24379	-2.352	1.24627	3.04031	0.0812202	1
ENSMUSG00000005682	Pan2	26.0772	-0.762585	1.26262	0.452699	0.501056	0.814383		33.7346	0.114596	0.477904	0.0574908	0.810507	0.917546		35.2134	-0.0946967	0.722242	0.0195743	0.888733	0.983595					27.2128	-0.268233	0.368669	0.54372	0.460895	NA		42.526	-0.0808733	0.555333	0.0209747	0.884848	1
ENSMUSG00000005683	Cs	403.124	0.481042	0.467797	1.09413	0.295559	0.669579		429.712	-0.416066	0.290269	2.03479	0.153735	0.400721		507.231	0.568425	0.383107	2.1626	0.141406	0.613739					340.8	0.211578	0.204713	1.01512	0.31368	0.748708		613.883	-0.32046	0.296299	1.14249	0.285127	1
ENSMUSG00000005686	Ampd3	45.2553	-1.81277	0.886141	4.72127	0.0297917	0.239528		39.5553	0.854464	0.38983	4.86264	0.0274443	0.144612		44.1165	-1.46645	0.608629	7.08988	0.00775204	0.162943					52.8965	0.485027	0.257539	3.48367	0.061977	NA		41.9184	0.364525	0.546223	0.459385	0.497911	1
ENSMUSG00000005687	Bcas2	441.84	0.895085	0.613415	1.94377	0.163259	0.534824		756.183	1.56537	0.29327	28.6131	8.83821e-08	7.11057e-06		359.996	-0.275653	0.380486	0.502851	0.47825	0.876386	B				809.094	-0.35972	0.227358	2.57158	0.108799	0.526569		442.668	0.39391	0.282296	1.99745	0.157564	1
ENSMUSG00000005696	Sh2d1a	10.9369	0.643245	2.34603	0.031649	0.8588	0.964336		13.2262	0.277003	0.605614	0.214224	0.643476	0.829751		15.7838	-0.0369903	1.13715	0.000617869	0.980169	0.997964					12.9039	0.375256	0.506142	0.523869	0.469196	NA		17.6432	0.0641993	0.609204	0.0109019	0.916842	1
ENSMUSG00000005698	Ctcf	382.544	0.412335	0.471782	0.70387	0.401486	0.758266		438.627	0.201879	0.23713	0.716946	0.397147	0.659896		508.517	0.31788	0.289975	1.12153	0.28959	0.764125					366.387	-0.046577	0.191801	0.0587054	0.808554	0.949673		622.813	0.259956	0.298032	0.775025	0.378667	1
ENSMUSG00000005699	Pard6a	67.3066	-2.20708	0.808349	9.1046	0.00254967	0.0595037		57.3003	-0.666538	0.351775	3.48786	0.0618204	0.238025		99.4518	-0.661466	0.499493	2.06774	0.150445	0.623663					40.2247	0.0739851	0.297984	0.0620256	0.803323	NA		106.378	0.124045	0.388893	0.102373	0.749	1
ENSMUSG00000005716	Pvalb	10.8819	2.84926	3.02676	0.253366	0.614715	0.870165		2.67357	-0.175581	1.67761	0.00805266	0.928497	NA		6.69828	-1.58701	1.80192	0.593723	0.440983	0.857185					1.44811	-0.241641	1.53575	0.0210777	0.884567	NA		3.99552	0.413148	1.35245	0.0943011	0.758779	1
ENSMUSG00000005718	Tfap4	19.52	1.12194	1.54697	0.483207	0.486973	0.80639		31.6891	0.319174	0.547809	0.327555	0.567102	0.781511		32.1601	1.19156	0.587698	3.81925	0.0506669	0.401026					24.8194	0.0846368	0.425449	0.0361517	0.849202	NA		44.7958	0.37824	0.409564	0.877044	0.349012	1
ENSMUSG00000005732	Ranbp1	80.5988	-0.433556	0.704481	0.371227	0.542336	0.838355		91.0298	0.165777	0.294782	0.316569	0.573677	0.785539		98.5628	-0.226354	0.329434	0.469556	0.493192	0.885491					67.8634	-0.526616	0.251173	4.49067	0.0340803	NA		124.753	0.670596	0.274326	6.19128	0.0128381	1
ENSMUSG00000005763	Cd247	249.78	1.05716	0.51353	3.91595	0.04783	0.305278		231.703	-0.0722125	0.293472	0.0606759	0.805431	0.915314		285.138	0.212205	0.404574	0.22578	0.63467	0.929611					218.748	0.158882	0.240225	0.430688	0.511651	0.852572		349.67	-0.0517666	0.243097	0.0450506	0.831911	1
ENSMUSG00000005774	Rfx5	8.23864	-4.24004	3.25863	0.574297	0.448556	0.783997		2.20035	0.491796	1.62298	0.0546423	0.815174	NA		7.88905	-2.07645	1.75468	1.3399	0.247052	0.731995					2.04098	0.0586615	1.14091	0.00253669	0.959831	NA		3.03005	0.757197	1.45108	0.291606	0.589193	1
ENSMUSG00000005779	Psmb4	577.309	0.119695	0.496991	0.0521352	0.819389	0.952364		718.766	0.111654	0.203175	0.305476	0.58047	0.791046		773.859	0.292782	0.331566	0.749992	0.386479	0.8318		ENSMUSG00000005779			666.118	0.18272	0.175216	1.06997	0.300951	0.737018		1033.61	0.382894	0.211093	3.37695	0.0661144	1
ENSMUSG00000005800	Mmp8	613.334	0.144022	0.509674	0.0836725	0.772381	0.932093		948.413	2.35912	0.534415	19.0265	1.28916e-05	0.000484732		542.429	-0.855463	0.6344	1.99361	0.157963	0.633068	B				2329.37	1.41613	0.454918	8.58981	0.00338049	0.166385		606.629	0.502735	0.502345	1.03702	0.308516	1
ENSMUSG00000005802	Slc30a4	39.747	1.71653	0.838827	3.89875	0.0483222	0.306024		42.6653	-0.154798	0.614417	0.0584187	0.809013	0.917081		50.03	1.58718	0.526222	9.22644	0.00238545	0.0884059					23.6765	-0.397234	0.461078	0.732018	0.39223	NA		59.9865	-0.646877	0.410099	2.38907	0.122186	1
ENSMUSG00000005803	Sqor	74.3	-0.851168	0.790759	1.28975	0.256094	0.633065		85.4278	0.918155	0.37531	6.13571	0.0132478	0.0918988		82.4773	-0.817726	0.599373	2.00274	0.157015	0.630999					126.132	0.746249	0.282806	6.56653	0.0103915	0.233731		90.9904	0.299269	0.454228	0.444653	0.504885	1
ENSMUSG00000005804	Bloc1s6	68.1869	1.60425	0.787818	3.32735	0.0681365	0.363147		108.359	0.316625	0.247583	1.64657	0.199426	0.461504		86.1581	0.995815	0.45783	3.71509	0.0539228	0.410041					92.7199	-0.26817	0.209204	1.66075	0.197502	NA		110.025	-0.124424	0.355583	0.12155	0.72736	1
ENSMUSG00000005813	Metap1	152.98	-0.787194	0.662153	1.62551	0.202325	0.580308		122.834	-0.525127	0.274083	3.59448	0.0579718	0.228911		185.051	-0.258656	0.402915	0.473507	0.491378	0.884581					101.097	0.374146	0.207737	3.18959	0.0741088	NA		187.302	-0.0907262	0.29207	0.0961533	0.756496	1
ENSMUSG00000005823	Gpr108	169.805	0.349026	0.520807	0.459614	0.497805	0.811254		196.177	-0.512705	0.342746	2.24547	0.134006	0.37162		227.426	0.491322	0.324764	2.35333	0.125016	0.590014					155.065	0.0192711	0.249319	0.00602602	0.938124	0.986902		287.473	-0.272347	0.27515	0.96239	0.326585	1
ENSMUSG00000005824	Tnfsf14	141.22	-2.24225	0.707441	11.8167	0.000587022	0.0241471		144.798	-0.713221	0.336468	4.44339	0.0350366	0.169565		209.152	-0.518047	0.476569	1.39874	0.236934	0.722984	A				148.721	0.730307	0.246496	8.39137	0.00377007	0.16966		243.408	0.302717	0.350195	0.763203	0.382328	1
ENSMUSG00000005836	Gata6	14.0784	-1.71296	3.91458	0.0997664	0.75211	0.924447		19.3894	-5.40375	2.3711	3.65987	0.055738	0.223402		37.2252	4.80016	3.53356	0.858942	0.354035	0.811635					0.963807	0.424371	1.84905	0.0420667	0.837493	NA		28.9695	-7.14328	2.91812	3.38989	0.0655972	1
ENSMUSG00000005846	Rsl1d1	385.563	0.182695	0.44244	0.177379	0.673636	0.893364		307.414	-0.408047	0.291803	1.90067	0.168003	0.420622		413.481	-0.00692789	0.362238	0.000397395	0.984095	0.998163					264.585	0.233132	0.215123	1.12939	0.287906	0.730007		488.309	0.0574363	0.247332	0.054201	0.815908	1
ENSMUSG00000005871	Apc	158.013	-0.172067	0.594285	0.08756	0.767302	0.930228		177.122	-0.528497	0.284293	3.38017	0.0659854	0.246731		245.16	0.298141	0.370972	0.639902	0.423746	0.848785		ENSMUSG00000005871			137.842	0.13815	0.18455	0.552396	0.45734	0.830748		267.681	-0.248532	0.338742	0.528859	0.467087	1
ENSMUSG00000005873	Reep5	771.597	-1.32431	0.597872	5.9758	0.0145035	0.162868		733.727	-0.515422	0.249173	4.23796	0.0395297	0.182809		1093.91	-0.233382	0.435306	0.329736	0.565815	0.912811					566.882	0.270726	0.222265	1.47421	0.224683	0.670351		1116.79	-0.0193465	0.303236	0.0040692	0.949137	1
ENSMUSG00000005881	Ergic3	381.853	-0.20695	0.618206	0.128037	0.720477	0.911689		417.936	-0.468116	0.226867	4.22243	0.0398931	0.183764		546.336	0.320378	0.400075	0.668118	0.413708	0.843651					325.988	0.270171	0.215491	1.53052	0.216035	0.659425		564.999	-0.124382	0.296632	0.174375	0.676253	1
ENSMUSG00000005882	Uqcc1	48.6749	0.0506166	0.927043	0.00321805	0.954762	0.989222		43.7858	-1.45359	0.46957	9.29345	0.00229974	0.027784		72.5845	0.0936296	0.442741	0.0384497	0.844543	0.974417	B				30.6402	0.616106	0.356745	2.79034	0.094834	NA		82.0678	-0.247079	0.333095	0.537918	0.463297	1
ENSMUSG00000005886	Ncoa2	268.258	-0.0302393	0.432437	0.0049687	0.943804	0.987004		385.455	0.730642	0.254123	8.31303	0.00393617	0.0404241		351.807	-0.103151	0.416451	0.056023	0.812896	0.972643	B				359.139	-0.33583	0.238761	2.01165	0.156095	0.600791		351.982	-0.193232	0.346992	0.305354	0.580545	1
ENSMUSG00000005893	Nr2c2	41.1488	3.38126	1.36091	3.75499	0.0526502	0.315617		37.1725	0.910195	0.555424	2.65293	0.103359	0.319964		38.8394	0.893341	0.949141	0.607678	0.435663	0.854098					37.9794	-0.311168	0.445611	0.452969	0.500928	NA		39.1827	-0.122144	0.711249	0.029169	0.864389	1
ENSMUSG00000005897	Nr2c1	14.1129	-1.76238	1.37888	1.59009	0.207313	0.585504		9.7176	-1.16401	0.96097	1.44932	0.228638	0.498182		17.8202	-0.399751	0.920317	0.217139	0.641229	0.931159					6.65717	0.492678	0.767971	0.404858	0.524591	NA		18.2388	-0.895864	0.871285	0.995941	0.318295	1
ENSMUSG00000005899	Smpd4	156.857	1.44053	0.626887	4.34044	0.0372174	0.267417		199.457	0.168591	0.373282	0.207435	0.648786	0.832279		166.357	0.327805	0.545773	0.277896	0.598083	0.921284					194.239	-0.0513452	0.210769	0.0589452	0.808171	0.949673		193.992	0.302283	0.406594	0.559993	0.454263	1
ENSMUSG00000005907	Pex1	65.6274	-0.556103	0.709313	0.660986	0.416212	0.768397		73.7603	-0.159004	0.325771	0.241218	0.623328	0.819551		90.9391	-0.190095	0.389158	0.230265	0.631328	0.928754					69.0918	0.211735	0.322673	0.410984	0.521471	NA		103.604	0.228228	0.43205	0.279388	0.597103	1
ENSMUSG00000005917	Otx1	27.2713	1.9196	2.1963	0.351738	0.553131	0.844394		52.1585	-3.99956	1.57624	3.57119	0.0587902	0.23088		80.345	4.29162	1.12895	11.6017	0.000658929	0.039827	F				13.8273	-1.58789	1.27858	0.208276	0.648122	NA		66.8745	-2.39553	1.20686	3.03989	0.0812413	1
ENSMUSG00000005936	Kctd20	491.64	0.474321	0.42516	1.20334	0.272656	0.649088		952.748	1.6235	0.207114	60.8178	6.26086e-15	2.25407e-12		436.396	-0.503456	0.317261	2.5301	0.111693	0.562338	B				978.878	-0.481317	0.187772	6.75053	0.009372	0.224969		467.474	-0.0258544	0.283459	0.00829919	0.927413	1
ENSMUSG00000005947	Itgae	29.7766	-3.97678	1.24422	10.7156	0.00106236	0.0360877		12.4927	-0.77965	0.560823	1.95447	0.162106	0.41234		34.106	-1.50399	0.611187	7.63571	0.00572239	0.141383	A				6.60337	0.28734	0.695961	0.172135	0.678221	NA		27.4991	-0.628895	0.472888	1.74453	0.186565	1
ENSMUSG00000005949	Ctns	82.3646	-0.299981	1.02127	0.105457	0.745377	0.922359		88.2344	0.536758	0.411633	1.65078	0.198853	0.460693		100.51	0.0180827	0.536513	0.00129581	0.971284	0.996905					74.808	0.116139	0.318057	0.127708	0.72082	NA		96.7999	-0.30341	0.435231	0.476868	0.489845	1
ENSMUSG00000005950	P2rx5	0	NA	NA	NA	NA	NA		1.67791	0.825194	2.57362	0.101202	0.750392	NA		1.23888	2.90638	3.50901	0.598804	0.439035	NA					2.26895	0.359566	2.73243	0.0134375	0.907716	NA		2.99868	2.01714	1.74847	1.43089	0.23162	1
ENSMUSG00000005951	Shpk	11.0619	-2.13069	1.68579	1.94874	0.162722	0.533793		6.35485	-1.42846	1.20007	1.38444	0.239347	0.510491		12.1953	-0.779732	1.24921	0.484322	0.486471	0.881477					5.18636	0.156751	0.861022	0.0266805	0.870249	NA		10.3112	-1.24061	0.967694	1.54322	0.21414	1
ENSMUSG00000005958	Ephb3	40.9365	-0.0183896	1.40832	0.000102319	0.991929	0.998543		99.7374	-2.78693	1.06713	5.49475	0.0190737	0.115278		129.35	3.56549	0.875026	14.3315	0.000153281	0.0171322	F				41.9592	-0.628584	0.977795	0.302501	0.582319	NA		135.632	-0.352309	0.60925	0.326285	0.567855	1
ENSMUSG00000005968	Tuft1	10.7795	-0.0902311	2.02057	0.00230021	0.961748	0.991352		14.0386	-1.46291	1.10191	1.67991	0.194936	0.456104		17.9925	0.977358	1.20093	0.74896	0.386806	0.831916					9.06093	0.205062	0.896438	0.052765	0.81832	NA		20.2755	-0.953084	0.81934	1.26362	0.260967	1
ENSMUSG00000005973	Rcn1	65.1808	3.15525	1.25034	3.41591	0.0645708	0.353615		83.7063	-1.60398	0.570817	7.02569	0.00803483	0.0651418		110.214	2.93957	0.764297	10.9786	0.00092168	0.0487971	F				50.4333	0.298174	0.429793	0.442541	0.505899	NA		130.938	-0.383204	0.541827	0.485993	0.48572	1
ENSMUSG00000005981	Trap1	10.132	-1.51849	2.20845	0.267984	0.604687	0.865332		13.189	-0.115613	0.739583	0.0246868	0.87515	0.948096		12.6823	0.466125	1.09824	0.203604	0.651828	0.933433					11.2241	-0.161674	0.582552	0.0797044	0.777698	NA		17.0073	-1.01299	0.728922	1.83526	0.175507	1
ENSMUSG00000005983	1700037C18Rik	33.2857	0.686114	1.10014	0.295208	0.586902	0.857662		19.0833	-0.583474	0.752386	0.552788	0.457181	0.707243		33.78	-0.179286	0.740527	0.055109	0.8144	0.972883					15.7421	0.498215	0.52136	0.837903	0.359997	NA		36.5291	0.541858	0.662046	0.690148	0.406114	1
ENSMUSG00000005986	Ankrd13d	4.56838	3.22663	2.84165	0.71913	0.39643	NA		7.77705	-0.366146	0.802773	0.196045	0.657932	0.838188		8.01439	2.42811	1.17268	3.87551	0.0489953	0.395643					6.85393	0.358715	0.538338	0.432857	0.51059	NA		11.4371	-0.244761	0.830557	0.0855716	0.769884	1
ENSMUSG00000006005	Tpr	197.654	3.8152	1.28063	4.29806	0.0381559	0.2716		197.807	1.44163	0.380388	13.8949	0.000193326	0.00442858		178.711	0.890561	0.835956	0.692398	0.40535	0.840357	B				177.581	-0.466575	0.307569	2.29464	0.129822	0.559705		216.907	0.519182	0.421358	1.56689	0.21066	1
ENSMUSG00000006010	Odr4	50.97	-0.935927	0.871835	1.24556	0.264403	0.642564		44.8674	0.137074	0.401908	0.117028	0.732281	0.878041		60.5865	-0.626383	0.527844	1.55799	0.21196	0.701802					45.2258	0.343968	0.324653	1.11043	0.291989	NA		63.3532	0.335148	0.452589	0.558837	0.454729	1
ENSMUSG00000006014	Prg4	7.10175	-0.0578002	2.03929	0.00101488	0.974586	NA		2.74174	-0.792658	1.24327	0.41973	0.517072	NA		6.35698	-0.9522	1.25481	0.678396	0.41014	0.842596					2.39423	0.744536	0.96464	0.624544	0.429364	NA		6.45673	-0.722201	1.06046	0.455889	0.499552	1
ENSMUSG00000006019	Dhx34	17.0259	-3.09381	1.81972	3.7405	0.0531084	0.317586		13.7416	-1.19264	0.881277	1.69492	0.192954	0.45367		24.5279	-1.04574	0.952439	1.47285	0.224897	0.713821					8.67315	-0.10457	0.760244	0.0180945	0.892995	NA		21.7028	-0.719194	0.836899	0.702894	0.401813	1
ENSMUSG00000006021	Kptn	12.3713	9.18851	2.77285	9.27921	0.00231769	0.0558481		16.93	1.04492	0.649544	2.52836	0.111816	0.334706		8.95845	5.85758	1.61725	11.6508	0.000641757	0.0391249	F				19.6791	0.0806033	0.427195	0.035696	0.850145	NA		20.6996	1.06543	0.727369	2.26441	0.132376	1
ENSMUSG00000006024	Napa	3841.32	3.36293	0.630762	19.8058	8.57215e-06	0.00110346		6179.8	1.71245	0.404322	18.0231	2.18243e-05	0.000768439		1846.98	0.896222	0.517938	2.25388	0.13328	0.603336	C				6687.22	-0.413864	0.258569	2.64489	0.103883	0.51636		2283.29	-0.217918	0.39878	0.293235	0.588155	1
ENSMUSG00000006050	Sra1	125.246	-0.519881	0.722808	0.595969	0.44012	0.778938		144.488	-0.144453	0.202951	0.504293	0.47762	0.72144		161.151	-0.153221	0.397916	0.16208	0.687248	0.942591					118.655	-0.143234	0.174994	0.678741	0.410021	0.807871		180.102	-0.17972	0.240834	0.550257	0.458213	1
ENSMUSG00000006057	Atp5g1	228.26	0.672993	0.598113	1.07495	0.299829	0.673746		240.675	-0.511713	0.372561	1.80525	0.17908	0.43585		248.304	0.570942	0.482053	1.42386	0.232769	0.720746		ENSMUSG00000006057			198.878	-0.0122214	0.232165	0.00277785	0.957967	0.987936		274.105	-0.764912	0.330494	5.04372	0.0247154	1
ENSMUSG00000006058	Snf8	244.461	-0.0238074	0.457984	0.00273356	0.958303	0.990613		349.343	0.411455	0.26095	2.50188	0.113711	0.33804		318.648	0.157394	0.337681	0.213046	0.644391	0.931511					329.428	-0.0176255	0.184822	0.00905338	0.924196	0.982336		413.795	0.130849	0.284437	0.213879	0.643744	1
ENSMUSG00000006095	Tbcb	182.349	-0.161914	0.688753	0.0488545	0.825069	0.954411		181.66	-0.110727	0.249378	0.196669	0.657423	0.838102		205.39	-0.0129904	0.406416	0.00104689	0.974188	0.996905					145.746	-0.049232	0.192845	0.0635827	0.80092	0.949673		241.028	-0.0182519	0.219451	0.00691047	0.933749	1
ENSMUSG00000006127	Inpp5k	260.751	0.962834	0.456813	4.29494	0.0382259	0.271898		311.629	0.945054	0.260552	13.1776	0.000283314	0.00595622		241.59	0.0582731	0.350069	0.0267414	0.870103	0.980474	B				306.428	-0.217777	0.205418	1.11386	0.291245	0.731371		277.029	-0.054859	0.279993	0.0382459	0.84495	1
ENSMUSG00000006134	Crkl	341.133	0.0219277	0.489871	0.00183149	0.965864	0.991938		352.815	0.34694	0.25014	1.93863	0.163818	0.414538		335.465	-0.578349	0.373264	2.3628	0.124259	0.588074					355.569	-0.0679825	0.186438	0.135076	0.713226	0.930312		371.995	-0.248671	0.291942	0.710988	0.399116	1
ENSMUSG00000006143	Upk3bl	66.0439	0.870679	1.58528	0.324361	0.568998	0.851662		332.243	-3.81566	1.51752	3.99803	0.0455535	0.198552		438.082	4.37358	1.53538	6.03431	0.0140304	0.220525					173.382	0.636331	1.18858	0.239052	0.624892	0.905646		429.93	-0.711577	0.879774	0.507702	0.476135	1
ENSMUSG00000006154	Eps8l1	24.76	-0.911807	1.52251	0.373606	0.541045	0.83765		16.4317	-1.80149	1.08064	2.45454	0.117185	0.343355		33.3175	-0.297259	0.939877	0.116189	0.733205	0.955093					8.78933	-0.296261	0.923413	0.0495419	0.823862	NA		31.6686	0.704662	0.843368	0.728119	0.393494	1
ENSMUSG00000006169	Clint1	283.155	-0.259958	0.449792	0.335455	0.562464	0.847091		272.32	0.134385	0.256039	0.270419	0.603051	0.807509		332.461	-0.233347	0.312001	0.604037	0.437042	0.854522					241.46	0.093914	0.17215	0.290086	0.590165	0.895493		328.835	-0.3017	0.269882	1.22349	0.268676	1
ENSMUSG00000006179	Prss16	3.47861	6.05871	4.69931	1.1905	0.27523	NA		3.10868	-2.06293	1.38254	2.31932	0.127776	NA		2.95029	4.9847	2.16041	5.10606	0.0238424	NA					4.28093	2.57681	0.965558	5.03294	0.0248696	NA		3.84905	-1.17303	1.35176	0.705821	0.400835	1
ENSMUSG00000006191	Cdkal1	63.5463	-0.117006	0.699269	0.0274698	0.868361	0.967232		66.4572	-0.72161	0.3422	4.44891	0.0349235	0.169281		91.6957	0.207498	0.3838	0.277964	0.598039	0.921284					45.8662	-0.138817	0.289046	0.225432	0.634932	NA		99.451	-0.0140419	0.286212	0.00240711	0.96087	1
ENSMUSG00000006215	Zbtb17	24.6378	0.798333	1.11362	0.443594	0.505393	0.817628		17.5692	-0.575094	0.578293	0.996098	0.318257	0.590544		28.6269	0.0745456	0.671364	0.0101121	0.919901	0.990743					18.9986	0.833598	0.577532	1.7323	0.188117	NA		31.0647	0.352079	0.566048	0.39211	0.531192	1
ENSMUSG00000006219	Fblim1	1.04422	1.69054	5.66797	0.0464305	0.829395	NA		2.28292	-0.62634	1.71298	0.164505	0.685042	NA		2.48511	3.29764	2.49006	1.90942	0.167027	NA					2.54772	1.0461	1.24314	0.816678	0.366153	NA		2.43815	-2.61849	2.09906	1.3991	0.236875	1
ENSMUSG00000006221	Hspb7	5.51323	7.62568	3.03221	5.64096	0.0175456	NA		3.01623	-0.743953	1.34779	0.300271	0.583713	NA		1.79028	3.60141	2.44293	1.81832	0.177513	NA					3.25625	0.459648	0.839958	0.29189	0.589012	NA		1.73673	-3.65335	1.95184	3.49173	0.0616759	1
ENSMUSG00000006235	Epor	32.5364	-1.81778	1.05104	3.03962	0.0812552	0.39198		43.9164	0.349993	0.399613	0.78441	0.375796	0.641897		48.5951	-0.567184	0.462091	1.54749	0.213507	0.702035					43.1525	0.0890916	0.294712	0.0913738	0.762438	NA		50.83	0.183168	0.381139	0.231971	0.630067	1
ENSMUSG00000006262	Mob1b	261.344	-0.793478	0.510124	2.49589	0.114144	0.45904		312.575	0.393293	0.304297	1.70782	0.191269	0.451648		327.141	-0.685421	0.39838	2.74746	0.097409	0.52884					291.531	-0.249609	0.198685	1.59198	0.207044	0.652665		322.272	0.22641	0.303834	0.56176	0.453552	1
ENSMUSG00000006273	Atp6v1b2	1368.5	-0.801629	0.500544	2.98153	0.0842196	0.398114		1612.4	-0.263162	0.280039	0.876624	0.349128	0.616983		1882.52	0.160537	0.475052	0.13201	0.716357	0.951302					1475.92	0.274804	0.206543	1.74142	0.186959	0.63696		2067.93	-0.15249	0.316096	0.230091	0.631457	1
ENSMUSG00000006276	Eps15l1	197.075	-0.0483699	0.532396	0.00837785	0.927071	0.982487		305.244	0.961228	0.351894	7.56609	0.00594767	0.0532344		183.858	-0.27542	0.365739	0.58755	0.443368	0.857763					282.375	-0.529376	0.231339	5.41849	0.0199245	0.303599		188.788	-0.336519	0.306332	1.17826	0.27771	1
ENSMUSG00000006281	Tep1	47.3901	-2.49235	0.807341	11.1441	0.000842986	0.0305901		48.8096	-1.5585	0.477945	10.1233	0.00146405	0.0202146		93.2759	-0.162098	0.570597	0.0863431	0.768879	0.964666	C				24.2089	0.293031	0.375401	0.598752	0.439055	NA		111.948	-0.0171704	0.445899	0.00148851	0.969224	1
ENSMUSG00000006288	Ttc5	34.7224	0.548387	0.969795	0.34161	0.558901	0.845593		35.2118	-0.542273	0.360592	2.26253	0.132537	0.369214		52.2415	0.416999	0.53481	0.502257	0.47851	0.876428					23.0161	-0.0367578	0.332421	0.0119303	0.913023	NA		48.8467	-0.165661	0.390914	0.177692	0.673364	1
ENSMUSG00000006289	Osgep	127.441	1.40541	0.572156	5.21827	0.0223507	0.206597		123.624	-0.0011649	0.349463	1.09039e-05	0.997365	1		122.516	0.818179	0.367625	4.7281	0.0296736	0.315195					116.884	0.28125	0.284906	0.888698	0.34583	0.7686		165.594	0.165995	0.294803	0.321408	0.570762	1
ENSMUSG00000006299	Aamp	803.537	0.380719	0.387403	0.974092	0.323662	0.695236		884.31	0.0520768	0.192053	0.0731211	0.786845	0.907889		956.078	0.342402	0.297688	1.38506	0.23924	0.725005					833.291	0.247852	0.126094	3.80408	0.0511278	0.409196		1199.02	-0.0258145	0.220618	0.0136748	0.906908	1
ENSMUSG00000006301	Tmbim1	145.712	-1.36382	0.588566	5.85253	0.0155547	0.168872		209.399	-1.06572	0.218213	23.2756	1.40371e-06	7.89642e-05		300.124	0.407949	0.311557	1.7523	0.185588	0.672801	B				115.065	-0.261887	0.278575	0.904336	0.341622	0.765321		344.435	-0.147306	0.304083	0.232158	0.629928	1
ENSMUSG00000006304	Arpc2	8221.72	-0.140147	0.327182	0.185181	0.666958	0.89218		9495.96	0.162898	0.230712	0.500812	0.479144	0.722302		10599.8	-0.195918	0.367117	0.261487	0.6091	0.923423					8305.46	-0.116434	0.126118	0.853962	0.355434	0.777331		12268.9	0.105935	0.285798	0.138048	0.710229	1
ENSMUSG00000006307	Kmt2b	55.1432	1.01869	0.747961	1.80454	0.179164	0.554683		61.668	0.191229	0.363271	0.279553	0.596995	0.8035		64.76	0.386229	0.57823	0.386705	0.534036	0.90297					49.8856	-0.226811	0.312452	0.523634	0.469296	NA		75.9566	-0.17198	0.51493	0.110112	0.740016	1
ENSMUSG00000006310	Zbtb32	5.95977	-0.018903	3.05735	1.76327e-05	0.99665	NA		5.7603	1.06041	1.18067	0.805626	0.369417	0.635507		3.7183	-0.724699	2.06204	0.0793416	0.778192	NA					5.15985	-0.393596	0.909156	0.187641	0.664887	NA		8.8929	0.691758	1.00887	0.467521	0.49413	1
ENSMUSG00000006313	Upk1a	3.21699	-0.266965	4.44441	0.0013866	0.970296	NA		21.5968	-6.59282	1.97571	7.08239	0.0077845	0.0639501		40.8129	5.25359	2.4553	2.55712	0.109798	0.557422					0.944694	1.51363	1.91436	0.503126	0.47813	NA		31.4602	-6.09452	2.65975	3.29615	0.0694424	1
ENSMUSG00000006315	Tmem147	196.216	0.905566	0.478816	3.43612	0.0637853	0.351409		176.988	0.271413	0.376736	0.507449	0.476245	0.720979		191.828	0.203195	0.440751	0.217121	0.641242	0.931159					166.897	0.12626	0.286593	0.193203	0.660264	0.915094		228.886	0.141755	0.341759	0.173918	0.676653	1
ENSMUSG00000006333	Rps9	17984.3	-1.41785	0.532153	8.41592	0.00371949	0.0751047		21873.5	-0.705478	0.331161	4.50088	0.0338774	0.165988		30348.7	-7.17248e-05	0.519515	4.54237e-08	0.99983	1					15392.8	8.88304e-05	0.167454	3.31185e-07	0.999541	0.999965		37194.4	0.601043	0.402722	2.31905	0.127798	1
ENSMUSG00000006335	Tfpt	6.42772	-1.28887	1.8751	0.601447	0.438027	NA		6.49824	-0.82481	0.74817	1.20097	0.273128	0.546293		9.8962	0.110779	0.972098	0.014878	0.902918	0.98671					3.4328	-0.282581	0.642666	0.199639	0.655012	NA		11.1213	-0.306626	0.822206	0.137454	0.710825	1
ENSMUSG00000006342	Susd2	15.3207	-1.85033	1.26489	2.16956	0.140766	0.502461		8.00163	-0.0618982	1.05088	0.0032854	0.954292	0.984294		17.5404	-1.19524	0.845652	2.19669	0.138307	0.609642					8.89843	0.71263	0.89083	0.548231	0.459042	NA		13.9275	0.358861	0.877898	0.17051	0.679659	1
ENSMUSG00000006344	Ggt5	35.3481	-1.13679	0.915179	1.6286	0.201897	0.579578		27.6489	0.649619	0.522198	1.52941	0.216201	0.482941		41.5575	-0.832087	0.534714	2.78092	0.0953932	0.524348					44.7584	0.991378	0.524128	3.21915	0.0727812	NA		32.5476	-0.769219	0.681357	1.20185	0.272952	1
ENSMUSG00000006345	Ggt1	6.76256	1.2111	2.53215	0.288504	0.591181	NA		5.3731	0.557791	0.884056	0.382222	0.536417	0.762709		6.11197	0.217126	1.25989	0.0340574	0.853585	0.976288					7.98075	1.03883	0.768033	1.73742	0.187466	NA		10.3673	0.807434	0.912239	0.807075	0.368986	1
ENSMUSG00000006356	Crip2	149.302	2.26625	0.641595	10.0398	0.00153196	0.0433332		268.153	1.67799	0.374269	19.7746	8.7132e-06	0.000353461		98.5341	0.669306	0.48167	1.89079	0.169113	0.650438	C				290.849	-0.419737	0.266205	2.54304	0.110781	0.527989		143.821	-0.102526	0.373185	0.0748539	0.784396	1
ENSMUSG00000006360	Crip1	999.662	0.0387731	0.473903	0.00616495	0.937417	0.985087		890.374	-0.391855	0.269685	2.07617	0.149615	0.395412		1173.76	0.0493097	0.40511	0.0156115	0.900566	0.98601					722.916	0.134959	0.195356	0.467779	0.494011	0.845184		1562.99	0.486681	0.288077	2.95069	0.0858407	1
ENSMUSG00000006362	Cbfa2t3	288.965	0.437362	0.50919	0.713464	0.398296	0.756174		455.694	0.710117	0.288406	6.17759	0.0129378	0.09027		319.853	0.113609	0.361074	0.0925124	0.761007	0.962917					366.126	-0.720701	0.200715	13.3409	0.000259679	0.0492029		388.395	0.428276	0.338293	1.65065	0.198871	1
ENSMUSG00000006369	Fbln1	8.76636	1.16506	2.75845	0.0578108	0.80999	0.948128		6.23919	-2.33971	1.16263	3.66544	0.055552	0.222863		10.1257	1.87617	1.74252	0.935885	0.333338	0.793108					5.26112	1.39661	0.798742	2.89285	0.0889736	NA		9.56217	-0.294703	1.27209	0.0478651	0.826821	1
ENSMUSG00000006373	Pgrmc1	60.308	-0.442264	0.821028	0.25187	0.615761	0.870672		74.3525	-0.292977	0.443259	0.433179	0.510433	0.744178		91.6996	0.325529	0.543578	0.352802	0.552531	0.908846					60.3356	0.125817	0.315272	0.160414	0.688776	NA		113.989	0.679221	0.467464	2.19112	0.138808	1
ENSMUSG00000006378	Gcat	16.0595	-2.30482	1.68139	1.83482	0.175559	0.550867		9.03729	-0.429717	0.920318	0.201294	0.653678	0.83559		13.887	-0.435505	1.2052	0.160862	0.688364	0.943022					10.6663	0.829178	0.768182	0.986911	0.320499	NA		11.6295	0.0580511	0.902867	0.00412214	0.948808	1
ENSMUSG00000006389	Mpl	713.166	-1.94353	0.549211	14.8532	0.000116213	0.00776597		855.848	-1.12852	0.361945	9.55322	0.00199599	0.0252364		1434.93	-0.134895	0.461324	0.0742369	0.785265	0.969379	C				478.725	-0.0209513	0.264397	0.0063627	0.936423	0.986902		1489.04	0.190239	0.329785	0.337023	0.561552	1
ENSMUSG00000006390	Elovl1	201.674	0.0979197	0.470145	0.0439557	0.833936	0.957578		463.589	0.185146	0.563314	0.10477	0.746178	0.884566		457.42	1.47763	0.615784	5.64173	0.0175379	0.244714					291.905	-0.392844	0.33934	1.28064	0.257779	0.697173		620.992	0.564475	0.589493	0.95175	0.329274	1
ENSMUSG00000006392	Med8	161.538	-0.0822853	0.648849	0.0178724	0.89365	0.97432		209.571	0.456256	0.375102	1.46283	0.22648	0.495686		229.013	0.347373	0.423244	0.705813	0.400837	0.838131					168.406	0.0313962	0.281786	0.0122476	0.911879	0.978511		300.712	0.804793	0.394199	4.38165	0.0363278	1
ENSMUSG00000006395	Hyi	8.54164	7.14832	2.64566	5.9205	0.0149657	0.165257		11.5185	-0.301424	0.631327	0.228295	0.632791	0.824251		12.5229	4.24908	1.22621	8.58011	0.00339854	0.106359					9.54065	0.381071	0.542342	0.454081	0.500403	NA		19.253	-0.377928	0.592712	0.398981	0.527616	1
ENSMUSG00000006411	Nectin4	6.23527	4.20644	3.06911	1.06103	0.30298	NA		20.8062	-0.73691	0.841234	0.710212	0.399373	0.661824		21.9711	4.31091	1.21857	11.1353	0.000847013	0.0467784	F				12.0555	-0.229905	0.744622	0.0940154	0.759133	NA		23.7773	-0.397663	0.907927	0.186752	0.665634	1
ENSMUSG00000006412	Pfdn2	89.3922	-1.96226	0.716734	8.19947	0.00419027	0.0806974		76.0548	-0.212794	0.294186	0.514364	0.473256	0.719678		117.139	-0.682919	0.393652	3.43127	0.0639728	0.44573					52.0811	-0.127965	0.235285	0.28483	0.593553	NA		100.907	-0.358758	0.329597	1.15386	0.282743	1
ENSMUSG00000006418	Rnf114	1831.83	-0.478423	0.415965	1.45155	0.22828	0.609868		2205.49	-0.0607492	0.311766	0.0386357	0.844172	0.933233		2395.49	-0.333679	0.433387	0.5541	0.456647	0.864894					2089.34	0.0960616	0.216295	0.198549	0.655895	0.915094		2572.81	0.0233779	0.401177	0.00339778	0.953517	1
ENSMUSG00000006423	C330007P06Rik	102.656	-1.29691	0.854588	2.89258	0.0889883	0.40758		110.345	-0.423305	0.25913	2.62078	0.105472	0.324068		145.216	-0.447731	0.474854	0.998307	0.317721	0.783874					100.659	0.221267	0.214079	1.03883	0.308094	NA		127.79	-0.188287	0.338456	0.305756	0.580297	1
ENSMUSG00000006435	Neurl1a	57.4966	-0.394251	0.86101	0.216574	0.641663	0.88001		79.4848	0.308189	0.526723	0.348464	0.554984	0.774375		78.488	-0.505209	0.740564	0.362657	0.547034	0.90711					68.3707	-0.409623	0.313498	1.74624	0.18635	NA		87.0392	0.339618	0.536585	0.405923	0.524046	1
ENSMUSG00000006442	Srm	66.6245	-1.2613	0.76932	3.08629	0.0789548	0.38875		44.0387	0.248967	0.436863	0.317944	0.572846	0.785223		56.9009	-1.02139	0.556119	4.14568	0.041741	0.369245					36.6459	-0.256419	0.339059	0.585384	0.44421	NA		59.9839	0.0682266	0.367668	0.0346333	0.852366	1
ENSMUSG00000006445	Epha2	6.70477	-3.08988	3.07828	1.50456	0.219971	NA		6.80919	-3.52572	1.06157	9.60672	0.00193867	0.0246414		11.6235	0.777264	1.32561	0.348976	0.554693	0.908846	B				3.1738	-0.222494	1.02184	0.0147144	0.903451	NA		8.62668	-0.412616	0.882235	0.197733	0.656557	1
ENSMUSG00000006456	Rbm14	262.835	1.55473	0.585932	5.49641	0.0190555	0.189919		677.126	2.19654	0.334402	41.7967	1.01273e-10	1.71581e-08		217.545	0.322263	0.526088	0.317256	0.573261	0.915914	B				670.166	-0.734195	0.240956	9.54351	0.00200658	0.129576		245.318	-0.287676	0.402288	0.4997	0.479632	1
ENSMUSG00000006457	Actn3	3.93052	0.487362	4.08873	0.00324066	0.954603	NA		2.54494	-1.66999	1.48655	1.13067	0.287633	NA		3.74953	0.64099	1.98051	0.0894837	0.764835	NA					2.76022	0.364342	0.949104	0.120524	0.728467	NA		2.46433	-2.50738	1.63627	2.26356	0.13245	1
ENSMUSG00000006462	A530013C23Rik	1.63815	5.36596	4.23803	1.57321	0.209741	NA		4.08356	-1.46014	1.25425	1.27186	0.259418	0.53138		5.92292	5.2978	2.12444	4.92698	0.0264406	0.295291					7.3481	2.36454	0.901741	5.85692	0.015516	NA		4.88175	-2.2572	1.57316	1.76819	0.183606	1
ENSMUSG00000006463	Zdhhc24	7.13984	1.07085	2.9584	0.0438275	0.834175	NA		12.3322	-0.238974	0.648588	0.137388	0.710892	0.86726		11.7695	2.12016	1.23608	2.24351	0.134176	0.604648					11.5547	0.392172	0.526853	0.545998	0.459958	NA		13.4247	-0.496171	0.662736	0.543873	0.460832	1
ENSMUSG00000006464	Bbs1	3.22594	4.21652	3.1295	1.04144	0.307488	NA		7.7509	-0.876597	0.861914	1.00744	0.315517	0.587125		6.68941	3.01062	1.60935	1.80249	0.179412	0.663012					7.10922	0.292784	0.616652	0.207029	0.649106	NA		7.48763	-0.44195	1.02365	0.174879	0.675812	1
ENSMUSG00000006471	Ndor1	13.4131	0.921504	1.77967	0.31406	0.5752	0.853862		7.31267	-0.791005	0.864257	0.863712	0.352702	0.61987		9.66348	0.48063	1.14678	0.188254	0.664374	0.936192					8.16008	1.09131	0.560494	3.31723	0.0685571	NA		11.3998	-0.651184	0.948673	0.452035	0.50137	1
ENSMUSG00000006476	Nsmf	6.87257	4.65966	2.47571	1.93562	0.164145	NA		10.8936	-1.22416	0.818167	1.93488	0.164225	0.414837		13.5861	4.15723	1.17391	12.4975	0.000407492	0.0303636	F				9.382	1.29106	0.724723	2.92616	0.0871546	NA		14.983	-1.55474	0.789694	3.55052	0.0595269	1
ENSMUSG00000006494	Pdk1	217.178	-1.12011	0.502024	5.61258	0.017832	0.184194		173.986	-0.946029	0.318402	8.6318	0.00330345	0.0357423		304.956	-0.51722	0.351649	2.14009	0.143493	0.61629	B				117.965	0.1256	0.22445	0.314108	0.57517	0.886882		314.76	-0.0711307	0.277479	0.0654404	0.798095	1
ENSMUSG00000006517	Mvd	173.59	0.602505	0.724961	0.554308	0.456563	0.790053		208.936	0.551298	0.486894	1.22287	0.268798	0.541294		186.073	0.618661	0.680613	0.849715	0.356633	0.811764					190.201	0.108449	0.277465	0.146238	0.702157	0.927166		242.524	0.439652	0.52614	0.720234	0.396067	1
ENSMUSG00000006519	Cyba	1815.36	-0.652278	0.500406	1.96954	0.160496	0.530164		1674.28	0.195941	0.235709	0.703121	0.401737	0.663693		2014.04	-0.637319	0.314036	4.45691	0.0347603	0.336551					1600.62	0.175553	0.209514	0.698741	0.403207	0.804367		2201.53	0.169374	0.24177	0.496305	0.481128	1
ENSMUSG00000006526	Stimate	43.7898	1.43857	0.806026	3.02873	0.0818019	0.393905		37.0864	-0.167665	0.538	0.0950299	0.757878	0.889942		40.6837	0.520675	0.660964	0.685907	0.40756	0.84135					27.2523	-0.439869	0.389037	1.2695	0.259861	NA		45.5277	-0.359021	0.581829	0.373441	0.541135	1
ENSMUSG00000006527	Sfmbt1	50.956	-0.447254	0.821696	0.285824	0.592909	0.860835		55.0447	-0.0595417	0.343875	0.0296183	0.863359	0.941311		60.8028	-0.387208	0.486561	0.652884	0.419083	0.846433					52.5768	0.039272	0.261127	0.0211394	0.8844	NA		59.5116	-0.229695	0.399573	0.324388	0.568983	1
ENSMUSG00000006574	Slc4a1	31255.6	1.34834	0.530766	4.99479	0.0254238	0.22092		59045.6	1.59685	0.344119	21.5432	3.45947e-06	0.000167181		27413.9	-0.00125845	0.549543	3.51454e-06	0.998504	1	B				70012.5	-0.308908	0.289986	1.12128	0.289643	0.730383		32741.9	-0.365796	0.426301	0.714617	0.397915	1
ENSMUSG00000006575	Rundc3a	66.7971	3.23785	1.73335	1.46999	0.225347	0.606729		89.0671	1.70611	0.385871	19.5493	9.80382e-06	0.000387232		36.5538	0.53281	1.06567	0.158048	0.69096	0.94382	B				102.49	-0.159702	0.284805	0.320734	0.571167	NA		60.765	0.0182057	0.483478	0.00141192	0.970026	1
ENSMUSG00000006585	Cdt1	145.778	-0.370682	0.714123	0.314992	0.574633	0.853832		147.425	-0.187112	0.291149	0.404082	0.524989	0.754132		185.199	0.0369723	0.430554	0.00817991	0.927935	0.991872					107.803	-0.111857	0.203666	0.302371	0.5824	NA		208.719	-0.430751	0.354257	1.43181	0.231469	1
ENSMUSG00000006586	Runx1t1	73.6955	1.56454	0.977115	1.82085	0.177212	0.551993		105.512	-0.842582	0.502697	2.76723	0.0962125	0.305121		129.162	1.22787	0.769271	1.44787	0.228869	0.717661					54.9875	-1.14239	0.426917	6.69625	0.00966161	NA		120.4	0.236664	0.500682	0.224443	0.635675	1
ENSMUSG00000006587	Snai3	6.60158	-1.8423	1.93488	1.02537	0.31125	NA		4.68556	-0.585417	1.12976	0.297599	0.585391	0.794479		8.90701	-1.61821	1.24906	1.13497	0.286717	0.762364					2.84824	-0.19108	0.875845	0.0457948	0.830549	NA		7.13541	-1.63181	1.38778	1.16197	0.281057	1
ENSMUSG00000006589	Aprt	297.813	1.03045	0.515168	3.73962	0.0531366	0.317599		279.909	-0.330783	0.326876	1.02596	0.311109	0.583067		283.013	0.381039	0.369016	1.05406	0.304574	0.774273					295.053	0.437565	0.224838	3.64016	0.0564016	0.417584		432.103	0.0751781	0.270229	0.0778626	0.780215	1
ENSMUSG00000006599	Gtf2h1	69.8071	0.120684	0.848354	0.0162819	0.898465	0.975216		63.8963	0.109109	0.363018	0.0888636	0.765627	0.894796		69.1937	-0.240276	0.506593	0.223	0.636764	0.930381					70.2499	0.375443	0.238797	2.45946	0.116819	NA		95.4846	0.193334	0.347224	0.312518	0.576139	1
ENSMUSG00000006611	Hfe	221.001	-0.0685702	0.587756	0.0130159	0.909169	0.977617		196	0.658067	0.375921	3.04375	0.0810485	0.277174		185.049	-0.440438	0.448437	1.04997	0.305515	0.775551					210.264	0.142671	0.316635	0.189444	0.663379	0.915094		180.183	-0.299791	0.366136	0.654144	0.418635	1
ENSMUSG00000006641	Slc5a6	21.1334	1.19056	2.11832	0.128924	0.71955	0.911475		17.7697	-0.985674	0.778965	1.36189	0.24321	0.514162		26.4145	1.69616	1.26285	1.31838	0.250883	0.732712					11.9378	0.880909	0.600911	1.94307	0.163336	NA		28.5623	-0.565478	0.777712	0.507876	0.47606	1
ENSMUSG00000006673	Qrich1	73.9321	0.0605398	0.741767	0.00631153	0.936679	0.985087		73.4738	-0.101592	0.345783	0.0853079	0.770229	0.8978		90.0423	0.007304	0.493191	0.000220926	0.988141	0.998692					67.9403	0.321555	0.252774	1.57499	0.209484	NA		93.6999	-0.1625	0.397708	0.165942	0.683744	1
ENSMUSG00000006675	P4htm	4.08967	2.17928	4.99646	0.0424397	0.836784	NA		1.91455	-2.9024	1.88571	2.64159	0.104099	NA		3.96636	-3.31166	2.13157	1.58968	0.207372	NA				P4HTM	1.46932	1.3634	1.49991	0.210443	0.64642	NA		3.46867	-0.655716	1.66771	0.149173	0.699327	1
ENSMUSG00000006676	Usp19	762.296	0.818192	0.378988	4.36634	0.0366556	0.266142		1303.06	1.31424	0.259919	25.9589	3.48755e-07	2.29334e-05		734.521	-0.130895	0.365986	0.114648	0.734914	0.955571	B				1267.14	-0.534513	0.242132	5.02624	0.0249661	0.325397		878.098	-0.0663955	0.355992	0.0346171	0.8524	1
ENSMUSG00000006678	Pola1	364.239	1.50934	2.68073	0.128184	0.720322	0.911689		313.256	0.457338	0.547955	0.711158	0.39906	0.661628		291.306	-0.711857	1.66897	0.102045	0.749389	0.958379					342.364	0.115356	0.373632	0.0937271	0.759491	0.944997		330.643	0.973002	0.984085	1.00889	0.315168	1
ENSMUSG00000006699	Cdc42	3534.3	-0.0984543	0.376179	0.0693548	0.792278	0.942164		3770.42	0.0355758	0.253486	0.019682	0.888429	0.953004		4180.48	-0.209078	0.272988	0.577922	0.447128	0.858891					3382.47	0.0141395	0.153374	0.00853551	0.92639	0.983112		4592.99	-0.151597	0.215175	0.490196	0.48384	1
ENSMUSG00000006705	Pknox1	100.25	-0.512597	0.601965	0.772115	0.379564	0.741181		123.172	0.679004	0.335455	4.06501	0.0437805	0.194244		125.006	-0.341769	0.360697	0.9282	0.335331	0.794445					96.6571	-0.537839	0.272648	3.83943	0.0500606	NA		132.156	-0.387657	0.301629	1.61327	0.204033	1
ENSMUSG00000006715	Gmnn	21.5462	4.07518	1.90961	2.35995	0.124486	0.47797		23.8561	0.291409	0.371007	0.622539	0.430105	0.686158		20.4516	1.37393	1.00672	1.24049	0.265377	0.74421					17.4007	-0.83444	0.370133	4.97444	0.0257245	NA		26.6414	0.103152	0.50291	0.0425548	0.836566	1
ENSMUSG00000006717	Acot13	80.0998	-0.0284554	0.86446	0.00117342	0.972674	0.993218		95.1804	-1.00064	0.349891	7.80762	0.00520264	0.0488501		137.501	0.804119	0.584857	1.93969	0.163702	0.646158	B				71.9644	0.635769	0.300794	3.98471	0.0459151	NA		175.785	0.624952	0.436548	2.13707	0.143777	1
ENSMUSG00000006728	Cdk4	42.3015	0.689762	0.957935	0.402962	0.525564	0.828771		42.3848	-0.311342	0.374505	0.68009	0.409556	0.670153		52.1716	0.677025	0.544665	1.41015	0.235032	0.721785					37.3318	0.42558	0.30726	1.92758	0.165023	NA		66.7158	-0.196572	0.395005	0.245099	0.620547	1
ENSMUSG00000006731	B4galnt1	21.335	-1.19302	1.13391	1.32397	0.249881	0.627348		21.2391	-0.622505	0.465402	1.76497	0.184005	0.441717		23.1778	-0.383368	0.749404	0.314923	0.574675	0.915976					16.252	-0.286437	0.395621	0.497694	0.480515	NA		25.1078	-0.615217	0.566772	1.14489	0.284622	1
ENSMUSG00000006732	Mettl1	20.8239	0.639217	1.28023	0.268505	0.604336	0.865201		22.661	0.382752	0.601879	0.38479	0.535051	0.761616		25.9782	0.313576	0.778532	0.164241	0.685281	0.942172					16.9892	-0.403748	0.504783	0.618323	0.431671	NA		28.103	0.349416	0.551749	0.410912	0.521507	1
ENSMUSG00000006740	Kif5b	849.067	0.621511	0.670393	0.653024	0.419034	0.769385		953.307	0.171383	0.260157	0.432636	0.510699	0.74431		1031.16	0.080954	0.506391	0.020798	0.885331	0.982979		ENSMUSG00000006740			834.766	-0.1861	0.179682	1.06943	0.301075	0.737018		1131.29	0.0819072	0.328249	0.0624102	0.802726	1
ENSMUSG00000006763	Saal1	30.9797	0.298049	1.02976	0.0877167	0.7671	0.930159		22.7789	0.683748	0.482678	2.00809	0.156463	0.405036		25.0599	-0.532036	0.555561	0.981878	0.321736	0.785677					17.5037	-0.221625	0.472427	0.215382	0.642581	NA		29.2798	0.389018	0.468429	0.70509	0.401079	1
ENSMUSG00000006777	Krt23	48.0979	-0.302149	1.38966	0.172333	0.678047	0.895068		64.2533	-1.77031	1.22236	1.79125	0.180774	0.437668		72.7682	3.51876	1.59049	4.04761	0.0442338	0.377771					29.2551	-0.875269	0.954112	0.794325	0.372795	NA		80.2088	0.0478567	0.724405	0.00437355	0.947272	1
ENSMUSG00000006782	Cnp	1115.88	-0.548855	0.51532	1.29336	0.25543	0.632574		1184.64	-1.09936	0.187679	33.0935	8.78311e-09	9.58224e-07		1705.05	0.0642496	0.354374	0.0324064	0.857139	0.977891	B				766.402	-0.0482883	0.162996	0.0881042	0.766601	0.947044		1817.11	-0.259906	0.245724	1.0961	0.295125	1
ENSMUSG00000006784	Ttc25	2.45845	5.33471	5.22908	0.626378	0.428687	NA		3.23954	0.202016	1.25027	0.0252932	0.873639	NA		1.96507	3.99125	2.46337	2.42948	0.119072	NA					2.54327	-0.733331	1.06849	0.450465	0.502114	NA		3.83926	0.578798	1.50973	0.148671	0.699808	1
ENSMUSG00000006800	Sulf2	58.6612	0.937332	0.84506	1.25189	0.263192	0.642483		63.527	-1.02946	0.345013	8.66758	0.00323921	0.0352721		79.4197	0.91637	0.473309	3.56595	0.0589759	0.432333	B				42.7176	0.0140619	0.384066	0.00136454	0.970533	NA		97.0087	-0.21856	0.3762	0.333543	0.56358	1
ENSMUSG00000006818	Sod2	1740.42	0.126821	0.387982	0.105606	0.745203	0.922359		2463.35	0.0727847	0.284624	0.0668513	0.795978	0.911684		2145.4	0.0602905	0.326599	0.0314506	0.859239	0.97872					2262.18	-0.146281	0.201892	0.531809	0.465847	0.832818		2603.28	0.076985	0.308535	0.0625874	0.802452	1
ENSMUSG00000006850	Tmco6	6.08428	8.09752	2.95785	5.53992	0.0185874	NA		6.74469	1.91123	1.16149	2.56935	0.108953	0.329974		4.3806	4.39635	2.30534	2.77282	0.0958769	0.525179					7.88237	-0.136385	0.710207	0.0314015	0.859348	NA		4.397	-1.97703	1.82706	1.07601	0.299592	1
ENSMUSG00000006906	Stambp	52.8178	1.00994	0.763789	1.62161	0.202868	0.581136		77.2091	0.149291	0.317903	0.221075	0.638222	0.827111		63.6796	0.661917	0.415486	2.46394	0.116486	0.5715					68.3408	-0.207237	0.215765	0.916254	0.33846	NA		71.2349	-0.251488	0.355066	0.497243	0.480714	1
ENSMUSG00000006920	Ezh1	203.12	0.621418	0.604288	0.882654	0.347476	0.716078		232.362	0.285188	0.231674	1.50417	0.220031	0.487636		232.004	0.137344	0.358103	0.136604	0.711681	0.951116					215.666	-0.0994112	0.182906	0.29642	0.586135	0.895432		266.928	-0.172514	0.269649	0.404004	0.525029	1
ENSMUSG00000006931	P3h4	3.24213	-1.89321	4.82502	0.263642	0.607629	NA		2.81736	-1.95234	1.55667	1.44516	0.229306	NA		5.07345	0.512411	1.86572	0.0446858	0.832583	0.973973					3.17131	1.41331	1.51831	0.904819	0.341493	NA		7.18091	-0.0591749	1.49899	0.00155723	0.968522	1
ENSMUSG00000006932	Ctnnb1	52.8535	1.77965	1.06947	1.82662	0.176527	0.551821		50.1498	1.99789	0.598106	10.6708	0.00108837	0.016259		38.073	-0.644677	0.960128	0.440384	0.506937	0.893223	B	ENSMUSG00000006932			54.2128	-0.37368	0.346352	1.19313	0.274699	NA		35.9097	0.699249	0.705987	1.00736	0.315536	1
ENSMUSG00000006941	Eif1b	390.709	-0.527637	0.536204	1.0774	0.29928	0.673395		450.301	-0.178324	0.176334	1.01391	0.313967	0.585526		467.919	-0.202468	0.31503	0.45438	0.500262	0.889229					402.91	-0.00956707	0.174432	0.00295615	0.95664	0.987781		509.887	-0.194801	0.218143	0.786974	0.375017	1
ENSMUSG00000006998	Psmd2	453.747	1.5948	0.47642	9.57578	0.00197161	0.0505822		670.742	1.50597	0.239614	38.6863	4.97694e-10	7.46592e-08		375.11	0.277591	0.258826	1.10475	0.293225	0.766148	B	ENSMUSG00000006998			771.918	-0.160401	0.295045	0.283347	0.594516	0.89739		462.882	0.209827	0.262386	0.648986	0.420475	1
ENSMUSG00000007029	Vars	311.337	-1.02628	0.592542	3.53911	0.0599377	0.339388		286.823	-0.532526	0.301991	3.09198	0.078679	0.271781		422.789	-0.125711	0.478015	0.0779515	0.780093	0.968383					170.787	-0.267791	0.227927	1.40885	0.235248	0.677655		424.973	-0.273993	0.3453	0.617527	0.431968	1
ENSMUSG00000007034	Slc44a4	19.2043	-3.54259	1.29545	9.2082	0.00240933	0.0573224		27.5409	-2.17901	1.01011	3.55637	0.0593173	0.231988		34.1232	0.758544	1.27159	0.305982	0.580156	0.916888					11.6779	-1.66316	0.842523	3.73851	0.0531717	NA		25.6192	-0.361065	0.90687	0.128249	0.720255	1
ENSMUSG00000007035	Msh5	16.2467	0.02929	1.66732	0.000333513	0.98543	0.997325		20.8976	1.29789	0.64544	4.02356	0.0448689	0.196766		16.352	-0.813955	0.965635	0.683803	0.40828	0.84135					20.6729	-0.707283	0.55252	1.47078	0.225223	NA		13.5339	-0.464937	0.686187	0.441981	0.506168	1
ENSMUSG00000007036	Abhd16a	462.825	-0.122582	0.532627	0.0535396	0.817015	0.95129		669.18	0.010885	0.30374	0.00130729	0.971158	0.990835		592.282	0.298582	0.399481	0.540776	0.462111	0.868528					581.668	-0.215131	0.187649	1.3294	0.248911	0.694034		620.028	-0.675205	0.333439	3.87051	0.0491415	1
ENSMUSG00000007038	Neu1	127.715	0.0282104	0.585364	0.00220439	0.962552	0.991352		154.364	-0.135974	0.293142	0.208745	0.647753	0.831621		155.983	0.357727	0.472947	0.631583	0.426775	0.850157					144.63	0.132477	0.280334	0.21261	0.644729	0.913821		200.694	-0.222818	0.35913	0.379734	0.537746	1
ENSMUSG00000007039	Ddah2	36.5187	-0.777651	1.10663	0.613796	0.433362	0.776488		43.6266	-0.701429	0.452867	2.28791	0.130385	0.365662		63.1372	0.392256	0.656538	0.406036	0.523988	0.901097					21.6022	-0.7166	0.34782	4.37111	0.0365531	NA		67.9762	0.195415	0.44082	0.199697	0.654965	1
ENSMUSG00000007041	Clic1	761.294	-0.680008	0.472427	2.34514	0.125674	0.478727		997.556	-0.0621603	0.300526	0.0421856	0.837266	0.929858		1305.17	0.286306	0.478328	0.369541	0.543255	0.906553					755.274	0.292054	0.23768	1.39584	0.237422	0.681545		1557.44	0.439736	0.421744	1.12047	0.289818	1
ENSMUSG00000007050	Lsm2	52.805	-0.0821544	0.955387	0.00830557	0.927385	0.982487		64.1235	-0.0241024	0.322822	0.00563188	0.940178	0.977864		76.8476	0.299058	0.441116	0.456068	0.499467	0.888754					55.6088	0.401059	0.314567	1.59337	0.206846	NA		89.7161	-0.138375	0.336699	0.167873	0.682009	1
ENSMUSG00000007080	Pole	12.1594	-4.16947	2.9249	0.623889	0.429606	0.775185		12.558	0.655613	0.642328	1.04714	0.306167	0.57839		15.9787	-1.57175	1.22336	1.20038	0.273245	0.752315					11.0101	-0.431723	0.487128	0.776385	0.378249	NA		11.3675	0.637284	0.842288	0.579891	0.446355	1
ENSMUSG00000007097	Atp1a2	14.7343	1.24537	1.93463	0.174845	0.675841	0.894272		7.67974	-2.37945	1.12766	4.04957	0.0441827	0.195057		12.4186	1.60093	1.49896	0.9102	0.340061	0.799888					3.81874	0.997659	0.76183	1.58696	0.207761	NA		11.6676	-0.774216	1.07475	0.481094	0.487927	1
ENSMUSG00000007207	Stx1a	5.7656	-6.73188	2.77806	4.71533	0.0298949	NA		3.96703	-2.19502	1.62362	1.72669	0.188834	0.448376		7.19846	-1.53453	1.49105	1.39229	0.238019	0.723745					3.5195	0.6105	1.19747	0.202438	0.65276	NA		5.6243	-0.0237901	1.1908	0.000400563	0.984032	1
ENSMUSG00000007216	Zfp775	39.1315	1.60734	1.14897	1.97734	0.15967	0.529577		41.7853	-0.357241	0.470437	0.560003	0.454259	0.705084		50.9817	1.41187	0.621725	5.01277	0.025161	0.286975					27.3911	0.0369421	0.37136	0.00989719	0.920754	NA		64.4878	-0.530928	0.424271	1.51857	0.217835	1
ENSMUSG00000007338	Mrpl49	53.4143	-0.21621	0.786722	0.0799828	0.777321	0.93428		66.7629	-0.60872	0.358898	2.82899	0.0925764	0.298992		76.6255	0.855383	0.51626	2.90089	0.0885307	0.51032					45.9449	-0.0939174	0.282408	0.109767	0.740409	NA		93.0323	-0.411444	0.340104	1.42737	0.232195	1
ENSMUSG00000007379	Dennd2c	83.7039	-0.0399918	0.754223	0.0027528	0.958156	0.990613		107.917	0.61369	0.336576	3.38396	0.0658337	0.246478		92.1742	-0.487993	0.435659	1.19824	0.273674	0.752323					98.2248	-0.420384	0.262378	2.61238	0.106033	NA		104.677	0.33879	0.351317	0.943187	0.33146	1
ENSMUSG00000007411	Mark3	518.71	0.871611	0.58529	1.77522	0.182737	0.558198		609.008	0.877628	0.30835	8.19211	0.0042073	0.0420194		537.879	-0.151507	0.443009	0.0977959	0.754491	0.960428	B				568.763	-0.380988	0.254658	2.24483	0.134061	0.564704		569.617	0.584995	0.267434	4.95571	0.0260047	1
ENSMUSG00000007415	Gatad1	2804.25	-1.37784	0.343469	17.4482	2.95237e-05	0.00289273		3341.01	-0.689829	0.269525	6.50246	0.0107725	0.0802148		4438.23	-0.371749	0.348206	1.09219	0.295987	0.769074	A				2666.37	0.0491984	0.15899	0.0957799	0.756954	0.944277		4629.31	0.0485348	0.310606	0.024444	0.87576	1
ENSMUSG00000007458	M6pr	335.665	-0.754449	0.457107	2.87361	0.0900427	0.410254		313.091	-0.737825	0.210356	12.0269	0.000524379	0.00939251		452.772	-0.126266	0.285506	0.209018	0.647538	0.933191	B				259.574	0.337306	0.223478	2.22083	0.13616	0.566212		475.09	-0.00889306	0.219693	0.00163703	0.967726	1
ENSMUSG00000007476	Lrrc8a	68.5566	-0.483829	0.814821	0.410464	0.521734	0.827527		92.4622	-0.405931	0.346364	1.33127	0.24858	0.520017		103.985	0.347985	0.503322	0.506529	0.476645	0.875006					74.2149	0.00336622	0.266002	0.000160736	0.989885	NA		120.998	-0.609873	0.366812	2.64761	0.103706	1
ENSMUSG00000007564	Ppp2r1a	246.344	-0.243801	0.789815	0.111437	0.738514	0.919683		282.97	-0.407799	0.235585	2.95273	0.0857326	0.287258		359.597	0.374863	0.47444	0.665069	0.414776	0.844342					199.069	-0.030179	0.222292	0.0186622	0.891339	0.973376		424.893	-0.233424	0.284743	0.661212	0.416132	1
ENSMUSG00000007570	Fance	43.9592	-0.407444	0.810395	0.242097	0.622695	0.873273		44.2977	-0.432	0.402455	1.15614	0.282268	0.556383		61.1896	0.200764	0.451877	0.202137	0.653002	0.933816					33.3263	0.146562	0.293244	0.250563	0.616679	NA		75.8281	0.0279912	0.310551	0.00814753	0.928078	1
ENSMUSG00000007589	Tinf2	4.59068	0.817622	2.81925	0.0350595	0.851471	NA		4.1975	0.401961	0.885412	0.203966	0.651538	0.834252		4.68132	-0.0386732	1.66066	0.000369169	0.984671	0.998163					5.00973	0.44185	0.640228	0.45899	0.498097	NA		6.67525	-0.689588	0.960341	0.501658	0.478772	1
ENSMUSG00000007603	Dus3l	41.5631	-1.17781	1.39383	0.979601	0.322297	0.694769		35.568	-0.433468	0.476721	0.81723	0.365991	0.63182		50.2482	-0.734438	0.820058	0.941564	0.331876	0.791634					25.1869	-0.371558	0.358493	1.0683	0.301329	NA		53.5064	-0.456233	0.477512	0.890709	0.345285	1
ENSMUSG00000007610	Gtpbp3	26.4499	2.57707	1.74964	1.04249	0.307243	0.680017		27.4601	0.190749	0.588321	0.103272	0.747938	0.885268		25.99	1.37327	0.938805	1.59039	0.207271	0.698964					21.2203	-0.385054	0.514354	0.551895	0.457545	NA		36.7319	-0.0546543	0.468999	0.0135173	0.907443	1
ENSMUSG00000007613	Tgfbr1	120.996	-0.00152133	0.693808	4.56281e-06	0.998296	1		131.376	0.418005	0.325473	1.66326	0.197164	0.45885		125.65	-0.24561	0.400507	0.395032	0.529666	0.901328					138.726	0.162325	0.218634	0.527099	0.467829	0.832872		127.09	-0.643847	0.292523	4.65389	0.0309833	1
ENSMUSG00000007617	Homer1	63.9104	0.495436	0.815636	0.305228	0.580623	0.856366		85.3424	0.754703	0.2969	6.57523	0.0103408	0.0778858		62.2812	-0.272188	0.490557	0.273733	0.600839	0.921928					88.7961	-0.159475	0.250328	0.406972	0.52351	NA		67.8389	-0.330074	0.406934	0.638728	0.424172	1
ENSMUSG00000007646	Rad51c	11.7841	-1.64827	1.41768	1.58777	0.207645	0.585826		17.6286	2.23991	0.691084	9.61692	0.00192792	0.0245699		9.84068	-1.15771	1.18654	1.2342	0.266591	0.745513	B				18.199	-0.571751	0.486717	1.38736	0.238851	NA		7.37903	-2.77216	1.21113	5.26501	0.0217583	1
ENSMUSG00000007655	Cav1	14.7229	-1.40001	1.86755	0.519441	0.47108	0.798675		14.1846	-2.20936	0.967419	4.63389	0.0313465	0.158277		16.6362	-0.26911	1.24367	0.046774	0.828775	0.973226					12.6403	0.74174	0.64643	1.03701	0.308518	NA		16.5492	-0.094621	0.890355	0.0109841	0.91653	1
ENSMUSG00000007656	Arpp19	289.717	0.524793	0.498064	1.02058	0.312382	0.684855		323.941	-0.105004	0.267442	0.152916	0.695764	0.859145		355.55	0.379329	0.366661	1.07839	0.299058	0.77114					296.736	0.164293	0.232856	0.487533	0.48503	0.84121		482.357	0.384054	0.287971	1.82551	0.176659	1
ENSMUSG00000007659	Bcl2l1	32960.2	0.975695	0.401971	5.26683	0.0217356	0.202904		63859.9	1.19244	0.306558	15.4249	8.58504e-05	0.0023109		34003.1	0.295018	0.383607	0.502542	0.478385	0.876428	B				63292.9	-0.421532	0.235527	3.29242	0.0696002	0.451107		38730.3	-0.0729961	0.338494	0.0462496	0.829723	1
ENSMUSG00000007670	Khsrp	89.1232	1.42333	0.68372	4.0123	0.0451696	0.296298		85.1997	0.287317	0.441531	0.41948	0.517197	0.748708		78.88	0.132368	0.622487	0.0414217	0.838726	0.974417					64.1775	-0.528783	0.320685	2.49949	0.113883	NA		85.1857	-0.47146	0.524355	0.780767	0.376907	1
ENSMUSG00000007721	Ccdc124	95.9956	0.619014	0.702974	0.682264	0.408808	0.763487		106.26	0.818289	0.390881	4.43805	0.0351464	0.169795		79.8616	-0.294983	0.596529	0.238634	0.625194	0.9273					105.347	-0.207943	0.240505	0.757539	0.3841	NA		89.0005	0.0374107	0.480068	0.00603569	0.938075	1
ENSMUSG00000007739	Cct4	577.403	0.38974	0.385097	0.976303	0.323113	0.695049		550.265	0.00971232	0.261804	0.00135928	0.97059	0.990643		589.184	0.0909584	0.34402	0.0756185	0.783325	0.96905					537.253	0.171766	0.195325	0.75629	0.384492	0.788707		729.512	-0.0199997	0.272236	0.00539013	0.941474	1
ENSMUSG00000007777	0610009B22Rik	35.4571	-0.456295	0.870458	0.270894	0.602733	0.864525		32.5641	-0.0937847	0.636884	0.0208678	0.88514	0.95234		34.9838	-0.410077	0.753679	0.339447	0.560149	0.910708					30.472	0.197351	0.413409	0.20653	0.6495	NA		40.1297	0.640757	0.60412	1.17002	0.279396	1
ENSMUSG00000007812	Zfp655	121.348	-0.483045	0.639815	0.552095	0.457463	0.790459		128.731	-0.17455	0.245776	0.502241	0.478517	0.722037		155.092	-0.277344	0.32809	0.706559	0.400588	0.838131					104.762	-0.172226	0.209826	0.670037	0.413039	NA		176.578	0.328794	0.297152	1.25174	0.26322	1
ENSMUSG00000007815	Rhoa	10382.1	0.88001	0.334023	6.52184	0.0106558	0.134756		14433.9	0.757316	0.273818	7.71907	0.00546406	0.0505057		11506.3	0.337209	0.287615	1.28833	0.256355	0.736895					13727.5	-0.235395	0.226205	1.08539	0.297495	0.736463		13064.1	-0.15264	0.264497	0.329168	0.56615	1
ENSMUSG00000007817	Zmiz1	182.49	0.21026	0.525749	0.166327	0.683397	0.897087		159.381	0.240961	0.32157	0.553914	0.456723	0.707005		183.461	-0.356628	0.446432	0.662266	0.415761	0.844613					139.117	-0.0751498	0.204113	0.130534	0.717879	0.932214		192.438	-0.292337	0.393178	0.542176	0.461532	1
ENSMUSG00000007827	Ankrd26	23.9497	0.539207	1.14268	0.197879	0.656438	0.887572		24.2284	0.823098	0.53946	2.29773	0.129563	0.364348		24.3404	-0.354415	0.770395	0.195335	0.658513	0.935599					23.245	-0.198401	0.455631	0.177141	0.673842	NA		21.8304	-0.208847	0.732158	0.0789916	0.778669	1
ENSMUSG00000007833	Aldh16a1	83.6088	-0.616143	0.697225	0.865372	0.35224	0.720084		73.105	0.202204	0.287904	0.498587	0.480122	0.723019		85.6559	-0.858557	0.42088	4.47799	0.0343342	0.336142					68.0683	-0.0971884	0.240063	0.155579	0.69326	NA		99.1514	0.252303	0.318651	0.637494	0.42462	1
ENSMUSG00000007836	Hnrnpa0	1611.88	-0.552464	0.480156	1.50821	0.219412	0.601859		1443.62	-0.515957	0.241756	4.47506	0.0343929	0.167536		2028.75	-0.271738	0.339346	0.671897	0.412391	0.843651					1050.1	0.00470365	0.180892	0.000682047	0.979165	0.996762		2172.48	-0.259515	0.279297	0.846234	0.35762	1
ENSMUSG00000007837	Prrg2	65.0934	-0.189964	0.711948	0.0739595	0.785657	0.938811		113.395	-1.18625	0.343652	11.4932	0.000698494	0.011696		156.113	1.16543	0.369979	9.19718	0.00242388	0.088751	B				90.1289	0.803584	0.234254	10.9929	0.000914598	NA		191.992	0.0276126	0.280861	0.00969593	0.921561	1
ENSMUSG00000007850	Hnrnph1	21.0849	0.224908	1.19539	0.0381198	0.845203	0.961771		19.3048	-0.0372783	0.60485	0.00365878	0.951767	0.983172		24.921	-0.109135	0.691687	0.0257283	0.872566	0.981183					17.7154	0.193807	0.453742	0.178136	0.67298	NA		30.9872	0.146758	0.605272	0.0591457	0.807851	1
ENSMUSG00000007867	Ift43	0	NA	NA	NA	NA	NA		2.01961	-0.569836	1.83821	0.0734078	0.786438	NA		2.51459	4.75811	2.68451	2.96353	0.0851619	NA					0.846902	-0.240346	1.86556	0.0295673	0.863476	NA		3.17083	-0.408356	1.73569	0.053789	0.816597	1
ENSMUSG00000007872	Id3	339.724	2.93316	0.64661	17.9092	2.31701e-05	0.00244265		353.367	-0.243715	0.357833	0.442309	0.50601	0.740704		307.303	2.22849	0.460382	21.0027	4.5863e-06	0.00141472	D				306.802	0.212521	0.29367	0.486746	0.485382	0.84121		444.89	-0.594909	0.32893	3.12132	0.0772743	1
ENSMUSG00000007880	Arid1a	354.701	0.17183	0.438764	0.158652	0.690401	0.900083		332.422	0.829745	0.301338	7.48094	0.00623555	0.0551315		342.274	-0.437333	0.368011	1.5743	0.209583	0.699795					285.874	-0.38715	0.263906	2.14372	0.143154	0.582251		384.458	0.0834303	0.280118	0.0892978	0.765072	1
ENSMUSG00000007891	Ctsd	4762.12	0.294976	0.387885	0.548731	0.458837	0.791347		7018.23	0.231595	0.271396	0.738938	0.390001	0.653797		6656.48	0.275508	0.333557	0.596448	0.439937	0.856459					6679.22	0.0132731	0.193452	0.00466344	0.945555	0.987781		8575.9	0.361395	0.252899	2.08924	0.14834	1
ENSMUSG00000007892	Rplp1	32387.6	-1.3503	0.536687	5.97953	0.0144728	0.162673		40453	-2.36781	0.311616	51.3394	7.77016e-13	2.03451e-10		70521.4	0.354307	0.424636	0.612562	0.433825	0.853488	B				23538.9	0.618286	0.305945	3.92677	0.0475232	0.39862		95692.2	0.598179	0.360892	2.83829	0.0920424	1
ENSMUSG00000007950	Abhd8	100.069	-2.43047	0.977697	8.3541	0.00384818	0.0767691		61.715	-0.877617	0.394389	4.79724	0.0285053	0.148411		118.072	-0.743789	0.651782	1.64901	0.199094	0.685533					46.0469	0.280429	0.307227	0.799915	0.371119	NA		91.51	-0.440678	0.452636	0.922309	0.336869	1
ENSMUSG00000007987	Ift22	44.4986	1.28852	1.22158	0.776042	0.378354	0.740066		45.3913	-0.248721	0.484972	0.264741	0.606882	0.809309		52.9997	0.842038	0.603455	1.65843	0.197815	0.684778					30.284	-0.388276	0.430929	0.809677	0.368216	NA		67.7926	0.123564	0.344017	0.129513	0.718938	1
ENSMUSG00000007989	Fzd3	3.41831	0.246239	3.27869	0.00275733	0.958122	NA		4.31992	0.0342219	1.32413	-0.00237099	1	1		5.38431	1.58605	1.73602	0.823677	0.364107	0.817065		ENSMUSG00000007989			3.23442	0.549312	0.964241	0.365955	0.545218	NA		5.51589	-0.0264022	1.7288	0.000231602	0.987858	1
ENSMUSG00000008035	Mid1ip1	390.346	-0.73957	0.702546	1.1981	0.273702	0.649506		555.605	-0.855686	0.319005	6.99109	0.00819164	0.0659407		725.459	0.661012	0.511713	1.66992	0.196269	0.683327					356.755	-0.0523023	0.224384	0.0546526	0.815157	0.95115		689.583	-0.899439	0.389749	4.92277	0.026505	1
ENSMUSG00000008036	Ap2s1	581.404	0.0817874	0.459697	0.0307452	0.86081	0.965006		702.119	-0.0656562	0.27548	0.0565667	0.812007	0.917945		840.011	0.291497	0.309069	0.840887	0.359143	0.813078					562.937	-0.105449	0.253679	0.174017	0.676566	0.922141		921.973	0.195317	0.300207	0.428554	0.512699	1
ENSMUSG00000008090	Fgfrl1	99.9027	-4.96904	1.11114	22.1794	2.48323e-06	0.000433821		85.2324	-7.97797	0.676028	192.999	7.04323e-44	1.26787e-40		234.628	0.0435769	0.459085	0.00782325	0.92952	0.991872	C				1.6456	0.0637458	1.30885	0.00671081	0.934711	NA		279.979	-0.209486	0.412896	0.252954	0.615002	1
ENSMUSG00000008129	4930432K21Rik	3.90241	-0.482725	3.27706	0.00971522	0.921483	NA		3.41785	-2.62218	1.2824	4.11588	0.0424824	0.190471		5.39532	0.921443	1.67555	0.241762	0.622937	0.926673					1.28093	-0.161288	1.25839	-0.0182034	1	NA		8.09361	-0.728137	0.877106	0.681693	0.409004	1
ENSMUSG00000008136	Fhl2	6.97155	-2.01124	3.07589	0.682928	0.40858	NA		5.01524	-1.37673	1.02458	1.79316	0.180542	0.437427		6.75768	-0.0805309	1.46664	-0.00310183	1	1					3.21471	-0.5882	1.21693	0.165862	0.683815	NA		5.49528	0.462369	1.05987	0.195068	0.658731	1
ENSMUSG00000008140	Emc10	473.8	0.395123	0.453278	0.684104	0.408177	0.763283		457.982	-0.209511	0.284875	0.537459	0.463488	0.712118		562.676	0.111177	0.423024	0.0667205	0.796173	0.969772					339.717	-0.310151	0.237529	1.69066	0.193514	0.641791		689.499	-0.0919509	0.330612	0.0768216	0.781652	1
ENSMUSG00000008153	Clstn3	0.397067	2.46133	5.8793	0.270249	0.603165	NA		16.0292	3.2524	2.29087	1.73124	0.188253	0.447586		3.5074	4.46608	2.68108	1.95804	0.161723	NA					12.7565	-0.51761	1.16984	0.179257	0.672013	NA		19.3436	3.70455	2.13685	3.15396	0.075743	1
ENSMUSG00000008167	Fbxw9	36.7501	-0.90189	1.16521	0.77214	0.379556	0.741181		38.1523	-0.121143	0.428009	0.0802615	0.776943	0.902435		49.3221	-0.377485	0.520759	0.551918	0.457535	0.865359					32.3825	0.10036	0.335907	0.0888203	0.765682	NA		43.2689	-0.473727	0.469327	0.986605	0.320573	1
ENSMUSG00000008193	Spib	593.287	-0.329239	0.50112	0.475719	0.490368	0.807848		691.48	-0.755741	0.329325	5.07052	0.0243361	0.133789		956.737	0.602605	0.42591	2.05027	0.152179	0.625637					365.966	-0.273102	0.310989	0.781736	0.376611	0.784253		1053.26	-0.389617	0.353712	1.17629	0.278113	1
ENSMUSG00000008200	Fnbp4	54.9742	-0.8549	0.835936	1.12009	0.2899	0.664889		41.6705	0.788363	0.399387	3.88591	0.0486929	0.206404		52.4895	-1.09627	0.436062	7.15225	0.007487	0.161322					35.1524	-0.35688	0.289859	1.52698	0.216566	NA		46.5146	-0.451531	0.370226	1.46428	0.22625	1
ENSMUSG00000008206	Cers4	387.997	1.84502	2.2977	0.327637	0.567054	0.850337		525.161	-3.51064	0.844149	13.1243	0.000291494	0.00607497		942.6	3.54438	1.43694	4.28536	0.0384419	0.356244	B				105.702	0.661247	0.455375	1.95667	0.16187	NA		757.773	-3.85812	1.03219	9.18475	0.0024404	1
ENSMUSG00000008226	Scrn3	180.3	0.477551	0.74762	0.319037	0.572187	0.853326		297.814	0.93644	0.355041	7.15524	0.00747454	0.0622921		176.564	0.135264	0.504734	0.0666135	0.796333	0.969772					337.587	-0.0447312	0.288373	0.0241637	0.876469	0.968059		246.728	0.625514	0.388847	2.68163	0.101512	1
ENSMUSG00000008301	Phax	158.157	-0.200548	0.555074	0.140947	0.707341	0.906834		164.939	-0.722424	0.246822	8.38221	0.00378911	0.0393514		215.712	0.281975	0.354923	0.656617	0.417757	0.846433	B				138.402	0.440579	0.21081	4.10474	0.0427631	0.379574		270.596	0.00561688	0.248927	0.000509665	0.981989	1
ENSMUSG00000008305	Tle1	34.4508	-1.38986	0.938184	2.5729	0.108708	0.44915		31.0197	-1.4266	0.464696	9.07763	0.00258756	0.030124		63.417	0.0698818	0.42821	0.0277244	0.867758	0.979904	B				12.683	0.462107	0.470058	0.963781	0.326236	NA		68.3092	-0.0245065	0.320045	0.00586742	0.938942	1
ENSMUSG00000008307	1700109H08Rik	3.7832	1.61208	3.01711	0.130766	0.717639	NA		10.4517	0.0495754	0.842225	0.00355133	0.95248	0.983485		7.10139	1.41896	1.29747	0.757195	0.384208	0.830259					9.97938	-0.167405	0.749332	0.0496054	0.823751	NA		8.25441	-0.00267949	0.934862	8.22511e-06	0.997712	1
ENSMUSG00000008318	Relt	92.3051	-0.00768824	0.73696	0.000121135	0.991219	0.998226		106.267	0.515296	0.46012	1.2371	0.266032	0.538911		96.919	-0.11612	0.520062	0.0574629	0.810552	0.972379					126.46	0.444582	0.281425	2.28975	0.13023	0.559705		124.052	0.132174	0.38035	0.121952	0.726927	1
ENSMUSG00000008333	Snrpb2	479.97	-0.574208	0.528145	1.11741	0.290477	0.665213		447.126	-0.379116	0.328762	1.28511	0.256952	0.528519		646.344	-0.0767126	0.44113	0.0317942	0.85848	0.978515				SNRPB2	405.386	0.46584	0.24751	3.43136	0.0639694	0.441107		739.219	0.273245	0.377755	0.532063	0.465741	1
ENSMUSG00000008348	Ubc	2841.86	-0.394648	0.50294	0.693146	0.405096	0.761088		3090.75	-1.15639	0.219261	26.4581	2.69321e-07	1.89195e-05		4771.65	0.401395	0.377191	1.14001	0.285649	0.762038	B				1595.93	-0.268391	0.154755	3.05794	0.0803434	0.475145		5362.41	-0.302489	0.259141	1.33015	0.248779	1
ENSMUSG00000008373	Prpf31	55.302	0.269544	0.760213	0.124108	0.724622	0.912605		57.2374	-0.0631581	0.334204	0.0348698	0.851869	0.936282		68.7689	0.281527	0.443871	0.417835	0.518019	0.899539					55.6758	0.440409	0.269922	2.57391	0.108639	NA		83.9641	0.0341585	0.335919	0.0103883	0.918818	1
ENSMUSG00000008384	Sertad1	138.647	-0.19476	0.547944	0.129823	0.718615	0.911279		168.501	0.515477	0.36193	2.05777	0.151431	0.397439		157.526	-0.169289	0.457974	0.154271	0.694487	0.945909					192.084	0.261502	0.235383	1.20138	0.273046	0.712308		190.489	0.38121	0.35502	1.18403	0.276538	1
ENSMUSG00000008393	Carhsp1	5572.56	2.33435	0.606452	10.3979	0.0012616	0.0387642		8931.94	0.901283	0.364561	6.29933	0.0120784	0.0864946		4399.22	0.687453	0.459774	1.6803	0.194884	0.681538	A				9396.42	-0.2244	0.268888	0.710894	0.399147	0.800586		5979.34	0.427624	0.325891	1.76773	0.183663	1
ENSMUSG00000008398	Elk3	191.28	-0.327075	0.520226	0.38503	0.534924	0.834066		180.265	0.0923811	0.316322	0.0869237	0.768125	0.896595		210.659	-0.558879	0.369291	2.24741	0.133838	0.604031					145.558	-0.293318	0.231337	1.63195	0.201434	0.648186		209.42	-0.12279	0.346219	0.124657	0.724038	1
ENSMUSG00000008429	Herpud2	469.425	-1.74193	0.658117	8.61633	0.00333163	0.0701377		466.79	0.0616085	0.235507	0.0693391	0.792302	0.910189		605.181	-0.972443	0.432062	5.47287	0.0193138	0.255396					435.503	0.129836	0.176604	0.531172	0.466114	0.832818		537.087	0.126053	0.296575	0.182432	0.669291	1
ENSMUSG00000008435	Rdh13	22.7364	7.9043	2.15672	12.9576	0.000318622	0.0161677		18.8197	-0.062602	0.567546	0.0121149	0.912356	0.965413		22.765	4.00273	1.11389	8.5554	0.00344499	0.107035	A				14.2102	-0.250277	0.424621	0.358047	0.549593	NA		22.6338	-0.588414	0.519352	1.24196	0.265094	1
ENSMUSG00000008438	Adam21	8.82205	5.40958	2.44526	2.97463	0.0845795	0.398891		6.41813	2.17595	0.912288	5.55852	0.018391	0.11251		2.34651	-0.00811912	1.79615	1.3312e-05	0.997089	NA					5.69345	-1.06189	0.664284	2.50662	0.113369	NA		2.1136	1.19061	1.29183	0.846405	0.357571	1
ENSMUSG00000008450	Nutf2	9.70046	0.744778	1.69608	0.182722	0.669044	0.892513		17.2887	-0.207209	0.6498	0.103622	0.747526	0.885201		16.7598	0.963281	0.787448	1.28245	0.257444	0.737554					16.4885	0.140452	0.469615	0.0869138	0.768138	NA		21.1412	0.496984	0.54857	0.841825	0.358875	1
ENSMUSG00000008475	Arpc5	2354.36	-0.40676	0.377035	1.23377	0.266675	0.64552		3179.63	0.425943	0.28616	2.24092	0.134401	0.372385		2830.24	-0.356011	0.321254	1.22924	0.267555	0.746726					3368.12	0.104837	0.184419	0.325358	0.568405	0.884895		2975.59	-0.12277	0.267219	0.209101	0.647473	1
ENSMUSG00000008489	Elavl2	1.53241	2.66341	5.15775	0.0144748	0.904237	NA		16.1908	4.34056	0.818698	27.2208	1.81499e-07	1.34039e-05		1.43842	0.73553	2.34765	0.0245098	0.875595	NA	B				20.5311	-0.174352	0.502779	0.117347	0.73193	NA		1.68702	-1.24174	1.88408	0.400698	0.526729	1
ENSMUSG00000008496	Pou2f2	1015.42	0.83516	0.577604	2.23135	0.135236	0.493301		1030.15	0.385354	0.263103	2.12519	0.144895	0.389031		1087.27	0.422365	0.439347	0.965979	0.325685	0.78873					802.784	-0.181297	0.256324	0.506856	0.476503	0.835032		1378.77	0.0617722	0.364877	0.0288211	0.865193	1
ENSMUSG00000008540	Mgst1	159.228	-0.393331	0.883397	0.145445	0.702926	0.904814		193.803	-0.173676	0.456316	0.142499	0.705809	0.864773		242.446	0.420083	0.578567	0.523159	0.469497	0.87256					210.115	0.728317	0.315377	5.13287	0.0234769	0.316703		271.922	0.144409	0.3963	0.134358	0.713956	1
ENSMUSG00000008575	Nfib	34.9988	1.52978	1.15318	1.23426	0.26658	0.64546		61.2932	-0.717062	1.12301	0.374264	0.540689	0.765029		64.9611	2.80108	1.20506	4.73964	0.0294753	0.314907					39.3486	-0.704576	0.583018	1.29003	0.256043	NA		63.5932	-0.818622	1.38981	0.324296	0.569037	1
ENSMUSG00000008601	Rab25	34.9587	0.359915	1.47856	-0.0561536	1	1		47.8648	-1.64215	1.42125	0.695419	0.404327	0.66579		51.2534	3.50157	1.21726	6.96905	0.00829314	0.169598					26.6887	-0.774043	1.12743	0.986555	0.320586	NA		61.8513	0.370345	0.784163	0.243199	0.621905	1
ENSMUSG00000008604	Ubqln4	75.0691	-1.28864	0.945687	2.34241	0.125895	0.479167		68.7817	-0.836848	0.322775	6.60167	0.0101883	0.0770599		97.9226	-0.0231903	0.556993	0.00198887	0.964429	0.996196				UBQLN4	51.2648	0.072323	0.348007	0.0394084	0.842642	NA		99.7352	-0.123959	0.343363	0.129733	0.718709	1
ENSMUSG00000008668	Rps18	4018.44	-0.402397	0.652915	0.310426	0.577419	0.854874		3907.39	-0.473064	0.369776	1.61881	0.203258	0.466057		5208.42	-0.226507	0.539558	0.168513	0.681437	0.941035					3631.92	0.328389	0.22002	2.16293	0.141375	0.578508		6824.51	0.583693	0.397316	2.24018	0.134465	1
ENSMUSG00000008682	Rpl10	1318.87	1.36775	0.529344	5.21242	0.0224261	0.20698		1497.91	-0.531686	0.308086	2.99319	0.0836155	0.282895		1460.67	0.611258	0.436125	1.66382	0.197089	0.684199					1448.88	0.262572	0.221549	1.37689	0.240632	0.684987		2169.62	0.35004	0.321438	1.21358	0.270625	1
ENSMUSG00000008683	Rps15a	10161.7	-2.71491	0.557277	22.6284	1.96555e-06	0.000348359		8315.91	-3.17279	0.388857	55.1298	1.12825e-13	3.29138e-11		20400	-0.111124	0.544571	0.036047	0.849419	0.975166	C				2544.21	0.581954	0.2809	4.17966	0.040912	0.378476		27602	0.892094	0.395277	5.3485	0.0207401	1
ENSMUSG00000008690	Ncaph2	129.622	2.27776	0.708787	7.51317	0.00612495	0.0997364		120.622	-0.461044	0.325996	1.90174	0.167883	0.420567		142.68	1.36924	0.45473	7.88233	0.00499201	0.129709					108.73	0.438117	0.243703	3.05783	0.0803488	NA		179.639	-0.16823	0.330457	0.255637	0.613133	1
ENSMUSG00000008730	Hipk1	19757.5	0.252332	0.322486	0.590646	0.442169	0.780385		28772.2	0.384294	0.258422	2.25023	0.133594	0.371049		22896.1	-0.14777	0.356438	0.157609	0.691367	0.944009					25227.1	-0.437227	0.188844	5.5262	0.0187337	0.300158		23989.5	-0.124398	0.300385	0.16991	0.680192	1
ENSMUSG00000008734	Gprc5b	22.5674	1.53187	1.81589	0.788818	0.374458	0.73728		20.0987	2.64885	0.559248	22.402	2.21142e-06	0.000116654		6.01885	0.199173	1.3509	0.0400977	0.84129	0.974417	B				29.0022	0.320667	0.385167	0.652877	0.419086	NA		5.50134	-0.0479269	1.1012	0.00187981	0.965417	1
ENSMUSG00000008763	Man1a2	387.917	0.652259	0.772444	0.50603	0.476862	0.801478		408.295	0.297722	0.265571	1.27144	0.259496	0.531411		397.661	-0.265729	0.547104	0.190872	0.662192	0.935813					409.685	0.0214921	0.217923	0.00974794	0.921351	0.982075		448.298	0.50521	0.380145	1.80994	0.178516	1
ENSMUSG00000008822	Acyp1	64.7318	-1.06839	0.686991	2.45717	0.116989	0.464864		62.4478	-0.478638	0.424612	1.24848	0.263842	0.536211		79.7622	-0.515741	0.519559	1.11288	0.291457	0.764718					55.5132	0.0891451	0.329877	0.0652368	0.798403	NA		81.3443	0.341559	0.402752	0.735971	0.390955	1
ENSMUSG00000008843	Cldn13	53.3502	1.13435	0.995819	0.917383	0.338163	0.708685		93.8428	1.93828	0.437604	19.4419	1.03706e-05	0.000404736		37.7519	-0.25703	0.785177	0.0933319	0.759983	0.962682	B				127.901	0.0268987	0.393728	0.00429947	0.94772	0.987781		53.9646	0.742559	0.543607	1.92431	0.165382	1
ENSMUSG00000008845	Cd163	1.39467	5.20654	5.79923	0.905847	0.341219	NA		2.20727	-3.99269	1.81041	4.64011	0.031233	NA		3.63897	4.95484	2.42441	3.18325	0.0743967	NA					0.375589	0.0591118	2.78631	0.000167823	0.989664	NA		4.97538	-2.05742	1.38195	2.01737	0.155508	1
ENSMUSG00000008855	Hdac5	265.622	-0.517709	0.521009	0.9711	0.324406	0.695993		333.926	0.537308	0.302355	3.2292	0.0723362	0.259779		318.018	-0.571207	0.445589	1.53811	0.214899	0.703656					327.755	-0.154919	0.170875	0.807576	0.368838	0.779524		319.707	-0.159347	0.344851	0.210407	0.646449	1
ENSMUSG00000008859	Rala	304.949	-0.438363	0.438912	1.03523	0.308934	0.681129		292.319	-0.277854	0.216213	1.64034	0.200278	0.462175		382.746	-0.238653	0.301672	0.642494	0.422809	0.848782					278.836	0.407706	0.172685	5.33875	0.0208565	0.309174		436.669	0.0760893	0.228091	0.111884	0.738009	1
ENSMUSG00000008892	Vdac3	218.371	-0.111376	0.86385	0.0139145	0.9061	0.977406		296.163	-0.814348	0.307292	6.98239	0.00823158	0.0661521		326.545	0.0311906	0.50211	0.00316468	0.955138	0.996196		ENSMUSG00000008892			250.568	0.0575805	0.210422	0.0753303	0.783728	0.94812		415.179	-0.0816103	0.38419	0.0444399	0.833037	1
ENSMUSG00000008932	Slc1a7	0.969259	1.76519	5.68128	0.0658484	0.79748	NA		2.13318	0.302567	2.08794	0.0217532	0.882746	NA		0.291655	0.342416	3.92664	0.0094107	0.922719	NA					3.72239	0.905589	1.2448	0.335507	0.562434	NA		0.229369	-1.14106	3.94121	0.161755	0.687546	1
ENSMUSG00000008958	Vps72	255.163	0.178011	0.63601	0.0857659	0.769631	0.931309		237.608	-0.539248	0.258934	4.27794	0.03861	0.180234		316.361	0.300265	0.417983	0.524005	0.469138	0.87256					169.066	0.0589064	0.197451	0.088629	0.765927	0.947044		331.523	-0.570725	0.277607	4.04853	0.0442098	1
ENSMUSG00000008976	Gabpa	37.3629	0.422276	1.01028	0.184269	0.66773	0.89234		39.8855	-0.182039	0.452445	0.164472	0.685072	0.85349		47.1889	0.254388	0.577669	0.185954	0.666305	0.936548					31.9	-0.135577	0.372499	0.131742	0.716633	NA		60.09	0.130304	0.417821	0.0984319	0.75372	1
ENSMUSG00000009013	Dynll1	1432.57	-0.264763	0.438059	0.343079	0.558057	0.845556		1761.28	0.0369065	0.246906	0.0223648	0.881121	0.950773		1755.73	-0.181803	0.344751	0.26914	0.60391	0.922511					1667.74	-0.0109018	0.229679	0.0022935	0.961804	0.989944		2072.86	0.429697	0.252634	2.97438	0.0845927	1
ENSMUSG00000009030	Pdcl	79.9174	-1.39484	0.731644	4.18021	0.0408986	0.279331		79.0201	-0.400065	0.336353	1.41651	0.233978	0.504495		108.555	-0.527759	0.372994	2.19534	0.138429	0.609979					65.9716	0.0567022	0.268866	0.0436488	0.834508	NA		104.543	-0.0675324	0.324472	0.0431854	0.835377	1
ENSMUSG00000009035	Tmem184b	101.166	-0.470959	0.568622	0.724517	0.394666	0.753452		118.358	-0.212009	0.337871	0.399673	0.527258	0.755151		125.129	-0.111658	0.353211	0.105168	0.745714	0.957939					104.939	0.0846992	0.239856	0.120165	0.728856	NA		144.471	0.105823	0.338795	0.0984876	0.753652	1
ENSMUSG00000009073	Nf2	71.1908	-0.491376	0.935246	0.31163	0.576682	0.854617		78.4779	-0.154757	0.366291	0.177215	0.673778	0.846248		100.068	-0.0101268	0.513805	0.000402073	0.984002	0.998163					63.8029	0.165256	0.310117	0.25942	0.610519	NA		88.1598	-0.913017	0.374202	5.61619	0.0177953	1
ENSMUSG00000009079	Ewsr1	175.43	-1.13547	0.545038	4.9688	0.0258086	0.221847		197.319	0.0591009	0.271273	0.0482745	0.826093	0.924542		233.001	-0.314579	0.42165	0.628623	0.427861	0.85046					172.212	0.038303	0.205372	0.034883	0.851841	0.961524		270.482	0.195261	0.313324	0.394261	0.530068	1
ENSMUSG00000009090	Ap1b1	359.387	1.0076	0.458401	4.28654	0.0384153	0.271976		519.069	0.994337	0.271356	13.5987	0.000226338	0.00505347		311.935	0.0616798	0.355712	0.0286053	0.865694	0.979454	B				458.148	-0.654482	0.172134	14.9196	0.00011219	0.0491854		359.896	-0.47378	0.286512	2.63319	0.104651	1
ENSMUSG00000009092	Derl3	12.2966	-0.265532	2.31818	0.0185553	0.891649	0.973806		7.35203	-0.338927	0.80743	0.227527	0.633364	0.824302		11.4872	-0.439986	0.95736	0.226602	0.634055	0.929611					7.74816	1.14437	0.73795	2.05744	0.151465	NA		14.9331	-1.84397	0.871619	4.11085	0.042609	1
ENSMUSG00000009112	Bcl2l13	70.2452	-0.230875	0.810474	0.083338	0.772824	0.932093		104.833	-0.571499	0.237111	5.72929	0.0166842	0.106408		125.01	0.569097	0.355455	2.43228	0.11886	0.577607					91.4447	0.303259	0.257285	1.31462	0.251559	NA		133.528	-0.516468	0.351902	2.07473	0.149757	1
ENSMUSG00000009145	Dqx1	10.4548	5.58335	2.24782	3.77476	0.0520313	0.314153		15.4466	-1.63144	0.845155	3.48611	0.0618857	0.238125		16.0933	3.37839	1.16465	5.2087	0.0224741	0.272847					15.5865	0.851811	0.729607	1.15983	0.281501	NA		21.7462	0.21852	0.974351	0.0496225	0.823722	1
ENSMUSG00000009185	Ccl8	5.06628	6.8738	3.3102	3.65628	0.0558584	NA		4.31097	-1.43614	1.26678	1.36512	0.242651	0.513828		4.56785	4.65595	1.93236	4.20644	0.0402707	0.36495					2.88756	-0.0986286	1.22182	0.00457948	0.946047	NA		5.78062	0.559203	1.27004	0.24352	0.621675	1
ENSMUSG00000009207	Lnpk	332.058	-0.0616805	0.518361	0.0132868	0.908232	0.977617		319.552	0.731485	0.314379	5.41338	0.019983	0.118585		262.408	-1.03597	0.439428	5.94219	0.0147827	0.225064					284.706	-0.544184	0.266468	4.05036	0.0441619	0.384804		242.467	0.601264	0.368994	2.74465	0.0975802	1
ENSMUSG00000009248	Ascl2	6.40941	-0.345746	1.78401	0.0350143	0.851566	NA		9.6773	-1.09329	0.956606	1.25682	0.262254	0.534189		9.47021	0.460576	1.30575	0.106237	0.74447	0.957775					6.2992	-0.836274	0.808014	0.713648	0.398235	NA		8.7257	-1.27118	1.1522	1.11022	0.292034	1
ENSMUSG00000009291	Pttg1ip	7748.48	-0.945962	0.466264	4.63944	0.0312452	0.244897		10601.5	-0.719405	0.309928	5.34993	0.0207231	0.121661		13892.8	-0.00372357	0.494374	4.53548e-05	0.994627	0.999735					8533.7	0.102702	0.169478	0.365434	0.545504	0.873707		14537.6	-0.0914116	0.350761	0.0672827	0.795335	1
ENSMUSG00000009292	Trpm2	36.9726	-2.59914	1.29605	5.30343	0.0212835	0.20083		32.5885	0.279783	0.569103	0.245774	0.620067	0.817503		46.7785	-1.08017	0.884053	1.93964	0.163707	0.646158					42.296	0.882847	0.366864	5.59396	0.0180226	NA		44.9621	0.110088	0.682866	0.0262899	0.871194	1
ENSMUSG00000009293	Ube2g2	144.419	0.920252	0.532407	2.67037	0.102233	0.436675		136.423	-0.00756763	0.300849	0.000627732	0.980011	0.994514		144.649	0.626344	0.390311	2.70702	0.0999076	0.532769					125.784	0.279654	0.241105	1.28174	0.257576	0.697173		203.391	0.13706	0.313645	0.193033	0.660404	1
ENSMUSG00000009376	Met	15.5494	-1.46775	1.90501	0.57584	0.447948	0.783997		19.696	-1.82298	0.779364	4.83362	0.02791	0.146157		30.2742	0.803414	0.722806	1.41124	0.234851	0.721785					11.1087	0.0135551	0.752674	0.00249997	0.960123	NA		25.5176	-1.60668	0.749229	4.07231	0.0435916	1
ENSMUSG00000009378	Slc16a12	21.7025	-0.314958	1.16228	0.0672814	0.795337	0.942748		26.7981	-1.41827	0.545306	6.51012	0.0107262	0.0799524		39.7561	0.452569	0.62667	0.416429	0.518724	0.899765					20.0865	0.409321	0.433091	0.78811	0.374672	NA		44.8824	0.293756	0.510769	0.332865	0.563977	1
ENSMUSG00000009406	Elk1	29.5939	0.744689	1.04848	0.408472	0.522746	0.8276		29.5737	-0.493474	0.41998	1.3786	0.24034	0.511363		40.1605	0.263314	0.675562	0.108655	0.74168	0.956947					19.9783	-0.0466085	0.324491	0.0204569	0.886268	NA		52.9017	0.273474	0.551969	0.248356	0.618235	1
ENSMUSG00000009418	Nav1	445.053	1.5153	0.441489	10.2583	0.00136074	0.0404879		558.743	0.949975	0.347968	7.5748	0.00591901	0.0531314		466.818	0.205124	0.594303	0.0886644	0.765882	0.964572	A				550.052	-0.284512	0.230097	1.48586	0.222859	0.667637		484.059	-0.212346	0.405446	0.268759	0.604165	1
ENSMUSG00000009470	Tnpo1	748.139	-0.979336	0.408237	6.4035	0.0113896	0.139562		841.547	-0.162071	0.19461	0.694569	0.404615	0.66585		1018.15	-0.344132	0.31575	1.28048	0.257809	0.738103					732.612	-0.0135778	0.184721	0.00542371	0.941292	0.987352		1020.31	-0.0880933	0.28312	0.0962184	0.756416	1
ENSMUSG00000009535	Rnmt	417.397	0.121001	0.460864	0.067221	0.795427	0.942748		548.511	0.250425	0.254768	0.985264	0.320903	0.592629		524.201	0.0825412	0.329479	0.0609981	0.804925	0.971112					608.113	0.302755	0.287675	1.09411	0.295563	0.733692		631.788	0.264026	0.319323	0.696911	0.403823	1
ENSMUSG00000009545	Kcnq1	1.40725	2.14068	5.16639	0.0929384	0.760474	NA		3.80487	-1.3508	1.46175	0.851553	0.356113	0.623361		5.08807	4.19534	2.20703	3.13505	0.0766262	0.481093					0.923264	-1.16168	1.45827	0.743799	0.388446	NA		4.70694	-1.51749	1.48361	0.90978	0.340173	1
ENSMUSG00000009549	Srp14	953.347	-0.284574	0.456972	0.363707	0.546455	0.841218		1926.69	-0.445248	0.366526	1.49121	0.222028	0.490253		1549.07	0.15469	0.466345	0.0923713	0.761184	0.963054					2063.14	0.33643	0.284406	1.35537	0.244341	0.690955		2211.97	0.510535	0.417514	1.53179	0.215844	1
ENSMUSG00000009551	6330409D20Rik	22.2497	0.823479	1.49155	0.300486	0.583578	0.85704		14.331	-1.24751	0.722743	3.11943	0.0773641	0.269567		18.191	-0.745181	0.893316	0.617631	0.431929	0.851948					12.5182	0.655665	0.753183	0.570122	0.450211	NA		17.309	0.754634	0.733634	1.09134	0.296174	1
ENSMUSG00000009555	Cdk9	80.9801	1.2254	0.687329	2.91893	0.0875461	0.404001		78.8546	0.0103708	0.285115	0.00133016	0.970907	0.99079		84.4341	0.498554	0.402724	1.41044	0.234983	0.721785					70.1598	0.182583	0.198095	0.848423	0.356999	NA		111.692	0.133532	0.344318	0.151189	0.697402	1
ENSMUSG00000009563	Tor2a	8.76339	1.45526	2.37759	0.162392	0.686964	0.899355		8.94823	-0.240343	0.778548	0.0974613	0.754898	0.889067		10.6899	0.666762	1.18587	0.22001	0.639033	0.930814					8.50844	0.461576	0.605244	0.565495	0.452055	NA		12.5938	-0.182874	0.680658	0.0721736	0.788198	1
ENSMUSG00000009569	Mrtfb	60.8139	-0.19078	1.08899	0.0335225	0.854726	0.963004		80.331	-0.576122	0.535921	1.14342	0.28493	0.559086		102.106	0.509059	0.501788	1.00262	0.316677	0.782963					70.5511	0.453573	0.338455	1.78046	0.182093	NA		114.968	-0.755327	0.357991	4.23404	0.039621	1
ENSMUSG00000009575	Cbx5	142.664	0.624788	0.781221	0.57781	0.447172	0.783469		137.68	-0.0460055	0.361203	0.0161542	0.898862	0.958224		159.358	-0.0974224	0.491542	0.0342119	0.853257	0.976206					125.815	0.0585509	0.248531	0.0551819	0.81428	0.95115		168.574	0.0463379	0.337764	0.0187497	0.891086	1
ENSMUSG00000009585	Apobec3	583.054	-0.593292	0.422334	2.13174	0.144277	0.507145		498.208	-0.29814	0.222836	1.79357	0.180492	0.437427		732.832	-0.352443	0.322334	1.26892	0.259969	0.740375					386.389	0.0840228	0.196889	0.183505	0.668379	0.91885		765.317	-0.0351581	0.271809	0.016707	0.897155	1
ENSMUSG00000009588	St6galnac1	37.5113	0.2849	1.03988	0.0837927	0.772222	0.932093		73.7933	0.809369	0.564409	1.88469	0.169802	0.422517		38.0924	1.90498	1.05194	3.30958	0.0688772	0.458143					72.0504	-0.194547	0.343242	0.314884	0.574699	NA		39.1844	-0.0445282	0.626696	0.0031254	0.955417	1
ENSMUSG00000009614	Sardh	31.2551	4.41848	1.70665	3.18458	0.0743362	0.378338		21.5859	0.0782355	0.454025	0.0297684	0.863017	0.9413		21.6976	0.906972	1.06023	0.403456	0.52531	0.901328			SARDH		22.8961	0.15109	0.397632	0.145438	0.702933	NA		22.0341	0.221074	0.619375	0.128034	0.72048	1
ENSMUSG00000009621	Vav2	54.6831	-0.668351	0.725146	0.888035	0.34601	0.71549		46.5067	-1.15443	0.492955	5.16709	0.0230188	0.12949		66.4757	0.267652	0.589045	0.229307	0.632038	0.928978					36.216	0.612788	0.408844	2.02189	0.155046	NA		84.9762	-0.0873891	0.424415	0.0422589	0.837127	1
ENSMUSG00000009628	Tex15	2.17287	2.60602	3.87611	0.462495	0.49646	NA		6.36556	2.30218	1.15598	3.78695	0.0516537	0.213356		2.05606	1.25038	2.23214	0.235907	0.627178	NA					7.59183	0.115773	0.722047	0.0250502	0.874242	NA		3.38063	0.106521	1.56366	0.0043588	0.947361	1
ENSMUSG00000009630	Ppp2cb	106.849	-0.0560562	0.778862	0.00495692	0.943871	0.987004		119.388	0.321836	0.281315	1.3281	0.249143	0.520611		117.785	-0.277524	0.363113	0.585179	0.444289	0.858054					104.922	-0.203068	0.273592	0.549477	0.458531	NA		134.903	0.39796	0.312303	1.66052	0.197533	1
ENSMUSG00000009633	G0s2	56.5282	-1.17847	1.00886	1.5168	0.218105	0.600018		62.8643	-0.328923	0.495925	0.444201	0.505102	0.740082		73.9558	-0.384443	0.590307	0.480435	0.488226	0.882915					74.4126	0.713995	0.291013	5.54364	0.018548	NA		68.199	-0.216738	0.444465	0.234097	0.628502	1
ENSMUSG00000009640	Dmap1	16.2373	1.465	1.41525	1.13051	0.287667	0.664054		24.0601	-0.889055	0.525544	2.72936	0.0985191	0.31025		25.0475	1.5805	0.690952	5.10678	0.0238326	0.280865				DMAP1	19.9089	0.402521	0.42089	0.844605	0.358083	NA		38.1688	-0.201371	0.456728	0.192101	0.661174	1
ENSMUSG00000009647	Mcu	150.618	-0.573037	0.566688	1.08492	0.297599	0.672074		191.932	-0.372551	0.34467	1.16534	0.280362	0.554219		257.108	0.217826	0.370557	0.319208	0.572084	0.915914		ENSMUSG00000009647			161.779	0.476544	0.277524	2.83165	0.0924233	0.496788		296.072	-0.173203	0.277978	0.383764	0.535595	1
ENSMUSG00000009654	Oit3	39.5699	-2.62935	1.4271	4.71556	0.0298908	0.239852		26.321	-0.0247132	0.547232	0.00207705	0.963649	0.988075		40.8473	-2.00075	0.66944	10.9164	0.000953191	0.0496724	F				23.8435	0.0701799	0.508392	0.0174433	0.894927	NA		28.036	0.405281	0.537231	0.581363	0.445779	1
ENSMUSG00000009681	Bcr	216.779	1.11173	0.639144	2.43329	0.118783	0.468249		308.044	0.0891552	0.35973	0.0621979	0.803055	0.914069		310.156	0.606435	0.595651	0.718556	0.396618	0.837512					255.94	-0.342202	0.246653	1.88794	0.169434	0.615376		379.338	-0.04188	0.390361	0.0113919	0.915001	1
ENSMUSG00000009687	Fxyd5	834.466	0.74802	0.407736	3.14025	0.0763823	0.382555		924.354	0.608672	0.237427	6.59312	0.0102374	0.0773495		991.971	0.135363	0.393317	0.105583	0.74523	0.957775					966.503	0.232787	0.188833	1.50728	0.219555	0.662778		1266.98	0.544339	0.301835	3.36828	0.0664633	1
ENSMUSG00000009731	Kcnd1	143.904	1.38277	1.22442	0.651406	0.419611	0.769559		179.238	-0.580297	0.601111	0.942066	0.331747	0.601627		183.327	0.10404	0.979085	0.00602187	0.938146	0.993313					165.102	-0.190494	0.399229	0.228215	0.632851	0.908699		206.829	0.363722	0.665111	0.300129	0.583802	1
ENSMUSG00000009733	Tfcp2	22.0727	-0.632701	1.22498	0.241808	0.622903	0.873378		21.6052	0.353292	0.533332	0.448889	0.502863	0.738877		23.8347	-0.607982	0.758952	0.671166	0.412645	0.843651					20.4054	-0.0127298	0.476677	0.000708106	0.978771	NA		30.4947	0.956511	0.599482	2.66579	0.102527	1
ENSMUSG00000009739	Pou6f1	22.3655	0.418053	1.06769	0.16138	0.687889	0.899513		34.844	-0.723295	0.502211	1.97255	0.160178	0.40972		40.7957	1.15227	0.519767	4.73864	0.0294924	0.314907					26.6017	0.101146	0.425387	0.0512422	0.820916	NA		53.6142	-0.871127	0.365135	5.47231	0.0193201	1
ENSMUSG00000009741	Ubp1	93.3023	0.399417	0.770715	0.221287	0.638061	0.879135		129.784	1.43935	0.300772	22.7965	1.80098e-06	9.71382e-05		84.0494	-0.839378	0.552137	2.01992	0.155247	0.628687	B				117.294	-0.733032	0.253423	8.62687	0.0033124	0.166385		77.0236	0.475258	0.416114	1.3302	0.24877	1
ENSMUSG00000009772	Nuak2	187.309	-0.226138	0.642641	0.121181	0.727757	0.913543		110.544	0.260221	0.341478	0.576141	0.447829	0.701098		169.883	-1.12666	0.377505	9.89344	0.00165869	0.07232					103.88	0.0258501	0.308664	0.00702385	0.933209	NA		131.769	-0.104934	0.349142	0.0899684	0.764217	1
ENSMUSG00000009828	Cilk1	63.6492	0.330954	0.752873	0.184884	0.667209	0.892312		79.3519	0.0975298	0.38944	0.0627523	0.802198	0.913968		65.1593	-0.170134	0.431929	0.153662	0.69506	0.945937					78.758	-0.0532062	0.274526	0.0377591	0.845928	NA		69.9941	-0.0115687	0.331731	0.00121199	0.972228	1
ENSMUSG00000009863	Sdhb	915.495	-1.44697	0.502449	9.55523	0.0019938	0.0506056		904.059	-0.684162	0.281571	5.77643	0.0162425	0.104734		1323.55	-0.0988401	0.505312	0.0448957	0.832196	0.973823		ENSMUSG00000009863			713.022	0.308361	0.20113	2.29599	0.129708	0.559705		1328.72	-0.0896641	0.328157	0.0741942	0.785325	1
ENSMUSG00000009894	Snap47	118.606	-2.27463	0.790217	8.79657	0.00301797	0.0659048		109.984	-1.36406	0.319102	17.5127	2.85392e-05	0.000951372		185.151	-0.741801	0.44373	2.83229	0.0923866	0.518675	B				67.9815	0.0293391	0.233565	0.0155367	0.900804	NA		184.112	0.0374993	0.36861	0.0102787	0.919246	1
ENSMUSG00000009905	Kdsr	81.9309	2.11653	1.05409	2.50176	0.113719	0.458967		113.717	-2.14693	0.577098	11.8074	0.000589967	0.0102637		185.948	2.47056	0.811825	7.09008	0.00775116	0.162943	B				39.9352	-0.175926	0.309082	0.323625	0.569437	NA		155.222	-1.96428	0.612426	8.54148	0.00347143	1
ENSMUSG00000009907	Vps4b	486.365	-0.29636	0.383961	0.612303	0.433922	0.776488		493.923	0.0444551	0.157868	0.0787268	0.77903	0.903504		594.342	-0.228451	0.252154	0.853963	0.355434	0.811764					461.082	0.1429	0.129374	1.20503	0.272319	0.712308		616.779	0.0128694	0.182837	0.00495874	0.943861	1
ENSMUSG00000009927	Rps25	205.06	1.08584	0.768171	1.44231	0.229767	0.611719		206.879	-0.530666	0.408293	1.69342	0.193151	0.453842		239.985	0.608798	0.597725	0.900679	0.3426	0.802135					206.707	0.524663	0.249625	4.2924	0.038283	0.369704		410.95	0.761871	0.412866	3.56604	0.0589729	1
ENSMUSG00000009995	Taz	125.717	-0.188729	0.765488	0.0535334	0.817025	0.95129		119.644	-0.347455	0.322676	1.12044	0.289824	0.563716		160.834	-0.0310332	0.452575	0.00453813	0.946291	0.994946					87.0301	-0.0996215	0.229588	0.18597	0.666292	NA		158.271	-0.559991	0.27785	3.90917	0.0480235	1
ENSMUSG00000010025	Aldh3a2	144.555	-0.243561	0.745056	0.112112	0.737752	0.919444		156.611	-1.71324	0.427913	14.5799	0.000134341	0.00325698		244.618	0.870046	0.608793	2.12292	0.14511	0.618142	B				93.4546	0.575346	0.260244	4.4229	0.0354597	NA		213.602	-1.53681	0.464271	9.53864	0.00201191	1
ENSMUSG00000010045	Tmem115	66.8438	-0.328046	0.764892	0.204076	0.65145	0.885426		61.9281	0.330022	0.396244	0.704113	0.401405	0.663498		64.5207	-0.666827	0.51005	1.76587	0.183894	0.670754			TMEM115		53.5024	-0.234095	0.381125	0.387797	0.53346	NA		68.0573	-0.196529	0.416894	0.218137	0.640463	1
ENSMUSG00000010047	Hyal2	18.1688	0.599467	1.36495	0.194144	0.65949	0.888952		13.5312	0.0310334	0.818735	0.00143389	0.969794	0.99031		17.463	-0.104023	0.815742	0.0153976	0.901246	0.986119					9.86938	-0.185079	0.606619	0.0948566	0.758092	NA		16.226	-0.0687728	0.658421	0.0108527	0.91703	1
ENSMUSG00000010048	Ifrd2	635.44	-0.460264	0.655947	0.564508	0.45245	0.786721		1277.46	1.67988	0.355738	22.0919	2.59901e-06	0.000133673		674.21	-0.483792	0.482983	1.05662	0.303987	0.773977	B				1307.14	-0.409291	0.308742	1.79193	0.180691	0.62696		659.616	0.171134	0.398371	0.18699	0.665434	1
ENSMUSG00000010051	Hyal1	4.30088	-4.11604	3.28101	0.70997	0.399454	NA		7.91284	-1.71673	1.22532	1.8831	0.169983	0.422711		10.5857	0.877529	1.45937	0.282951	0.594774	0.920648					8.53279	0.814352	0.811876	0.750438	0.386337	NA		8.2153	-0.481396	1.21354	0.150229	0.698317	1
ENSMUSG00000010054	Tusc2	218.53	0.731661	0.479386	2.26834	0.132041	0.488277		223.164	-0.276321	0.253979	1.17273	0.278842	0.552049		256.594	0.547528	0.335809	2.67755	0.101772	0.537038					186.927	0.150577	0.163359	0.846638	0.357505	0.778525		322.38	0.100748	0.25239	0.160613	0.688593	1
ENSMUSG00000010057	Nprl2	31.4535	1.26563	1.03397	1.5136	0.218591	0.600438		40.6983	-0.0479292	0.463213	0.0104386	0.918622	0.968383		43.4827	1.357	0.579376	5.3503	0.0207187	0.264774					36.7768	0.459359	0.335484	1.81892	0.177442	NA		57.3386	-0.108078	0.443121	0.0591047	0.807917	1
ENSMUSG00000010066	Cacna2d2	4.11857	5.01444	3.19273	1.27048	0.259677	NA		4.45677	1.15034	1.06208	1.0808	0.298518	0.571321		2.18244	3.32103	2.21131	1.81269	0.178186	NA					3.30819	-1.14267	0.949402	1.26043	0.261571	NA		4.22173	0.530193	1.37068	0.154509	0.694263	1
ENSMUSG00000010067	Rassf1	3.75811	3.94287	4.42061	0.830993	0.361985	NA		3.80239	4.2065	1.49668	7.89156	0.00496659	0.0473982		3.05419	0.125105	2.5845	0.00491972	0.944082	NA	B				4.34672	-0.332721	0.808222	0.168624	0.681338	NA		0.697835	0.917628	2.88781	0.176471	0.674423	1
ENSMUSG00000010080	Epn3	36.8662	-1.47166	1.50957	1.21436	0.270469	0.648242		38.9672	-2.37625	0.715486	8.96381	0.00275381	0.0313499		63.7364	1.55828	0.845329	3.56478	0.0590175	0.432333	B				16.1301	0.168079	0.838398	0.038507	0.844429	NA		61.9892	-0.002436	0.58	1.76311e-05	0.99665	1
ENSMUSG00000010095	Slc3a2	1270.95	0.605886	0.455358	1.6324	0.201372	0.578912		1860.05	-0.0958278	0.367148	0.0702423	0.790984	0.909676		1798.85	0.480991	0.389066	1.26665	0.260397	0.740788			SLC3A2		1799.24	-0.0675287	0.321659	0.0435902	0.834618	0.954434		2572.61	-0.0346781	0.42692	0.00656882	0.935404	1
ENSMUSG00000010097	Nxf1	96.4146	0.105775	0.770253	0.0208934	0.88507	0.971255		103.832	-0.104035	0.320698	0.101117	0.750493	0.886616		117.255	0.108681	0.439088	0.0671958	0.795464	0.969537					82.4515	-0.23639	0.259856	0.792834	0.373245	NA		138.19	-0.302567	0.302706	0.982905	0.321483	1
ENSMUSG00000010110	Stx5a	135.76	0.777055	0.6437	1.40438	0.235991	0.615995		200.093	0.366741	0.288759	1.64137	0.200137	0.462175		159.327	0.374242	0.430213	0.706975	0.40045	0.838131					206.097	0.0493502	0.207973	0.0566315	0.811901	0.950961		219.902	0.230521	0.361797	0.411488	0.521215	1
ENSMUSG00000010142	Tnfrsf13b	535.901	0.880566	0.574849	2.3314	0.126788	0.480091		636.27	-0.613351	0.322487	3.44702	0.0633657	0.241346		755.995	1.01855	0.375308	7.3724	0.00662324	0.151742					377.833	-0.488849	0.28673	3.00831	0.0828386	0.475878		944.336	-0.349361	0.313083	1.20955	0.271421	1
ENSMUSG00000010154	Spire2	7.10202	-4.66232	2.06594	6.04658	0.0139333	NA		0.682964	0.398086	2.63479	0.0380969	0.845249	NA		5.20298	-3.52858	2.18228	2.78672	0.0950486	0.524348					2.769	1.65687	1.1444	1.49401	0.221595	NA		2.00584	2.03155	2.2625	0.975381	0.323342	1
ENSMUSG00000010175	Prox1	8.01751	-3.7975	2.45629	2.41312	0.120322	0.471306		9.35526	-0.231691	0.878409	0.0699642	0.791389	0.909851		11.4343	-1.38103	1.08519	1.67406	0.195716	0.682583					7.34964	-0.277506	0.604503	0.205019	0.650699	NA		11.488	-0.692719	0.992656	0.453106	0.500864	1
ENSMUSG00000010277	2610507B11Rik	665.647	0.493063	0.399125	1.52499	0.216866	0.598252		894.604	-0.0432202	0.210322	0.0425426	0.836589	0.929423		950.823	0.353123	0.365615	0.778755	0.377522	0.823156					789.654	-0.0356227	0.212719	0.02818	0.866686	0.965664		1134.1	0.151807	0.216639	0.495677	0.481406	1
ENSMUSG00000010290	AI597479	24.3818	-0.637897	1.29941	0.248054	0.618449	0.871634		20.9571	-0.458121	0.533699	0.715742	0.397544	0.660175		32.4646	-0.125804	0.615099	0.0455288	0.831035	0.973226					18.1151	0.48598	0.441506	1.1501	0.283528	NA		31.4874	-0.322204	0.518633	0.381901	0.536588	1
ENSMUSG00000010307	Tmem86a	62.2117	0.104372	1.20408	0.00602593	0.938125	0.985087		107.334	-2.98658	0.890481	9.12164	0.00252604	0.029594		172.62	2.30425	1.00559	4.65896	0.0308919	0.320598	B				34.2754	0.293703	0.401929	0.521388	0.47025	NA		145.577	-2.48702	0.993131	4.87595	0.0272334	1
ENSMUSG00000010358	Ifi35	101.75	-0.205773	0.628803	0.109807	0.740364	0.920113		124.951	-0.303392	0.413802	0.538289	0.463143	0.711887		141.404	0.234921	0.387832	0.363007	0.546841	0.90711					119.278	0.405278	0.296597	1.83773	0.175217	0.6184		185.627	0.209995	0.369026	0.327197	0.567314	1
ENSMUSG00000010362	Rdm1	39.1603	1.2117	0.822781	1.96821	0.160637	0.530164		46.443	-0.815944	0.500098	2.3419	0.125936	0.357679		58.0608	1.12611	0.476656	5.36791	0.0205106	0.26331					42.9391	0.626248	0.441329	1.66854	0.196454	NA		81.7661	-0.265132	0.412423	0.407401	0.523291	1
ENSMUSG00000010376	Nedd8	2902.05	0.878483	0.522772	2.27872	0.13116	0.487207		3442.34	-0.0763468	0.288177	0.0704963	0.790616	0.909569		3359.02	0.357103	0.433576	0.57589	0.447928	0.859372					3330.77	0.110703	0.186305	0.351421	0.55331	0.876545		4126.82	0.296532	0.323462	0.854045	0.355411	1
ENSMUSG00000010392	Gosr1	76.9218	-2.34769	0.767666	11.7155	0.000619819	0.0248517		52.7452	-0.160102	0.391656	0.166921	0.682863	0.852527		86.2128	-1.03688	0.617861	3.5992	0.0578075	0.429063	A				45.7952	0.158545	0.280135	0.306855	0.579617	NA		65.1704	-0.442505	0.436907	0.996982	0.318042	1
ENSMUSG00000010406	Mrpl52	291.024	-0.0566843	0.84458	0.00319828	0.954901	0.989251		246.876	-0.166211	0.320781	0.270394	0.603067	0.807509		335.638	-0.201708	0.530402	0.133539	0.71479	0.951116					202.025	0.0571455	0.247999	0.053113	0.817732	0.9518		385.904	0.195981	0.263365	0.560566	0.454032	1
ENSMUSG00000010453	Kansl3	133.96	-1.07355	1.00327	1.49949	0.22075	0.601859		103.146	0.156423	0.336492	0.214305	0.643414	0.829748		152.466	-0.762549	0.613238	1.8575	0.172913	0.655841					78.282	-0.143985	0.290487	0.250354	0.616826	NA		150.07	0.0975611	0.358763	0.0747258	0.784576	1
ENSMUSG00000010517	Faf1	145.918	-0.228066	0.613196	0.150828	0.697746	0.903986		130.617	0.275417	0.309018	0.793949	0.372909	0.639393		144.52	-0.595682	0.421119	2.26944	0.131948	0.601136					131.677	0.0980395	0.225969	0.187725	0.664817	0.915824		157.255	0.216892	0.289195	0.569955	0.450277	1
ENSMUSG00000010538	Tsacc	4.41136	2.95292	4.85123	0.265946	0.606064	NA		3.14645	0.498591	1.42442	0.126641	0.721941	NA		5.58514	3.41922	2.2096	1.3822	0.239726	0.725256					5.58483	1.33403	0.771855	2.82175	0.0929951	NA		3.4347	0.436207	1.73462	0.0638851	0.800458	1
ENSMUSG00000010554	Mettl16	28.3137	2.14804	1.36174	1.50651	0.219673	0.601859		43.7897	-0.158514	0.33922	0.214062	0.643602	0.829768		46.4806	1.56867	0.650352	3.91359	0.0478973	0.39248					34.4398	-0.138545	0.296915	0.208815	0.647697	NA		58.288	-0.120188	0.305758	0.153255	0.695444	1
ENSMUSG00000010601	Apol7a	7.62691	0.10896	2.50858	-0.008279	1	1		21.3717	-2.01652	1.07936	2.69429	0.100709	0.313919		21.0016	3.24902	1.22613	6.5764	0.010334	0.186351					11.2097	-0.934491	0.802053	0.768153	0.380789	NA		31.9209	1.14241	0.795142	2.30219	0.129192	1
ENSMUSG00000010607	Pigyl	51.5193	0.125968	0.935081	0.0164451	0.89796	0.975216		45.5698	0.033258	0.488573	0.00457842	0.946053	0.979658		55.4416	0.174241	0.529012	0.110692	0.739357	0.956137					44.0086	0.386654	0.376313	1.04998	0.305511	NA		68.7322	0.344598	0.366194	0.902232	0.342184	1
ENSMUSG00000010608	Rbm25	434.1	1.79624	0.88522	2.51581	0.11271	0.457461		367.2	0.215209	0.301117	0.505838	0.476946	0.721027		467.412	0.445439	0.57597	0.440131	0.507059	0.893284				RBM25	316.678	-0.153245	0.230409	0.445769	0.504351	0.848242		508.627	0.45571	0.407278	1.28337	0.257273	1
ENSMUSG00000010609	Psen2	175.204	1.09946	0.593321	2.90126	0.0885105	0.406609		185.598	0.335212	0.261256	1.64957	0.199017	0.460853		196.817	0.32907	0.369891	0.708949	0.399793	0.838131		ENSMUSG00000010609			173.316	0.0225331	0.237606	0.00890209	0.92483	0.982726		238.785	-0.00220094	0.235665	8.7177e-05	0.99255	1
ENSMUSG00000010660	Plcd1	2.93275	-4.39739	4.66242	1.20311	0.272702	NA		6.96323	-0.668548	1.09541	0.349173	0.554582	0.774239		10.4294	1.48509	1.32185	1.3454	0.246083	0.731047					4.05211	0.991577	1.33008	0.159491	0.689626	NA		11.0523	-0.153493	1.38126	0.0122458	0.911886	1
ENSMUSG00000010663	Fads1	13.6642	0.812643	1.34293	0.335973	0.562163	0.846845		14.2321	1.31388	0.780514	2.91819	0.0875861	0.29059		10.3954	-0.640739	1.08887	0.33502	0.562718	0.911124					16.6457	-0.0537931	0.508891	0.0107141	0.917559	NA		14.0182	0.532702	0.817414	0.443471	0.505452	1
ENSMUSG00000010721	Lmbr1	10.8769	-3.02727	2.84681	0.337233	0.561431	0.846142		12.0065	-0.48649	0.813165	0.348745	0.554824	0.774302		12.5405	0.736358	1.52032	0.163324	0.686114	0.942228					7.68322	-0.976325	0.689025	1.68949	0.193668	NA		10.7947	-1.81955	0.997853	2.97851	0.0843767	1
ENSMUSG00000010751	Tnfrsf22	51.1835	0.67301	0.975352	0.506869	0.476497	0.801443		30.9384	-1.20578	0.471062	6.43325	0.0112004	0.0824937		47.2292	0.324048	0.53506	0.39752	0.528373	0.901328					17.8258	0.199967	0.412751	0.235012	0.627832	NA		44.5968	-1.1081	0.49781	4.60472	0.0318841	1
ENSMUSG00000010755	Cars	35.5438	3.72018	1.54386	2.95142	0.085802	0.401866		31.8534	0.0737557	0.473923	0.023754	0.877513	0.948871		37.4521	1.46348	0.851377	1.92799	0.164978	0.647012					36.6414	0.48931	0.296402	2.63613	0.104458	NA		49.2718	0.68653	0.407541	2.94443	0.0861742	1
ENSMUSG00000010911	Apip	47.5822	-0.481768	0.79666	0.35718	0.550076	0.843224		49.2691	-0.121918	0.489448	0.063596	0.8009	0.913965		50.2541	-0.204895	0.584299	0.132949	0.715393	0.951116					51.3669	0.315224	0.367414	0.722591	0.395295	NA		66.8265	0.406724	0.451117	0.832081	0.361672	1
ENSMUSG00000010914	Pdhx	43.2925	-0.338411	0.928749	0.126249	0.722354	0.91237		48.0783	-0.871517	0.536786	2.39916	0.121401	0.350992		61.8253	0.585513	0.630941	0.963366	0.32634	0.78886					35.1229	0.0847319	0.416866	0.0405385	0.840431	NA		61.9112	-0.903406	0.537974	2.63474	0.104549	1
ENSMUSG00000010936	Vac14	38.7163	1.20231	1.42438	0.794981	0.372598	0.73534		41.5479	-0.397279	0.444866	0.793132	0.373155	0.639444		45.8526	0.947997	0.7121	1.68884	0.193754	0.680287					29.5073	-0.0140973	0.36107	0.00147585	0.969355	NA		60.2651	-0.0637759	0.41112	0.0239911	0.876908	1
ENSMUSG00000011008	Mcoln2	46.1319	-2.2031	0.957807	6.60351	0.0101778	0.132268		34.0382	-1.05621	0.46776	4.75493	0.0292145	0.150471		63.8511	-0.187014	0.700721	0.0883115	0.766335	0.964572					18.5946	0.182168	0.430755	0.172198	0.678166	NA		60.1735	-0.184882	0.41713	0.194698	0.659035	1
ENSMUSG00000011034	Slc5a1	84.8933	-2.8967	1.10951	9.39937	0.0021706	0.0538422		136.702	-2.82281	1.07264	5.41251	0.0199929	0.118585		222.373	1.9985	1.27378	2.29153	0.130081	0.597453					41.8995	-0.551829	0.984626	0.305564	0.580415	NA		195.289	-0.415267	0.524158	0.606385	0.436152	1
ENSMUSG00000011096	Akt1s1	26.1055	-1.31699	1.08331	1.67283	0.195879	0.573046		19.4841	0.904499	0.600595	2.1244	0.144969	0.389031		25.1779	-1.2137	0.745833	3.41256	0.064702	0.44696					16.112	-0.488864	0.435685	1.26892	0.25997	NA		21.1111	0.293575	0.640578	0.21462	0.64317	1
ENSMUSG00000011114	Tbrg1	18.595	-1.38464	1.24434	1.40791	0.235403	0.615694		16.8623	0.0239915	0.721113	0.00106742	0.973937	0.991774		25.2629	-0.624201	0.690113	0.872742	0.350197	0.808911					12.0714	-0.482749	0.682391	0.479009	0.488872	NA		20.9212	0.258325	0.580918	0.19885	0.65565	1
ENSMUSG00000011118	Panx3	0.488999	3.53169	5.85369	0.554557	0.456462	NA		6.00559	0.504912	3.43567	-0.0643242	1	1		4.34394	4.94807	2.50555	3.17548	0.0747512	0.475032					2.91216	-1.63251	2.43273	0.479374	0.488706	NA		7.3957	1.30025	2.41688	0.315446	0.574357	1
ENSMUSG00000011148	Adssl1	72.8997	0.480369	0.730042	0.412752	0.520576	0.826662		52.0832	0.263202	0.440296	0.35966	0.548695	0.770389		58.2741	-0.653604	0.507925	1.71523	0.190308	0.675863					55.0638	0.246125	0.345872	0.474115	0.4911	NA		65.4259	0.0426796	0.37693	0.0129244	0.909487	1
ENSMUSG00000011158	Brf1	67.1647	0.697236	0.663199	1.07187	0.300524	0.674134		116.816	0.633287	0.272689	5.46663	0.019383	0.116597		78.6476	0.615762	0.405115	2.27812	0.131211	0.599753					105.58	-0.396129	0.23784	2.8486	0.0914533	NA		101.307	-0.237668	0.297613	0.629465	0.427552	1
ENSMUSG00000011179	Odc1	1829.56	1.4609	0.402632	11.109	0.000859097	0.0309908		2598.26	1.30387	0.294746	19.6609	9.24757e-06	0.000371995		1112.17	-0.217941	0.435133	0.226809	0.6339	0.929611	C				2855.26	-0.201131	0.206663	0.932457	0.334225	0.762628		1179.07	-0.141862	0.334596	0.177265	0.673735	1
ENSMUSG00000011254	Thg1l	12.9044	5.70089	1.97203	7.18154	0.00736576	0.108716		9.17975	-1.12527	0.738833	2.12024	0.145364	0.389758		12.065	3.25129	1.10817	7.00992	0.00810595	0.167139					6.32289	0.0598186	0.714971	0.00639146	0.93628	NA		15.4865	0.042054	0.641684	0.00427819	0.947849	1
ENSMUSG00000011256	Adam19	61.5899	0.487439	0.898582	0.307319	0.57933	0.856252		57.0506	1.00885	0.408303	6.05687	0.0138523	0.0942754		56.9259	-0.595941	0.431532	2.10445	0.146871	0.620977					74.2345	0.397325	0.420043	0.880575	0.348044	NA		58.039	-0.187165	0.395971	0.22175	0.63771	1
ENSMUSG00000011257	Pabpc4	3434.03	1.32579	0.520835	5.23358	0.0221549	0.205378		4760.44	0.496994	0.313894	2.57321	0.108687	0.329548		3237.9	0.299651	0.393482	0.488585	0.484559	0.880409					4793.06	-0.202943	0.246444	0.691275	0.405731	0.805766		4503.11	0.343452	0.278958	1.55014	0.213115	1
ENSMUSG00000011263	Exoc3l2	1.90996	-5.07514	5.3696	1.22851	0.267696	NA		2.66363	-1.02689	1.44135	0.56692	0.451485	NA		3.90136	-0.265814	1.49217	-0.000208448	1	NA					0.793022	-2.9719	2.19902	2.20472	0.137589	NA		3.73333	0.438382	1.11825	0.153034	0.695653	1
ENSMUSG00000011267	Zfp296	32.8205	2.46617	1.19523	3.80624	0.051062	0.3124		27.6699	-0.447899	0.487445	0.81494	0.366664	0.632608		35.495	1.15455	0.732258	2.02939	0.154282	0.627761					16.5767	-0.328193	0.453221	0.507499	0.476223	NA		37.558	-0.504109	0.519416	0.917474	0.338139	1
ENSMUSG00000011305	Plin5	0.976271	4.68961	5.80951	0.788729	0.374485	NA		3.46472	1.96603	1.65447	1.2612	0.261423	0.533252		0.892525	3.11958	3.76549	0.937034	0.333042	NA					7.93805	1.22543	0.839776	1.86334	0.17224	NA		1.6001	0.31355	2.13743	0.0221496	0.88169	1
ENSMUSG00000011306	Sugp1	72.5879	0.669701	0.745591	0.784549	0.375754	0.737575		77.6278	-0.256389	0.325246	0.620684	0.430793	0.686723		84.9949	0.456452	0.422553	1.13635	0.286426	0.762129					58.2528	-0.304085	0.295395	1.00948	0.315028	NA		106.506	-0.29903	0.305298	0.941238	0.33196	1
ENSMUSG00000011382	Dhdh	25.1333	0.548384	1.40781	0.147154	0.70127	0.904627		22.0509	-0.530657	0.737701	0.507041	0.476423	0.720979		27.6791	0.0622987	0.821713	0.00542972	0.94126	0.993739					20.357	0.504714	0.483135	1.00732	0.315547	NA		27.1355	-0.607129	0.639609	0.860774	0.353522	1
ENSMUSG00000011427	Zfp790	12.6352	-0.374575	1.8159	0.0540443	0.81617	0.950656		10.9482	-0.223569	0.7531	0.0845676	0.7712	0.898403		13.3747	-0.56307	0.794654	0.554896	0.456324	0.864894					10.9347	0.336497	0.541976	0.385686	0.534576	NA		14.1122	0.475924	0.736608	0.427606	0.513166	1
ENSMUSG00000011658	Fuz	4.60583	3.93931	3.40011	0.585339	0.444227	NA		3.07524	1.95181	1.27731	2.53997	0.110997	NA		0.923749	-2.19777	3.33655	0.229536	0.631868	NA					5.20873	0.63802	0.594097	1.0787	0.298989	NA		2.63695	3.05405	1.69125	3.63798	0.0564754	1
ENSMUSG00000011751	Sptbn4	5.62589	-2.97448	2.68829	1.3866	0.23898	NA		4.04247	1.00997	1.17379	0.762606	0.382514	0.64737		4.01221	-1.87859	1.89318	1.30283	0.253696	NA					4.27974	-0.458971	0.668893	0.409109	0.522422	NA		2.00075	-0.408317	2.158	0.0357482	0.850036	1
ENSMUSG00000011752	Pgam1	56.449	-0.466271	0.966569	0.24579	0.620055	0.872372		44.3507	0.492877	0.483027	0.992856	0.319045	0.5912		53.5458	-0.735929	0.565066	2.04491	0.152716	0.625637					40.0917	-0.167549	0.430344	0.15356	0.695157	NA		48.3142	-0.173605	0.413902	0.174722	0.675949	1
ENSMUSG00000011831	Evi5	873.289	1.41181	0.818307	1.93298	0.164433	0.536681		991.653	0.858549	0.320653	7.27839	0.00697892	0.0595047		724.46	-0.221813	0.617779	0.0976001	0.754729	0.960428					983.494	-0.306535	0.285931	1.17727	0.277912	0.718972		846.468	0.607427	0.41039	2.25786	0.132938	1
ENSMUSG00000011832	Evi5l	20.0195	-2.90858	1.27534	6.54872	0.0104959	0.133703		17.364	-0.553825	0.5298	1.09123	0.296198	0.569588		24.8414	-1.09902	0.689878	3.0544	0.0805187	0.491311					14.2957	-0.15443	0.460591	0.10539	0.745455	NA		30.2038	0.63884	0.52613	1.53251	0.215736	1
ENSMUSG00000011837	Snapc2	36.0415	0.581422	1.03514	0.27411	0.600588	0.863968		39.5282	-0.329285	0.489893	0.448103	0.503237	0.739222		42.7097	0.627456	0.605139	1.00368	0.316422	0.782745					31.1925	0.173133	0.329738	0.262695	0.608275	NA		49.2847	-0.901677	0.423208	4.30491	0.0380025	1
ENSMUSG00000011877	Git1	59.7297	-0.84553	0.79436	1.29913	0.254372	0.631568		52.7009	-0.26296	0.387412	0.448889	0.502863	0.738877		68.5335	-0.213583	0.509162	0.205194	0.650561	0.933433					42.6452	0.186402	0.346137	0.288025	0.591489	NA		71.2684	0.00777846	0.491478	0.000250765	0.987366	1
ENSMUSG00000011884	Gltp	662.901	0.151621	0.600797	0.0647738	0.799104	0.944431		710.22	-0.225874	0.199351	1.27839	0.258199	0.529984		782.021	0.279319	0.333421	0.724556	0.394654	0.836397					546.405	-0.167862	0.181606	0.862751	0.35297	0.774335		1017.65	0.309874	0.27904	1.26095	0.261471	1
ENSMUSG00000011958	Bnip2	436.52	0.752707	0.499159	2.14026	0.143477	0.506219		470.618	0.531405	0.299915	3.11298	0.0776709	0.270178		447.278	0.0588306	0.293881	0.0393286	0.842799	0.974417					485.193	0.130148	0.200411	0.416526	0.518676	0.856705		540.921	-0.317387	0.259991	1.45562	0.227628	1
ENSMUSG00000011960	Ccnt1	301.145	0.322463	0.421885	0.562372	0.453306	0.787314		291.666	0.0873699	0.256896	0.113637	0.736041	0.878932		333.797	-0.147445	0.342952	0.181767	0.669859	0.937023					264.845	-0.0197755	0.181751	0.0115928	0.914258	0.97888		339.073	-0.228251	0.302224	0.55893	0.454692	1
ENSMUSG00000012076	Brms1l	14.2376	-0.684421	1.59701	0.133108	0.715231	0.910531		15.9694	0.121733	0.501187	0.0589033	0.808238	0.916923		13.7165	0.497989	0.946534	0.30573	0.580312	0.916888					14.1964	-0.118458	0.45508	0.0684708	0.793576	NA		15.3046	-0.543092	0.776527	0.473735	0.491274	1
ENSMUSG00000012114	Med15	130.29	0.0319544	0.561503	0.00309109	0.955662	0.989288		163.489	0.664144	0.258379	6.6707	0.00980106	0.0750988		142.681	-0.211289	0.393024	0.286596	0.59241	0.920268					154.484	-0.253145	0.249219	1.03062	0.310014	0.745036		165.561	0.109606	0.352541	0.0977321	0.754568	1
ENSMUSG00000012117	Dhdds	80.4877	-0.360198	0.866535	0.206541	0.649492	0.884678		66.9275	0.299213	0.376547	0.634307	0.42578	0.682508		76.9197	-0.44715	0.583492	0.698372	0.403331	0.839384					60.506	0.0666793	0.342849	0.037163	0.847134	NA		81.793	-0.251829	0.373446	0.44964	0.502506	1
ENSMUSG00000012123	Crybg2	26.6719	-5.21344	1.39165	16.8619	4.01995e-05	0.00364148		39.1418	-2.84061	0.735006	12.3947	0.000430545	0.00804186		57.0323	0.806431	0.981097	0.716251	0.397376	0.837512	C				18.8099	-0.137939	0.683771	0.0329829	0.855887	NA		51.6953	-0.287627	0.465742	0.376524	0.53947	1
ENSMUSG00000012126	Ubxn11	9.79971	0.259596	1.84392	0.0179342	0.893467	0.97432		9.03023	2.1816	1.01076	4.6397	0.0312405	0.157858		4.28045	-0.981868	1.5307	0.440931	0.506673	0.893181					12.1002	0.108402	0.6482	0.0264202	0.870878	NA		6.15442	0.0268752	1.30821	0.000413725	0.983772	1
ENSMUSG00000012187	Mogat1	64.5967	-2.47585	5.42601	-0.0501857	1	1		107.272	-10.5564	3.56611	4.09169	0.0430945	0.192197		203.824	5.78783	3.61129	1.22234	0.268902	0.747169					10.012	16.435	3.07816	1.75491	0.185261	NA		157.913	-8.44326	3.17981	3.08488	0.0790229	1
ENSMUSG00000012296	Tjap1	68.9088	0.830294	0.79249	1.159	0.281673	0.656987		53.834	-0.639993	0.438691	2.01994	0.155245	0.40319		63.4569	0.107653	0.552021	0.0388855	0.843676	0.974417					42.529	0.115378	0.414598	0.0738748	0.785776	NA		79.6812	-0.301507	0.446779	0.447983	0.503294	1
ENSMUSG00000012350	Ehf	11.9279	1.18848	1.58664	0.614046	0.433269	0.776488		38.1905	-0.416278	1.19344	0.117311	0.73197	0.878041		24.0547	1.87272	0.918657	4.47619	0.0343702	0.336142					40.5192	-0.466988	0.946986	0.0824276	0.774034	NA		32.9499	0.998474	0.833288	1.51536	0.218323	1
ENSMUSG00000012405	Rpl15	93.0716	1.03303	0.626038	2.40347	0.121067	0.472558		100.989	-0.254448	0.328012	0.600942	0.438219	0.692041		102.172	0.443728	0.444892	0.929606	0.334965	0.794429					97.5272	0.231776	0.217614	1.09892	0.294502	NA		133.886	0.194901	0.385648	0.259072	0.610758	1
ENSMUSG00000012422	Tmem167	364.108	-0.46613	0.478975	0.917684	0.338084	0.708685		318.49	-0.412904	0.220123	3.49142	0.0616877	0.237614		449.072	-0.417399	0.319871	1.68174	0.194693	0.681039					287.267	0.244241	0.17422	1.93019	0.164738	0.606699		472.854	0.266134	0.254865	1.1074	0.292648	1
ENSMUSG00000012428	Steap4	43.3811	-3.46866	1.51158	7.05799	0.00789124	0.113089		27.4499	0.78399	0.796476	0.969024	0.324924	0.596232		44.3097	-2.51647	1.14387	5.5613	0.0183618	0.249844					57.2526	1.48225	0.5254	7.08499	0.00777321	NA		30.5667	-0.521934	0.911512	0.319231	0.57207	1
ENSMUSG00000012429	Mplkip	95.5058	-1.52028	0.585288	7.40671	0.00649809	0.10214		80.7386	-0.71326	0.373969	3.55728	0.0592847	0.231988		129.62	-0.625962	0.391496	2.76147	0.0965596	0.526461					65.3151	0.297707	0.279282	1.09876	0.294538	NA		133.675	0.107131	0.344984	0.0969806	0.755484	1
ENSMUSG00000012443	Kif11	18.6988	2.65239	2.14405	0.645982	0.421553	0.770745		19.1608	1.44289	0.582005	6.21566	0.0126625	0.0886767		10.4792	-0.461902	1.30867	0.0709537	0.789953	0.969417					20.3655	-0.165221	0.363775	0.181948	0.669705	NA		13.6929	0.967884	0.815415	1.43074	0.231644	1
ENSMUSG00000012483	Rpa3	125.3	-0.675132	0.662866	0.935084	0.333545	0.705018		125.255	-0.619655	0.333761	3.41975	0.0644208	0.243618		157.8	-0.464218	0.510795	0.773944	0.379	0.824954					122.084	0.423997	0.323204	1.5694	0.210294	0.654801		179.977	0.532234	0.427731	1.58114	0.208596	1
ENSMUSG00000012519	Mlkl	2.41092	5.32549	4.36739	0.956235	0.328137	NA		3.22748	0.303293	1.22822	0.036349	0.848796	NA		2.13522	3.83758	2.34587	1.9353	0.16418	NA					4.49459	0.981287	0.910472	0.966158	0.32564	NA		8.58272	2.16291	0.811492	7.49453	0.00618866	1
ENSMUSG00000012535	Tnpo3	297.827	-0.461075	0.469215	1.04076	0.307644	0.680127		259.556	-0.710492	0.3696	3.56589	0.0589782	0.231366		416.938	0.182738	0.517317	0.139958	0.708323	0.950301				TNPO3	195.639	0.544621	0.223991	5.73538	0.0166264	0.293942		464.936	0.000795698	0.448312	3.27013e-06	0.998557	1
ENSMUSG00000012609	Ttll5	25.1329	-0.849939	1.09663	0.615932	0.432563	0.776488		32.5068	0.298367	0.441809	0.459285	0.497958	0.734883		32.4831	-0.56847	0.575705	0.933613	0.333926	0.793701					28.7467	-0.331321	0.340713	0.966169	0.325638	NA		33.1099	-0.142925	0.492828	0.0825409	0.773883	1
ENSMUSG00000012640	Zfp715	71.0506	-0.741508	0.761515	0.990529	0.319613	0.692391		89.2712	-0.373756	0.369998	1.02921	0.310343	0.58239		104.048	-0.305271	0.414216	0.501242	0.478955	0.876673					86.5515	0.221912	0.220185	1.00232	0.316749	NA		114.634	0.0328209	0.345366	0.00897725	0.924515	1
ENSMUSG00000012705	Retn	2.9699	1.65425	2.59011	0.412565	0.520671	NA		6.89946	0.00226775	1.0414	4.9434e-06	0.998226	1		4.77072	1.2425	1.34182	0.670709	0.412805	0.843651					6.63782	-0.304948	0.788661	0.117813	0.731419	NA		5.48024	0.111527	1.31611	0.00675584	0.934493	1
ENSMUSG00000012819	Cdh23	40.9243	-1.2222	1.00363	1.61537	0.203738	0.582129		67.767	-0.281218	0.463485	0.37472	0.540443	0.765029		68.7129	-0.324138	0.585714	0.26392	0.60744	0.923423					63.6039	0.17836	0.289849	0.377026	0.539199	NA		75.6795	0.0114686	0.484514	0.000552868	0.981241	1
ENSMUSG00000012848	Rps5	17571.4	-0.0108101	0.444842	0.00053486	0.981549	0.996306		16879.9	-0.357786	0.209462	2.9084	0.0881193	0.291324		22353.6	-0.0588443	0.34861	0.0266962	0.870212	0.980474					15695.6	0.359642	0.184333	3.71475	0.0539336	0.4162		27564	0.366905	0.256986	2.08835	0.148427	1
ENSMUSG00000012889	Podnl1	17.7312	0.794507	1.41548	0.329527	0.565937	0.84981		22.4184	2.26355	0.577647	15.518	8.17244e-05	0.00222479		8.63814	-0.421003	0.98161	0.200641	0.654204	0.934586	B				31.4452	0.200383	0.395409	0.250291	0.61687	NA		15.4182	0.49417	0.670927	0.550062	0.458292	1
ENSMUSG00000013033	Adgrl1	43.297	5.42276	1.47909	7.83942	0.00511189	0.0905989		45.9773	1.26401	0.600856	4.42451	0.0354262	0.170228		43.1604	2.2443	1.00099	2.71886	0.099169	0.531807					38.8511	-0.41224	0.414571	0.985486	0.320848	NA		51.0602	-0.237891	0.57012	0.171868	0.678457	1
ENSMUSG00000013076	Amotl1	16.9971	-0.856444	1.43607	0.296075	0.586354	0.857662		16.0157	-0.930154	1.06219	0.719764	0.396221	0.659166		19.7344	-0.0846906	1.0823	0.0064995	0.935745	0.993074					11.8917	0.0128369	0.880749	0.000206852	0.988525	NA		17.7407	-0.43179	0.871022	0.237088	0.626317	1
ENSMUSG00000013089	Etv5	14.8582	3.54577	1.94178	1.75542	0.185197	0.56142		29.8492	0.843544	0.483888	3.101	0.0782441	0.270864		20.9113	1.619	1.10114	1.322	0.250234	0.732712					24.3227	-0.73014	0.326031	5.17387	0.022929	NA		21.2738	-1.39346	0.730896	3.33905	0.0676536	1
ENSMUSG00000013150	Gfod2	5.41518	-1.34432	3.18747	0.141478	0.706816	NA		5.76762	-1.36879	0.914869	2.15824	0.141807	0.384805		7.20846	0.312997	1.08644	0.0892864	0.765086	0.964525					4.06628	-0.0410827	0.691487	0.00328069	0.954324	NA		8.5126	0.287116	0.859054	0.114049	0.735581	1
ENSMUSG00000013155	Enkd1	8.18836	6.91758	2.63729	5.92164	0.0149561	0.165257		4.10938	-0.593332	1.40254	0.175698	0.675097	0.847165		3.85709	3.29036	2.02127	2.06813	0.150406	NA					4.12552	0.145724	0.952212	0.0202184	0.886929	NA		5.54771	-1.61809	1.4244	1.19807	0.273707	1
ENSMUSG00000013160	Atp6v0d1	1450.06	1.88768	0.447474	14.3286	0.000153514	0.00963204		2405.48	1.41252	0.32513	18.7195	1.51426e-05	0.000555117		1157.4	0.462356	0.502807	0.740508	0.389498	0.833538	C				2219.08	-0.722954	0.218256	11.3778	0.000743265	0.0834226		1295.9	-0.409405	0.376829	1.14099	0.285444	1
ENSMUSG00000013236	Ptprs	14.3971	-1.32164	1.43716	0.819601	0.365297	0.731324		13.6608	-1.28751	0.728238	2.97146	0.0847455	0.285195		18.8921	0.773192	0.960258	0.701701	0.402213	0.83823					10.6909	0.901692	0.614363	2.07037	0.150185	NA		25.1871	0.351666	0.670507	0.28143	0.595766	1
ENSMUSG00000013275	Slc41a1	25.1657	0.0775664	1.03325	0.00538222	0.941517	0.986701		28.8286	-0.140704	0.680585	0.0433038	0.835154	0.928605		27.4379	0.169313	0.64712	0.0685791	0.793417	0.969495					23.6115	-0.160532	0.455426	0.116553	0.732804	NA		37.2216	-0.595453	0.494561	1.41339	0.234494	1
ENSMUSG00000013465	Nelfb	233.087	-1.58852	0.613664	8.22034	0.00414233	0.0804138		208.643	-0.146961	0.252684	0.335403	0.562495	0.779127		280.238	-0.568442	0.491491	1.63927	0.200425	0.687932					162.355	-0.0797935	0.250442	0.100083	0.75173	0.943465		261.393	-0.0924161	0.363847	0.0641466	0.800058	1
ENSMUSG00000013495	Tmem175	24.6672	-1.02977	1.35744	0.736529	0.390775	0.749342		24.5265	-0.14189	0.500886	0.0820578	0.774528	0.900967		33.2577	-0.484972	0.671925	0.561185	0.453783	0.862681					18.5055	-0.140653	0.490017	0.0833159	0.772853	NA		35.3284	0.129115	0.453358	0.0821814	0.774363	1
ENSMUSG00000013523	Bcas1	27.2084	-2.14452	2.15339	1.62979	0.201732	0.579397		28.6357	-1.94068	0.714933	5.69352	0.0170277	0.107574		42.1694	1.42254	1.17656	1.35497	0.244411	0.729695					13.6911	-1.32218	0.779085	1.86865	0.171629	NA		32.0612	-0.826982	0.778817	1.05897	0.30345	1
ENSMUSG00000013539	Tango2	116.768	0.278439	0.671212	0.169196	0.680827	0.896698		142.019	-0.37775	0.285181	1.75802	0.184872	0.442912		166.011	0.334647	0.370223	0.741467	0.389191	0.833538					135.576	0.272792	0.236047	1.29499	0.25513	0.694034		211.256	0.338392	0.298769	1.30899	0.252578	1
ENSMUSG00000013593	Ndufs2	445.683	0.667237	0.563725	1.20189	0.272945	0.649088		459.215	-0.18312	0.217099	0.69898	0.403127	0.664921		494.729	0.332132	0.345591	0.887887	0.346051	0.804595		ENSMUSG00000013593			411.82	0.1302	0.180441	0.511149	0.474642	0.834861		595.944	-0.4214	0.25587	2.62619	0.105114	1
ENSMUSG00000013611	Snx31	10.8928	0.246045	1.50811	0.0271907	0.869026	0.967232		23.5106	-2.88898	0.893098	7.41497	0.00646835	0.0566234		39.4723	2.19161	0.713451	9.63683	0.00190714	0.0783355					7.85436	-0.420625	0.822077	0.140453	0.707831	NA		37.4083	-0.701702	0.67683	1.01452	0.313823	1
ENSMUSG00000013622	Atraid	90.7058	1.28587	0.614587	4.18245	0.0408447	0.279331		103.792	-0.260243	0.247894	1.08513	0.297553	0.570808		114.501	1.1196	0.35749	9.57457	0.00197291	0.0798407					91.4027	0.305081	0.236172	1.66158	0.19739	NA		174.907	0.148382	0.269251	0.307148	0.579435	1
ENSMUSG00000013629	Cad	98.5151	-0.285663	0.90094	0.115707	0.733738	0.917192		91.3863	-1.02125	0.469503	4.55426	0.0328369	0.162783		126.297	0.27556	0.598187	0.224317	0.63577	0.929611					66.2828	0.376408	0.382206	0.862162	0.353134	NA		143.535	-0.4577	0.39469	1.30326	0.253618	1
ENSMUSG00000013646	Sh3bp5l	138.9	-1.77919	0.786272	6.343	0.0117845	0.142828		212.627	0.238951	0.282976	0.697842	0.40351	0.665272		230.182	0.330759	0.609232	0.350316	0.553934	0.908846					170.953	-0.0400674	0.248875	0.0245819	0.875413	0.968059		249.72	0.109006	0.37049	0.0873588	0.767562	1
ENSMUSG00000013662	Atad1	174.568	-0.594152	0.498734	1.53655	0.215132	0.596104		175.59	-0.634145	0.222432	7.8971	0.00495142	0.0472848		255.141	0.055384	0.293586	0.0371175	0.847226	0.97464	B				134.347	0.294796	0.178544	2.69861	0.100436	0.508543		270.249	-0.185535	0.287439	0.409341	0.522304	1
ENSMUSG00000013663	Pten	706.313	-0.595292	0.447314	1.98044	0.159344	0.529263		546.8	0.0555594	0.235084	0.0556629	0.813487	0.918682		748.915	-0.667822	0.356012	4.02125	0.0449305	0.379574					539.307	0.297951	0.156259	3.57641	0.0586058	0.421004		677.92	-0.241947	0.265412	0.816808	0.366115	1
ENSMUSG00000013698	Pea15a	260.145	-0.353318	0.490499	0.513686	0.473547	0.799532		356.325	-0.984217	0.258876	13.9742	0.000185341	0.00428427		456.322	0.481905	0.386387	1.41567	0.234118	0.721785	B				248.446	0.0316608	0.191307	0.0269778	0.869535	0.965821		476.129	-0.42558	0.300429	1.93509	0.164202	1
ENSMUSG00000013701	Timm23	65.0396	1.01347	0.715465	1.74175	0.186917	0.563599		114.056	0.842445	0.271351	9.62978	0.00191448	0.0244469		59.8576	0.441783	0.428729	1.05452	0.304469	0.774273	B				120.375	-0.202958	0.302606	0.453998	0.500442	0.847275		89.3336	0.445694	0.336737	1.79657	0.180128	1
ENSMUSG00000013707	Tnfaip8l2	144.912	0.712756	0.693206	1.10019	0.294224	0.668608		134.368	-0.263919	0.381008	0.469635	0.493155	0.731773		194.501	0.479846	0.604247	0.604658	0.436806	0.854522					112.584	0.419246	0.234669	3.12145	0.077268	0.467846		239.72	0.375305	0.439652	0.74822	0.38704	1
ENSMUSG00000013736	Trnt1	44.9618	1.00489	0.879928	1.07559	0.299685	0.673686		47.6788	0.184912	0.409634	0.208287	0.648114	0.831787		49.4047	0.450702	0.48331	0.824638	0.363828	0.816938					50.2582	0.352682	0.301209	1.36178	0.243229	NA		59.463	0.239607	0.367527	0.431718	0.511147	1
ENSMUSG00000013766	Ly6g6e	4.73538	6.23729	4.32007	1.16045	0.281372	NA		6.14119	-2.61095	1.39188	3.02865	0.081806	0.278706		7.12747	6.40054	2.10331	8.33242	0.00389437	0.115582					2.77685	-0.710323	1.27245	0.32817	0.566739	NA		7.96656	-0.204897	1.50662	0.0136885	0.906862	1
ENSMUSG00000013787	Ehmt2	203.809	-1.16359	0.740519	3.05395	0.080541	0.390007		229.056	-0.10246	0.325457	0.0983348	0.753837	0.888308		286.86	-0.104341	0.530674	0.0438335	0.834164	0.973988					150.917	-0.434301	0.276577	2.54036	0.11097	0.527989		298.916	-0.369865	0.405546	0.808622	0.368528	1
ENSMUSG00000013822	Elof1	199.03	0.299938	0.470059	0.406121	0.523945	0.828354		207.607	0.0087577	0.270717	0.00102055	0.974515	0.992152		244.315	0.315146	0.365969	0.779575	0.377271	0.823034					171.928	0.0853455	0.191993	0.197609	0.656658	0.915094		296.56	0.269354	0.274638	0.981193	0.321905	1
ENSMUSG00000013833	Med16	175.198	0.62624	0.506571	1.38759	0.238813	0.619516		294.798	0.629078	0.328976	3.71151	0.0540383	0.218659		209.893	0.542062	0.359542	2.12116	0.145277	0.618224					278.373	-0.317476	0.252464	1.59696	0.206335	0.651482		291.604	-0.0035387	0.287559	0.000151313	0.990186	1
ENSMUSG00000013846	St3gal1	1201.38	0.296966	0.367437	0.633215	0.426179	0.774289		1826.29	0.260917	0.344575	0.584376	0.444602	0.697616		1612.55	0.119595	0.538334	0.0404521	0.840599	0.974417				ST3GAL1	1650.2	-0.258987	0.17968	2.09299	0.147976	0.590152		1876.76	-0.415988	0.40557	1.01406	0.313932	1
ENSMUSG00000013858	Tmem259	3.13277	0.16917	2.98335	0.00254262	0.959784	NA		3.17376	0.918582	1.14792	0.635418	0.425375	NA		3.39514	0.226878	1.5463	0.0205801	0.885929	NA					2.05094	0.0233983	1.34504	0.000607003	0.980344	NA		4.99053	0.291809	1.08871	0.072085	0.788325	1
ENSMUSG00000013878	Rnf170	29.9219	2.09512	1.61867	0.800269	0.371013	0.734552		27.1823	-0.4388	0.51207	0.714301	0.39802	0.660629		31.3736	0.90804	0.894255	0.730767	0.392635	0.83555					21.761	0.112042	0.445304	0.0595688	0.807179	NA		40.0875	-0.0894515	0.482017	0.0341059	0.853482	1
ENSMUSG00000013936	Myl2	5.68491	-5.05527	3.16445	2.69658	0.100564	NA		0.818609	-3.46742	3.37647	1.19723	0.273876	NA		5.25419	-1.82782	1.96147	1.09917	0.294449	0.767564					0.429947	1.83421	3.08911	0.451777	0.501492	NA		2.30575	0.813689	2.29218	0.128317	0.720184	1
ENSMUSG00000013974	Mcemp1	437.066	-0.739944	0.480217	2.61508	0.105852	0.442855		643.45	1.15737	0.379944	9.42337	0.00214238	0.0264374		494.919	-0.586202	0.455631	1.84728	0.1741	0.656275	B				1109.86	0.912975	0.277084	9.85317	0.00169539	0.114173		583.091	-0.11698	0.363445	0.102761	0.748541	1
ENSMUSG00000013997	Nit1	29.2262	0.754874	0.972306	0.581508	0.445722	0.782814		32.3177	-0.194142	0.338676	0.331997	0.564486	0.780222		39.4439	0.380643	0.525331	0.440464	0.506899	0.893223					27.2184	0.0529309	0.30284	0.029757	0.863043	NA		40.5335	0.293286	0.457398	0.414293	0.519798	1
ENSMUSG00000014030	Pax5	915.324	0.450398	0.391549	1.32662	0.249407	0.627184		827.509	-0.0973511	0.390509	0.0602888	0.80604	0.915595		1095.79	0.18506	0.308636	0.363931	0.546331	0.90711					519.102	-0.492148	0.346382	2.0596	0.15125	0.592678		1201.33	-0.222432	0.279876	0.620968	0.430688	1
ENSMUSG00000014039	Prdm15	18.4753	-0.569172	1.35114	0.210259	0.646564	0.883346		24.8841	0.742686	0.498232	2.21675	0.13652	0.376272		23.9023	-0.419621	0.788109	0.283177	0.594626	0.920648					18.7255	-1.09293	0.414649	6.89385	0.00864928	NA		19.5067	-1.63958	0.688079	5.24173	0.0220513	1
ENSMUSG00000014074	Rnf168	132.776	0.191926	0.649024	0.0782817	0.77964	0.935552		105.401	-0.425346	0.299604	1.98119	0.159265	0.408472		141.271	-0.113587	0.398456	0.0808038	0.776211	0.967054					90.7664	0.217935	0.217451	0.990485	0.319624	NA		184.14	0.88693	0.349526	6.72739	0.00949432	1
ENSMUSG00000014075	Tctex1d2	69.8665	-0.788857	0.851416	0.818727	0.365553	0.731324		48.0236	-0.832411	0.460329	3.25898	0.0710335	0.256894		78.7029	-0.592629	0.564446	1.19103	0.275121	0.75355					52.0154	0.964291	0.328783	8.08534	0.00446246	NA		87.4578	0.382426	0.488293	0.62559	0.428978	1
ENSMUSG00000014077	Chp1	7657.8	0.6379	0.503744	1.35233	0.244871	0.62334		13325.2	0.98448	0.317216	9.83941	0.00170812	0.0224236		7800.81	-0.0645161	0.423547	0.0208865	0.885088	0.982979	B				14560.3	-0.194607	0.259382	0.575473	0.448092	0.822575		9241.54	-0.222429	0.32882	0.449672	0.502491	1
ENSMUSG00000014164	Klhl3	9.79083	-0.655759	2.22229	0.119284	0.729812	0.915006		8.04228	0.500505	0.823594	0.375415	0.540067	0.765029		9.48114	-1.00957	1.07357	1.0123	0.314352	0.780773					7.63971	-0.127676	0.649611	0.0373691	0.846715	NA		7.53576	-0.103063	0.930945	0.0119799	0.912843	1
ENSMUSG00000014177	Tvp23b	59.3261	0.243811	0.935732	0.0519804	0.819652	0.952364		65.8442	-0.669629	0.297916	4.84976	0.02765	0.145324		89.1747	0.685598	0.511146	1.67749	0.195259	0.682105					51.4088	0.365538	0.237543	2.31579	0.128066	NA		93.4022	-0.262245	0.347376	0.557994	0.455069	1
ENSMUSG00000014195	Dnajc7	237.131	-0.481541	0.547458	0.870321	0.350866	0.718597		318.568	-0.616523	0.357506	2.88976	0.089144	0.292851		432.348	0.693737	0.531743	1.80082	0.179613	0.663212					204.355	0.17706	0.304438	0.320959	0.571032	0.886436		542.839	0.321123	0.43224	0.564587	0.452418	1
ENSMUSG00000014226	Cacybp	200.277	-0.168104	0.545925	0.0887984	0.76571	0.929987		228.208	-0.496298	0.258609	3.59359	0.0580027	0.228911		283.452	0.205263	0.330442	0.375224	0.540171	0.905527					182.541	-0.0418404	0.236497	0.0294213	0.86381	0.965329		301.27	-0.00208717	0.294894	4.99192e-05	0.994363	1
ENSMUSG00000014232	Cluap1	48.0202	-1.18239	0.821752	2.16832	0.14088	0.502636		35.0717	-0.0360774	0.43998	0.00668401	0.934841	0.975908		51.2417	-1.07565	0.494655	5.1538	0.0231956	0.277854					27.1576	-0.357146	0.407674	0.770493	0.380064	NA		50.1486	0.578962	0.402085	2.15058	0.142516	1
ENSMUSG00000014243	Zswim7	24.3918	-0.559941	1.04662	0.264061	0.607344	0.866349		36.4057	-0.163918	0.450129	0.129127	0.719339	0.87118		38.1897	0.425734	0.624952	0.51611	0.472506	0.87256					23.4094	-0.955668	0.373858	6.10647	0.0134688	NA		35.7654	-1.11071	0.767727	1.90437	0.16759	1
ENSMUSG00000014245	Pigl	30.9878	0.369458	1.23996	0.0968967	0.755586	0.92534		31.3863	0.184317	0.550492	0.114623	0.734942	0.878512		37.7194	-0.415294	0.697245	0.268918	0.604058	0.922511					22.5489	-0.648563	0.387239	2.85096	0.0913193	NA		37.3031	0.0210821	0.56273	0.00136938	0.970481	1
ENSMUSG00000014294	Ndufa2	2055.76	-0.0514064	0.461868	0.011192	0.915747	0.978548		2464.6	0.278539	0.241946	1.34274	0.246552	0.517518		2643.69	-0.109169	0.37911	0.0747947	0.78448	0.969278		ENSMUSG00000014294			2438.63	0.133785	0.224759	0.346322	0.556202	0.877934		3116.35	0.442108	0.292902	2.3387	0.126195	1
ENSMUSG00000014301	Pam16	132.624	1.0376	1.35138	0.271078	0.602609	0.864525		201.804	0.913186	0.413617	5.00262	0.025309	0.137227		133.476	0.2007	0.809232	0.045792	0.830554	0.973226					219.266	-0.0957306	0.310724	0.0961412	0.75651	0.944277		171.183	0.428193	0.354769	1.49114	0.222039	1
ENSMUSG00000014313	Cox6c	18160.7	-0.135126	0.50772	0.0633994	0.801202	0.945013		23795	0.152871	0.353807	0.189996	0.66292	0.841045		19410.3	-0.278489	0.435814	0.381346	0.536884	0.903401		ENSMUSG00000014313			26634.1	0.241869	0.264755	0.803387	0.370083	0.779555		22085.9	0.470194	0.387216	1.50772	0.219488	1
ENSMUSG00000014329	Bicc1	3.68688	2.88711	2.68573	0.725443	0.394364	NA		2.51845	-0.987736	1.59412	0.409504	0.522221	NA		3.19238	2.62211	2.00053	1.54654	0.213647	NA					1.89777	0.542469	1.22212	0.271349	0.602428	NA		3.02471	-0.968656	1.61051	0.364566	0.545981	1
ENSMUSG00000014349	Ube2z	116.549	0.708961	0.615945	1.18247	0.276853	0.6532		147.485	0.208591	0.260614	0.631732	0.426721	0.683256		142.817	0.415838	0.396398	1.04323	0.307071	0.775577					138	0.00805533	0.196253	0.00168158	0.96729	0.992341		193.077	-0.130751	0.317765	0.168205	0.681712	1
ENSMUSG00000014353	Tmem87b	30.9291	-0.617342	1.31213	0.266624	0.605605	0.865585		22.0987	-0.714864	0.525821	1.79828	0.179921	0.436643		36.0569	-0.392834	0.737208	0.335646	0.562353	0.911124					18.5149	0.388358	0.386794	0.979135	0.322412	NA		41.8219	-0.0160335	0.547259	0.000862494	0.976571	1
ENSMUSG00000014355	Anapc1	77.5923	-0.376073	0.638823	0.364001	0.546292	0.841218		68.9049	-0.0735349	0.286183	0.0655326	0.797956	0.912592		89.3724	-0.362294	0.357547	1.08903	0.296687	0.769287					59.2086	0.0529552	0.23788	0.0489	0.824989	NA		97.4004	0.0185021	0.314142	0.00347901	0.952966	1
ENSMUSG00000014361	Mertk	2.31732	3.84629	5.73126	0.0677953	0.794574	NA		2.84939	-1.87171	1.97477	0.619915	0.431079	NA		5.21763	2.21805	2.57699	0.493019	0.482584	0.878491					3.08317	2.4428	1.24974	3.23559	0.0720543	NA		4.1533	-2.37608	1.81075	1.45612	0.227548	1
ENSMUSG00000014402	Tsg101	423.211	1.73427	0.555726	8.28718	0.00399258	0.0783846		697.902	0.986463	0.277908	12.6852	0.000368558	0.00710524		365.572	0.399194	0.361655	1.08788	0.296942	0.769287	B				697.01	-0.386464	0.238119	2.71464	0.0994311	0.508497		404.889	-0.159179	0.271169	0.340531	0.559523	1
ENSMUSG00000014418	Hps5	22.5823	0.91814	1.11456	0.673404	0.411867	0.765926		29.3709	-0.978636	0.493674	3.7467	0.052912	0.216108		39.0615	1.16178	0.604725	3.34522	0.0674006	0.453763					25.2144	0.611213	0.385804	2.44848	0.117639	NA		46.8449	-0.397996	0.444889	0.782314	0.376434	1
ENSMUSG00000014426	Map3k4	89.4147	-0.795455	0.706569	1.48013	0.223754	0.605643		83.1182	-0.409651	0.303424	1.76275	0.184282	0.442087		116.393	-0.200261	0.4286	0.244422	0.62103	0.926089					66.0301	0.288367	0.286634	0.916726	0.338336	NA		121.377	-0.405593	0.297003	1.82469	0.176756	1
ENSMUSG00000014453	Blk	192.019	-0.352461	0.553965	0.445914	0.504282	0.81741		210.143	-1.12491	0.323419	11.2973	0.000776189	0.0125736		321.552	0.510418	0.388571	1.78513	0.18152	0.667455	B				106.74	-0.271768	0.371922	0.50553	0.47708	NA		368.239	-0.237678	0.272743	0.74761	0.387234	1
ENSMUSG00000014470	Rnf166	173.325	0.215949	0.543892	0.161159	0.688092	0.899513		160.156	0.69198	0.255292	7.28007	0.00697239	0.0594843		151.782	-0.452946	0.370764	1.60917	0.204608	0.693836					148.559	-0.157468	0.2482	0.377461	0.538965	0.870639		185.9	0.302882	0.297927	1.05036	0.305425	1
ENSMUSG00000014496	Ankrd28	710.568	-1.35372	0.380774	13.776	0.000205956	0.0117346		833.763	0.0786946	0.299904	0.0702521	0.79097	0.909676		978.673	-0.796978	0.419031	3.37418	0.0662257	0.451504	A				859.571	0.236061	0.181443	1.67104	0.19612	0.643423		956.217	0.246474	0.350909	0.499469	0.479733	1
ENSMUSG00000014498	Ankrd52	3.11001	6.35934	3.62167	2.43945	0.118317	NA		4.54338	1.34964	1.18631	1.12365	0.289133	0.562727		3.87662	3.5131	2.30645	1.94151	0.163504	NA					3.43662	-0.695068	0.885374	0.571501	0.449663	NA		4.54855	0.212685	1.35118	0.0248703	0.874691	1
ENSMUSG00000014503	Pkd2l2	35.9097	0.793844	1.01758	0.604927	0.436704	0.777935		27.6837	0.437748	0.584262	0.568243	0.450958	0.70295		31.3879	-0.763574	0.907062	0.600234	0.438489	0.854898					22.9124	-0.807379	0.444842	3.22082	0.072707	NA		31.2117	0.356161	0.713468	0.248021	0.618472	1
ENSMUSG00000014504	Srp19	306.952	-0.604415	0.447218	1.85985	0.172643	0.547097		315.508	-0.70307	0.27001	6.55437	0.0104627	0.0784346		437.624	0.132146	0.408646	0.112435	0.737389	0.956137					261.04	0.319517	0.195944	2.56903	0.108975	0.526815		523.433	0.310333	0.30463	1.0613	0.302919	1
ENSMUSG00000014543	Klra17	61.5487	0.0505286	1.22698	0.00200927	0.964247	0.991694		75.5928	1.66705	0.533177	9.99593	0.00156886	0.021228		40.732	-1.67192	0.912803	3.79833	0.0513037	0.402117	B				137.263	0.831778	0.317425	6.57639	0.010334	0.233731		26.3059	-0.153784	0.686277	0.0500595	0.82296	1
ENSMUSG00000014547	Wdfy2	169.154	-0.000297965	0.6171	3.30029e-07	0.999542	1		167.705	0.259345	0.263019	0.969072	0.324912	0.596232		166.823	-0.173007	0.420829	0.193481	0.660035	0.935813					146.142	-0.207491	0.230063	0.807883	0.368747	0.779524		200.817	-0.0263128	0.292236	0.00810874	0.928249	1
ENSMUSG00000014550	Rbsn	28.267	3.9152	1.08434	10.139	0.00145163	0.0423423		45.0962	-0.329699	0.333059	0.962575	0.326539	0.597445		43.0392	2.866	0.598251	17.3387	3.12753e-05	0.00524345	D				40.0793	0.207308	0.247325	0.683058	0.408536	NA		59.9285	-0.000427923	0.338731	1.59841e-06	0.998991	1
ENSMUSG00000014551	Mrps25	56.967	1.39532	0.731808	3.18694	0.0742287	0.378226		52.1389	0.233453	0.317271	0.525901	0.468335	0.715804		59.3377	0.51203	0.416149	1.47623	0.224366	0.713503					55.1444	0.507747	0.274659	3.28494	0.0699181	NA		85.7215	0.608477	0.350239	3.12704	0.0770033	1
ENSMUSG00000014554	Dguok	126.699	0.13263	0.553794	0.0542717	0.81579	0.950395		173.722	0.281915	0.345193	0.663062	0.415481	0.675031		132.206	-0.343319	0.376464	0.807574	0.368838	0.818476					160.57	-0.287498	0.249028	1.35344	0.244677	0.691491		173.92	-0.0657127	0.346244	0.0358029	0.849923	1
ENSMUSG00000014592	Camta1	137.715	0.463666	0.617114	0.533025	0.465338	0.795686		171.631	0.236066	0.345249	0.476437	0.49004	0.729866		153.31	-0.322788	0.543698	0.282806	0.594868	0.920648					145.173	-0.506191	0.209339	5.9438	0.0147691	0.275974		145.142	0.268293	0.392105	0.470374	0.492815	1
ENSMUSG00000014599	Csf1	36.355	-0.19806	0.897683	0.0524557	0.818844	0.952267		33.4574	-0.384422	0.47623	0.63586	0.425214	0.682057		39.7524	-0.446036	0.584296	0.613529	0.433462	0.853162		ENSMUSG00000014599			33.3088	0.320776	0.359241	0.757599	0.384081	NA		41.6419	-0.142544	0.503805	0.0792429	0.778326	1
ENSMUSG00000014601	Strip1	207.684	0.356376	0.610687	0.361261	0.547807	0.841916		275.634	0.213001	0.238119	0.799791	0.371156	0.637222		250.367	0.251042	0.403234	0.398477	0.527877	0.901328					242.762	-0.208258	0.149661	1.94296	0.163348	0.604887		292.913	-0.354473	0.268589	1.70171	0.192064	1
ENSMUSG00000014606	Slc25a11	219.239	0.0402244	0.554489	0.00553446	0.940697	0.986602		276.467	0.0451942	0.340713	0.0174186	0.895001	0.955833		314.201	0.558934	0.480013	1.41948	0.233489	0.721417					226.924	0.126371	0.210579	0.361333	0.547767	0.874252		381.65	-0.107633	0.355778	0.0909484	0.762975	1
ENSMUSG00000014633	Cmc2	86.8242	-0.0575063	0.655583	0.00718134	0.932466	0.984131		92.9465	0.340488	0.391784	0.768873	0.380566	0.645908		88.8492	-0.237961	0.452767	0.284352	0.593863	0.920648					87.5875	-0.0559044	0.263455	0.0450092	0.831987	NA		98.2981	-0.00952187	0.345481	0.000755207	0.978076	1
ENSMUSG00000014668	Chfr	219.201	-0.69487	0.683143	1.20597	0.272133	0.648968		276.613	0.693822	0.238111	8.54102	0.00347231	0.0370535		237.446	-0.521718	0.450953	1.54136	0.214416	0.703656	B				257.053	-0.306221	0.207	2.2295	0.135398	0.565356		226.163	-0.139293	0.274599	0.254882	0.613658	1
ENSMUSG00000014725	Adam28	10.0287	4.14247	2.54469	1.86462	0.172093	0.546391		9.69469	-2.54888	0.905948	6.71825	0.00954314	0.07365		14.2767	5.14439	1.39261	16.4951	4.87751e-05	0.00751796	F				4.52002	0.69105	0.87166	0.849782	0.356614	NA		15.5199	-0.390435	0.898926	0.193799	0.659774	1
ENSMUSG00000014748	Tex261	490.761	-0.201949	0.434155	0.227944	0.633053	0.877623		470.635	0.127671	0.251358	0.252613	0.615241	0.815245		537.236	0.00377091	0.426516	8.89228e-05	0.992476	0.999459					392.535	-0.01341	0.185368	0.00519107	0.942563	0.987352		593.985	-0.289565	0.29828	0.922155	0.33691	1
ENSMUSG00000014763	Fam120b	55.1575	1.63662	0.884039	3.28929	0.0697334	0.368166		66.725	-0.09415	0.46003	0.041337	0.838889	0.930512		75.5319	1.06503	0.492406	4.26804	0.0388358	0.358507					66.9861	0.323905	0.28644	1.25188	0.263194	NA		97.0221	-0.19262	0.4449	0.185062	0.667059	1
ENSMUSG00000014767	Tbp	21.7703	-0.835783	1.20368	0.465035	0.49528	0.810233		43.5653	-0.00680714	0.502465	0.000184563	0.989161	0.998455		40.1117	0.661431	0.687235	0.958865	0.327473	0.789692					38.2058	-0.0623921	0.333294	0.0356404	0.85026	NA		57.0714	-0.00216983	0.44559	2.37643e-05	0.99611	1
ENSMUSG00000014769	Psmb1	1376.19	-1.17669	0.394355	9.97987	0.00158261	0.0443893		1461.5	-0.624437	0.256172	5.85391	0.0155425	0.101694		2067.77	-0.0115755	0.393271	0.000944771	0.975479	0.997145	A	ENSMUSG00000014769			1258.53	0.463152	0.187392	5.8445	0.0156258	0.286615		2359.99	0.177866	0.287024	0.388781	0.532941	1
ENSMUSG00000014778	Fhod1	378.904	-1.06035	0.873849	1.83639	0.175374	0.550759		372.969	-0.464785	0.341848	1.86103	0.172506	0.426115		537.934	-0.145987	0.574798	0.070997	0.789891	0.969417					324.535	0.472546	0.214629	4.67559	0.0305943	0.347787		557.458	-0.335611	0.361238	0.84066	0.359208	1
ENSMUSG00000014786	Slc9a5	9.0605	-4.37103	2.54401	3.46474	0.0626903	0.348112		8.76529	-0.91853	0.830375	1.21882	0.269593	0.542236		16.4986	-0.898228	0.793103	1.37147	0.241559	0.726523					7.12342	1.18745	0.865906	1.615	0.20379	NA		26.1474	0.594768	0.828957	0.532846	0.465413	1
ENSMUSG00000014791	Elmo3	6.25247	-0.0128411	2.98069	0.000194243	0.98888	NA		8.44313	-0.787087	0.793847	0.96573	0.325747	0.596729		7.82203	2.0507	1.29076	1.88102	0.170219	0.652098					6.46504	-0.0590534	0.696745	0.00688436	0.933874	NA		9.20583	-0.457277	0.883019	0.263825	0.607505	1
ENSMUSG00000014846	Tppp3	356.034	0.263562	0.549212	0.210807	0.646136	0.883156		304.289	0.376904	0.287545	1.69316	0.193185	0.453842		297.747	0.0400419	0.472377	0.00808719	0.928344	0.991872					352.251	0.394848	0.248868	2.4278	0.1192	0.541801		315.369	-0.157936	0.292661	0.288109	0.591435	1
ENSMUSG00000014850	Msh3	100.62	-0.863959	0.772276	1.28531	0.256915	0.633872		79.6858	0.0223997	0.285801	0.00618485	0.937316	0.976481		101.771	-1.19238	0.441165	7.6502	0.0056766	0.140994					69.7883	-0.302379	0.290406	1.01238	0.314334	NA		89.6036	0.259581	0.399762	0.428764	0.512596	1
ENSMUSG00000014856	Tmem208	150.416	-1.01007	0.568844	3.06341	0.0800735	0.389351		156.936	-0.117595	0.388387	0.0909319	0.762996	0.893252		199.889	-0.169156	0.452738	0.157223	0.691726	0.944043					155.862	0.43969	0.231327	3.45673	0.0629948	0.439286		241.438	0.3889	0.313438	1.57924	0.20887	1
ENSMUSG00000014859	E2f4	60.9098	2.18018	0.933334	3.99885	0.0455313	0.296961		81.7941	0.0469848	0.375232	0.0159405	0.89953	0.958642		77.5501	1.08764	0.601461	2.2153	0.136649	0.6065					65.7433	-0.206598	0.280293	0.549892	0.458362	NA		102.295	0.204219	0.383839	0.286236	0.592643	1
ENSMUSG00000014867	Surf4	135.59	-0.675628	0.807381	0.828409	0.362733	0.729714		132.561	-0.196728	0.262515	0.544559	0.46055	0.709952		164.605	-0.219672	0.488395	0.232425	0.629732	0.928251					100.325	-0.112781	0.206138	0.296317	0.586201	NA		168.596	-0.182866	0.251186	0.524542	0.46891	1
ENSMUSG00000014873	Surf2	3.5976	6.28853	3.41883	3.17334	0.0748491	NA		3.87584	-0.464658	1.00639	0.220507	0.638654	0.827166		5.72287	3.5225	1.83394	1.25717	0.262187	0.742457					3.79645	0.739388	0.677194	1.18025	0.277305	NA		6.35867	-0.412802	1.06568	0.141417	0.706877	1
ENSMUSG00000014905	Dnajb9	137.972	-1.51068	0.580487	7.92338	0.00488001	0.0889215		136.151	-0.395574	0.306564	1.64139	0.200135	0.462175		177.724	-0.643756	0.363012	3.60155	0.0577257	0.428998					114.998	0.0237397	0.220115	0.0116278	0.914129	0.97888		166.615	-0.0848704	0.271523	0.0973069	0.755086	1
ENSMUSG00000014907	Naf1	39.6064	1.39602	0.967576	1.98492	0.158873	0.528682		42.7077	-0.547724	0.334274	2.67429	0.101981	0.316515		44.6268	0.800507	0.529848	2.11338	0.146017	0.619715					31.97	-0.19941	0.372903	0.254966	0.6136	NA		56.0288	-0.380436	0.348108	1.17823	0.277717	1
ENSMUSG00000014956	Ppp1cb	21114.4	-0.321981	0.548631	0.29987	0.583964	0.857298		34014.6	0.439982	0.303058	2.17326	0.140428	0.382551		24598.9	-0.522589	0.431807	1.3144	0.251599	0.732836					34744.4	-0.151354	0.251845	0.367545	0.544346	0.873707		29048.8	0.176285	0.34688	0.260971	0.609454	1
ENSMUSG00000014959	Gorasp2	169.088	-0.409208	0.604523	0.518352	0.471546	0.798809		214.621	-0.271346	0.238497	1.28453	0.257059	0.528519		253.352	0.174612	0.369623	0.222962	0.636792	0.930381					168.625	0.0251099	0.201171	0.0156972	0.900295	0.976079		314.368	-0.292457	0.279556	1.07032	0.300873	1
ENSMUSG00000014980	Tsen15	22.0633	-0.493194	1.21262	0.164512	0.685036	0.898571		24.194	-0.392089	0.429491	0.842197	0.358769	0.62482		25.7851	-0.0954559	0.615422	0.0256093	0.872858	0.981277					18.1706	-0.3334	0.419819	0.603546	0.437228	NA		32.306	-0.313674	0.442219	0.489967	0.483942	1
ENSMUSG00000015002	Efr3a	470.951	-0.318457	0.475177	0.493041	0.482574	0.804387		452.483	-0.473261	0.2448	3.69557	0.054557	0.220015		595.192	-0.215679	0.321985	0.454161	0.500365	0.889229					346.077	-0.0897393	0.183875	0.237897	0.625729	0.905646		589.845	-0.564461	0.230381	5.73487	0.0166313	1
ENSMUSG00000015013	Trappc2l	614.697	1.96549	0.645899	6.55812	0.0104407	0.133567		1095.52	0.415678	0.323063	1.67872	0.195094	0.45617		570.931	0.603528	0.501342	1.08373	0.297866	0.769696					1079.13	-0.242358	0.229889	1.11185	0.29168	0.731371		732.36	0.42554	0.348573	1.5241	0.217	1
ENSMUSG00000015016	Acsf3	11.6954	5.68864	2.18166	3.98136	0.0460064	0.298792		9.63245	0.369857	0.83581	0.189608	0.663243	0.84123		9.75947	2.91841	1.48946	2.92802	0.0870544	0.505986					10.9406	0.481421	0.547666	0.719011	0.396469	NA		12.114	-0.352062	0.971087	0.129716	0.718727	1
ENSMUSG00000015023	Ddx19a	82.8014	1.08347	0.705453	2.3376	0.126284	0.479399		116.288	0.39956	0.288786	1.93598	0.164106	0.414742		102.961	0.532931	0.405299	1.54803	0.213426	0.701933					95.9097	-0.429637	0.305119	2.01955	0.155285	NA		130.99	0.136055	0.340098	0.161563	0.687722	1
ENSMUSG00000015027	Galns	61.2767	-0.565023	0.720081	0.658646	0.417038	0.768855		59.631	0.41999	0.372014	1.29052	0.255952	0.527678		69.2714	-0.560727	0.490582	1.38335	0.239531	0.725125					57.6255	0.0782786	0.28355	0.0764006	0.782236	NA		77.2385	0.15674	0.43329	0.131951	0.716417	1
ENSMUSG00000015053	Gata2	108.616	-0.698489	0.750535	0.9814	0.321854	0.69473		184.571	-0.243466	0.311834	0.617223	0.432081	0.687783		182.68	0.0363365	0.412601	0.00705806	0.933047	0.992637					145.001	-0.296779	0.221083	1.81892	0.177441	0.62144		196.721	-0.0288831	0.358381	0.00646575	0.935911	1
ENSMUSG00000015087	Rabl6	56.8585	2.53975	1.0449	3.78773	0.0516297	0.313322		51.2614	0.495247	0.458748	1.17889	0.277583	0.551219		56.9111	0.719702	0.65231	0.837844	0.360014	0.813817					45.9506	-0.0956253	0.333756	0.0836213	0.772449	NA		64.4528	0.118331	0.351737	0.114008	0.735626	1
ENSMUSG00000015090	Ptgds	0.192487	1.64152	5.90235	0.120268	0.728744	NA		6.0263	-5.87074	1.69508	9.03234	0.00265244	0.0307057		7.23248	6.37231	1.95099	9.32393	0.0022618	0.0856261	B				1.83101	0.135246	1.74285	-0.469367	1	NA		12.0273	1.05613	1.25236	0.750328	0.386372	1
ENSMUSG00000015092	Edf1	1037.94	-0.815351	0.604392	2.13408	0.144057	0.507033		951.331	0.0137152	0.191932	0.00513419	0.942878	0.978676		1084.71	-0.409771	0.443743	1.00823	0.315328	0.781963					890.762	0.115002	0.141044	0.663282	0.415404	0.80851		1136.51	0.0266343	0.221264	0.014533	0.904045	1
ENSMUSG00000015093	Clic3	17.3173	0.077691	2.36322	-0.00930604	1	1		16.7603	-1.29049	1.106	1.25567	0.262473	0.534333		21.2535	2.773	1.48542	3.21294	0.0730582	0.470072					9.57327	0.188763	0.886911	0.0444321	0.833052	NA		30.2793	0.98506	0.933351	1.18626	0.276086	1
ENSMUSG00000015094	Npdc1	4.30557	5.05204	3.16019	1.31159	0.252107	NA		10.7606	-2.77746	1.81538	2.08225	0.149021	0.394594		10.8824	5.66679	2.0815	5.04675	0.0246722	0.286277					4.49259	-0.651758	1.12637	0.155614	0.693227	NA		10.8287	-1.18698	1.1995	0.896359	0.34376	1
ENSMUSG00000015095	Fbxw5	89.9086	0.762353	0.634762	1.32162	0.250302	0.627629		106.197	-0.0565849	0.389145	0.0210484	0.884647	0.95234		114.626	0.521392	0.515049	0.953554	0.328816	0.790079					93.7071	0.0656814	0.273135	0.0571105	0.811123	NA		158.232	0.127256	0.380577	0.112673	0.737121	1
ENSMUSG00000015112	Slc25a13	34.332	1.40424	1.6716	0.738806	0.390044	0.748738		49.562	0.613312	0.501136	1.45022	0.228492	0.498081		40.2938	1.24439	0.879623	2.10698	0.146628	0.620855					43.5692	-0.072307	0.353391	0.0413796	0.838807	NA		56.9448	0.296801	0.466305	0.414584	0.519652	1
ENSMUSG00000015120	Ube2i	35.7616	0.806814	1.11074	0.502835	0.478257	0.801919		51.2418	1.28739	0.360767	12.7604	0.000354029	0.006899		34.6143	-0.28924	0.565876	0.24738	0.618926	0.925455	B				46.8229	-0.693978	0.284154	6.15581	0.0130981	NA		36.237	-0.202663	0.455701	0.195209	0.658616	1
ENSMUSG00000015127	Unkl	13.4417	3.89693	1.7486	3.53629	0.0600395	0.339604		20.1489	1.23092	0.86272	2.08939	0.148325	0.393739		6.62236	0.872024	1.51594	0.227466	0.633409	0.929611					19.9651	-0.179784	0.580719	0.092073	0.761558	NA		11.6728	0.743709	0.962402	0.612186	0.433966	1
ENSMUSG00000015133	Lrrk1	71.6796	-0.152231	0.828072	0.0378635	0.845718	0.961871		95.8919	0.187761	0.334238	0.318021	0.572799	0.785223		101.964	0.225412	0.39817	0.334008	0.563308	0.911124					73.8568	-0.156705	0.41276	0.143727	0.704603	NA		123.957	-0.275411	0.353311	0.599043	0.438943	1
ENSMUSG00000015134	Aldh1a3	5.57589	-1.04983	2.74943	0.257864	0.611591	NA		8.08658	-2.03803	1.11577	2.77329	0.0958491	0.304559		11.2022	1.99966	1.53159	1.58496	0.208048	0.699449					9.96854	0.00372371	0.978584	0.00174485	0.966681	NA		11.847	0.117471	0.994586	0.0150003	0.902522	1
ENSMUSG00000015143	Actn1	3421.67	-0.965827	0.554222	3.54233	0.0598215	0.339312		3751.49	-0.282207	0.266912	1.12783	0.288238	0.561952		5137.7	-0.340978	0.462204	0.500435	0.479309	0.876821					2959.06	-0.0578301	0.199148	0.082822	0.773509	0.94812		5432.59	0.061746	0.309417	0.0399743	0.841531	1
ENSMUSG00000015149	Sirt2	185.414	0.0377527	0.502286	0.00569857	0.939826	0.986276		265.998	-0.0583921	0.232935	0.0624592	0.80265	0.913969		273.111	0.317354	0.282979	1.19676	0.273971	0.752461					246.154	0.0545819	0.211063	0.0665685	0.7964	0.948967		306.175	-0.323759	0.276457	1.34037	0.246969	1
ENSMUSG00000015165	Hnrnpl	541.045	-0.565377	0.425291	1.72975	0.188443	0.565267		566.695	0.104756	0.320777	0.10775	0.74272	0.883011		754.202	-0.146948	0.395031	0.136447	0.711839	0.951116					389.866	-0.281911	0.245023	1.32229	0.250181	0.694034		792.86	0.284908	0.357252	0.64971	0.420217	1
ENSMUSG00000015176	Nolc1	88.4321	-0.00213274	0.710555	9.92935e-06	0.997486	1		77.8923	-0.298389	0.348108	0.717751	0.396882	0.6597		106.471	0.0069715	0.387574	0.000341125	0.985264	0.998163				NOLC1	65.02	0.339148	0.389769	0.721961	0.395501	NA		122.433	-0.00564985	0.262553	0.000463021	0.982833	1
ENSMUSG00000015189	Casd1	241.71	-1.36425	0.450695	9.93043	0.00162568	0.0447552		298.041	-0.429573	0.242131	3.11241	0.0776978	0.270195		363.433	-0.334174	0.325749	1.0818	0.298294	0.770062	A				243.614	-0.00120279	0.202754	3.36712e-05	0.99537	0.998604		361.976	-0.0479821	0.279229	0.0293334	0.864012	1
ENSMUSG00000015202	Cnksr3	11.0374	5.89774	2.05721	8.48792	0.00357512	0.0727456		14.3189	-0.28657	0.654836	0.186503	0.665843	0.841543		15.6948	3.54012	1.20162	5.62359	0.0177203	0.244951					12.7554	0.149823	0.501415	0.0874809	0.767404	NA		18.4648	-2.25671	0.860128	6.15898	0.0130747	1
ENSMUSG00000015214	Mtmr1	121.151	0.240676	0.617737	0.158165	0.690852	0.900336		151.697	0.457337	0.302831	2.30302	0.129122	0.363608		130.409	-0.41159	0.44207	0.803545	0.370036	0.818807					142.455	-0.259503	0.272295	0.916183	0.338479	0.764172		129.204	-0.0973828	0.336722	0.0827172	0.773648	1
ENSMUSG00000015217	Hmgb3	12.3743	-1.30122	1.84091	0.537759	0.463363	0.79507		19.5403	-0.8876	0.739707	1.44896	0.228695	0.498182		21.8921	0.403651	0.7702	0.271196	0.60253	0.922145					13.4742	-0.205371	0.55939	0.122731	0.726091	NA		25.5963	-0.269022	0.638026	0.171588	0.678704	1
ENSMUSG00000015222	Map2	11.4624	1.03036	2.00914	0.139376	0.708903	0.907957		16.5019	-2.68273	0.937859	6.69525	0.00966701	0.0743668		26.2365	2.99787	1.19657	5.35181	0.0207008	0.264774					7.55611	0.39793	0.809492	0.175436	0.675325	NA		23.1114	-1.51936	1.11215	1.63885	0.200484	1
ENSMUSG00000015224	Cyp2j9	6.03761	-4.00278	2.66196	2.25792	0.132932	NA		3.60522	-4.45556	1.79475	5.34856	0.0207394	0.121707		9.79989	0.0457894	1.81446	0.000766345	0.977915	0.997964					0.309304	-0.0268662	2.66462	-0.000778262	1	NA		5.2196	-3.84283	1.88587	3.28964	0.0697182	1
ENSMUSG00000015243	Abca1	83.3399	0.308448	0.679438	0.21518	0.642737	0.88038		98.5322	-0.394496	0.477258	0.659733	0.416654	0.675855		131.268	0.594658	0.364869	2.56543	0.109223	0.556507					72.1677	0.0339221	0.345465	0.00979708	0.921154	NA		161.274	-0.474067	0.322492	2.0971	0.147579	1
ENSMUSG00000015247	Nipsnap3b	92.5539	0.0951383	0.703663	0.0192976	0.889517	0.972886		93.2006	-0.285572	0.313711	0.825492	0.363579	0.629391		116.592	0.0925796	0.347197	0.073289	0.786607	0.969379					84.1992	0.27022	0.243708	1.17686	0.277995	NA		126.181	-0.25404	0.321788	0.613761	0.433375	1
ENSMUSG00000015289	Lage3	212.356	1.65714	0.716221	3.89068	0.0485548	0.306861		256.955	0.674639	0.33169	4.17019	0.0411411	0.1869		200.515	0.443587	0.457175	0.787392	0.37489	0.82045					260.397	-0.123546	0.22723	0.292686	0.588504	0.895493		248.865	0.467946	0.311579	2.31455	0.128168	1
ENSMUSG00000015290	Ubl4a	174.175	2.59717	0.73936	8.68323	0.00321152	0.0685404		305.534	0.839882	0.434631	3.78613	0.0516791	0.213356		166.777	1.24585	0.604815	3.32319	0.0683093	0.456275					330.301	-0.139275	0.286681	0.236963	0.626408	0.905904		209.1	0.119683	0.494398	0.058973	0.808127	1
ENSMUSG00000015291	Gdi1	536.669	-0.101088	0.449373	0.0500432	0.822988	0.953422		705.552	-0.151766	0.266395	0.327158	0.567338	0.781511		650.993	-0.000141576	0.340266	1.66708e-07	0.999674	1					624.842	-0.128075	0.248956	0.268645	0.604242	0.900629		678.376	-0.162593	0.272139	0.35245	0.55273	1
ENSMUSG00000015305	Sash1	20.0934	5.1589	1.84239	4.21521	0.0400632	0.276486		15.6326	0.328627	0.775636	0.151367	0.697232	0.85967		12.9618	3.28401	1.13751	7.35494	0.00668788	0.152404					13.4778	0.491595	0.611931	0.557869	0.45512	NA		16.4139	-0.234756	0.75484	0.0963247	0.756285	1
ENSMUSG00000015312	Gadd45b	48.4939	-0.983258	0.997543	0.969491	0.324807	0.696557		59.415	-0.537956	0.498075	1.06491	0.302099	0.575123		68.7764	0.373089	0.662841	0.367383	0.544434	0.906553					66.3213	0.944008	0.359966	5.66279	0.0173285	NA		85.5483	-0.0668192	0.454539	0.0216213	0.883099	1
ENSMUSG00000015314	Slamf6	252.948	-0.411424	0.509462	0.701861	0.402159	0.758493		242.354	-0.173502	0.355797	0.236044	0.627078	0.821895		346.246	-0.0708444	0.351915	0.0426994	0.836292	0.974417					209.53	0.312179	0.23789	1.71398	0.19047	0.639058		383.257	-0.0660555	0.311736	0.0447286	0.832504	1
ENSMUSG00000015316	Slamf1	1009.14	-0.488263	0.39649	1.54666	0.213629	0.594554		1410.82	-0.614405	0.312122	3.83503	0.0501921	0.209807		1768.87	0.151283	0.466846	0.0851629	0.770419	0.965337					1053.29	-0.057321	0.172233	0.110268	0.739839	0.941366		1915.42	0.125431	0.344951	0.13273	0.715618	1
ENSMUSG00000015335	Zdhhc12	2.1069	5.26652	4.57318	0.966341	0.325594	NA		1.79468	0.968653	1.95097	0.259696	0.610329	NA		1.16022	3.6151	3.86927	0.999702	0.317383	NA					1.88583	0.346721	1.26904	0.0714239	0.789275	NA		4.44955	0.319979	1.57268	0.0414355	0.8387	1
ENSMUSG00000015340	Cybb	2027.95	0.1209	0.509564	0.0521163	0.819421	0.952364		1867.26	0.568316	0.313873	3.27409	0.0703821	0.255678		1960.4	-0.224625	0.387486	0.351093	0.553495	0.908846		ENSMUSG00000015340			1847.51	0.22827	0.297672	0.559774	0.454351	0.828393		2276.46	-0.0583849	0.298137	0.0382063	0.84503	1
ENSMUSG00000015341	Golga7	333.487	0.150844	0.545924	0.0665068	0.796492	0.943224		507.758	0.317742	0.287261	1.24504	0.264502	0.536869		406.727	-0.0713034	0.452171	0.0220736	0.881891	0.982647					447.552	-0.402127	0.216404	3.54511	0.0597212	0.423968		393.663	-0.183705	0.345259	0.278463	0.597711	1
ENSMUSG00000015342	Xk	248.991	0.0485315	0.444803	0.0116065	0.914207	0.977976		388.246	0.567371	0.342526	2.79402	0.0946164	0.302676		288.105	-0.282205	0.464048	0.336825	0.561668	0.910712					377.768	-0.406667	0.28679	2.02935	0.154286	0.597131		329.777	0.142831	0.362553	0.156226	0.692655	1
ENSMUSG00000015355	Cd48	377.63	-0.312401	0.63273	0.215618	0.642399	0.880213		278.284	-0.735319	0.317925	5.23338	0.0221574	0.126472		407.727	-0.391653	0.495507	0.652937	0.419065	0.846433					244.202	0.302835	0.247759	1.39254	0.237977	0.681545		482.209	0.174078	0.378704	0.21345	0.644077	1
ENSMUSG00000015357	Clpx	41.738	-1.01269	0.821244	1.55644	0.212187	0.592608		35.1307	-0.314181	0.389279	0.638829	0.424135	0.681237		41.1895	-0.673745	0.534967	1.85451	0.173259	0.656186					35.0818	0.263927	0.277392	0.877143	0.348985	NA		39.0061	-0.517212	0.417766	1.50147	0.220445	1
ENSMUSG00000015363	Trabd	182.163	-0.723593	0.603427	1.62672	0.202158	0.580054		167.888	-0.237585	0.284498	0.683205	0.408485	0.669238		212.472	-0.0593604	0.51196	0.0160323	0.899242	0.985842					125.685	-0.183367	0.219342	0.69751	0.403622	0.804584		224.926	-0.475717	0.318682	2.15471	0.142133	1
ENSMUSG00000015377	Dennd6b	8.60773	-0.627996	2.35184	0.0771394	0.781212	0.936061		3.88032	0.0117736	1.15753	9.33567e-05	0.992291	0.999445		7.29267	-1.69136	1.27674	1.86466	0.172087	0.655489					3.0989	-0.186098	0.861119	0.0478787	0.826796	NA		7.5917	1.60868	0.987838	2.75524	0.0969365	1
ENSMUSG00000015396	Cd83	124.358	-0.139871	0.591862	0.0605123	0.805688	0.945835		123.327	-0.174602	0.306849	0.318713	0.572382	0.78499		150.569	-0.0954941	0.331593	0.0872161	0.767747	0.964666					101.363	-0.216894	0.295309	0.508968	0.475586	NA		188.146	-0.214121	0.27586	0.591144	0.441977	1
ENSMUSG00000015401	Cltrn	2.50648	3.90256	3.9304	0.562956	0.453072	NA		4.05885	-0.121425	1.10745	0.01235	0.911513	0.965148		3.25791	1.01669	2.00748	0.0963118	0.756301	NA					6.50097	1.03087	0.895946	1.24968	0.263614	NA		5.53231	1.20594	1.13109	1.17819	0.277725	1
ENSMUSG00000015405	Ace2	6.99058	4.17885	2.43462	1.68595	0.194136	NA		6.49063	0.242138	1.0324	0.0312763	0.859625	0.939174		7.58815	2.2945	1.52431	1.7027	0.191935	0.677372					4.21017	-0.245165	0.909804	0.0616493	0.803908	NA		8.95028	0.618957	1.27486	0.211723	0.64542	1
ENSMUSG00000015437	Gzmb	57.3631	-1.22753	0.738623	2.96043	0.0853251	0.400246		45.1675	-1.30281	0.546041	5.51678	0.0188349	0.1144		56.718	-1.04703	0.551472	4.20728	0.0402509	0.36495					33.7121	-0.128899	0.480554	0.0670126	0.795737	NA		60.4981	-0.10112	0.43103	0.0547797	0.814946	1
ENSMUSG00000015461	Atf6b	250.827	-0.565618	0.542533	1.20825	0.271678	0.648745		309.74	0.190606	0.2641	0.512901	0.473886	0.720256		338.642	0.221527	0.450391	0.272029	0.601974	0.92197					242.463	-0.0645029	0.238369	0.0722421	0.7881	0.94812		410.493	0.162691	0.324714	0.254206	0.614129	1
ENSMUSG00000015468	Notch4	1.74572	-2.9852	3.90997	0.874629	0.349677	NA		6.20783	-2.52259	1.18628	4.21448	0.0400803	0.184231		8.85632	1.8552	1.381	1.92285	0.165543	0.647352					3.19704	0.0547176	1.04994	0.00190695	0.965169	NA		8.53134	-1.71631	1.02021	2.52353	0.112159	1
ENSMUSG00000015474	Ppt2	148.434	0.508194	0.608942	0.63013	0.427308	0.774614		123.223	0.624785	0.24063	6.71497	0.00956068	0.0737458		120.467	-0.504218	0.348824	2.16148	0.141509	0.613757					114.235	-0.161554	0.309488	0.272702	0.601525	0.899704		127.95	0.250364	0.270239	0.87088	0.350712	1
ENSMUSG00000015476	Prrt1	5.83801	-1.72828	3.14793	0.473477	0.491392	NA		8.9432	0.37468	0.784764	0.224007	0.636004	0.82559		7.82152	1.05647	1.38859	0.673313	0.411899	0.843651					7.74462	-0.403124	0.756814	0.245836	0.620023	NA		13.6727	0.530809	0.8643	0.38485	0.535019	1
ENSMUSG00000015478	Rnf5	6.43538	-2.9408	2.28093	1.80828	0.178715	NA		8.27235	-0.676975	0.753065	0.809727	0.368201	0.634342		12.6808	-0.489209	0.74733	0.411798	0.521058	0.900409					7.09804	0.6956	0.617357	1.25589	0.262431	NA		13.063	0.471884	0.65115	0.525709	0.468416	1
ENSMUSG00000015488	Cacfd1	126.374	-0.238606	0.553163	0.193848	0.659733	0.888952		128.316	-0.0665157	0.292033	0.0502428	0.822641	0.923156		166.795	0.162852	0.447501	0.146789	0.701623	0.948885					97.0852	-0.0396012	0.225589	0.0306265	0.861076	NA		178.821	-0.376131	0.369123	1.01115	0.314626	1
ENSMUSG00000015501	Hivep2	158.346	0.283134	0.726326	0.159362	0.689745	0.900083		163.071	0.200317	0.266853	0.556209	0.455792	0.706422		192.267	-0.0421452	0.33693	0.0153778	0.90131	0.986119					133.104	-0.215092	0.197229	1.19466	0.274392	0.713689		206.962	0.0140402	0.286237	0.00240788	0.960863	1
ENSMUSG00000015522	Arnt	51.0479	-0.68257	0.907135	0.49661	0.480994	0.803738		41.6673	0.512508	0.424473	1.4302	0.231732	0.501605		51.1849	-0.809537	0.506928	2.79632	0.0944811	0.52282					40.0297	-0.0498268	0.287062	0.0298286	0.86288	NA		48.3986	-0.399619	0.386415	1.05418	0.304545	1
ENSMUSG00000015533	Itga2	632.695	-0.772697	0.403438	3.87584	0.0489858	0.308152		730.556	-0.666344	0.293874	5.0769	0.0242467	0.133529		1091.88	0.165686	0.494277	0.088183	0.7665	0.964572					522.514	-0.0644327	0.172606	0.139969	0.708312	0.928512		1111.63	0.0626197	0.308158	0.0413782	0.83881	1
ENSMUSG00000015536	Mocs2	87.2423	1.39381	0.781566	2.99601	0.0834699	0.39651		161.294	-0.205946	0.354708	0.340693	0.55943	0.777425		151.874	1.54095	0.475848	9.3557	0.00222293	0.0850119					162.355	0.366711	0.283965	1.65456	0.19834	0.646593		190.591	0.18398	0.336968	0.302211	0.5825	1
ENSMUSG00000015542	Nat9	15.7656	5.71364	1.86843	6.22526	0.0125941	0.14786		21.092	0.574984	0.476545	1.43412	0.231094	0.50075		18.0142	3.62266	0.956866	12.83	0.000341114	0.026689	F				24.8875	0.774924	0.382929	3.94159	0.0471062	NA		30.1784	0.513324	0.514571	1.02382	0.311615	1
ENSMUSG00000015568	Lpl	180.087	1.44388	0.953884	1.87753	0.170615	0.543771		152.685	-2.12993	0.804782	6.00075	0.0142998	0.0963196		249.132	1.92083	0.838374	5.01237	0.0251668	0.286975		ENSMUSG00000015568			68.5606	0.67084	0.397175	2.73933	0.0979059	NA		226.643	-2.09644	0.660696	8.20827	0.00416998	1
ENSMUSG00000015575	Atp6v0e	1684.77	-0.121639	0.525565	0.0463863	0.829475	0.955956		1930.26	-0.349356	0.292746	1.43669	0.230676	0.500495		2344.06	-0.13275	0.489209	0.0589762	0.808121	0.971684					1718.51	0.120594	0.183789	0.422163	0.51586	0.854581		2687.57	0.392192	0.393257	1.01182	0.314467	1
ENSMUSG00000015597	Zfp318	213.12	1.38399	0.463328	8.05696	0.00453291	0.0842445		192.61	0.304781	0.39735	0.583461	0.444959	0.698023		231.294	0.451746	0.402787	1.128	0.288202	0.763432					164.943	-0.0393726	0.287015	0.0189915	0.890391	0.973376		271.685	-0.352356	0.307778	1.27843	0.25819	1
ENSMUSG00000015599	Ttbk1	6.89523	2.1495	1.90465	1.02779	0.310678	NA		6.97074	0.0825634	0.827964	0.00973003	0.921423	0.969845		7.23083	1.0282	1.08207	0.834678	0.360923	0.814411					5.32292	-0.382132	0.606522	0.402965	0.525562	NA		7.96871	-0.11693	0.917421	0.0158452	0.899829	1
ENSMUSG00000015605	Srf	100.397	-1.5834	0.648937	7.08107	0.00779026	0.112609		106.624	-0.147328	0.320137	0.213114	0.644338	0.830048		135.936	-0.477924	0.485848	1.06128	0.302923	0.773977					75.7067	-0.240505	0.361749	0.452007	0.501384	NA		137.42	-0.279514	0.446545	0.383938	0.535503	1
ENSMUSG00000015619	Gata3	110.31	-0.650525	0.622734	1.22004	0.269353	0.647516		111.119	-0.0537461	0.348855	0.0238568	0.87725	0.948871		132.245	-0.336381	0.439409	0.618569	0.43158	0.851948				GATA3	78.791	-0.490855	0.321731	2.37837	0.123026	NA		153.829	-0.0124372	0.355987	0.00122204	0.972113	1
ENSMUSG00000015647	Lama5	2.06771	1.56043	3.50262	0.105753	0.745032	NA		3.63309	1.73985	1.11448	2.2825	0.13084	0.366454		2.19224	0.317298	2.0451	0.0209492	0.884917	NA					3.60672	-0.666359	0.799187	0.714365	0.397999	NA		2.40407	0.357993	1.73185	0.0440745	0.833715	1
ENSMUSG00000015656	Hspa8	2245.66	-0.514067	0.50684	0.943529	0.331372	0.703905		2164.14	0.141986	0.278369	0.259766	0.610281	0.81181		2336.16	-0.508607	0.446252	1.46257	0.226521	0.715703					2317.88	0.220422	0.222573	0.941237	0.33196	0.762628		2797.07	0.191252	0.327383	0.346165	0.556292	1
ENSMUSG00000015665	Awat1	2.42961	6.33768	4.72303	1.31659	0.251205	NA		47.4799	1.97459	1.46432	1.77586	0.182659	0.440173		21.1629	6.78881	2.0202	7.38433	0.00657946	0.151582					32.9055	-1.17082	0.861396	1.52136	0.217414	NA		62.2286	2.39055	1.79204	1.89331	0.168829	1
ENSMUSG00000015668	Pdzd11	42.4966	-1.19894	1.17031	0.87205	0.350388	0.71834		41.9989	-0.805405	0.394417	4.01924	0.0449839	0.197023		63.5754	0.0990003	0.557283	0.0314523	0.859235	0.97872					30.2501	0.546839	0.314158	2.96959	0.0848431	NA		71.7	-0.0394943	0.456047	0.0074584	0.931179	1
ENSMUSG00000015671	Psma2	769.546	0.281919	0.367305	0.578996	0.446706	0.783414		856.25	-0.174773	0.191092	0.839519	0.359534	0.62532		972.829	0.105298	0.299525	0.115062	0.734454	0.955532		ENSMUSG00000015671			841.439	0.285216	0.171763	2.70681	0.0999204	0.508497		1178.73	0.0850384	0.265747	0.102787	0.74851	1
ENSMUSG00000015672	Mrpl32	453.833	0.135204	0.497698	0.0661629	0.797008	0.943251		706.298	0.594886	0.323009	3.49128	0.061693	0.237614		588.464	-0.0776899	0.465072	0.0237124	0.877619	0.981864					788.475	0.128407	0.334227	0.146825	0.701588	0.92693		722.447	0.520897	0.393085	1.81149	0.178329	1
ENSMUSG00000015697	Setdb1	7.30675	0.250937	2.01958	0.0166497	0.897331	0.975216		10.7959	0.693956	0.756249	0.768012	0.380833	0.646057		10.2544	0.45615	1.09006	0.204558	0.651067	0.933433					10.0101	-0.0455704	0.515236	0.00719103	0.93242	NA		10.3839	-0.705842	0.890662	0.610693	0.434527	1
ENSMUSG00000015702	Anxa9	15.3336	0.591985	1.90133	0.0586195	0.808691	0.947269		14.6591	-0.913879	0.80543	1.11454	0.291097	0.5652		22.5658	1.17718	0.781197	2.39036	0.122086	0.583219					9.47068	0.483118	0.57191	0.671398	0.412564	NA		24.2771	0.409844	0.629589	0.436638	0.50875	1
ENSMUSG00000015709	Arnt2	0.663909	3.77255	5.8205	0.446258	0.504117	NA		1.05174	0.653134	1.84395	0.143308	0.705014	NA		0.531914	2.2212	3.89365	0.445625	0.50442	NA					2.9476	1.50373	0.867209	2.53658	0.111235	NA		1.6403	1.63498	2.08168	0.675287	0.411214	1
ENSMUSG00000015711	Prune1	84.016	-0.0148735	0.678344	0.000510111	0.981981	0.996306		109.515	-0.434903	0.34122	1.62057	0.203012	0.465835		133.261	0.548756	0.475705	1.31854	0.250854	0.732712					101.789	0.492625	0.252854	3.75318	0.0527071	NA		172.447	0.164539	0.347491	0.226799	0.633908	1
ENSMUSG00000015714	Cers2	58.4633	0.637361	0.786405	0.615395	0.432764	0.776488		52.6721	-0.286272	0.371627	0.584388	0.444597	0.697616		62.0315	0.113863	0.442885	0.0671901	0.795473	0.969537					56.5142	0.519664	0.262922	3.69897	0.0544461	NA		79.9007	-0.242179	0.317912	0.573988	0.448679	1
ENSMUSG00000015733	Capza2	669.886	-0.583227	0.443956	1.72346	0.189248	0.566124		689.901	-0.447465	0.218667	4.17165	0.0411056	0.1869		898.044	-0.256849	0.333925	0.58148	0.445733	0.858522					588.938	0.157682	0.167024	0.872128	0.350367	0.771757		1023.05	0.346366	0.264685	1.7478	0.186154	1
ENSMUSG00000015745	Plekho1	333.208	0.114896	0.534526	0.0504335	0.822311	0.952998		375.209	0.140049	0.291676	0.22841	0.632706	0.824251		415.909	0.145938	0.407416	0.136295	0.711993	0.951116					279.113	-0.317746	0.213885	2.24101	0.134393	0.564704		551.649	0.406345	0.29987	1.8901	0.169191	1
ENSMUSG00000015747	Vps45	31.3432	1.09378	1.10902	0.94718	0.330438	0.702963		33.3225	-0.546275	0.466345	1.3773	0.240562	0.511492		40.0042	0.548044	0.633851	0.61513	0.432863	0.852588					25.243	-0.114509	0.341917	0.109023	0.74126	NA		44.0686	-0.00329036	0.507908	4.17701e-05	0.994843	1
ENSMUSG00000015748	Prpf3	44.3645	0.0931221	0.968758	0.00876512	0.925409	0.982487		45.6316	0.053764	0.316773	0.0290557	0.86465	0.942178		44.3887	0.115382	0.501171	0.0538202	0.816544	0.973054					40.9368	-0.0103403	0.259564	0.00157062	0.968387	NA		50.6594	-0.0014734	0.357754	1.68784e-05	0.996722	1
ENSMUSG00000015749	Anp32e	6066.79	1.43844	0.526301	5.98263	0.0144474	0.162537		10044.4	1.0335	0.324599	10.3409	0.00130113	0.0186444		4828.22	0.479888	0.360779	1.62581	0.202284	0.69033	B				11058.7	-0.129899	0.278265	0.220364	0.638763	0.909932		5885.27	0.228693	0.341177	0.455771	0.499607	1
ENSMUSG00000015750	Aph1a	132.205	-0.112928	0.703597	0.0290836	0.864586	0.967232		162.75	0.318123	0.308383	1.0616	0.302852	0.57591		171.6	0.142637	0.48782	0.0900148	0.764158	0.964321		ENSMUSG00000015750			126.965	-0.188619	0.249018	0.574137	0.44862	0.822575		190.466	-0.247609	0.341336	0.518264	0.471583	1
ENSMUSG00000015755	Tab2	2022.36	-0.186531	0.39301	0.238955	0.624962	0.874301		2484.95	0.45659	0.241386	3.59365	0.0580007	0.228911		2399.07	-0.24749	0.317414	0.607054	0.435899	0.854149					2144.24	-0.307655	0.19117	2.60707	0.106388	0.522411		2584.05	-0.0602642	0.26926	0.049882	0.823269	1
ENSMUSG00000015757	Ppil4	325.386	-0.0198997	0.581921	0.00101344	0.974604	0.993978		352.364	-0.0568858	0.305842	0.0346321	0.852369	0.936591		425.464	-0.0564857	0.456453	0.0134323	0.907734	0.987685					309.672	0.116405	0.242698	0.226398	0.634207	0.908708		528.241	0.764428	0.379768	4.20576	0.040287	1
ENSMUSG00000015759	Cnih1	147.676	0.00859123	0.514662	0.000277294	0.986714	0.997914		161.202	-0.367162	0.247144	2.18219	0.139615	0.381393		186.15	0.0859491	0.306571	0.0787299	0.779026	0.967909					126.979	-0.195297	0.267295	0.52412	0.469089	0.833134		209.477	0.0182969	0.240449	0.00581533	0.939214	1
ENSMUSG00000015766	Eps8	34.4314	-0.905819	0.943286	1.0545	0.304473	0.677637		24.9092	-1.83054	0.642351	7.04053	0.00796854	0.0648682		50.9507	-0.115248	0.548724	0.0496215	0.823723	0.973226					13.3746	-0.0121058	0.666472	0.000296839	0.986254	NA		49.9167	-0.0703469	0.44248	0.0251808	0.873917	1
ENSMUSG00000015776	Med22	47.6914	1.7919	1.13161	2.58493	0.107885	0.447077		67.3856	-0.671658	0.484768	1.84317	0.17458	0.429179		72.407	1.79322	0.651341	6.6631	0.00984297	0.182327					44.5597	-0.0626168	0.387284	0.0232391	0.878837	NA		75.4589	-1.51103	0.47915	8.83903	0.00294856	1
ENSMUSG00000015790	Surf1	101.956	-0.177896	0.775785	0.0606755	0.805431	0.945715		110.952	-0.865863	0.261869	10.5963	0.00113312	0.0167851		144.11	0.36736	0.473347	0.652769	0.419124	0.846433	B				101.383	0.561223	0.219741	6.217	0.0126529	NA		162.285	-0.266609	0.328119	0.648825	0.420533	1
ENSMUSG00000015804	Med28	1211.12	1.45422	0.523411	6.05317	0.0138814	0.158014		1434.44	0.511822	0.220383	5.41248	0.0199933	0.118585		954.196	0.367897	0.361509	0.979042	0.322435	0.786202					1452.52	-0.108528	0.187485	0.336725	0.561726	0.881587		1157.07	0.203762	0.26129	0.616411	0.432384	1
ENSMUSG00000015806	Qdpr	249.821	-0.0953247	0.473564	0.0425189	0.836634	0.958067		210.221	-0.427286	0.377329	1.2224	0.26889	0.54135		289.278	0.126024	0.519652	0.0668318	0.796007	0.969772					166.964	0.22276	0.215068	1.07102	0.300715	0.737018		306.866	-0.321507	0.388612	0.668186	0.413685	1
ENSMUSG00000015812	Gnrh1	5.79577	5.84115	3.34744	1.87852	0.170502	NA		7.23259	1.37951	0.896736	2.46065	0.116731	0.34258		5.19972	1.98009	1.49476	1.07006	0.300931	0.773174					6.3653	-0.778581	0.85578	0.796057	0.372275	NA		7.52903	0.884156	1.14856	0.614605	0.433059	1
ENSMUSG00000015837	Sqstm1	5904.78	1.21962	0.521926	4.34473	0.0371236	0.267417		9686.66	1.24747	0.303873	17.1171	3.51439e-05	0.00110988		5908.18	0.170023	0.459681	0.117433	0.731835	0.955093	B				10053.3	-0.362447	0.293002	1.55268	0.21274	0.655503		6591.1	-0.0785049	0.374522	0.0436836	0.834443	1
ENSMUSG00000015839	Nfe2l2	265.46	-0.605577	0.431299	2.06203	0.151009	0.517571		262.337	0.362107	0.266637	1.81706	0.177664	0.433601		298.783	-0.601154	0.299641	4.29646	0.0381917	0.355257					242.801	-0.0713483	0.229591	0.0957651	0.756972	0.944277		301.064	0.0294345	0.265759	0.0123023	0.911683	1
ENSMUSG00000015846	Rxra	43.3657	-0.559498	0.829344	0.469412	0.493258	0.809796		70.3921	-0.380535	0.42939	0.756239	0.384508	0.649308		81.9332	0.794163	0.606359	1.92231	0.165602	0.647352					50.5942	-0.124042	0.323177	0.14714	0.701284	NA		86.7712	-0.490514	0.551308	0.764025	0.382072	1
ENSMUSG00000015850	Adamtsl4	22.4727	-2.70879	1.53509	4.17235	0.0410887	0.280086		18.8812	-2.01972	0.675705	8.47339	0.00360379	0.0380206		32.1343	-0.380428	0.868524	0.234661	0.628089	0.928251	B				14.9457	0.600922	0.734169	0.448353	0.503118	NA		24.6663	-0.434829	0.558789	0.595536	0.440286	1
ENSMUSG00000015852	Fcrls	1.72114	5.44538	5.79398	0.919277	0.337665	NA		1.01865	-3.28602	2.52244	1.34696	0.245811	NA		1.71109	3.71894	2.86599	1.50609	0.219736	NA					1.09608	2.80269	2.56324	1.07718	0.299329	NA		2.26799	-0.412709	2.14137	0.0415025	0.838571	1
ENSMUSG00000015869	Prpsap1	84.676	1.32492	0.842	2.40368	0.12105	0.472558		92.6201	-0.979461	0.531581	3.27234	0.0704573	0.255678		114.882	1.32421	0.693917	3.44255	0.0635375	0.444727					73.0359	0.384399	0.360046	1.09036	0.296392	NA		137.033	-1.36787	0.532679	5.86777	0.0154205	1
ENSMUSG00000015880	Ncapg	75.7992	1.10157	1.70778	0.173394	0.677113	0.894862		61.6156	1.24358	0.677261	3.33668	0.0677512	0.250599		62.3206	-1.36623	1.59312	0.437398	0.508381	0.893684					59.9267	-0.43207	0.428347	0.960468	0.327069	NA		44.6716	0.762846	0.792228	0.95175	0.329274	1
ENSMUSG00000015882	Lcorl	64.612	-1.22186	0.915579	2.17702	0.140086	0.5018		65.8583	-0.128485	0.349623	0.133296	0.715038	0.869115		87.4502	-0.430008	0.462648	1.00656	0.315729	0.782145					70.5182	0.48776	0.275615	2.99511	0.0835161	NA		87.654	-0.0911777	0.31848	0.0818319	0.77483	1
ENSMUSG00000015889	Lta4h	213.697	-0.866579	0.460994	3.64363	0.056284	0.328543		190.535	0.583557	0.336839	3.02732	0.0818734	0.278802		227.165	-0.836616	0.421647	4.42997	0.0353132	0.339519					219.989	0.399069	0.229914	2.94784	0.0859924	0.482581		215.036	-0.136156	0.339946	0.159248	0.68985	1
ENSMUSG00000015932	Dstn	155.411	1.57505	1.12389	1.08853	0.296797	0.671168		160.076	1.08932	0.420549	6.66236	0.00984705	0.0753093		173.254	0.330441	0.797309	0.116905	0.732416	0.955093					178.205	-0.0378815	0.351229	0.0105077	0.918354	0.980894		224.425	0.563782	0.575943	0.987033	0.320469	1
ENSMUSG00000015937	Macroh2a1	824.003	-0.72139	0.477393	2.61258	0.106019	0.443181		667.122	-0.443175	0.258981	2.86812	0.0903503	0.295078		966.365	-0.409013	0.345363	1.54608	0.213715	0.702554					478.344	-0.0419595	0.219357	0.0366317	0.848217	0.960858		995.859	-0.171899	0.25875	0.43603	0.509045	1
ENSMUSG00000015942	Gtf2ird2	42.6196	0.645804	0.873919	0.562575	0.453225	0.787285		35.7553	1.07146	0.50498	4.51089	0.0336797	0.165435		37.5988	-0.707105	0.531123	1.75207	0.185617	0.672801					31.5561	-0.607577	0.480273	1.62703	0.202115	NA		39.351	0.196742	0.415639	0.226911	0.633823	1
ENSMUSG00000015943	Bola1	28.4205	-1.62933	1.14293	1.80566	0.17903	0.554408		33.9086	-0.759866	0.441498	2.8211	0.0930325	0.299656		56.6531	0.457064	0.6254	0.578584	0.446868	0.858891					25.1997	0.917589	0.474615	3.66192	0.0556696	NA		68.3041	0.16407	0.398494	0.171457	0.678821	1
ENSMUSG00000015944	Castor2	16.9914	2.01197	1.83326	0.57708	0.447459	0.783614		19.4364	0.408711	0.575587	0.511106	0.474661	0.720522		19.513	1.26925	1.00229	1.20382	0.272559	0.751578					13.945	-0.331408	0.550496	0.368481	0.543833	NA		23.6696	-0.20886	0.573734	0.132053	0.716313	1
ENSMUSG00000015947	Fcgr1	28.5082	-2.44929	1.34511	4.18987	0.0406661	0.278915		19.5115	-2.50766	0.990693	5.49533	0.0190673	0.115278		47.4019	-0.42886	0.877586	0.290906	0.58964	0.919184					10.5628	1.23134	0.727261	2.55632	0.109854	NA		59.1259	0.618848	0.654944	0.929107	0.335095	1
ENSMUSG00000015950	Ncf1	903.193	0.221781	0.455683	0.252264	0.615486	0.870672		1068.59	0.368726	0.273766	1.82554	0.176655	0.432758		1024.22	0.0821743	0.326539	0.0672694	0.795355	0.969537					1170.38	0.311126	0.208963	2.16569	0.141122	0.578154		1295.17	-0.0849828	0.273151	0.0960802	0.756585	1
ENSMUSG00000015961	Adss	205.264	-0.192001	0.58406	0.119815	0.729235	0.914835		173.521	-0.194472	0.315747	0.371753	0.54205	0.765644		210.189	-0.110098	0.472081	0.0640087	0.800269	0.97073					164.016	0.274081	0.245334	1.21426	0.270491	0.71115		216.216	-0.358773	0.29901	1.40679	0.23559	1
ENSMUSG00000015966	Il17rb	2.44356	5.83716	5.19168	1.15118	0.283302	NA		2.29602	0.306254	1.78124	0.0316447	0.85881	NA		1.92605	3.97246	3.31495	1.0499	0.305531	NA					1.69514	-0.16809	1.30732	0.0195115	0.88891	NA		2.36845	-0.053094	2.19539	-0.000277056	1	1
ENSMUSG00000015968	Cacna1d	5.65232	3.0929	2.58828	1.10297	0.293616	NA		6.82746	0.887603	1.11969	0.504322	0.477607	0.72144		6.39203	1.41558	1.39584	0.919423	0.337626	0.797383		ENSMUSG00000015968			6.84133	-0.284509	0.789664	0.111159	0.738829	NA		9.77452	-1.0427	1.04306	0.955636	0.328289	1
ENSMUSG00000015971	Actr8	123.722	-1.19825	0.575764	4.5482	0.0329535	0.252021		109.175	0.142086	0.335513	0.183023	0.668788	0.84367		127.215	-0.841632	0.501628	3.25453	0.0712265	0.463961					110.862	0.145647	0.240821	0.360425	0.54827	NA		132.438	0.330742	0.403498	0.689446	0.406353	1
ENSMUSG00000015980	Lrrc27	2.74553	0.75895	3.19104	0.0388116	0.843822	NA		5.45278	3.11846	1.07385	7.95217	0.00480298	0.0463901		2.2483	-0.941568	2.09096	0.155955	0.692909	NA	B				7.92758	-0.107669	0.708757	0.0220262	0.882018	NA		1.84318	1.03932	1.80752	0.327956	0.566865	1
ENSMUSG00000015981	Stk32c	12.2575	-1.59872	2.80905	0.521568	0.470174	0.798492		7.74526	-0.339207	1.28189	0.110512	0.739562	0.88069		6.63238	-0.742262	2.06589	0.0544467	0.815499	0.972957					9.82809	0.162488	0.892515	0.024814	0.874831	NA		4.08093	-3.10068	1.90966	2.39733	0.121542	1
ENSMUSG00000015994	Fnta	257.115	0.0222384	0.546035	0.00177432	0.966401	0.991938		300.607	-0.408866	0.271246	2.23169	0.135206	0.373437		341.202	0.337255	0.368051	0.87402	0.349845	0.808478					260.882	0.144426	0.192552	0.553095	0.457056	0.830594		409.472	-0.114077	0.257466	0.194713	0.659023	1
ENSMUSG00000016018	Mtrex	32.6201	4.25487	1.3437	5.83893	0.0156754	0.169613		26.9649	1.3959	0.619371	4.87194	0.0272968	0.144214		20.8366	0.9733	0.924846	0.793511	0.37304	0.82045					29.1126	-0.0567933	0.47866	0.0121506	0.912227	NA		23.8128	-0.264802	0.623064	0.178698	0.672494	1
ENSMUSG00000016024	Lbp	9.23871	0.364226	2.14122	0.037181	0.847097	0.962		9.93469	1.49398	0.852791	3.13785	0.0764947	0.268029		6.43572	-0.803373	1.15352	0.580856	0.445977	0.858522					12.5499	-0.0942702	0.594368	0.0219809	0.882138	NA		5.92328	-0.109603	1.07053	0.0103024	0.919153	1
ENSMUSG00000016028	Celsr1	26.625	-2.29031	1.50819	3.00343	0.0830883	0.395673		20.9654	-1.06497	0.546297	3.73917	0.0531509	0.216589		36.6127	-0.887146	0.723456	1.73809	0.18738	0.672801					15.9207	0.321593	0.490298	0.424291	0.514804	NA		36.0791	-0.30708	0.485217	0.392237	0.531126	1
ENSMUSG00000016087	Fli1	746.472	-0.849467	0.554782	2.19717	0.138264	0.499065		767.083	0.293786	0.253633	1.34223	0.246642	0.517518		908.563	-0.674552	0.401548	2.76813	0.0961583	0.525443					636.478	-0.319405	0.152428	4.44342	0.0350361	0.353662		834.447	0.00262679	0.301498	7.54096e-05	0.993071	1
ENSMUSG00000016181	Utp25	29.9293	-0.146127	1.17543	0.0133802	0.907912	0.977617		29.7879	0.784324	0.409995	3.63215	0.0566734	0.225831		29.9124	-0.46957	0.573545	0.703535	0.401598	0.838131					27.7608	-0.271937	0.367582	0.557712	0.455184	NA		37.9512	0.0934045	0.445849	0.044379	0.83315	1
ENSMUSG00000016194	Hsd11b1	144.193	-0.535273	0.609217	0.871492	0.350543	0.718399		98.2534	-0.161869	0.308819	0.279216	0.597216	0.80369		140.693	-1.02553	0.420334	6.32977	0.0118728	0.20235					117.467	0.657347	0.237176	7.34181	0.00673689	0.192471		140.716	0.0309628	0.346574	0.00798108	0.928814	1
ENSMUSG00000016200	Syt14	673.264	3.03039	1.05363	4.16689	0.0412214	0.280677		930.476	2.0853	0.508841	16.6849	4.41317e-05	0.00134364		224.665	-0.892762	0.862245	0.701448	0.402297	0.83823	B				1283.58	0.0865635	0.347776	0.0618708	0.803563	0.949673		279.669	0.664607	0.563898	1.42338	0.232847	1
ENSMUSG00000016206	H2-M3	45.5692	-1.00089	1.32014	0.764766	0.381841	0.742688		38.0823	-1.19397	0.559751	4.11351	0.0425421	0.190559		65.4903	-0.10357	0.728787	0.0234827	0.878208	0.981894					29.7004	0.886018	0.460546	3.24001	0.0718603	NA		70.3444	0.00898256	0.504362	0.000319072	0.985748	1
ENSMUSG00000016252	Atp5e	3044.74	0.827618	0.355282	4.97394	0.025732	0.221604		3835.19	0.124548	0.275584	0.208981	0.647567	0.831621		3788.51	0.235903	0.459084	0.207169	0.648996	0.933433		ENSMUSG00000016252			3542.18	-0.043622	0.162193	0.0719876	0.788464	0.94812		4139.54	0.290351	0.307837	0.904453	0.341591	1
ENSMUSG00000016253	Nelfcd	61.1216	-0.637974	0.82451	0.669565	0.413203	0.766545		90.7268	0.233001	0.467604	0.251562	0.615977	0.815552		94.8353	0.1658	0.606132	0.0701434	0.791128	0.969495					103.016	0.376537	0.392878	0.782852	0.37627	NA		88.0474	-0.876363	0.548361	2.3757	0.123236	1
ENSMUSG00000016255	Tubb1	7.73985	3.315	2.37316	1.96946	0.160506	0.530164		11.9504	-0.62419	0.865487	0.496948	0.480844	0.723502		13.2937	2.43985	1.13376	2.86745	0.0903877	0.515774		ENSMUSG00000016255			8.72203	-0.578228	0.728265	0.633722	0.425993	NA		14.7975	-0.146281	0.772154	0.0345936	0.85245	1
ENSMUSG00000016256	Ctsz	134.897	0.866957	0.687582	1.2709	0.259598	0.637099		156.714	-0.18822	0.430051	0.196537	0.657531	0.838102		164.339	0.395363	0.548843	0.410441	0.521746	0.900625					144.479	0.172348	0.326977	0.270025	0.603315	0.900293		214.931	-0.344311	0.399806	0.7186	0.396603	1
ENSMUSG00000016257	Prelid3b	208.926	-0.184244	0.538383	0.128029	0.720484	0.911689		208.574	-0.0129884	0.255802	0.00251846	0.959976	0.986838		238.059	-0.0591497	0.400029	0.0249352	0.874529	0.981306					211.944	0.376713	0.19307	3.7478	0.0528771	0.413052		265.453	0.0158295	0.259137	0.00374216	0.951221	1
ENSMUSG00000016262	Sertad4	3.08815	5.91079	4.06805	1.59481	0.20664	NA		4.22929	0.530253	1.17317	0.19633	0.657699	0.838114		2.75606	5.00239	2.60581	3.69927	0.0544364	NA					3.12764	-0.883907	0.956855	0.916967	0.338273	NA		2.74498	-2.19235	1.77327	1.37857	0.240346	1
ENSMUSG00000016308	Ube2a	190.604	-0.0622256	0.606915	0.0115505	0.914414	0.978078		190.986	-0.188525	0.284075	0.440964	0.506658	0.741276		236.401	-0.0656761	0.285416	0.0533423	0.817346	0.97309					162.477	0.16479	0.205044	0.644915	0.421937	0.812494		264.934	-0.0382738	0.212098	0.0324819	0.856974	1
ENSMUSG00000016319	Slc25a5	509.93	0.341351	0.38978	0.750904	0.38619	0.745351		494.726	-0.433639	0.253451	2.88753	0.0892675	0.293034		625.198	0.307281	0.307277	1.00759	0.31548	0.782102		ENSMUSG00000016319			429.849	0.338303	0.187563	3.14868	0.0759886	0.466405		747.418	0.156773	0.247529	0.405834	0.524092	1
ENSMUSG00000016344	Ppdpf	148.946	1.55337	0.542088	7.2025	0.00728023	0.108046		150.357	-0.437109	0.29128	2.24083	0.134409	0.372385		167.752	0.950145	0.368139	6.05472	0.0138692	0.218968					117.26	0.0130083	0.214183	0.00370604	0.951457	0.987781		211.164	0.129003	0.274125	0.223849	0.636123	1
ENSMUSG00000016356	Col20a1	2.38683	1.3722	3.23731	0.119215	0.729887	NA		6.39368	0.584227	1.13822	0.215014	0.642866	0.829636		2.35373	1.23252	2.21046	0.307543	0.579192	NA					4.85566	-0.907098	0.858895	1.05219	0.305003	NA		2.3554	-1.13942	2.02791	0.284119	0.594014	1
ENSMUSG00000016382	Pls3	18.5608	-1.07622	1.20525	0.856158	0.354816	0.722331		62.3657	-1.83546	0.680698	6.11406	0.013411	0.092766		79.3174	2.16833	0.687823	10.1852	0.00141569	0.0653273					29.9763	-0.924371	0.639228	1.7329	0.188041	NA		78.3704	-0.54464	0.625994	0.724907	0.394539	1
ENSMUSG00000016386	Mpped2	2.12633	3.21565	4.71519	0.0578284	0.809962	NA		3.45462	-0.979959	1.14777	0.682831	0.408613	0.669303		4.66126	4.56322	1.84583	5.70143	0.0169511	0.240405					2.82224	0.497281	1.21238	0.0943448	0.758725	NA		5.83461	0.407721	1.24569	0.116003	0.733411	1
ENSMUSG00000016409	Nkap	111.87	-0.0102931	0.702848	0.000188002	0.98906	0.998108		100.732	0.259671	0.269559	0.932666	0.334171	0.603435		127.228	-0.245994	0.416891	0.351336	0.553358	0.908846					89.5589	-0.0345427	0.273141	0.0158889	0.899691	NA		142.813	0.330917	0.294568	1.28673	0.256652	1
ENSMUSG00000016427	Ndufa1	4334.42	0.596864	0.573114	0.88179	0.347712	0.716078		5698.42	-0.018815	0.378065	0.00255789	0.959664	0.986587		4635.9	0.128459	0.476881	0.0623481	0.802822	0.971112		ENSMUSG00000016427			5716.52	0.0758579	0.226743	0.111273	0.7387	0.941366		7044.19	0.708573	0.381323	3.59257	0.0580386	1
ENSMUSG00000016477	E2f3	33.1117	2.04847	1.92184	0.479522	0.488639	0.806861		37.287	0.758861	0.410911	3.53318	0.0601522	0.234001		32.2884	0.138848	1.04591	0.0108457	0.917056	0.990482					31.9484	-0.357119	0.408816	0.785415	0.37549	NA		36.4049	-0.00931522	0.449827	0.000423012	0.983591	1
ENSMUSG00000016481	Cr1l	375.153	-0.833032	0.409744	4.33679	0.0372971	0.267525		372.631	-0.31088	0.191281	2.632	0.104729	0.322681		497.31	-0.348035	0.283711	1.58887	0.207488	0.698969					341.817	0.269963	0.14788	3.25477	0.0712159	0.454713		488.642	-0.108919	0.223352	0.23607	0.627059	1
ENSMUSG00000016487	Ppfibp1	16.2491	-0.1707	1.57952	0.0131762	0.908613	0.977617		18.8786	-1.82413	0.708036	5.96494	0.0145931	0.0975764		27.2904	0.575367	0.940029	0.400701	0.526728	0.901328					16.5268	1.01712	0.496381	4.08072	0.0433752	NA		28.5272	-0.564698	0.717242	0.594051	0.440857	1
ENSMUSG00000016493	Cd46	18.5622	-0.343262	2.10496	0.0105186	0.918312	0.979177		11.3566	0.345337	0.817738	0.164948	0.684641	0.853351		19.2892	-0.804593	1.23977	0.340536	0.55952	0.910483					13.2658	0.651344	0.59414	0.992876	0.31904	NA		17.1969	-0.0348791	0.734828	0.00224948	0.962172	1
ENSMUSG00000016494	Cd34	19.2511	-0.553567	1.50513	0.163883	0.685606	0.899022		9.96477	-0.785594	0.697358	1.22713	0.267966	0.540897		20.5731	-0.683983	0.766774	0.971936	0.324198	0.787572					9.73289	1.07083	0.541883	3.6931	0.0546378	NA		14.546	-0.387925	0.804147	0.227218	0.633594	1
ENSMUSG00000016495	Plgrkt	178.273	-1.70402	0.587552	9.44806	0.00211372	0.0527524		142.16	-0.629213	0.237215	6.98472	0.00822085	0.0661388		228.708	-0.770316	0.318519	6.61789	0.0100959	0.184172					106.96	0.0207926	0.272229	0.00556945	0.94051	NA		204.664	-0.0717714	0.233281	0.0941776	0.758932	1
ENSMUSG00000016496	Cd274	233.348	0.294578	0.524424	0.301326	0.583052	0.85704		299.738	0.390076	0.311345	1.57416	0.209605	0.473641		251.68	0.0420787	0.435292	0.00934731	0.922979	0.991179					260.091	-0.380338	0.295524	1.70706	0.191368	0.640247		272.329	0.120558	0.39366	0.0941041	0.759023	1
ENSMUSG00000016498	Pdcd1lg2	10.5973	7.05446	2.46811	7.48537	0.00622023	0.100588		12.0113	2.26675	0.971894	4.76968	0.0289652	0.14983		6.45718	2.79943	1.46397	3.89833	0.048334	0.393696					13.3239	-0.0772488	0.758058	0.00952394	0.922257	NA		9.13554	1.51172	0.816486	3.65759	0.0558144	1
ENSMUSG00000016510	Mtif3	26.4809	0.0250779	1.2008	0.000403762	0.983969	0.996848		42.6695	-0.312519	0.46878	0.448961	0.502829	0.738877		39.9139	0.986299	0.6479	2.30774	0.128731	0.59581					33.2568	-0.221631	0.353421	0.383865	0.535542	NA		59.6385	-0.00468535	0.399186	0.000137861	0.990632	1
ENSMUSG00000016520	Lnx2	102.741	-1.47448	0.653631	5.91586	0.0150052	0.165314		98.1644	-1.04712	0.379343	7.24086	0.00712629	0.0604036		162.861	-0.131313	0.463575	0.0898615	0.764353	0.964378					47.0465	-0.455033	0.315954	2.15125	0.142453	NA		167.109	-0.56825	0.311096	3.20912	0.0732287	1
ENSMUSG00000016526	Dyrk3	25.2233	0.802178	1.11884	0.403929	0.525067	0.828544		58.9048	2.50868	0.332348	55.9357	7.48786e-14	2.39628e-11		24.4911	-0.320606	0.678137	0.193236	0.660237	0.935813	B		DYRK3		62.563	-0.491205	0.327606	2.3114	0.128428	NA		29.7312	0.318194	0.532356	0.360625	0.548159	1
ENSMUSG00000016528	Mapkapk2	2075.79	-0.290248	0.375601	0.638679	0.42419	0.773333		2000.93	0.437134	0.210603	4.33445	0.0373486	0.176462		2031.44	-0.347557	0.300119	1.48513	0.222974	0.713503					2017.44	0.204822	0.228321	0.793165	0.373145	0.782547		2078.36	-0.329963	0.22555	2.08569	0.148685	1
ENSMUSG00000016529	Il10	9.22207	8.80201	2.93074	6.28718	0.0121614	0.145236		1.37502	-0.205756	2.746	0.0221979	0.881562	NA		2.26938	3.1531	3.21177	0.658835	0.416972	NA					4.40994	1.53913	1.37445	0.981657	0.32179	NA		1.85417	-1.93269	2.90929	0.41572	0.519081	1
ENSMUSG00000016534	Lamp2	2104.35	-0.646918	0.441515	2.09686	0.147602	0.512354		2225.81	-0.640455	0.212075	8.94994	0.00277478	0.0315388		3060.63	-0.0873391	0.306282	0.0782219	0.779722	0.968383	B				1887.74	0.321661	0.149913	4.48321	0.0342293	0.351708		2948.95	-0.246272	0.269076	0.818768	0.365541	1
ENSMUSG00000016541	Atxn10	293.75	0.516797	0.428934	1.42837	0.232031	0.612823		342.708	0.369021	0.313242	1.41552	0.234143	0.504698		346.356	0.0948023	0.336883	0.0743183	0.78515	0.969379					411.384	0.484977	0.275183	2.95215	0.0857633	0.481869		357.674	-0.343248	0.255897	1.75532	0.18521	1
ENSMUSG00000016552	Foxred2	25.285	-1.23542	1.29644	1.11636	0.290703	0.66547		27.1186	-1.02643	0.59715	2.93223	0.0868276	0.288977		39.2604	0.159046	0.570465	0.0881135	0.766589	0.964572					10.8814	-1.20918	0.632237	3.48767	0.0618274	NA		47.2597	-0.630633	0.371583	2.79852	0.0943512	1
ENSMUSG00000016554	Eif3d	422.753	-0.176441	0.492023	0.136691	0.711593	0.909194		462.148	0.160342	0.230107	0.485381	0.485995	0.72647		513.628	0.0771558	0.336079	0.0556986	0.813428	0.972883					411.472	0.148852	0.161734	0.84633	0.357593	0.778525		617.008	-0.1768	0.279156	0.395658	0.52934	1
ENSMUSG00000016559	H3f3b	1353.3	-0.49597	0.395354	1.71316	0.190576	0.567872		1637.12	-0.452056	0.204371	4.84819	0.0276751	0.145403		1955.48	0.0209111	0.285293	0.00549276	0.94092	0.993699					1265.08	-0.11051	0.183671	0.36525	0.545605	0.873707		2254.86	0.0506506	0.203691	0.0620578	0.803273	1
ENSMUSG00000016619	Nup50	190.342	-0.114122	0.573706	0.0417028	0.838187	0.958372		233.457	0.665156	0.203105	10.7334	0.0010522	0.0158006		204.102	-0.407507	0.293997	2.01591	0.155658	0.629382	B				218.932	-0.304117	0.164999	3.42793	0.0641022	0.441107		224.071	-0.0112586	0.262363	0.00184185	0.965768	1
ENSMUSG00000016624	Phf21b	2.50336	0.00962427	3.2658	-0.0004652	1	NA		3.09098	1.34765	1.44777	0.844478	0.358119	NA		2.18357	0.175936	2.64078	0.0170473	0.896119	NA					4.1098	0.678274	0.955526	0.530003	0.466606	NA		2.62866	-1.43303	1.84476	0.54358	0.460953	1
ENSMUSG00000016637	Ift27	23.4378	1.29327	1.38584	0.553653	0.456829	0.790067		28.7128	-0.428765	0.387203	1.18297	0.276752	0.550745		34.4591	1.19263	0.666104	2.71011	0.0997144	0.532528					24.4263	0.238264	0.391284	0.36536	0.545544	NA		49.0971	-0.461425	0.403378	1.28443	0.257077	1
ENSMUSG00000016664	Pacsin2	420.654	-0.187363	0.574659	0.106412	0.744266	0.92231		555.308	-0.256491	0.25136	1.04923	0.305685	0.578268		573.079	-0.183453	0.383366	0.197779	0.656519	0.935599					525.483	0.0168218	0.167246	0.0101657	0.919689	0.981307		625.534	-0.128884	0.307859	0.173184	0.677298	1
ENSMUSG00000016756	Cmah	301.836	0.254724	0.494054	0.251615	0.61594	0.870672		322.105	0.375993	0.238062	2.52001	0.11241	0.335646		372.036	-0.0721875	0.35473	0.0370134	0.847438	0.97464					282.448	-0.11892	0.186849	0.403827	0.525119	0.860637		384.508	0.0482784	0.265795	0.0331118	0.855609	1
ENSMUSG00000016757	Ttll12	66.8116	1.37827	0.70803	3.32699	0.0681513	0.363147		78.4283	1.17827	0.319261	13.402	0.000251358	0.00548456		55.0966	0.0596926	0.506304	0.0136856	0.906872	0.987358	B				77.8953	-0.271763	0.240638	1.30238	0.25378	NA		57.4087	-0.356069	0.432489	0.662791	0.415576	1
ENSMUSG00000016758	Bik	1.21254	5.0525	5.48619	0.88051	0.348062	NA		6.04472	0.0693394	1.45506	0.00127247	0.971544	0.99092		6.50189	5.72028	2.08245	6.21281	0.0126829	0.210071					3.13292	-0.0468785	1.26621	0.00191158	0.965126	NA		8.15848	-0.240606	1.36386	0.0335612	0.854643	1
ENSMUSG00000016831	Tox4	122.311	-0.327291	0.643961	0.278902	0.597422	0.863044		102.126	0.0336503	0.29808	0.0124679	0.911093	0.965038		137.513	-0.326595	0.397428	0.740278	0.389572	0.833538					85.7717	0.212901	0.271641	0.589066	0.44278	NA		148.325	-0.274347	0.297796	0.836401	0.360428	1
ENSMUSG00000016833	Mrps18c	138.668	0.710434	0.624209	1.09858	0.294578	0.668719		140.016	-0.235458	0.279113	0.7117	0.39888	0.661554		155.655	0.213965	0.409204	0.242122	0.622677	0.926625					143.282	0.43111	0.245007	2.9888	0.0838424	0.476109		194.373	0.619974	0.360016	3.05328	0.0805741	1
ENSMUSG00000016918	Sulf1	3.6514	5.34076	3.41566	1.40729	0.235507	NA		4.71181	0.599869	1.13708	0.193091	0.660357	0.839198		2.42318	3.17765	2.30194	1.73129	0.188247	NA					3.94069	-1.0729	0.972606	0.873561	0.349971	NA		1.90081	-4.0876	2.12598	3.49335	0.0616159	1
ENSMUSG00000016921	Srsf6	291.348	0.761795	0.450963	2.72569	0.0987454	0.430502		364.027	0.106792	0.247599	0.186455	0.665883	0.841543		343.972	0.28985	0.359114	0.605284	0.436569	0.854522					320.86	-0.194733	0.183085	1.15224	0.28308	0.723842		429.923	-0.106967	0.284032	0.140667	0.707619	1
ENSMUSG00000016933	Plcg1	99.396	0.020634	0.650061	0.001077	0.97382	0.993654		74.6201	0.36738	0.374648	0.943985	0.331255	0.601133		96.9001	-0.472552	0.461866	1.18985	0.27536	0.753575					72.796	0.273595	0.334769	0.66595	0.414467	NA		107.083	-0.304131	0.403155	0.558324	0.454936	1
ENSMUSG00000016940	Kctd2	259.175	-2.52362	0.766437	14.1182	0.000171672	0.0103417		261	-0.173948	0.236493	0.534192	0.46485	0.713173		399.486	-0.446107	0.514058	0.922841	0.33673	0.795933	A				208.033	0.28947	0.261488	1.16509	0.280412	0.721419		343.401	-0.35581	0.40169	0.762695	0.382487	1
ENSMUSG00000016946	Kctd5	45.1463	0.0654173	0.865456	0.00606773	0.937911	0.985087		56.4787	-0.462016	0.448095	0.999008	0.317551	0.589789		65.9035	0.42992	0.507293	0.792224	0.373429	0.82045					45.6037	-0.0371096	0.347434	0.0111804	0.915791	NA		72.289	0.0739423	0.395894	0.0351045	0.851377	1
ENSMUSG00000016984	Etaa1	48.6985	0.490873	1.00193	0.250467	0.616747	0.871061		41.7607	0.0329345	0.408251	0.00631614	0.936656	0.976481		52.3775	-0.212354	0.529861	0.157011	0.691923	0.944129					36.0413	-0.0114879	0.381912	0.000837266	0.976916	NA		55.3629	0.401999	0.383485	1.12405	0.289048	1
ENSMUSG00000017002	Slpi	909.5	-0.719707	0.398238	3.57656	0.0586005	0.335813		942.96	0.381668	0.329415	1.35795	0.243893	0.514766		949.682	-1.08864	0.352946	10.0525	0.00152142	0.0686737					1389.21	0.741451	0.287312	6.35488	0.0117059	0.245252		1013.87	0.192651	0.306417	0.400511	0.526826	1
ENSMUSG00000017009	Sdc4	75.4505	1.40813	0.897989	1.96095	0.161412	0.530879		88.6387	-1.24068	0.539286	4.8999	0.0268583	0.142515		121.477	1.8433	0.737326	5.81936	0.0158507	0.233944					46.7959	-0.108956	0.498632	0.0484979	0.825698	NA		133.399	-0.851917	0.656899	1.56237	0.211319	1
ENSMUSG00000017057	Il13ra1	161.999	-1.33757	0.552548	6.48362	0.0108873	0.136282		108.006	0.295877	0.360975	0.674077	0.411634	0.67195		160.383	-1.40586	0.475309	10.6277	0.00111408	0.0558349					180.787	1.15125	0.268109	17.0755	3.5922e-05	0.0423341		146.501	0.151233	0.3759	0.1639	0.685591	1
ENSMUSG00000017119	Nbr1	353.597	0.665475	0.433215	2.24396	0.134137	0.492304		630.178	0.993973	0.277056	12.913	0.0003263	0.00651572		410.947	0.291707	0.395144	0.517278	0.472005	0.87256	B				675.346	-0.0920217	0.276605	0.111458	0.738491	0.941366		441.309	-0.189536	0.359467	0.274093	0.600599	1
ENSMUSG00000017132	Cyth1	126.186	0.663658	0.578586	1.29231	0.255622	0.632696		122.695	-0.278449	0.248195	1.25787	0.262055	0.534087		157.572	0.349153	0.362615	0.863697	0.352706	0.809775					96.2107	0.109686	0.216592	0.259202	0.610669	NA		202.654	0.115031	0.273005	0.178865	0.672351	1
ENSMUSG00000017144	Rnd3	17.0599	-3.02574	1.66103	5.00191	0.0253194	0.220221		15.4944	-1.27311	0.729295	2.59689	0.107074	0.326688		25.6061	0.692912	1.17744	0.340144	0.559746	0.910483					8.60894	-0.235537	0.711363	0.100276	0.751498	NA		23.7927	-0.202608	0.758271	0.0706969	0.790325	1
ENSMUSG00000017146	Brca1	8.59768	1.49333	2.1657	0.29418	0.587554	0.857869		14.6087	0.821465	0.635159	1.71954	0.189753	0.449492		10.8605	0.5418	1.06915	0.191124	0.661982	0.935813					15.6595	-0.0215953	0.512771	0.00177	0.966442	NA		14.5917	0.51826	0.700018	0.558456	0.454883	1
ENSMUSG00000017167	Cntnap1	3.99595	1.09829	4.23876	-0.02492	1	NA		6.46354	-1.46071	1.22406	1.37848	0.24036	0.511363		9.81448	3.33266	1.69519	1.77636	0.182597	0.668956					2.99927	0.0757204	1.13584	-0.0101559	1	NA		10.4389	0.354039	1.0681	0.109881	0.74028	1
ENSMUSG00000017176	Nt5c3b	21.163	0.834148	1.33719	0.380981	0.537079	0.835509		26.9312	-0.37678	0.429517	0.769027	0.380518	0.645908		30.6578	1.31662	0.608921	4.46237	0.0346494	0.336551					18.1677	-0.083713	0.425879	0.0394077	0.842643	NA		50.3953	0.900419	0.433098	4.48374	0.0342188	1
ENSMUSG00000017188	Coa3	274.808	-0.320923	0.517245	0.381006	0.537065	0.835509		373.076	-0.641804	0.202753	9.86114	0.00168807	0.0222414		463.425	0.44479	0.33574	1.68548	0.194198	0.68083	B				287.202	0.0854068	0.176572	0.230673	0.631025	0.908014		582.701	0.200996	0.252109	0.644454	0.422102	1
ENSMUSG00000017195	Zpbp2	1.10162	4.47326	5.65577	0.729965	0.392894	NA		2.71266	-1.08127	1.15463	0.97429	0.323613	NA		3.60375	4.29404	1.78372	4.88113	0.0271518	NA					2.01928	0.260931	1.12489	-0.0013046	1	NA		5.5051	-0.505822	0.9967	0.251776	0.615827	1
ENSMUSG00000017204	Gsdma	14.3709	-2.324	2.7195	0.873965	0.34986	0.717738		39.4961	1.87442	1.74807	0.972935	0.323949	0.595533		26.2169	0.496283	1.44291	0.140082	0.708199	0.950301					22.1412	-0.653297	1.36869	0.0991125	0.752897	NA		49.4304	2.11234	1.34552	2.66813	0.102376	1
ENSMUSG00000017210	Med24	72.6057	1.25952	0.791396	1.99315	0.158012	0.528142		111.494	0.853479	0.353243	5.93654	0.0148301	0.0986459		48.6819	-0.274187	0.505293	0.280852	0.596144	0.920733					119.125	-0.138077	0.280104	0.233984	0.628585	0.906162		55.9474	0.150297	0.508399	0.0881771	0.766508	1
ENSMUSG00000017221	Psmd3	420.639	-0.409911	0.675935	0.438083	0.508049	0.819756		481.623	-0.123108	0.289106	0.18021	0.671193	0.844736		568.594	0.319	0.515763	0.430278	0.511853	0.895638		ENSMUSG00000017221			343.162	-0.153495	0.209193	0.536381	0.463937	0.832818		694.282	0.0750628	0.380174	0.0392398	0.842974	1
ENSMUSG00000017264	Exosc10	114.457	1.9368	0.587934	9.71424	0.00182845	0.0484455		126.732	0.00494902	0.305292	0.000260503	0.987123	0.997723		132.428	0.997043	0.422298	4.76849	0.0289853	0.311128	A				121.534	0.19766	0.261203	0.551524	0.457696	0.830748		193.432	0.155977	0.273149	0.330436	0.565402	1
ENSMUSG00000017286	Glod4	81.8361	0.170429	0.796206	0.037557	0.846335	0.961885		89.466	-0.818026	0.347054	5.33519	0.0208991	0.122344		130.168	0.529427	0.463907	1.14942	0.28367	0.760078					71.1829	0.451817	0.234883	3.57236	0.0587488	NA		167.273	-0.0765219	0.346963	0.0482069	0.826213	1
ENSMUSG00000017288	Vps53	246.608	0.423167	0.597855	0.420818	0.516529	0.824248		352.154	0.113024	0.287454	0.155833	0.693023	0.857578		286.48	-0.0214225	0.412559	0.00230235	0.96173	0.996196					313.597	-0.268482	0.19118	1.98576	0.158785	0.602799		317.181	0.139137	0.293975	0.225415	0.634944	1
ENSMUSG00000017291	Taok1	308.64	-0.444123	0.477732	0.830281	0.362191	0.728978		335.122	0.444144	0.201643	4.85634	0.0275447	0.144929		350.516	-0.422334	0.315589	1.85846	0.172803	0.655748					322.816	-0.0469202	0.152721	0.0927609	0.760696	0.945654		370.791	0.0717699	0.237692	0.0915027	0.762275	1
ENSMUSG00000017299	Dnttip1	304.843	-0.234427	0.510351	0.198017	0.656326	0.887572		511.313	0.622939	0.231958	7.36336	0.00665664	0.0575749		322.587	-0.151355	0.315877	0.233265	0.629113	0.928251					515.024	-0.22676	0.220841	1.07223	0.300443	0.737018		369.32	-0.0372252	0.30319	0.0150335	0.902415	1
ENSMUSG00000017309	Cd300lg	15.2949	-1.47598	1.4061	1.43234	0.231384	0.6122		17.9015	-1.24869	0.753259	2.69006	0.100976	0.314548		28.6928	0.48621	0.699129	0.527636	0.467603	0.872334					12.6598	0.840758	0.585633	1.83809	0.175175	NA		39.7569	-0.156604	0.526808	0.0874733	0.767414	1
ENSMUSG00000017314	Mpp2	173.676	5.58081	0.792827	30.8317	2.81408e-08	8.39352e-06		224.336	2.30619	0.299849	57.4826	3.40982e-14	1.14197e-11		75.5761	1.79057	0.617645	5.10356	0.0238768	0.281079	C				238.473	-0.473242	0.232	4.29907	0.0381332	0.369704		84.2898	0.249278	0.384628	0.426547	0.513688	1
ENSMUSG00000017376	Nlk	1165.21	-1.25576	0.418839	9.62546	0.00191899	0.0499304		1391.95	0.0769791	0.25763	0.0906486	0.763354	0.893252		1639.56	-0.608489	0.354959	2.8273	0.0926742	0.519741	A				1173.91	-0.160145	0.183896	0.761288	0.382926	0.788464		1732.16	0.00719017	0.278566	0.00066305	0.979457	1
ENSMUSG00000017386	Traf4	27.3387	2.47962	1.94977	0.686858	0.407235	0.762646		47.8705	-0.111982	0.402629	0.0741781	0.785348	0.906888		38.8909	2.47931	0.995715	4.32445	0.0375685	0.352014					35.8752	-0.328036	0.289726	1.21935	0.269489	NA		56.619	-0.142245	0.456665	0.0961727	0.756472	1
ENSMUSG00000017390	Aldoc	17.5409	-2.28459	2.57782	0.222546	0.637107	0.879135		29.3084	-0.51327	0.451004	1.29046	0.255964	0.527678		24.4167	0.88642	1.26891	0.370307	0.542837	0.90653					25.0483	-0.0362885	0.341933	0.0110707	0.916203	NA		32.1399	0.322033	0.602972	0.290622	0.589822	1
ENSMUSG00000017400	Stac2	15.3415	-0.177805	1.35446	0.0192418	0.889675	0.972886		20.1974	-0.35457	0.547196	0.433145	0.51045	0.744178		23.4335	0.608388	0.623433	0.933116	0.334055	0.793873					15.0346	0.239333	0.555208	0.168105	0.681801	NA		28.2029	-0.619187	0.498887	1.4902	0.222185	1
ENSMUSG00000017404	Rpl19	2045.61	0.908968	0.529032	2.41618	0.120088	0.47085		2649.86	-0.0718253	0.293494	0.0607225	0.805358	0.915314		2508.42	0.405808	0.428484	0.719611	0.396272	0.837439					2507.7	0.0364402	0.169094	0.0459869	0.8302	0.952517		3222.06	0.398311	0.316584	1.61695	0.203518	1
ENSMUSG00000017405	Nek8	14.472	-1.57985	1.58249	0.745896	0.387779	0.747025		16.9087	0.50393	0.776967	0.431656	0.511178	0.744334		12.6518	-1.26857	1.21484	1.02953	0.31027	0.778188					14.2141	-0.548671	0.481256	1.30593	0.253133	NA		16.7645	0.820216	1.07116	0.598976	0.438969	1
ENSMUSG00000017412	Cacnb4	2.23523	4.10437	3.79141	0.465048	0.495274	NA		3.71244	0.993092	0.927896	1.0833	0.29796	0.570933		2.20535	3.32153	2.00524	2.34732	0.125498	NA					5.28385	0.656201	0.705823	0.856873	0.354615	NA		3.69257	1.21768	1.05054	1.38372	0.239469	1
ENSMUSG00000017417	Plxdc1	1.98468	-1.14968	5.49482	0.034171	0.853343	NA		4.01837	-0.159765	1.23332	0.0403091	0.840877	0.931551		3.70774	0.707946	2.03143	0.0666448	0.796286	NA					3.03562	0.132173	0.965306	0.019326	0.889436	NA		9.53797	1.45491	0.876843	2.958	0.0854535	1
ENSMUSG00000017418	Arl5b	52.0346	0.336137	0.977947	0.104865	0.746068	0.922514		58.5548	-0.196107	0.388784	0.2524	0.61539	0.815299		65.053	0.078896	0.497559	0.022893	0.879736	0.982012					60.4559	0.327323	0.264329	1.47714	0.224222	NA		77.5351	0.0622529	0.419377	0.0221019	0.881816	1
ENSMUSG00000017421	Zfp207	590.216	-0.185111	0.474536	0.144167	0.704173	0.90569		619.185	-0.150003	0.217838	0.470276	0.49286	0.731626		736.498	-0.0542909	0.336902	0.0263676	0.871006	0.98057					578.748	0.21415	0.142674	2.22699	0.135617	0.565356		828.526	0.27547	0.2684	1.07249	0.300383	1
ENSMUSG00000017428	Psmd11	463.921	1.26534	0.596521	3.48702	0.061852	0.345045		669.971	0.596731	0.23871	6.35252	0.0117214	0.0847351		570.53	0.524409	0.430571	1.16733	0.279951	0.758061		ENSMUSG00000017428			652.797	-0.12582	0.192246	0.428792	0.512582	0.853519		737.829	0.175645	0.300672	0.343493	0.55782	1
ENSMUSG00000017466	Timp2	266.438	-0.148987	0.679855	0.052074	0.819493	0.952364		352.863	0.452451	0.266579	2.87843	0.0897735	0.293849		351.299	0.00733132	0.387849	0.000372803	0.984595	0.998163					369.658	0.270134	0.278404	0.887205	0.346236	0.7686		349.629	-0.507868	0.345269	2.08061	0.14918	1
ENSMUSG00000017478	Zc3h18	252.702	0.354906	0.623345	0.357674	0.549801	0.843224		240.417	0.171676	0.237202	0.51757	0.47188	0.718559		288.662	0.063166	0.391894	0.0267637	0.870049	0.980474					212.037	0.241056	0.218349	1.13975	0.285706	0.72688		347.421	0.0887023	0.302687	0.0865659	0.768589	1
ENSMUSG00000017485	Top2b	806.891	-0.178583	0.434015	0.182869	0.668919	0.892513		741.722	-0.544412	0.272236	3.86778	0.0492217	0.207445		1019.87	0.0512929	0.352666	0.0227368	0.880143	0.982012					589.151	0.180496	0.182879	0.942597	0.331611	0.762628		1069.92	-0.489612	0.278064	2.9798	0.0843095	1
ENSMUSG00000017493	Igfbp4	1031.5	-0.328523	0.478869	0.483789	0.486711	0.806373		696.224	-0.171431	0.333366	0.261806	0.608882	0.810998		999.026	-0.714328	0.312565	5.55394	0.0184391	0.250139					619.253	0.200504	0.28579	0.488292	0.48469	0.84121		1036.3	-0.510623	0.254976	3.85118	0.049711	1
ENSMUSG00000017499	Cdc6	13.3869	-1.48484	1.42105	1.20195	0.272932	0.649088		12.9736	0.151681	0.801039	0.0358447	0.849836	0.935808		16.2551	-0.975517	0.986007	1.0817	0.298317	0.770062					13.6672	0.397104	0.474108	0.640677	0.423466	NA		15.7377	0.118124	0.790351	0.0220911	0.881845	1
ENSMUSG00000017548	Suz12	80.5673	1.07494	0.978508	0.83524	0.360762	0.727892		111.461	0.455585	0.337961	1.78553	0.181472	0.438443		103.225	0.569955	0.568524	0.818224	0.3657	0.817267					89.7879	-0.545401	0.284319	3.67896	0.0551033	NA		113.217	-0.0101753	0.307979	0.00108669	0.973703	1
ENSMUSG00000017550	Atad5	53.8058	-0.627481	0.917351	0.413621	0.520137	0.826252		41.5387	0.724662	0.458308	2.44949	0.117563	0.343901		48.7423	-1.22617	0.533683	5.40462	0.0200835	0.260678					35.1796	-0.330501	0.372314	0.758105	0.383922	NA		40.4682	0.694101	0.530297	1.75606	0.185116	1
ENSMUSG00000017561	Crlf3	1081.46	-0.0566976	0.507208	0.0130911	0.908908	0.977617		965.806	0.408421	0.191362	4.59941	0.0319829	0.160371		1060.95	-0.586651	0.312527	3.803	0.0511607	0.402117					1100.92	0.257484	0.248308	1.0562	0.304083	0.73775		1160.63	-0.11302	0.242881	0.21476	0.643062	1
[truncated: 14,230 more rows]

## Sheet: SupTable.2
Supplementary Table 2. Results of the ORA analysis in the three comparisons.
1st Comparison: 3 mo. 3xTg-AD vs 3 mo. C57BL/6 mice
[truncated: 17 more rows]
